# Supplementary material for: A CRISPR-based screen for Hedgehog signaling provides insights into ciliary function and ciliopathies
Source: Springer Nature journal article supplement (doi:10.1038/s41588-018-0054-7), 2018-02-07
Supplement: MOESM5 [file 41588_2018_54_MOESM5_ESM%20(2).xlsx]

## Sheet: Overview
Table S3
Worksheet	Description
All data	Full data from genome-wide screen
Filtered data	Data from genome-wide screen with growth defect and no NCBI genes removed. Sorted first by casTLE p-value, then by casTLE effect size
Top 472_pos_reg	Positive regulators (genes with negative effect size) among the top 472 hit genes, by casTLE p-value, from filtered data worksheet
Top 472_neg_reg	Negative regulators (genes with positive effect size) among the top 472 hit genes, by casTLE p-value, from filtered data worksheet
Growth defect	Data from genome-wide screen for genes filtered out due to strong growth defect
no NCBI	Data from genome-wide screen for gennes filtered out because a matching NCBI ID was not found
Replicates, Batches A-C vs D	Comparison of genome-wide screen data for select genes measured in Batch D as well as one of Batches A-C
SAGvsShnnN_mini-screen_compare	Comparison of screen data for a cilia/Hh-focused gene set analyzed in SAG- vs ShhN-stimulated cells
Columns	Description
casTLE p-value	p-value determined using casTLE algoritm. 100.000 sgRNA permutations were performed to get p-values from casTLE scores. Except for mini-screen, where 200,00000 permutations were used.
casTLE Effect	Estimated magnitude of phenotype resulting from complete loss of function
casTLE Score	casTLE score (approximate likelihood ratio that the observed sgRNA abundance changes differ from those of negative control sgRNAs)
Minimum Effect Estimate	Lower bound for estimated magnitude of phenotype resulting from complete loss of function
Maximum Effect Estimate	Upper bound for estimated magnitude of phenotype resulting from complete loss of function
pMW	p-value determined using one-sided Mann-Whitney test
pKS	p-value determined using two-sided Kolmogorov-Smirnov test
Individual elements	Effect size observed for all individual sgRNAs targeting a given gene
Num dup sgRNAs	Number of sgRNAs targeting a gene that are non-unique
Growth_flag	Indicates whether gene was filtered from further analysis due to strong growth phenotype
Growth reference gene	Indicates whether gene was part of expected essential gene (1) or non-essential gene (0) reference gene sets
Cilia/hh reference gene	Indicates whether gene was part of expected cilia/Hh hit (1) or non-hit (0) reference gene sets
	Note: Genes having a '1' in either the 10% FDR hit or 20% FDR hit columns together comprise the full 20% FDR group
	Note: NaN indicates data not measured/available, or for reference classsification, genes that are neither positive or negative reference genes
	Note: Number of elements in each category/batch can be found in Supplementary Figure 2a.

## Sheet: All data
#GeneID	Gene name (mouse)	Alt name	Gene name (human)	KO Batch	GeneInfo	Localization	Process	Function	Element #	casTLE Effect (Growth)	casTLE Score (Growth)	casTLE p-value (Growth)	Signaling pMW	Signaling pKS	Signaling casTLE Effect	Signaling casTLE Score	Signaling casTLE p-value	Minimum Effect Estimate	Maximum Effect Estimate	Individual Elements										NCBI ID	Num dup sgRNAs	Growth flag	Growth reference gene	Cilia/hh reference gene	10% FDR hit?	20% FDR hit?	Roosing et al Score	Roosing et al 10% FDR hit?	Roosing et al 20% FDR hit?	Wheway et al z score	Wheway et al hit?	Jacob et al hit?
ENSMUSG00000039801	2410089E03RIK		C5ORF42	A	RIKEN cDNA 2410089E03 gene	cellular_component|membrane|integral component of membrane|	biological_process|	molecular_function|	10	-1	11	0.209	0.000428	0.00641	-4.24	54.1	1e-05	-7.11	-3.09	-4.38 : 174451.9	-3.33 : 174443.1	-1.49 : 174446.4	-0.945 : 174449.7	-0.922 : 174444.2	-0.59 : 174450.8	-0.236 : 174452.10	-0.0902 : 174447.5	-0.0389 : 174445.3	0.0658 : 174448.6	73692	0	0	NaN	1	1	0	0.87126	1	0	NaN	NaN	0
ENSMUSG00000037466	4930427A07RIK		C14ORF80	A	RIKEN cDNA 4930427A07 gene	cellular_component|	biological_process|	molecular_function|	10	-2.3	33.7	0.0212	0.00627	0.00182	-4.12	64.4	1e-05	-6.58	-3.14	-4.28 : 5763.8	-3.57 : 5761.6	-2.76 : 5757.2	-2.64 : 5765.10	-1.7 : 5760.5	-1.39 : 5764.9	-0.259 : 5759.4	0.135 : 5762.7	0.228 : 5758.3	0.388 : 5756.1	104732	0	0	NaN	NaN	1	0	0.550303	0	0	1.17569	0	0
ENSMUSG00000029580	ACTB		ACTB	A	actin, beta	nuclear chromatin|extracellular space|nucleoplasm|cytoplasm|cytosol|cytoskeleton|postsynaptic density|membrane|axon|ribonucleoprotein complex|cortical cytoskeleton|NuA4 histone acetyltransferase complex|cytoplasmic ribonucleoprotein granule|protein complex|extracellular vesicular exosome|MLL5-L complex|blood microparticle|	retina homeostasis|chromatin organization|protein folding|cellular component movement|axon guidance|blood coagulation|substantia nigra development|cell junction assembly|adherens junction organization|Fc-gamma receptor signaling pathway involved in phagocytosis|ATP-dependent chromatin remodeling|cellular protein metabolic process|innate immune response|cell-cell junction organization|'de novo' po…	RNA polymerase II core promoter proximal region sequence-specific DNA binding|RNA polymerase II distal enhancer sequence-specific DNA binding|structural constituent of cytoskeleton|protein binding|ATP binding|kinesin binding|protein kinase binding|Tat protein binding|nucleosomal DNA binding|nitric-oxide synthase binding|	9	-6.4	52	0.00404	2.56e-07	5.33e-08	-8.2	103	1e-05	-13.2	-6.67	-8.32 : 227837.5	-5.22 : 227840.8	-3.08 : 227833.1	-2.73 : 227838.6	-2.18 : 227834.2	-2.07 : 227841.9	-1.67 : 227839.7	-1.62 : 227835.3	-1.11 : 227842.10		11461	0	-1	NaN	NaN	NaN	NaN	0.45479	0	0	-5.8819	1	0
ENSMUSG00000025134	ALYREF		ALYREF	A	Aly/REF export factor	transcription export complex|nucleoplasm|cytosol|membrane|nuclear speck|exon-exon junction complex|extracellular vesicular exosome|catalytic step 2 spliceosome|	regulation of DNA recombination|mRNA splicing, via spliceosome|mRNA splicing, via spliceosome|osteoblast differentiation|transcription from RNA polymerase II promoter|termination of RNA polymerase II transcription|mRNA export from nucleus|mRNA export from nucleus|RNA splicing|gene expression|mRNA 3'-end processing|replication fork processing|positive regulation of DNA-templated transcription, elo…	nucleotide binding|protein binding|poly(A) RNA binding|	10	-2.8	59.4	0.00137	1.9e-07	3.64e-07	-2.31	58	1e-05	-3.47	-1.72	-2.54 : 44560.5	-2.41 : 44563.8	-1.99 : 44565.10	-1.88 : 44562.7	-1.8 : 44557.2	-1.73 : 44556.1	-1.1 : 44559.4	-1.05 : 44564.9	-1.02 : 44558.3	-0.331 : 44561.6	21681	0	-1	1	NaN	NaN	NaN	0.315917	0	0	-7.64207	1	0
ENSMUSG00000022911	ARL13B		ARL13B	A	ADP-ribosylation factor-like 13B	intracellular|cilium|cilium|ciliary membrane|primary cilium|	smoothened signaling pathway|small GTPase mediated signal transduction|determination of left/right symmetry|dorsal/ventral pattern formation|neural tube patterning|interneuron migration from the subpallium to the cortex|formation of radial glial scaffolds|nonmotile primary cilium assembly|cilium assembly|	protein binding|GTP binding|	10	-0.4	2.09	0.558	1.37e-05	5.79e-07	-3.72	66	1e-05	-5.55	-3.1	-3.92 : 185630.1	-3.78 : 185632.3	-2.52 : 185636.7	-1.89 : 185639.10	-1.83 : 185633.4	-1.8 : 185638.9	-1.77 : 185634.5	-0.991 : 185635.6	-0.808 : 185631.2	0.603 : 185637.8	68146	0	0	NaN	1	1	0	0.759699	1	0	-1.65999	0	0
ENSMUSG00000025035	ARL3		ARL3	B	ADP-ribosylation factor-like 3	Golgi membrane|nucleus|Golgi apparatus|centrosome|spindle microtubule|cytoplasmic microtubule|midbody|photoreceptor connecting cilium|extracellular vesicular exosome|primary cilium|	cytokinesis|kidney development|GTP catabolic process|post-Golgi vesicle-mediated transport|small GTPase mediated signal transduction|protein transport|intraciliary transport|photoreceptor cell development|cilium morphogenesis|	GTPase activity|protein binding|GTP binding|microtubule binding|GDP binding|metal ion binding|	10	-0.6	4.96	0.454	8.61e-07	5.02e-07	-4	126	1e-05	-5.8	-3.43	-4.14 : 83228.4	-3.93 : 83227.3	-3.67 : 83226.2	-2.75 : 83232.8	-2.24 : 83230.6	-2.22 : 83231.7	-2.06 : 83234.10	-1.97 : 83229.5	-0.812 : 83233.9	-0.0256 : 83225.1	56350	0	0	NaN	1	1	0	0.633689	0	0	-0.230944	0	0
ENSMUSG00000022722	ARL6		ARL6	C	ADP-ribosylation factor-like 6	cytoplasm|axonemal microtubule|axoneme|membrane|membrane coat|BBSome|ciliary membrane|extracellular vesicular exosome|	protein targeting to membrane|small GTPase mediated signal transduction|determination of left/right symmetry|visual perception|Wnt signaling pathway|melanosome transport|cilium assembly|cilium assembly|fat cell differentiation|protein polymerization|	protein binding|GTP binding|phospholipid binding|metal ion binding|	10	0	0	0.973	1.09e-06	2.32e-07	-3.18	99.6	1e-05	-4.59	-2.39	-3.35 : 77570.2	-2.95 : 77577.9	-2.46 : 77572.4	-2.06 : 77578.10	-1.94 : 77573.5	-1.76 : 77574.6	-1.71 : 77576.8	-1.58 : 77571.3	-1.5 : 77569.1	0.0216 : 77575.7	56297	0	0	NaN	1	1	0	0.865272	1	0	-0.715989	0	0
ENSMUSG00000020412	ASCC2		ASCC2	B	activating signal cointegrator 1 complex subunit 2	None	transcription, DNA-templated|regulation of transcription, DNA-templated|	None	10	0.2	0.999	0.779	0.000247	0.000219	-3.53	55.6	1e-05	-5.29	-1.87	-3.66 : 19623.9	-2.26 : 19619.5	-2.08 : 19616.2	-1.79 : 19622.8	-1.26 : 19617.3	-1.07 : 19618.4	-0.885 : 19624.10	-0.155 : 19620.6	0.00493 : 19621.7	0.224 : 19615.1	75452	0	0	NaN	NaN	1	0	0.18641	0	0	-1.06726	0	0
ENSMUSG00000001039	B9D1		B9D1	A	B9 protein domain 1	cytoplasm|centrosome|membrane|ciliary transition zone|TCTN-B9D complex|ciliary basal body|	in utero embryonic development|smoothened signaling pathway|regulation of protein localization|cardiocyte differentiation|cilium assembly|embryonic digit morphogenesis|camera-type eye development|cilium morphogenesis|neuroepithelial cell differentiation|	hedgehog receptor activity|	10	-2.7	2.73	0.502	7.34e-07	2.91e-07	-4.37	125	1e-05	-6.27	-3.46	-4.57 : 164824.2	-3.93 : 164832.10	-3.69 : 164825.3	-3.45 : 164829.7	-2.95 : 164823.1	-2.83 : 164830.8	-2.54 : 164828.6	-1.77 : 164831.9	-1.22 : 164826.4	-0.0401 : 164827.5	27078	0	0	NaN	1	1	0	0.740532	1	0	-6.86962	0	0
ENSMUSG00000063439	B9D2		B9D2	A	B9 protein domain 2	nucleus|centrosome|cytosol|membrane|TCTN-B9D complex|ciliary basal body|	mitotic cell cycle|cilium assembly|	protein binding|gamma-tubulin binding|	10	-3.1	9.4	0.232	3.42e-07	5.3e-07	-5.84	150	1e-05	-8.57	-5.22	-6.0 : 35393.9	-5.82 : 35387.3	-3.68 : 35386.2	-3.54 : 35394.10	-3.21 : 35389.5	-2.47 : 35385.1	-2.3 : 35390.6	-1.29 : 35391.7	-0.875 : 35392.8	-0.178 : 35388.4	232987	0	0	NaN	1	1	0	0.64883	0	1	-4.98843	0	0
ENSMUSG00000035759	BBS10		BBS10	C	Bardet-Biedl syndrome 10	cilium|	retina homeostasis|visual perception|nonmotile primary cilium assembly|regulation of protein complex assembly|cellular protein metabolic process|photoreceptor cell maintenance|response to stimulus|chaperone-mediated protein complex assembly|	RNA polymerase II repressing transcription factor binding|protein binding|ATP binding|	10	-1.1	6.3	0.473	1.02e-07	7.49e-08	-3.6	127	1e-05	-5.09	-2.86	-3.75 : 93742.6	-3.32 : 93744.8	-3.07 : 93743.7	-2.89 : 93738.2	-2.43 : 93740.4	-1.31 : 93739.3	-1.21 : 93741.5	-1.12 : 93745.9	-0.883 : 93746.10	-0.516 : 93737.1	71769	0	0	NaN	1	1	0	0.530961	0	0	NaN	NaN	0
ENSMUSG00000031755	BBS2		BBS2	A	Bardet-Biedl syndrome 2	cytoplasm|motile cilium|BBSome|ciliary basal body|ciliary membrane|	sperm axoneme assembly|visual perception|protein localization|negative regulation of gene expression|artery smooth muscle contraction|striatum development|hippocampus development|cerebral cortex development|adult behavior|melanosome transport|protein localization to organelle|nonmotile primary cilium assembly|negative regulation of appetite by leptin-mediated signaling pathway|negative regulation…	RNA polymerase II repressing transcription factor binding|protein binding|	10	0	0	0.889	7.48e-08	1.19e-08	-2.94	83.6	1e-05	-4.13	-1.93	-3.2 : 200780.1	-2.43 : 200783.4	-2.21 : 200782.3	-2.2 : 200789.10	-1.85 : 200786.7	-1.83 : 200784.5	-1.52 : 200788.9	-1.24 : 200785.6	-0.922 : 200787.8	-0.891 : 200781.2	67378	0	0	NaN	1	1	0	0.449539	0	0	-1.30214	0	0
ENSMUSG00000025235	BBS4		BBS4	B	Bardet-Biedl syndrome 4	pericentriolar material|centrosome|centriole|cilium|nonmotile primary cilium|motile cilium|centriolar satellite|BBSome|ciliary basal body|ciliary membrane|	microtubule cytoskeleton organization|mitotic cytokinesis|neural tube closure|retina homeostasis|heart looping|negative regulation of systemic arterial blood pressure|spermatid development|visual perception|sensory perception of smell|metabolic process|negative regulation of gene expression|protein transport|dendrite development|regulation of lipid metabolic process|striatum development|hippocamp…	RNA polymerase II repressing transcription factor binding|microtubule motor activity|protein binding|dynactin binding|alpha-tubulin binding|beta-tubulin binding|	10	-1.1	1.04	0.774	2.95e-05	5.1e-06	-3.87	53.6	1e-05	-5.79	-1.94	-4.0 : 196289.8	-2.4 : 196283.2	-1.91 : 196288.7	-1.43 : 196285.4	-1.29 : 196290.9	-1.14 : 196291.10	-0.841 : 196284.3	-0.642 : 196287.6	-0.452 : 196286.5	0.695 : 196282.1	102774	0	0	NaN	1	1	0	0.706953	0	1	-3.43766	0	0
ENSMUSG00000063145	BBS5		BBS5	A	Bardet-Biedl syndrome 5	intracellular|cytoplasm|BBSome|ciliary basal body|ciliary membrane|	heart looping|visual perception|protein transport|melanosome transport|cilium assembly|motile cilium assembly|response to stimulus|	RNA polymerase II repressing transcription factor binding|protein binding|phosphatidylinositol-3-phosphate binding|	10	0	0	0.889	6.82e-06	1.63e-05	-3.28	68.2	1e-05	-5.18	-2.7	-3.45 : 10851.1	-3.35 : 10858.8	-1.97 : 10853.3	-1.92 : 10859.9	-0.991 : 10857.7	-0.727 : 10860.10	-0.597 : 10852.2	-0.385 : 10855.5	-0.384 : 10856.6	-0.00906 : 10854.4	72569	0	0	NaN	1	1	0	0.835792	1	0	-3.15873	0	0
ENSMUSG00000035919	BBS9		BBS9	A	Bardet-Biedl syndrome 9	cytoplasm|microtubule organizing center|cilium|BBSome|ciliary membrane|	visual perception|protein transport|cell projection organization|fat cell differentiation|response to stimulus|	molecular_function|protein binding|	10	-0.2	0.182	0.823	4.04e-05	1.49e-05	-2.93	65.6	1e-05	-4.53	-2.33	-3.17 : 74461.5	-2.94 : 74465.9	-2.57 : 74463.7	-1.83 : 74464.8	-1.77 : 74466.10	-1.06 : 74459.3	-1.02 : 74460.4	-0.849 : 74462.6	-0.0956 : 74457.1	0.265 : 74458.2	319845	0	0	NaN	1	1	0	0.8075	1	0	-1.07531	0	0
ENSMUSG00000047248	C2CD3		C2CD3	A	C2 calcium-dependent domain containing 3	centrosome|centriole|cell projection|	in utero embryonic development|heart looping|brain development|regulation of smoothened signaling pathway|protein processing|neural tube development|neural plate axis specification|regulation of proteolysis|nonmotile primary cilium assembly|embryonic digit morphogenesis|	None	10	0	0	0.889	2.02e-06	1.91e-05	-3.56	59.3	1e-05	-5.31	-2.53	-3.76 : 119506.6	-3.01 : 119501.1	-2.77 : 119502.2	-2.4 : 119504.4	-1.69 : 119505.5	-1.41 : 119508.8	-0.914 : 119509.9	-0.432 : 119503.3	-0.371 : 119510.10	-0.113 : 119507.7	277939	0	0	NaN	1	1	0	0.839201	1	0	-8.12988	1	0
ENSMUSG00000028745	CAPZB		CAPZB	B	capping protein (actin filament) muscle Z-line, beta	acrosomal vesicle|cytosol|cytoskeleton|F-actin capping protein complex|intercalated disc|actin cytoskeleton|membrane|Z disc|lamellipodium|cortical cytoskeleton|extracellular vesicular exosome|WASH complex|	cellular component movement|cytoskeleton organization|blood coagulation|regulation of cell morphogenesis|lamellipodium assembly|actin cytoskeleton organization|negative regulation of microtubule polymerization|neuron projection development|muscle fiber development|barbed-end actin filament capping|regulation of protein kinase C signaling|	actin binding|beta-tubulin binding|actin filament binding|	10	-1.9	36.3	0.0238	0.000105	3.31e-05	-3.34	63.6	1e-05	-5.07	-2.7	-3.48 : 30325.4	-3.19 : 30329.8	-2.77 : 30328.7	-2.07 : 30327.6	-0.812 : 30331.10	-0.667 : 30322.1	-0.665 : 30330.9	-0.589 : 30326.5	0.028 : 30323.2	0.181 : 30324.3	12345	0	0	NaN	NaN	1	0	0.36856	0	0	-0.904721	0	0
ENSMUSG00000022428	CBY1		CBY1	A	chibby homolog 1 (Drosophila)	nucleus|trans-Golgi network|nuclear speck|	protein localization|negative regulation of Wnt signaling pathway|cilium assembly|fat cell differentiation|negative regulation of transcription, DNA-templated|cardiac muscle cell differentiation|negative regulation of canonical Wnt signaling pathway|	protein binding|beta-catenin binding|identical protein binding|	10	-0.1	0.0187	0.882	6.2e-05	6.22e-05	-3.27	55.9	1e-05	-4.86	-1.91	-3.48 : 95563.4	-2.4 : 95562.3	-1.99 : 95565.6	-1.62 : 95560.1	-1.35 : 95569.10	-1.35 : 95561.2	-0.716 : 95566.7	-0.523 : 95567.8	-0.0898 : 95568.9	0.28 : 95564.5	73739	0	0	NaN	1	1	0	0.457278	0	0	1.27647	0	0
ENSMUSG00000020024	CCDC41	CEP83	CEP83	D	N/A	None	None	None	10	-0.3	2.58	0.739	1.68e-05	3.49e-05	-5.46	58.7	1e-05	-8.98	-3.28	-5.6 : 122588.9	-3.15 : 122582.3	-2.13 : 122586.7	-1.48 : 122581.2	-1.3 : 122583.4	-1.23 : 122587.8	-1.22 : 122580.1	-0.75 : 122589.10	-0.24 : 122585.6	0.166 : 122584.5	77048	0	0	NaN	1	1	0	0.924541	1	0	-13.144	1	0
ENSMUSG00000011960	CCNT1		CCNT1	B	cyclin T1	nucleus|nucleoplasm|positive transcription elongation factor complex b|	regulation of cyclin-dependent protein serine/threonine kinase activity|transcription, DNA-templated|transcription from RNA polymerase II promoter|transcription initiation from RNA polymerase II promoter|transcription elongation from RNA polymerase II promoter|protein phosphorylation|cell cycle|transforming growth factor beta receptor signaling pathway|gene expression|viral process|positive regul…	DNA binding|chromatin binding|protein binding|snRNA binding|protein kinase binding|transcription regulatory region DNA binding|	10	-0.8	18.5	0.191	1.13e-07	4.23e-08	-2.75	55.3	1e-05	-3.97	-2.12	-2.88 : 213068.4	-2.81 : 213074.10	-2.15 : 213066.2	-1.93 : 213069.5	-1.91 : 213071.7	-1.23 : 213065.1	-1.11 : 213073.9	-0.851 : 213072.8	-0.777 : 213070.6	-0.581 : 213067.3	12455	0	0	NaN	NaN	1	0	0.455767	0	0	-7.49278	0	0
ENSMUSG00000021483	CDK20		CDK20	B	cyclin-dependent kinase 20	nucleus|cytoplasm|cilium|	protein phosphorylation|cell cycle|multicellular organismal development|cell division|regulation of cell cycle|	cyclin-dependent protein serine/threonine kinase activity|protein binding|ATP binding|	10	-0.2	0.588	0.837	1.69e-06	3.31e-05	-3.17	58.4	1e-05	-4.5	-1.62	-3.33 : 70125.7	-2.14 : 70119.1	-1.87 : 70121.3	-1.66 : 70123.5	-1.44 : 70120.2	-1.39 : 70122.4	-0.95 : 70127.9	-0.59 : 70128.10	-0.31 : 70126.8	-0.117 : 70124.6	105278	0	0	NaN	NaN	1	0	0.713897	1	0	-0.536304	0	0
ENSMUSG00000035790	CEP19		CEP19	A	centrosomal protein 19kDa	spindle pole|centriole|	None	None	10	-1.3	4.61	0.368	5.75e-05	0.000207	-4.37	52.7	1e-05	-7.16	-2.71	-4.54 : 211539.5	-2.91 : 211542.8	-2.83 : 211540.6	-1.38 : 211536.2	-1.18 : 211535.1	-1.16 : 211544.10	-0.941 : 211538.4	-0.309 : 211543.9	-0.0346 : 211541.7	0.115 : 211537.3	66994	0	0	NaN	NaN	1	0	0.813273	1	0	NaN	NaN	0
ENSMUSG00000014232	CLUAP1		CLUAP1	C	clusterin associated protein 1	nucleus|cilium|intracellular membrane-bounded organelle|	cell projection organization|	protein binding|	7	-0.4	2.13	0.763	0.000367	0.000214	-4.14	73.8	1e-05	-6.93	-3.37	-4.2 : 206856.5	-3.73 : 206855.4	-2.8 : 206857.6	-1.72 : 206859.8	-0.709 : 206860.9	-0.655 : 206861.10	0.136 : 206858.7				76779	4	0	NaN	1	1	0	0.899128	1	0	-7.15278	0	0
ENSMUSG00000061589	DOT1L		DOT1L	B	DOT1-like histone H3K79 methyltransferase	nucleus|	histone lysine methylation|histone lysine methylation|regulation of JAK-STAT cascade|regulation of transcription regulatory region DNA binding|	DNA binding|protein binding|transcription factor binding|histone-lysine N-methyltransferase activity|	10	-0.2	0.72	0.818	0.000453	0.000198	-3.68	55.1	1e-05	-5.67	-2.48	-3.81 : 105536.2	-2.98 : 105539.5	-2.09 : 105543.9	-1.71 : 105537.3	-1.37 : 105541.7	-1.17 : 105542.8	-0.684 : 105540.6	-0.386 : 105544.10	0.119 : 105538.4	0.526 : 105535.1	208266	0	0	NaN	NaN	1	0	0.27899	0	0	-0.844004	0	0
ENSMUSG00000047193	DYNC2H1		DYNC2H1	C	dynein, cytoplasmic 2, heavy chain 1	Golgi apparatus|cytosol|microtubule|plasma membrane|dynein complex|motile primary cilium|apical part of cell|extracellular vesicular exosome|	ATP catabolic process|microtubule-based movement|Golgi organization|determination of left/right symmetry|asymmetric protein localization|dorsal/ventral pattern formation|protein processing|antigen processing and presentation of exogenous peptide antigen via MHC class II|spinal cord motor neuron differentiation|embryonic limb morphogenesis|forebrain development|cilium assembly|	motor activity|microtubule motor activity|ATP binding|ATPase activity|	10	-0.4	2.78	0.711	3.82e-06	1.92e-07	-4.54	219	1e-05	-6.5	-3.92	-4.64 : 187487.9	-4.37 : 187479.1	-4.15 : 187488.10	-3.26 : 187486.8	-3.24 : 187483.5	-3.23 : 187482.4	-3.18 : 187480.2	-2.83 : 187484.6	-2.63 : 187481.3	0.222 : 187485.7	110350	0	0	NaN	1	1	0	0.81776	1	0	-2.34358	0	0
ENSMUSG00000024253	DYNC2LI1		DYNC2LI1	A	dynein, cytoplasmic 2, light intermediate chain 1	cytosol|axonemal dynein complex|cytoplasmic microtubule|axoneme|intraciliary transport particle|motile primary cilium|ciliary basal body|apical part of cell|primary cilium|	determination of left/right symmetry|metabolic process|antigen processing and presentation of exogenous peptide antigen via MHC class II|cilium assembly|	motor activity|protein binding|	10	0	0	0.889	2.79e-07	1.53e-06	-5.95	101	1e-05	-9.42	-4.41	-6.11 : 167912.1	-4.38 : 167916.5	-3.53 : 167915.4	-2.76 : 167921.10	-1.86 : 167913.2	-1.72 : 167919.8	-1.35 : 167918.7	-0.666 : 167920.9	-0.611 : 167914.3	-0.313 : 167917.6	213575	0	0	NaN	1	1	0	0.83387	1	0	-1.96561	0	0
ENSMUSG00000009013	DYNLL1		DYNLL1	A	dynein, light chain, LC8-type 1	kinetochore|nucleus|cytoplasm|mitochondrion|centrosome|cytosol|cytoplasmic dynein complex|microtubule|plasma membrane|COP9 signalosome|membrane|extracellular vesicular exosome|mitotic spindle|	G2/M transition of mitotic cell cycle|mitotic cell cycle|transcription, DNA-templated|regulation of transcription, DNA-templated|transport|apoptotic process|microtubule-based process|female gamete generation|anatomical structure morphogenesis|viral process|antigen processing and presentation of exogenous peptide antigen via MHC class II|substantia nigra development|actin cytoskeleton organization…	motor activity|protein binding|protein C-terminus binding|enzyme binding|protein domain specific binding|nitric-oxide synthase regulator activity|protein homodimerization activity|	10	-1.9	34.1	0.0206	6.42e-08	1.45e-08	-4.75	163	1e-05	-6.78	-4.29	-4.9 : 34520.6	-4.82 : 34522.8	-4.68 : 34517.3	-4.02 : 34519.5	-3.56 : 34515.1	-3.12 : 34524.10	-2.79 : 34523.9	-2.33 : 34521.7	-0.935 : 34518.4	-0.846 : 34516.2	56455	0	0	NaN	1	1	0	0.354207	0	0	-3.77376	0	0
ENSMUSG00000092074	DYNLT1A		DYNLT1	C	dynein light chain Tctex-type 1A	cellular_component|	biological_process|	identical protein binding|	10	-2.1	71	0.00046	6.32e-08	1.65e-08	-3.08	111	1e-05	-4.47	-2.41	-3.23 : 88664.4	-3.08 : 88670.10	-2.37 : 88663.3	-2.28 : 88669.9	-2.16 : 88665.5	-2.08 : 88662.2	-1.5 : 88661.1	-1.42 : 88667.7	-1.38 : 88666.6	-0.785 : 88668.8	100310872	10	0	NaN	1	1	0	0.23535	0	0	NaN	NaN	NaN
ENSMUSG00000000579	DYNLT1C		DYNLT1	C	dynein light chain Tctex-type 1C	cellular_component|	biological_process|	identical protein binding|	10	-2.2	70.7	0.00046	7.32e-08	1.65e-08	-3.05	86.1	1e-05	-4.2	-1.99	-3.23 : 103254.4	-2.37 : 103253.3	-2.22 : 103259.9	-2.16 : 103260.10	-2.16 : 103255.5	-2.08 : 103252.2	-1.5 : 103251.1	-1.42 : 103256.6	-0.815 : 103258.8	-0.785 : 103257.7	100040563	10	0	NaN	NaN	1	0	0.23535	0	0	NaN	NaN	NaN
ENSMUSG00000095677	DYNLT1F		DYNLT1	C	dynein light chain Tctex-type 1F	cellular_component|	biological_process|	identical protein binding|	10	-2.1	71	0.00046	6.32e-08	1.65e-08	-3.08	111	1e-05	-4.47	-2.41	-3.23 : 155374.4	-3.08 : 155380.10	-2.37 : 155373.3	-2.28 : 155379.9	-2.16 : 155375.5	-2.08 : 155372.2	-1.5 : 155371.1	-1.42 : 155377.7	-1.38 : 155376.6	-0.785 : 155378.8	100040531	10	0	NaN	NaN	1	0	0.23535	0	0	NaN	NaN	NaN
ENSMUSG00000079658	ELOC	TCEB1	ELOC	B	transcription elongation factor B (SIII), polypeptide 1 (15kDa, elongin C)	nucleoplasm|cytosol|VCB complex|elongin complex|	regulation of transcription from RNA polymerase II promoter|transcription from RNA polymerase II promoter|transcription elongation from RNA polymerase II promoter|ubiquitin-dependent protein catabolic process|gene expression|viral process|positive regulation of transcription elongation from RNA polymerase II promoter|positive regulation of viral transcription|regulation of transcription from RNA …	protein binding|protein complex binding|	10	-2	41.4	0.0176	3.11e-07	3.05e-07	-3.07	76.4	1e-05	-4.48	-2.45	-3.18 : 187117.9	-3.13 : 187112.4	-2.43 : 187109.1	-2.26 : 187113.5	-2.23 : 187115.7	-1.7 : 187111.3	-1.44 : 187114.6	-1.32 : 187118.10	-1.22 : 187116.8	-0.173 : 187110.2	67923	0	0	NaN	NaN	1	0	NaN	NaN	NaN	NaN	NaN	0
ENSMUSG00000029122	EVC		EVC	D	Ellis van Creveld syndrome	cytoplasm|cilium|integral component of membrane|ciliary basal body|ciliary membrane|	skeletal system development|endochondral bone growth|smoothened signaling pathway|muscle organ development|positive regulation of smoothened signaling pathway|cartilage development|	None	10	0	0	0.955	2.5e-05	7.01e-05	-4.55	65	1e-05	-7.03	-2.82	-4.71 : 165324.2	-3.34 : 165332.10	-2.79 : 165323.1	-1.61 : 165325.3	-1.06 : 165326.4	-0.851 : 165329.7	-0.822 : 165330.8	-0.639 : 165327.5	-0.0494 : 165328.6	-0.0159 : 165331.9	59056	0	0	NaN	1	1	0	0.59631	0	0	-3.20581	0	0
ENSMUSG00000050248	EVC2		EVC2	C	Ellis van Creveld syndrome 2	nucleus|nucleus|cytoplasm|cytoskeleton|cilium|integral component of membrane|ciliary membrane|	smoothened signaling pathway|	None	10	-0.6	3.53	0.651	2.02e-07	6.06e-07	-4.17	62.7	1e-05	-5.86	-2	-4.29 : 19271.8	-2.41 : 19269.6	-1.94 : 19267.4	-1.7 : 19270.7	-1.46 : 19265.2	-1.44 : 19268.5	-0.948 : 19273.10	-0.927 : 19266.3	-0.613 : 19264.1	-0.364 : 19272.9	68525	0	0	NaN	1	1	0	0.523072	0	0	-1.36934	0	0
ENSMUSG00000028218	FAM92A		FAM92A	A	family with sequence similarity 92, member A	cellular_component|	biological_process|	protein binding|	10	-0.3	0.276	0.799	0.000512	0.0012	-3.91	52.1	1e-05	-6.87	-3.3	-4.06 : 169220.3	-3.82 : 169227.10	-3.26 : 169225.8	-2.27 : 169226.9	-0.537 : 169218.1	-0.448 : 169219.2	-0.385 : 169223.6	-0.297 : 169224.7	0.137 : 169222.5	0.147 : 169221.4	68099	0	0	NaN	NaN	1	0	NaN	NaN	NaN	-5.14768	0	0
ENSMUSG00000032633	FLCN		FLCN	A	folliculin	nucleus|cytoplasm|plasma membrane|midbody|cell-cell contact zone|	negative regulation of transcription from RNA polymerase II promoter|negative regulation of transcription from RNA polymerase II promoter|in utero embryonic development|regulation of protein phosphorylation|positive regulation of protein phosphorylation|cell-cell junction assembly|positive regulation of gene expression|negative regulation of gene expression|negative regulation of mitochondrion or…	protein binding|protein complex binding|	10	0.8	27.2	0.048	1.25e-06	9.57e-06	-3.15	107	1e-05	-4.69	-2.69	-3.34 : 41828.4	-3.22 : 41830.6	-2.99 : 41825.1	-2.97 : 41833.9	-2.7 : 41834.10	-2.17 : 41832.8	-1.76 : 41831.7	-1.08 : 41826.2	-0.211 : 41827.3	-0.193 : 41829.5	216805	0	0	NaN	NaN	1	0	0.276023	0	0	-9.5117	0	0
ENSMUSG00000022677	FOPNL		FOPNL	A	FGFR1OP N-terminal like	nucleus|centrosome|motile cilium|centriolar satellite|ciliary basal body|	microtubule anchoring|cilium assembly|	None	10	0	0	0.889	4.48e-07	9.57e-06	-4.99	127	1e-05	-7.3	-3.79	-5.16 : 143630.4	-4.14 : 143629.3	-3.67 : 143627.1	-3.27 : 143632.6	-3.21 : 143634.8	-2.12 : 143635.9	-1.38 : 143628.2	-1.08 : 143631.5	-0.39 : 143636.10	-0.252 : 143633.7	66086	0	0	NaN	1	1	0	0.391136	0	0	NaN	NaN	0
ENSMUSG00000011658	FUZ		FUZ	C	fuzzy planar cell polarity protein	cytoplasm|cytoskeleton|extracellular vesicular exosome|	establishment of planar polarity|neural tube closure|neural tube closure|hair follicle development|negative regulation of cell proliferation|regulation of smoothened signaling pathway|embryonic body morphogenesis|protein transport|spinal cord dorsal/ventral patterning|negative regulation of cell migration|nonmotile primary cilium assembly|cilium assembly|positive regulation of cilium assembly|emb…	None	10	-0.2	0.578	0.905	7.03e-05	8.73e-06	-5.88	181	1e-05	-8.72	-5.32	-5.91 : 148329.7	-5.89 : 148325.3	-5.02 : 148323.1	-3.71 : 148326.4	-3.44 : 148328.6	-3.2 : 148332.10	-2.87 : 148330.8	-1.17 : 148327.5	-0.0736 : 148331.9	0.61 : 148324.2	70300	0	0	NaN	1	1	0	0.515677	0	0	0.427885	0	0
ENSMUSG00000052957	GAS1		GAS1	B	growth arrest-specific 1	plasma membrane|integral component of membrane|anchored component of plasma membrane|	positive regulation of mesenchymal cell proliferation|cell cycle arrest|axon guidance|regulation of smoothened signaling pathway|negative regulation of protein processing|programmed cell death|cerebellum morphogenesis|dorsal/ventral neural tube patterning|negative regulation of cell growth|cellular response to vascular endothelial growth factor stimulus|outer ear morphogenesis|middle ear morphoge…	protein binding|	10	0	0	0.942	8.1e-07	3.52e-06	-4.52	101	1e-05	-6.44	-3.01	-4.64 : 182394.9	-3.4 : 182388.3	-3.18 : 182389.4	-2.64 : 182392.7	-2.13 : 182387.2	-1.83 : 182391.6	-1.56 : 182393.8	-0.887 : 182395.10	-0.486 : 182390.5	-0.0996 : 182386.1	14451	0	0	NaN	1	1	0	0.31999	0	0	-3.49722	0	0
ENSMUSG00000025407	GLI1		GLI1	A	GLI family zinc finger 1	nucleus|cytoplasm|cytosol|intracellular membrane-bounded organelle|primary cilium|	osteoblast differentiation|transcription from RNA polymerase II promoter|smoothened signaling pathway|smoothened signaling pathway|spermatogenesis|ventral midline development|positive regulation of cell proliferation|regulation of smoothened signaling pathway|epidermal cell differentiation|dorsal/ventral pattern formation|proximal/distal pattern formation|cerebellar cortex morphogenesis|smoothene…	DNA binding|chromatin binding|RNA polymerase II distal enhancer sequence-specific DNA binding transcription factor activity|protein binding|microtubule binding|transcription regulatory region DNA binding|metal ion binding|	10	-0.6	2.53	0.519	1.73e-07	4.5e-07	-2.98	81	1e-05	-4.45	-2.39	-3.2 : 193142.3	-3.05 : 193146.7	-2.61 : 193141.2	-1.87 : 193148.9	-1.85 : 193147.8	-1.61 : 193149.10	-1.4 : 193145.6	-0.936 : 193144.5	-0.647 : 193143.4	-0.403 : 193140.1	14632	0	0	NaN	1	1	0	0.403713	0	0	-2.06695	0	1
ENSMUSG00000024858	GRK2		GRK2	B	adrenergic, beta, receptor kinase 1	cytoplasm|cytosol|plasma membrane|membrane|membrane|	desensitization of G-protein coupled receptor protein signaling pathway|negative regulation of the force of heart contraction by chemical signal|signal transduction|epidermal growth factor receptor signaling pathway|activation of phospholipase C activity|G-protein coupled acetylcholine receptor signaling pathway|tachykinin receptor signaling pathway|heart development|fibroblast growth factor rece…	protein kinase activity|G-protein coupled receptor kinase activity|protein binding|ATP binding|alpha-2A adrenergic receptor binding|Edg-2 lysophosphatidic acid receptor binding|beta-adrenergic receptor kinase activity|	10	-0.4	2.07	0.659	9.13e-08	2.08e-07	-5.16	166	1e-05	-7.3	-4.6	-5.27 : 85066.3	-5.07 : 85071.8	-4.8 : 85073.10	-4.78 : 85068.5	-3.66 : 85069.6	-2.84 : 85067.4	-2.66 : 85070.7	-1.95 : 85065.2	-1.37 : 85064.1	-0.436 : 85072.9	110355	0	0	NaN	1	1	0	NaN	NaN	NaN	NaN	NaN	0
ENSMUSG00000025793	HGS		HGS	B	hepatocyte growth factor-regulated tyrosine kinase substrate	cytoplasm|endosome|early endosome|cytosol|secretory granule|early endosome membrane|multivesicular body membrane|intracellular membrane-bounded organelle|extracellular vesicular exosome|	intracellular protein transport|signal transduction|epidermal growth factor receptor signaling pathway|negative regulation of cell proliferation|endosome to lysosome transport|endosomal transport|endosomal transport|negative regulation of epidermal growth factor receptor signaling pathway|regulation of protein catabolic process|negative regulation of JAK-STAT cascade|membrane organization|	protein binding|protein domain specific binding|metal ion binding|	10	0.4	6.15	0.395	1.74e-05	4.8e-07	-2	53.6	1e-05	-3	-1.54	-2.17 : 154275.5	-2.06 : 154271.1	-1.94 : 154280.10	-1.61 : 154273.3	-1.58 : 154272.2	-1.58 : 154277.7	-1.02 : 154278.8	-0.889 : 154276.6	-0.846 : 154274.4	0.807 : 154279.9	15239	0	0	NaN	NaN	1	0	0.19298	0	0	-0.732427	0	0
ENSMUSG00000063172	HSPB11		HSPB11	C	heat shock protein family B (small), member 11	cilium|intraciliary transport particle B|extracellular vesicular exosome|	response to stress|cell adhesion|protein transport|	metal ion binding|	8	0.7	3.64	0.643	3.21e-05	1.45e-05	-3.99	75.3	1e-05	-6.27	-2.61	-4.08 : 95058.7	-3.0 : 95057.6	-1.94 : 95056.5	-1.52 : 95054.3	-1.36 : 95053.2	-1.14 : 95052.1	-1.11 : 95055.4	0.0424 : 95059.8			72938	0	0	NaN	1	1	0	0.72965	1	0	0.583429	0	0
ENSMUSG00000009828	ICK		ICK	B	intestinal cell (MAK-like) kinase	nucleus|cytosol|	protein phosphorylation|signal transduction|multicellular organismal development|intracellular signal transduction|regulation of cell cycle|	magnesium ion binding|protein serine/threonine kinase activity|cyclin-dependent protein serine/threonine kinase activity|protein binding|ATP binding|	10	-0.1	0.0678	0.928	4.63e-06	8.06e-07	-3.7	75.6	1e-05	-5.24	-2.56	-3.85 : 70384.6	-2.93 : 70387.9	-2.75 : 70379.1	-2.75 : 70385.7	-2.39 : 70388.10	-1.77 : 70381.3	-1.75 : 70380.2	-0.922 : 70386.8	-0.69 : 70383.5	0.185 : 70382.4	56542	0	0	NaN	NaN	1	0	0.526793	0	0	-4.42231	1	0
ENSMUSG00000030323	IFT122		IFT122	B	intraflagellar transport 122	cytoplasm|cytoskeleton|membrane|intraciliary transport particle A|photoreceptor connecting cilium|primary cilium|	neural tube closure|embryonic body morphogenesis|embryonic heart tube development|intraciliary retrograde transport|embryonic digit morphogenesis|negative regulation of smoothened signaling pathway|camera-type eye morphogenesis|limb development|cilium morphogenesis|ciliary receptor clustering involved in smoothened signaling pathway|smoothened signaling pathway involved in dorsal/ventral neural t…	protein binding|	10	0	0	0.942	8.74e-06	3.13e-07	-3.39	77.7	1e-05	-4.87	-2.46	-3.55 : 28090.3	-2.88 : 28092.5	-2.71 : 28097.10	-2.24 : 28093.6	-2.17 : 28088.1	-1.58 : 28089.2	-1.42 : 28091.4	-1.39 : 28094.7	-1.18 : 28096.9	0.376 : 28095.8	81896	0	0	NaN	1	1	0	0.690565	0	1	-6.53273	1	1
ENSMUSG00000038564	IFT172		IFT172	B	intraflagellar transport 172	cilium|	neural tube formation|smoothened signaling pathway|determination of left/right symmetry|dorsal/ventral pattern formation|protein processing|spinal cord motor neuron differentiation|cilium assembly|cilium assembly|	None	10	0.4	3.95	0.516	0.000406	3.56e-05	-4.09	78.6	1e-05	-6.21	-3.15	-4.21 : 105875.6	-3.6 : 105877.8	-2.72 : 105876.7	-1.83 : 105871.2	-1.77 : 105872.3	-1.1 : 105870.1	-1.07 : 105879.10	-0.577 : 105874.5	0.204 : 105873.4	0.403 : 105878.9	67661	0	0	NaN	1	1	0	0.816251	1	0	0.161855	0	0
ENSMUSG00000001105	IFT20		IFT20	C	intraflagellar transport 20	Golgi apparatus|centrosome|centriole|cilium|intraciliary transport particle B|dendrite terminus|extracellular vesicular exosome|	protein localization to Golgi apparatus|cilium assembly|centrosome localization|regulation of cilium assembly|regulation of autophagic vacuole assembly|	protein binding|	10	0.7	2.86	0.705	1.57e-05	1.32e-05	-3.76	101	1e-05	-5.42	-2.64	-3.88 : 211627.3	-3.04 : 211634.10	-2.87 : 211632.8	-2.52 : 211630.6	-2.28 : 211631.7	-1.66 : 211625.1	-1.6 : 211626.2	-0.862 : 211633.9	-0.179 : 211628.4	0.191 : 211629.5	55978	0	0	NaN	1	1	0	0.563881	0	0	-1.01169	0	0
ENSMUSG00000016637	IFT27		IFT27	C	intraflagellar transport 27	intraciliary transport particle B|motile cilium|	small GTPase mediated signal transduction|	GTP binding|	10	-0.3	1.87	0.785	0.000126	5.07e-05	-4.02	89.2	1e-05	-6.17	-3.32	-4.13 : 21645.4	-3.86 : 21643.2	-2.52 : 21647.6	-2.47 : 21650.9	-2.44 : 21649.8	-1.69 : 21651.10	-0.964 : 21646.5	-0.526 : 21648.7	0.0798 : 21642.1	0.234 : 21644.3	67042	0	0	NaN	1	1	0	0.582094	0	0	-8.77071	1	0
ENSMUSG00000017858	IFT52		IFT52	B	intraflagellar transport 52	intraciliary transport particle B|motile cilium|photoreceptor connecting cilium|dendrite terminus|	neural tube formation|heart looping|smoothened signaling pathway|dorsal/ventral pattern formation|embryonic digit morphogenesis|positive regulation of proteolysis|	protein C-terminus binding|	10	-0.1	0.278	0.887	0.00061	1.43e-05	-3.06	61.7	1e-05	-4.63	-2.44	-3.2 : 207443.2	-3.07 : 207447.6	-2.45 : 207445.4	-2.03 : 207442.1	-1.97 : 207449.8	-1.23 : 207444.3	-0.824 : 207450.9	-0.791 : 207451.10	0.348 : 207446.5	0.429 : 207448.7	245866	0	0	NaN	1	1	0	0.683663	0	1	-2.82122	0	0
ENSMUSG00000032965	IFT57		IFT57	B	intraflagellar transport 57	Golgi apparatus|photoreceptor connecting cilium|ciliary basal body|dendrite terminus|	transcription, DNA-templated|regulation of transcription, DNA-templated|apoptotic process|activation of cysteine-type endopeptidase activity involved in apoptotic process|regulation of apoptotic process|	DNA binding|protein binding|	10	-0.2	0.0119	0.94	5.18e-08	6.07e-09	-3.97	129	1e-05	-5.48	-2.96	-4.12 : 78303.5	-3.25 : 78306.8	-3.19 : 78307.9	-3.15 : 78301.3	-3.03 : 78300.2	-3.01 : 78299.1	-2.0 : 78308.10	-1.63 : 78304.6	-1.46 : 78305.7	-1.41 : 78302.4	73916	0	0	NaN	1	1	0	0.612885	0	0	-6.39969	0	1
ENSMUSG00000027778	IFT80		IFT80	A	intraflagellar transport 80	cytoplasm|centrosome|cilium|	osteoblast differentiation|chondrocyte differentiation|smoothened signaling pathway|cilium assembly|positive regulation of smoothened signaling pathway|bone morphogenesis|negative regulation of non-canonical Wnt signaling pathway|	None	10	-0.4	1.19	0.651	6.26e-08	1.04e-08	-5.43	142	1e-05	-7.8	-4.79	-5.6 : 102382.3	-5.4 : 102384.5	-3.63 : 102381.2	-3.38 : 102389.10	-2.8 : 102386.7	-2.75 : 102387.8	-2.42 : 102388.9	-1.85 : 102383.4	-0.944 : 102380.1	-0.938 : 102385.6	68259	0	0	NaN	1	1	0	0.753568	1	0	-2.26284	0	0
ENSMUSG00000029469	IFT81		IFT81	A	intraflagellar transport 81	centrosome|cilium|intraciliary transport particle B|intraciliary transport particle B|motile cilium|	spermatogenesis|intraciliary transport involved in cilium morphogenesis|cilium assembly|	tubulin binding|	10	-0.2	0.173	0.826	6.46e-05	8.33e-06	-5.39	79.7	1e-05	-8.11	-4.59	-5.55 : 120630.7	-5.11 : 120628.5	-2.05 : 120625.2	-1.84 : 120624.1	-1.6 : 120631.8	-1.53 : 120627.4	-1.33 : 120626.3	-1.2 : 120633.10	-0.0811 : 120629.6	0.455 : 120632.9	12589	0	0	NaN	1	1	0	0.82449	1	0	-1.75682	0	0
ENSMUSG00000040040	IFT88		IFT88	A	intraflagellar transport 88	centriole|cilium|cilium|axoneme|intraciliary transport particle B|motile primary cilium|motile cilium|photoreceptor connecting cilium|ciliary basal body|apical part of cell|	eye development|in utero embryonic development|epithelial cell morphogenesis|smoothened signaling pathway|determination of left/right symmetry|protein localization|anterior/posterior pattern specification|protein processing|spinal cord dorsal/ventral patterning|telencephalon development|regulation of odontogenesis of dentin-containing tooth|embryonic digit morphogenesis|positive regulation of pro…	None	10	0.1	0.109	0.847	3.84e-07	1.53e-06	-4.99	76.7	1e-05	-7.4	-3.86	-5.16 : 148249.7	-4.3 : 148246.4	-2.35 : 148243.1	-2.31 : 148247.5	-2.25 : 148245.3	-1.68 : 148248.6	-0.699 : 148250.8	-0.64 : 148244.2	-0.611 : 148251.9	-0.296 : 148252.10	21821	0	0	NaN	1	1	0	0.905416	1	0	-6.1648	1	1
ENSMUSG00000032293	IREB2		IREB2	A	iron-responsive element binding protein 2	cytoplasm|mitochondrion|cytosol|	regulation of translation|protoporphyrinogen IX biosynthetic process|iron ion transport|cellular iron ion homeostasis|aging|post-embryonic development|response to iron(II) ion|osteoclast differentiation|response to retinoic acid|erythrocyte homeostasis|intestinal absorption|cellular response to hypoxia|	RNA binding|RNA binding|protein binding|iron-responsive element binding|metal ion binding|4 iron, 4 sulfur cluster binding|	10	-1.9	47.6	0.00812	1.93e-07	1.83e-07	-1.57	59	1e-05	-2.41	-1.27	-1.75 : 17950.6	-1.73 : 17954.10	-1.69 : 17948.4	-1.6 : 17945.1	-1.58 : 17952.8	-1.42 : 17951.7	-1.38 : 17949.5	-0.996 : 17947.3	-0.507 : 17953.9	-0.459 : 17946.2	64602	0	0	NaN	NaN	1	0	0.440656	0	0	-1.09995	0	NaN
ENSMUSG00000018395	KIF3A		KIF3A	B	kinesin family member 3A	centrosome|cytosol|spindle microtubule|synaptic vesicle|microtubule cytoskeleton|kinesin II complex|photoreceptor connecting cilium|neuron projection|extracellular vesicular exosome|primary cilium|	in utero embryonic development|kidney development|organelle organization|microtubule-based movement|smoothened signaling pathway|determination of left/right symmetry|heart development|blood coagulation|metabolic process|metabolic process|anterior/posterior pattern specification|antigen processing and presentation of exogenous peptide antigen via MHC class II|dorsal/ventral neural tube patterning|…	protein binding|ATP binding|microtubule binding|plus-end-directed microtubule motor activity|spectrin binding|	10	0.3	2.46	0.625	7.49e-08	2.29e-08	-6.4	93.6	1e-05	-8.97	-4.63	-6.49 : 97361.9	-4.78 : 97356.4	-2.33 : 97358.6	-2.31 : 97357.5	-2.2 : 97362.10	-1.84 : 97354.2	-1.67 : 97353.1	-1.61 : 97355.3	-0.889 : 97360.8	-0.673 : 97359.7	16568	0	0	NaN	1	1	0	0.782001	1	0	-0.141054	0	0
ENSMUSG00000027475	KIF3B		KIF3B	B	kinesin family member 3B	centrosome|cytosol|plus-end kinesin complex|spindle microtubule|microtubule cytoskeleton|membrane|kinesin II complex|midbody|extracellular vesicular exosome|	microtubule-based movement|mitotic spindle organization|mitotic centrosome separation|determination of left/right symmetry|blood coagulation|anterograde axon cargo transport|metabolic process|metabolic process|antigen processing and presentation of exogenous peptide antigen via MHC class II|membrane organization|plus-end-directed vesicle transport along microtubule|spindle assembly involved in mi…	microtubule motor activity|protein binding|ATP binding|microtubule binding|plus-end-directed microtubule motor activity|Rho GTPase binding|	10	0	0	0.942	3.84e-06	6.07e-07	-4.37	116	1e-05	-6.1	-2.96	-4.5 : 26040.5	-3.32 : 26038.3	-3.26 : 26044.9	-2.95 : 26036.1	-2.88 : 26037.2	-2.82 : 26043.8	-2.02 : 26039.4	-1.27 : 26042.7	-0.75 : 26041.6	0.176 : 26045.10	16569	0	0	NaN	1	1	0	0.48572	0	0	-2.13229	0	0
ENSMUSG00000026585	KIFAP3		KIFAP3	C	kinesin-associated protein 3	condensed nuclear chromosome|endoplasmic reticulum|centrosome|cytosol|spindle microtubule|microtubule cytoskeleton|kinesin II complex|kinesin II complex|extracellular vesicular exosome|	protein complex assembly|microtubule-based process|microtubule-based movement|signal transduction|blood coagulation|protein localization|negative regulation of cell proliferation|antigen processing and presentation of exogenous peptide antigen via MHC class II|positive regulation of calcium-dependent cell-cell adhesion|membrane organization|plus-end-directed vesicle transport along microtubule|	protein binding|kinesin binding|	10	0.3	1.58	0.811	6.6e-06	1.06e-06	-4.59	146	1e-05	-6.53	-3.64	-4.69 : 129301.7	-4.01 : 129295.1	-3.81 : 129297.3	-3.32 : 129296.2	-2.5 : 129302.8	-2.5 : 129304.10	-2.49 : 129298.4	-1.92 : 129299.5	-0.65 : 129300.6	0.288 : 129303.9	16579	0	0	NaN	1	1	0	0.610313	0	0	-3.71718	0	0
ENSMUSG00000030763	LCMT1		LCMT1	C	leucine carboxyl methyltransferase 1	None	cellular protein modification process|protein methylation|C-terminal protein methylation|negative regulation of protein complex assembly|regulation of apoptotic process|regulation of mitotic cell cycle spindle assembly checkpoint|	protein C-terminal carboxyl O-methyltransferase activity|protein binding|S-adenosylmethionine-dependent methyltransferase activity|	10	-0.4	3.48	0.656	3.72e-06	6.97e-06	-4.68	108	1e-05	-6.77	-3.38	-4.78 : 190834.9	-3.74 : 190827.2	-3.52 : 190831.6	-2.14 : 190830.5	-1.95 : 190833.8	-1.72 : 190829.4	-1.42 : 190835.10	-1.41 : 190832.7	-0.144 : 190828.3	-0.038 : 190826.1	30949	0	0	NaN	NaN	1	0	0.515397	0	0	-3.12318	0	0
ENSMUSG00000025245	LZTFL1		LZTFL1	C	leucine zipper transcription factor-like 1	cytoplasm|BBSome|	establishment of protein localization to organelle|	protein binding|identical protein binding|	10	-0.2	0.204	0.947	3.32e-06	6.58e-05	-2.94	67.9	1e-05	-4.42	-2.14	-3.09 : 170450.5	-2.58 : 170451.6	-2.41 : 170455.10	-2.09 : 170452.7	-1.57 : 170454.9	-1.52 : 170453.8	-1.43 : 170446.1	-0.231 : 170448.3	-0.223 : 170447.2	-0.171 : 170449.4	93730	0	0	NaN	1	1	0	0.85939	1	0	-0.557269	0	0
ENSMUSG00000045248	MED26		MED26	C	mediator complex subunit 26	nucleoplasm|mediator complex|	regulation of transcription from RNA polymerase II promoter|transcription initiation from RNA polymerase II promoter|gene expression|	RNA polymerase II transcription cofactor activity|DNA binding|transcription coactivator activity|protein binding|	10	-1.8	21.2	0.136	7.64e-08	1.27e-08	-3.7	101	1e-05	-5.33	-2.93	-3.85 : 6541.8	-3.51 : 6537.4	-2.57 : 6543.10	-2.12 : 6534.1	-1.92 : 6540.7	-1.9 : 6542.9	-1.78 : 6536.3	-0.877 : 6538.5	-0.864 : 6535.2	-0.855 : 6539.6	70625	0	0	NaN	NaN	1	0	0.120257	0	0	-18.4347	1	1
ENSMUSG00000027274	MKKS		MKKS	C	McKusick-Kaufman syndrome	intracellular|centrosome|cytosol|motile cilium|	heart looping|protein folding|spermatid development|determination of left/right symmetry|heart development|visual perception|sensory perception of smell|gonad development|negative regulation of gene expression|artery smooth muscle contraction|striatum development|hippocampus development|cerebral cortex development|melanosome transport|nonmotile primary cilium assembly|social behavior|negative reg…	RNA polymerase II repressing transcription factor binding|protein binding|ATP binding|unfolded protein binding|	10	-1	1.07	0.858	1.43e-07	1.68e-07	-2.79	72.9	1e-05	-4	-2.11	-2.98 : 210852.8	-2.58 : 210853.9	-2.4 : 210846.2	-1.82 : 210848.4	-1.63 : 210849.5	-1.12 : 210845.1	-1.11 : 210847.3	-0.935 : 210851.7	-0.732 : 210850.6	-0.445 : 210854.10	59030	0	0	NaN	1	1	0	0.376729	0	0	-7.78156	1	0
ENSMUSG00000034121	MKS1		MKS1	A	Meckel syndrome, type 1	cytoplasm|centrosome|membrane|TCTN-B9D complex|ciliary basal body|	cilium assembly|branching morphogenesis of an epithelial tube|cilium morphogenesis|	protein binding|	10	0	0	0.889	2.25e-06	5.81e-06	-4.34	78.9	1e-05	-6.56	-3.73	-4.52 : 9203.8	-4.29 : 9197.2	-3.96 : 9205.10	-2.73 : 9201.6	-2.71 : 9196.1	-1.78 : 9200.5	-1.53 : 9202.7	-0.523 : 9204.9	-0.449 : 9198.3	-0.0137 : 9199.4	380718	0	0	NaN	1	1	0	0.728433	1	0	-1.69773	0	0
ENSMUSG00000040586	OFD1		OFD1	B	oral-facial-digital syndrome 1	nucleus|centrosome|centriole|cytosol|cilium|microtubule cytoskeleton|membrane|centriolar satellite|ciliary basal body|	G2/M transition of mitotic cell cycle|mitotic cell cycle|cilium morphogenesis|epithelial cilium movement involved in determination of left/right asymmetry|	protein binding|alpha-tubulin binding|gamma-tubulin binding|	10	0.1	0.434	0.86	2.54e-06	2.72e-07	-4.24	146	1e-05	-6.04	-3.56	-4.38 : 79667.8	-3.95 : 79662.3	-3.77 : 79669.10	-3.28 : 79660.1	-3.09 : 79668.9	-2.57 : 79661.2	-2.41 : 79664.5	-1.56 : 79666.7	-1.37 : 79663.4	0.134 : 79665.6	237222	0	0	NaN	1	1	0	0.3718	0	0	-16.305	1	0
ENSMUSG00000002221	PAXIP1		PAXIP1	D	PAX interacting (with transcription-activation domain) protein 1	nucleus|nuclear matrix|histone methyltransferase complex|	positive regulation of histone H3-K36 methylation|vasculogenesis|DNA repair|DNA recombination|transcription, DNA-templated|response to ionizing radiation|DNA damage response, signal transduction by p53 class mediator|positive regulation of protein ubiquitination|positive regulation of histone acetylation|endothelial cell migration|positive regulation of isotype switching|histone H3-K4 methylation…	protein binding|	9	2	28.1	0.105	1.19e-05	7.25e-06	-3.69	60.3	1e-05	-5.37	-2.03	-3.89 : 20261.10	-2.53 : 20253.2	-2.39 : 20258.7	-1.77 : 20259.8	-1.63 : 20252.1	-1.55 : 20254.3	-1.44 : 20260.9	-0.779 : 20257.6	0.116 : 20256.5		55982	0	0	NaN	NaN	1	0	0.76802	1	0	-1.85036	0	0
ENSMUSG00000027835	PDCD10		PDCD10	A	programmed cell death 10	Golgi membrane|cytosol|plasma membrane|extracellular vesicular exosome|	angiogenesis|apoptotic process|positive regulation of cell proliferation|negative regulation of apoptotic process|positive regulation of MAP kinase activity|	protein binding|protein homodimerization activity|protein N-terminus binding|	10	2.5	36.1	0.0177	1.77e-05	1.19e-05	-2.11	55.5	1e-05	-3.2	-1.73	-2.3 : 73635.9	-2.26 : 73636.10	-2.12 : 73630.4	-2.03 : 73628.2	-1.82 : 73629.3	-1.79 : 73633.7	-1.31 : 73634.8	-0.92 : 73627.1	-0.4 : 73632.6	0.451 : 73631.5	56426	0	0	NaN	NaN	1	0	0.35872	0	0	-2.13847	0	0
ENSMUSG00000022064	PIBF1		PIBF1	A	progesterone immunomodulatory binding factor 1	centrosome|	None	protein binding|	10	0	0	0.889	3.25e-05	1.17e-05	-3.34	88.9	1e-05	-5.16	-2.65	-3.56 : 30056.5	-3.32 : 30059.8	-2.45 : 30055.4	-2.19 : 30060.9	-1.78 : 30053.2	-1.44 : 30052.1	-1.2 : 30058.7	-0.927 : 30061.10	-0.126 : 30057.6	0.279 : 30054.3	52023	0	0	NaN	1	1	0	0.810786	1	0	-8.60051	1	0
ENSMUSG00000043257	PIGV		PIGV	C	phosphatidylinositol glycan anchor biosynthesis, class V	endoplasmic reticulum membrane|endoplasmic reticulum membrane|integral component of membrane|	C-terminal protein lipidation|GPI anchor biosynthetic process|GPI anchor biosynthetic process|preassembly of GPI anchor in ER membrane|post-translational protein modification|cellular protein metabolic process|mannosylation|mannosylation|	mannosyltransferase activity|mannosyltransferase activity|	10	-0.8	14.1	0.231	6.73e-06	2.17e-05	-2.99	87.9	1e-05	-4.53	-2.48	-3.12 : 26632.7	-3.0 : 26629.4	-2.65 : 26627.2	-2.65 : 26630.5	-2.44 : 26633.8	-0.884 : 26626.1	-0.803 : 26628.3	-0.699 : 26631.6	-0.243 : 26634.9	0.0523 : 26635.10	230801	0	0	NaN	NaN	1	0	0.468167	0	0	-10.4277	1	0
ENSMUSG00000005625	PSMD4		PSMD4	A	proteasome (prosome, macropain) 26S subunit, non-ATPase, 4	proteasome complex|nucleus|nucleoplasm|cytoplasm|cytosol|proteasome regulatory particle, base subcomplex|proteasome accessory complex|	G1/S transition of mitotic cell cycle|protein polyubiquitination|mitotic cell cycle|antigen processing and presentation of peptide antigen via MHC class I|antigen processing and presentation of exogenous peptide antigen via MHC class I, TAP-dependent|regulation of cellular amino acid metabolic process|apoptotic process|DNA damage response, signal transduction by p53 class mediator resulting in ce…	protein binding|identical protein binding|poly(A) RNA binding|	10	-2.8	70.4	0.00063	1.12e-07	1.83e-07	-3.06	79.8	1e-05	-4.3	-1.83	-3.31 : 87995.1	-2.27 : 88004.10	-2.17 : 87999.5	-1.71 : 87997.3	-1.62 : 87998.4	-1.61 : 88003.9	-1.36 : 87996.2	-1.33 : 88000.6	-1.15 : 88002.8	-0.458 : 88001.7	19185	0	-1	NaN	NaN	NaN	NaN	0.272517	0	0	-4.31469	0	0
ENSMUSG00000002059	RAB34		RAB34	C	RAB34, member RAS oncogene family	Golgi apparatus|Golgi stack|phagocytic vesicle membrane|vesicle|Golgi cisterna|phagocytic vesicle|perinuclear region of cytoplasm|extracellular vesicular exosome|	small GTPase mediated signal transduction|antigen processing and presentation|lysosome localization|Golgi to plasma membrane protein transport|protein localization to plasma membrane|phagosome maturation|phagosome-lysosome fusion|	protein binding|GTP binding|	10	-0.6	8.34	0.384	4.49e-08	4.37e-09	-4.69	237	1e-05	-6.61	-4.12	-4.76 : 4033.10	-4.7 : 4026.3	-4.22 : 4028.5	-3.67 : 4024.1	-3.42 : 4029.6	-3.2 : 4032.9	-3.15 : 4031.8	-2.89 : 4030.7	-2.75 : 4025.2	-2.42 : 4027.4	19376	0	0	NaN	NaN	1	0	NaN	NaN	NaN	-8.82663	1	0
ENSMUSG00000022621	RABL2		RABL2A	C	RAB, member RAS oncogene family-like 2	intraciliary transport particle B|sperm midpiece|	small GTPase mediated signal transduction|single fertilization|sperm motility|cilium assembly|	nucleotide binding|protein binding|GTP binding|	10	-0.5	12.9	0.254	5.09e-08	8.41e-09	-5.62	213	1e-05	-7.84	-4.84	-5.71 : 117754.6	-5.32 : 117753.5	-4.75 : 117756.8	-4.51 : 117751.3	-4.46 : 117752.4	-4.05 : 117757.9	-3.23 : 117750.2	-2.36 : 117755.7	-1.63 : 117758.10	-1.02 : 117749.1	68708	0	0	NaN	NaN	1	0	NaN	NaN	NaN	-14.3073	1	0
ENSMUSG00000073733	RSG1		RSG1	A	REM2 and RAB-like small GTPase 1	cytoplasm|ciliary basal body|	exocytosis|small GTPase mediated signal transduction|protein transport|regulation of exocytosis|regulation of vesicle fusion|cellular protein localization|cilium assembly|	GTP binding|	10	0	0	0.889	9.75e-05	0.00505	-3.21	58.9	1e-05	-5.19	-2.48	-3.4 : 126057.6	-3.02 : 126056.5	-1.81 : 126053.2	-1.73 : 126058.7	-1.41 : 126054.3	-0.628 : 126061.10	-0.351 : 126055.4	-0.131 : 126060.9	-0.102 : 126052.1	-0.0152 : 126059.8	76166	0	0	NaN	1	1	0	0.66973	0	1	NaN	NaN	0
ENSMUSG00000038384	SETD1B		SETD1B	D	SET domain containing 1B	nucleus|chromosome|nuclear speck|histone methyltransferase complex|Set1C/COMPASS complex|	transcription, DNA-templated|regulation of transcription, DNA-templated|histone H3-K4 methylation|	nucleotide binding|RNA binding|protein binding|histone methyltransferase activity (H3-K4 specific)|	10	0	0	0.955	1.39e-07	2.79e-07	-3.34	74.6	1e-05	-4.85	-2.15	-3.6 : 205977.5	-3.02 : 205978.6	-2.36 : 205973.1	-2.12 : 205975.3	-1.68 : 205974.2	-1.59 : 205980.8	-1.48 : 205982.10	-1.25 : 205979.7	-1.01 : 205981.9	-0.552 : 205976.4	208043	0	0	NaN	NaN	1	0	NaN	NaN	NaN	-2.26581	0	1
ENSMUSG00000030714	SGF29		SGF29	A	coiled-coil domain containing 101	Ada2/Gcn5/Ada3 transcription activator complex|SAGA-type complex|	chromatin organization|transcription, DNA-templated|regulation of transcription, DNA-templated|histone H3 acetylation|establishment of protein localization to chromatin|	protein binding|methylated histone binding|	10	2.1	66.2	0.00075	5.51e-07	3.49e-06	-1.52	53.9	1e-05	-2.37	-1.19	-1.76 : 164788.6	-1.68 : 164786.4	-1.55 : 164789.7	-1.54 : 164791.9	-1.41 : 164790.8	-1.39 : 164784.2	-1.35 : 164783.1	-1.18 : 164792.10	-0.498 : 164785.3	-0.192 : 164787.5	75565	0	0	NaN	NaN	1	0	NaN	NaN	NaN	NaN	NaN	0
ENSMUSG00000001761	SMO		SMO	A	smoothened, frizzled class receptor	cytoplasm|Golgi apparatus|plasma membrane|plasma membrane|caveola|cilium|integral component of membrane|neuronal cell body|intracellular membrane-bounded organelle|ciliary membrane|extracellular vesicular exosome|primary cilium|	negative regulation of transcription from RNA polymerase II promoter|vasculogenesis|osteoblast differentiation|in utero embryonic development|cell fate specification|neural crest cell migration|heart looping|positive regulation of neuroblast proliferation|positive regulation of mesenchymal cell proliferation|heart morphogenesis|determination of left/right asymmetry in lateral mesoderm|type B panc…	G-protein coupled receptor activity|patched binding|protein binding|drug binding|Wnt-protein binding|PDZ domain binding|Wnt-activated receptor activity|	10	0	0	0.889	6.91e-08	1.68e-08	-6.3	134	1e-05	-9.17	-4.8	-6.46 : 32764.1	-4.83 : 32766.3	-4.51 : 32770.7	-3.4 : 32772.9	-2.54 : 32773.10	-1.96 : 32768.5	-1.59 : 32771.8	-1.36 : 32769.6	-1.12 : 32767.4	-0.784 : 32765.2	319757	0	0	NaN	1	1	0	0.528868	0	0	-2.72559	0	1
ENSMUSG00000039615	STUB1		STUB1	C	STIP1 homology and U-box containing protein 1, E3 ubiquitin protein ligase	ubiquitin ligase complex|nucleus|cytoplasm|cytosol|plasma membrane|ubiquitin conjugating enzyme complex|nuclear inclusion body|intermediate filament cytoskeleton|extracellular vesicular exosome|	protein polyubiquitination|protein polyubiquitination|DNA repair|ubiquitin-dependent protein catabolic process|misfolded or incompletely synthesized protein catabolic process|transforming growth factor beta receptor signaling pathway|negative regulation of transforming growth factor beta receptor signaling pathway|ubiquitin-dependent SMAD protein catabolic process|positive regulation of protein u…	ubiquitin-protein transferase activity|ubiquitin-protein transferase activity|ubiquitin-protein transferase activity|protein binding|ligase activity|enzyme binding|kinase binding|Hsp70 protein binding|protein binding, bridging|TPR domain binding|ubiquitin protein ligase binding|ubiquitin-ubiquitin ligase activity|protein homodimerization activity|SMAD binding|misfolded protein binding|Hsp90 prote…	10	-0.6	2.33	0.747	2.4e-05	4.88e-06	-3.05	65.6	1e-05	-4.28	-1.7	-3.21 : 224109.1	-2.09 : 224116.8	-2.02 : 224114.6	-1.91 : 224117.9	-1.76 : 224113.5	-1.59 : 224112.4	-0.926 : 224118.10	-0.879 : 224115.7	-0.45 : 224110.2	0.994 : 224111.3	56424	0	0	NaN	NaN	1	0	0.227331	0	0	-0.790288	0	0
ENSMUSG00000029386	TCTN2		TCTN2	A	tectonic family member 2	cytoplasm|cytoskeleton|integral component of membrane|TCTN-B9D complex|	smoothened signaling pathway|cilium assembly|cilium morphogenesis|	None	10	-2.7	19.4	0.163	2.6e-07	1.65e-06	-3.13	79.7	1e-05	-4.48	-2.24	-3.37 : 160199.3	-2.6 : 160205.9	-2.59 : 160206.10	-2.46 : 160201.5	-2.43 : 160202.6	-2.24 : 160204.8	-2.23 : 160200.4	-1.0 : 160197.1	-0.599 : 160203.7	-0.288 : 160198.2	67978	0	0	NaN	1	1	0	0.765403	1	0	-0.558799	0	0
ENSMUSG00000020895	TMEM107		TMEM107	B	transmembrane protein 107	cellular_component|integral component of membrane|	biological_process|neural tube patterning|cilium assembly|embryonic digit morphogenesis|	molecular_function|	10	-0.8	14.3	0.219	2.16e-07	2.06e-07	-4.65	190	1e-05	-6.68	-4.12	-4.75 : 32824.1	-4.66 : 32826.3	-4.36 : 32825.2	-3.5 : 32833.10	-3.38 : 32827.4	-3.29 : 32831.8	-2.65 : 32828.5	-2.44 : 32829.6	-2.14 : 32830.7	-0.201 : 32832.9	66910	0	0	NaN	NaN	1	0	0.797897	1	0	-4.6445	0	0
ENSMUSG00000024667	TMEM216		TMEM216	A	transmembrane protein 216	cytoplasm|cytoskeleton|cilium|integral component of membrane|TCTN-B9D complex|	cilium assembly|cilium morphogenesis|	None	10	-1.1	19.8	0.161	4.59e-06	8.85e-06	-4.46	110	1e-05	-6.61	-3.6	-4.64 : 141383.5	-4.03 : 141387.9	-3.86 : 141382.4	-3.71 : 141381.3	-3.39 : 141388.10	-2.48 : 141379.1	-1.72 : 141380.2	-0.509 : 141386.8	-0.42 : 141385.7	0.0979 : 141384.6	68642	0	0	NaN	1	1	0	0.53598	0	0	0.920873	0	0
ENSMUSG00000031951	TMEM231		TMEM231	A	transmembrane protein 231	integral component of membrane|ciliary transition zone|TCTN-B9D complex|ciliary membrane|	smoothened signaling pathway|cilium assembly|	None	10	-1.2	8.76	0.242	6.9e-08	1.94e-08	-4.48	102	1e-05	-6.52	-3.87	-4.61 : 120147.4	-4.58 : 120146.3	-2.66 : 120149.6	-2.48 : 120153.10	-2.37 : 120150.7	-1.98 : 120148.5	-1.89 : 120152.9	-1.88 : 120151.8	-1.22 : 120145.2	-0.746 : 120144.1	234740	0	0	NaN	1	1	0	0.827409	1	0	1.0741	0	0
ENSMUSG00000034292	TRAF3IP1		TRAF3IP1	C	TNF receptor-associated factor 3 interacting protein 1	cytoplasm|cytoskeleton|cilium|	None	protein binding|microtubule binding|	10	-0.9	14.5	0.225	2.99e-07	3.03e-07	-5.4	178	1e-05	-7.77	-4.76	-5.48 : 90604.2	-5.28 : 90605.3	-3.98 : 90603.1	-3.72 : 90610.8	-3.57 : 90609.7	-3.39 : 90608.6	-2.07 : 90611.9	-1.27 : 90612.10	-1.19 : 90607.5	-0.163 : 90606.4	74019	0	0	NaN	1	1	0	0.645644	0	1	-7.88457	1	0
ENSMUSG00000002496	TSC2		TSC2	B	tuberous sclerosis 2	nucleus|cytoplasm|cytoplasm|Golgi apparatus|cytosol|cytosol|caveola|membrane|dendrite|growth cone|TSC1-TSC2 complex|neuronal cell body|perinuclear region of cytoplasm|	response to hypoxia|neural tube closure|negative regulation of protein kinase activity|protein import into nucleus|endocytosis|acute-phase response|cell cycle arrest|epidermal growth factor receptor signaling pathway|heart development|protein localization|negative regulation of cell proliferation|insulin receptor signaling pathway|fibroblast growth factor receptor signaling pathway|phosphatidylin…	GTPase activator activity|protein binding|phosphatase binding|protein homodimerization activity|protein heterodimerization activity|14-3-3 protein binding|	10	2.3	142	1e-05	6.37e-06	6.62e-07	-2.43	62.9	1e-05	-3.57	-1.85	-2.66 : 85558.9	-2.29 : 85552.3	-2.04 : 85557.8	-2.0 : 85551.2	-1.99 : 85554.5	-1.93 : 85553.4	-1.54 : 85559.10	-1.37 : 85555.6	-0.719 : 85550.1	0.261 : 85556.7	22084	0	0	NaN	NaN	1	0	0.346473	0	0	-5.07231	0	0
ENSMUSG00000034848	TTC21B		TTC21B	A	tetratricopeptide repeat domain 21B	cytoplasm|cytoskeleton|cilium|intraciliary transport particle A|	regulation of transcription from RNA polymerase II promoter|smoothened signaling pathway|intraciliary transport|cilium morphogenesis|protein localization to cilium|	None	10	0	0	0.889	3.29e-07	2.84e-06	-3.68	71.9	1e-05	-5.32	-2.66	-3.89 : 175592.10	-3.21 : 175586.4	-2.74 : 175587.5	-2.71 : 175583.1	-1.82 : 175585.3	-1.64 : 175588.6	-1.48 : 175584.2	-0.744 : 175589.7	-0.467 : 175590.8	-0.309 : 175591.9	73668	0	0	NaN	1	1	0	NaN	NaN	NaN	-8.81117	1	0
ENSMUSG00000056832	TTC26		TTC26	A	tetratricopeptide repeat domain 26	ciliary basal body|primary cilium|	cilium assembly|	None	10	-0.2	0.113	0.845	1.94e-07	3.01e-07	-3.86	105	1e-05	-5.65	-3.38	-4.04 : 61295.5	-3.92 : 61299.9	-3.76 : 61293.3	-3.5 : 61296.6	-3.1 : 61292.2	-1.71 : 61298.8	-1.48 : 61291.1	-1.24 : 61294.4	-1.18 : 61297.7	-0.28 : 61300.10	264134	0	0	NaN	1	1	0	0.941077	1	0	0.246265	0	0
ENSMUSG00000028437	UBAP1		UBAP1	B	ubiquitin associated protein 1	ESCRT I complex|cytoplasm|cytosol|	protein transport|ubiquitin-dependent protein catabolic process via the multivesicular body sorting pathway|	ubiquitin binding|	10	1.3	3.79	0.527	1.76e-07	1.79e-07	-3.11	62.6	1e-05	-4.27	-1.58	-3.29 : 42646.3	-2.03 : 42649.6	-1.97 : 42645.2	-1.5 : 42652.9	-1.48 : 42644.1	-1.09 : 42651.8	-1.08 : 42648.5	-0.914 : 42647.4	-0.608 : 42653.10	-0.447 : 42650.7	67123	0	0	NaN	NaN	1	0	0.291793	0	0	-4.43702	0	0
ENSMUSG00000027411	VPS16		VPS16	B	vacuolar protein sorting 16 homolog (S. cerevisiae)	lysosomal membrane|early endosome|late endosome|actin filament|axon|HOPS complex|late endosome membrane|neuronal cell body|recycling endosome|	intracellular protein transport|	actin filament binding|	10	0.4	3.98	0.514	1.19e-07	3.96e-08	-1.93	54.3	1e-05	-2.93	-1.52	-2.21 : 51955.9	-1.93 : 51952.6	-1.86 : 51948.2	-1.84 : 51950.4	-1.4 : 51956.10	-1.01 : 51951.5	-1.01 : 51953.7	-0.972 : 51954.8	-0.913 : 51949.3	-0.59 : 51947.1	80743	0	0	NaN	NaN	1	0	0.251457	0	0	-0.718257	0	0
ENSMUSG00000027291	VPS39		VPS39	B	vacuolar protein sorting 39 homolog (S. cerevisiae)	lysosomal membrane|HOPS complex|late endosome membrane|	intracellular protein transport|vesicle-mediated transport|regulation of catalytic activity|	small GTPase regulator activity|	10	0.4	6.26	0.39	1.02e-05	4.63e-05	-2.82	50	1e-05	-4.22	-1.89	-3.0 : 144577.1	-2.44 : 144584.8	-2.06 : 144578.2	-1.94 : 144583.7	-1.81 : 144579.3	-1.81 : 144582.6	-1.39 : 144580.4	-0.407 : 144585.9	-0.303 : 144586.10	0.123 : 144581.5	269338	0	0	NaN	NaN	1	0	0.333987	0	0	-2.17648	0	0
ENSMUSG00000041236	VPS41		VPS41	C	vacuolar protein sorting 41 homolog (S. cerevisiae)	lysosomal membrane|early endosome|late endosome|Golgi-associated vesicle|cytosol|microtubule|membrane|HOPS complex|	intracellular protein transport|biological_process|vesicle-mediated transport|Golgi vesicle transport|	molecular_function|protein binding|microtubule binding|zinc ion binding|	10	0.7	13.1	0.25	1.59e-05	9.84e-07	-3.27	94.4	1e-05	-4.78	-2.54	-3.42 : 99929.1	-3.12 : 99932.4	-2.5 : 99937.9	-2.02 : 99936.8	-1.87 : 99938.10	-1.7 : 99930.2	-1.47 : 99934.6	-0.938 : 99935.7	-0.67 : 99933.5	0.801 : 99931.3	218035	0	0	NaN	NaN	1	0	0.376987	0	0	-5.87433	0	0
ENSMUSG00000037890	WDR19		WDR19	C	WD repeat domain 19	cytoplasm|cytoskeleton|intraciliary transport particle A|nonmotile primary cilium|motile cilium|photoreceptor connecting cilium|	in utero embryonic development|embryonic limb morphogenesis|embryonic camera-type eye development|intraciliary retrograde transport|cilium assembly|ear morphogenesis|embryonic cranial skeleton morphogenesis|neurological system process|digestive system development|ciliary receptor clustering involved in smoothened signaling pathway|smoothened signaling pathway involved in dorsal/ventral neural tub…	None	10	-0.2	1.3	0.836	4.66e-05	1.06e-05	-4.92	115	1e-05	-7.32	-4.14	-5.0 : 134702.8	-4.59 : 134703.9	-3.56 : 134699.5	-3.34 : 134704.10	-1.04 : 134695.1	-1.0 : 134696.2	-0.974 : 134698.4	-0.967 : 134697.3	-0.128 : 134701.7	0.365 : 134700.6	213081	0	0	NaN	1	1	0	0.676789	0	1	-0.597308	0	0
ENSMUSG00000039715	WDR34		WDR34	A	WD repeat domain 34	centriole|axoneme|ciliary basal body|	None	None	10	0	0	0.889	1.69e-06	6.96e-06	-4.58	112	1e-05	-6.72	-3.11	-4.76 : 7715.10	-3.35 : 7707.2	-3.2 : 7714.9	-2.44 : 7713.8	-2.03 : 7706.1	-1.88 : 7711.6	-1.68 : 7712.7	-1.56 : 7710.5	-0.403 : 7709.4	-0.0192 : 7708.3	71820	0	0	NaN	1	1	0	0.3356	0	0	-4.51619	1	0
ENSMUSG00000066643	WDR35		WDR35	A	WD repeat domain 35	centrosome|axoneme|intraciliary transport particle A|ciliary basal body|	intraciliary retrograde transport|cilium assembly|	None	10	0	0	0.889	1.22e-07	3.22e-07	-3.92	60.2	1e-05	-5.52	-2.3	-4.13 : 49536.4	-2.66 : 49533.1	-2.57 : 49539.7	-2.49 : 49535.3	-2.47 : 49542.10	-2.33 : 49537.5	-2.12 : 49538.6	-1.03 : 49534.2	-0.978 : 49541.9	-0.417 : 49540.8	74682	0	0	NaN	1	1	0	0.849186	1	0	-0.971958	0	0
ENSMUSG00000041130	ZFP598		ZNF598	C	zinc finger protein 598	None	biological_process|	zinc ion binding|poly(A) RNA binding|metal ion binding|	10	-0.7	17.6	0.181	6.02e-08	9.51e-09	-3.59	141	1e-05	-5.07	-2.91	-3.75 : 1323.2	-3.41 : 1329.8	-3.07 : 1328.7	-2.94 : 1322.1	-2.23 : 1325.4	-2.02 : 1326.5	-1.87 : 1331.10	-1.28 : 1324.3	-1.14 : 1330.9	-0.963 : 1327.6	213753	0	0	NaN	NaN	1	0	0.194703	0	0	0.394431	0	0
ENSMUSG00000031885	CBFB		CBFB	B	core-binding factor, beta subunit	cellular_component|nucleus|membrane|	osteoblast differentiation|transcription from RNA polymerase II promoter|lymphocyte differentiation|myeloid cell differentiation|positive regulation of transcription from RNA polymerase II promoter|cell maturation|definitive hemopoiesis|	DNA binding|sequence-specific DNA binding transcription factor activity|transcription coactivator activity|protein binding|	10	0	0	0.942	1.31e-07	3.78e-08	-1.67	49.3	2e-05	-2.65	-1.31	-2.02 : 67124.8	-1.66 : 67119.3	-1.62 : 67117.1	-1.6 : 67123.7	-1.55 : 67118.2	-1.3 : 67120.4	-0.96 : 67121.5	-0.938 : 67122.6	-0.673 : 67125.9	-0.598 : 67126.10	12400	0	0	NaN	NaN	1	0	0.39238	0	0	-0.473514	0	0
ENSMUSG00000048402	GLI2		GLI2	C	GLI family zinc finger 2	nucleus|cytoplasm|membrane|nuclear speck|motile primary cilium|	negative regulation of transcription from RNA polymerase II promoter|skeletal system development|osteoblast differentiation|in utero embryonic development|kidney development|chondrocyte differentiation|osteoblast development|transcription, DNA-templated|regulation of transcription, DNA-templated|smoothened signaling pathway|pattern specification process|axon guidance|ventral midline development|h…	chromatin binding|sequence-specific DNA binding transcription factor activity|protein binding|zinc ion binding|sequence-specific DNA binding|transcription regulatory region DNA binding|	9	0	0	0.973	1.58e-06	1.19e-06	-2.85	59.4	2e-05	-4.41	-2.27	-2.98 : 101924.5	-2.85 : 101927.8	-1.98 : 101929.10	-1.55 : 101926.7	-1.47 : 101923.4	-0.649 : 101921.2	-0.548 : 101925.6	-0.425 : 101928.9	-0.414 : 101922.3		14633	0	0	NaN	1	1	0	0.532528	0	0	-8.89711	1	1
ENSMUSG00000061104	GM10094	SAP18B		C	predicted gene 10094	cellular_component|	biological_process|	molecular_function|	10	-1.9	31.9	0.0419	0.16	0.0604	-3.73	55.5	2e-05	-6.49	-3.18	-3.78 : 60921.7	-3.52 : 60922.8	-1.73 : 60919.5	-0.815 : 60924.10	-0.485 : 60923.9	0.09 : 60917.3	0.13 : 60915.1	0.178 : 60916.2	0.199 : 60920.6	0.272 : 60918.4	100041953	6	0	NaN	NaN	1	0	NaN	NaN	NaN	NaN	NaN	NaN
ENSMUSG00000001098	KCTD10		KCTD10	C	potassium channel tetramerization domain containing 10	nucleus|cytoplasm|Cul3-RING ubiquitin ligase complex|TCTN-B9D complex|	protein ubiquitination|protein ubiquitination|proteasome-mediated ubiquitin-dependent protein catabolic process|protein homooligomerization|	ubiquitin-protein transferase activity|	10	1.1	19.5	0.158	8.67e-08	2.35e-08	-2.23	58.7	2e-05	-3.23	-1.57	-2.4 : 113897.5	-2.27 : 113896.4	-1.68 : 113902.10	-1.64 : 113898.6	-1.49 : 113900.8	-1.43 : 113893.1	-1.32 : 113895.3	-1.2 : 113899.7	-0.903 : 113901.9	-0.695 : 113894.2	330171	0	0	NaN	NaN	1	0	0.387823	0	0	-1.23933	0	0
ENSMUSG00000002968	MED25		MED25	C	mediator complex subunit 25	nucleoplasm|	negative regulation of transcription from RNA polymerase II promoter|transcription initiation from RNA polymerase II promoter|cell death|gene expression|positive regulation of chromatin binding|positive regulation of transcription from RNA polymerase II promoter|negative regulation of fibroblast proliferation|positive regulation of cell cycle arrest|positive regulation of mediator complex assembl…	protein binding|transcription factor binding|retinoic acid receptor binding|retinoid X receptor binding|	10	0	0	0.973	8.59e-08	3.59e-08	-2.05	59	2e-05	-3.01	-1.6	-2.2 : 136750.9	-2.11 : 136748.7	-2.0 : 136749.8	-1.65 : 136744.3	-1.63 : 136751.10	-1.51 : 136747.6	-1.43 : 136742.1	-1.2 : 136746.5	-1.0 : 136743.2	-0.615 : 136745.4	75613	0	0	NaN	NaN	1	0	NaN	NaN	NaN	-2.43856	0	0
ENSMUSG00000028496	MLLT3		MLLT3	B	myeloid/lymphoid or mixed-lineage leukemia (trithorax homolog, Drosophila); translocated to, 3	nucleus|extracellular vesicular exosome|	transcription, DNA-templated|regulation of transcription, DNA-templated|segment specification|anterior/posterior pattern specification|negative regulation of canonical Wnt signaling pathway|negative regulation of canonical Wnt signaling pathway|positive regulation of Wnt signaling pathway, planar cell polarity pathway|	protein binding|	10	-1.1	5.07	0.448	0.000119	4.63e-05	-2.37	46.3	2e-05	-3.65	-1.77	-2.58 : 110056.4	-2.28 : 110055.3	-2.03 : 110061.9	-1.76 : 110057.5	-1.61 : 110053.1	-1.37 : 110058.6	-1.27 : 110060.8	-0.543 : 110062.10	0.084 : 110059.7	0.212 : 110054.2	70122	0	0	NaN	NaN	1	0	0.53513	0	0	-4.56022	0	0
ENSMUSG00000021022	PPP2R3C		PPP2R3C	B	protein phosphatase 2, regulatory subunit B'', gamma	nucleus|cytoplasm|centrosome|	B cell homeostasis|regulation of antimicrobial humoral response|activation of protein kinase activity|T cell homeostasis|positive regulation of B cell differentiation|spleen development|regulation of mitochondrial depolarization|	calcium ion binding|	10	0	0	0.942	4.4e-07	2.12e-06	-1.72	47.7	2e-05	-2.56	-1.36	-1.86 : 101180.9	-1.81 : 101179.8	-1.74 : 101178.7	-1.67 : 101181.10	-1.27 : 101175.4	-1.23 : 101172.1	-1.19 : 101176.5	-0.88 : 101177.6	-0.541 : 101173.2	-0.222 : 101174.3	59032	0	0	NaN	NaN	1	0	0.402403	0	0	2.1334	0	0
ENSMUSG00000042369	RBM45		RBM45	C	RNA binding motif protein 45	nucleus|cytoplasm|	nervous system development|cell differentiation|	nucleotide binding|RNA binding|poly(A) RNA binding|	10	0	0	0.973	4.46e-06	1.68e-06	-6.61	57.6	2e-05	-9.83	-4.53	-6.67 : 219499.4	-2.2 : 219498.3	-2.11 : 219505.10	-1.98 : 219500.5	-1.83 : 219504.9	-1.56 : 219497.2	-1.04 : 219503.8	-1.02 : 219496.1	-0.572 : 219501.6	0.15 : 219502.7	241490	0	0	NaN	NaN	1	0	0.560263	0	0	-2.95368	0	0
ENSMUSG00000028898	TRNAU1AP		TRNAU1AP	C	tRNA selenocysteine 1 associated protein 1	nucleus|cytoplasm|	selenocysteine incorporation|	nucleotide binding|poly(A) RNA binding|	10	-0.6	11.6	0.283	0.000159	0.00171	-3.43	60.1	2e-05	-5.96	-2.73	-3.52 : 146547.1	-3.21 : 146549.3	-1.76 : 146552.6	-0.885 : 146553.7	-0.822 : 146548.2	-0.501 : 146550.4	-0.326 : 146555.9	-0.255 : 146551.5	-0.123 : 146554.8	0.161 : 146556.10	71787	0	0	NaN	NaN	1	0	0.58994	0	0	-2.39162	0	1
ENSMUSG00000024118	1600002H07RIK		C16ORF59	A	RIKEN cDNA 1600002H07 gene	cellular_component|	biological_process|	molecular_function|	10	-1.3	24.5	0.0676	0.00355	0.008	-3.57	50.8	3e-05	-6.11	-2.71	-3.73 : 50810.2	-3.12 : 50809.1	-2.24 : 50813.5	-1.77 : 50811.3	-0.546 : 50818.10	-0.537 : 50814.6	-0.286 : 50816.8	-0.103 : 50812.4	0.119 : 50817.9	0.712 : 50815.7	72016	0	0	NaN	NaN	1	0	0.466433	0	0	-9.94542	1	0
ENSMUSG00000047388	ATMIN		ATMIN	C	ATM interactor	nucleus|	transcription, DNA-templated|cellular response to DNA damage stimulus|positive regulation of transcription, DNA-templated|	protein binding|transcription regulatory region DNA binding|dynein binding|metal ion binding|	10	-0.5	7.59	0.413	3.82e-07	8.97e-07	-2.27	54.8	3e-05	-3.32	-1.78	-2.43 : 192039.5	-2.29 : 192041.7	-2.1 : 192042.8	-1.78 : 192036.2	-1.6 : 192044.10	-1.4 : 192037.3	-1.23 : 192043.9	-0.849 : 192038.4	-0.688 : 192035.1	-0.192 : 192040.6	234776	0	0	NaN	NaN	1	0	0.44985	0	0	0.191686	0	0
ENSMUSG00000024392	BAG6		BAG6	B	BCL2-associated athanogene 6	nucleus|cytosol|BAT3 complex|	kidney development|immune system process|ubiquitin-dependent protein catabolic process|transport|synaptonemal complex assembly|spermatogenesis|brain development|embryo development|chromatin modification|internal peptidyl-lysine acetylation|cell differentiation|lung development|negative regulation of proteasomal ubiquitin-dependent protein catabolic process|regulation of cell proliferation|intrins…	protein binding|Hsp70 protein binding|polyubiquitin binding|ribosome binding|proteasome binding|	10	0.5	7.36	0.35	3.67e-06	1.28e-05	0.94	38.4	3e-05	0.66	1.56	0.0898 : 146982.10	0.173 : 146981.9	0.686 : 146978.6	0.814 : 146976.4	0.828 : 146979.7	0.849 : 146974.2	0.976 : 146973.1	1.05 : 146975.3	1.08 : 146977.5	1.12 : 146980.8	224727	0	0	NaN	NaN	1	0	0.268187	0	0	-4.79102	1	0
ENSMUSG00000023175	BSG		BSG	B	basigin (Ok blood group)	Golgi membrane|acrosomal membrane|mitochondrion|plasma membrane|integral component of plasma membrane|membrane|sarcolemma|melanosome|membrane raft|extracellular vesicular exosome|	pyruvate metabolic process|cell surface receptor signaling pathway|embryo implantation|blood coagulation|extracellular matrix disassembly|extracellular matrix organization|odontogenesis of dentin-containing tooth|response to peptide hormone|cellular metabolic process|small molecule metabolic process|response to mercury ion|decidualization|leukocyte migration|response to cAMP|protein targeting to …	protein binding|mannose binding|	10	-0.5	6.56	0.378	9.97e-06	1.44e-05	-1.95	41.8	3e-05	-2.97	-1.35	-2.1 : 138477.10	-2.03 : 138474.7	-1.61 : 138472.5	-1.37 : 138476.9	-1.17 : 138469.2	-1.05 : 138473.6	-0.975 : 138471.4	-0.791 : 138475.8	-0.196 : 138470.3	0.0742 : 138468.1	12215	0	0	NaN	NaN	1	0	0.21984	0	0	-7.7931	0	0
ENSMUSG00000056201	CFL1		CFL1	B	cofilin 1 (non-muscle)	extracellular space|nucleus|cytoplasm|membrane|nuclear matrix|cortical actin cytoskeleton|lamellipodium membrane|ruffle membrane|extracellular vesicular exosome|	neural crest cell migration|neural fold formation|platelet degranulation|protein phosphorylation|protein import into nucleus|cytoskeleton organization|Rho protein signal transduction|axon guidance|blood coagulation|response to virus|regulation of cell morphogenesis|establishment of cell polarity|actin cytoskeleton organization|actin filament depolymerization|platelet activation|positive regulatio…	actin binding|protein binding|	9	-2.7	49.3	0.00872	0.000485	0.00494	-3.59	43.2	3e-05	-5.94	-2.06	-3.69 : 193248.9	-2.42 : 193246.7	-1.66 : 193244.5	-1.34 : 193240.1	-1.28 : 193249.10	-0.474 : 193241.2	-0.193 : 193245.6	0.00936 : 193243.4	0.0609 : 193242.3		12631	0	0	NaN	NaN	1	0	0.27396	0	0	-2.84254	0	0
ENSMUSG00000028419	CHMP5		CHMP5	B	charged multivesicular body protein 5	nucleus|cytosol|endosome membrane|extracellular vesicular exosome|	regulation of receptor recycling|lysosome organization|endosome to lysosome transport|protein transport|viral process|endosomal transport|viral life cycle|membrane organization|	protein binding|	10	1.8	92.5	5e-05	8.19e-06	1.19e-05	-1.67	39.7	3e-05	-2.51	-1.11	-1.99 : 101837.8	-1.51 : 101835.6	-1.43 : 101831.2	-1.25 : 101836.7	-1.21 : 101833.4	-1.18 : 101832.3	-1.06 : 101830.1	-0.898 : 101834.5	-0.361 : 101839.10	0.141 : 101838.9	76959	0	0	NaN	NaN	1	0	0.334267	0	0	-0.459462	0	0
ENSMUSG00000004364	CUL3		CUL3	C	cullin 3	Golgi membrane|nucleus|polar microtubule|membrane|Cul3-RING ubiquitin ligase complex|extracellular vesicular exosome|	G1/S transition of mitotic cell cycle|mitotic anaphase|protein polyubiquitination|cytokinesis|trophectodermal cellular morphogenesis|protein monoubiquitination|ER to Golgi vesicle-mediated transport|cell cycle arrest|integrin-mediated signaling pathway|gastrulation|cyclin catabolic process|positive regulation of cell proliferation|Wnt signaling pathway|cell migration|protein ubiquitination|stem c…	ubiquitin-protein transferase activity|protein binding|cyclin binding|POZ domain binding|ubiquitin protein ligase binding|	10	0.5	11.1	0.295	1.39e-06	1.2e-06	-2.01	51.6	3e-05	-3.02	-1.58	-2.16 : 54504.5	-2.06 : 54505.6	-1.97 : 54503.4	-1.73 : 54500.1	-1.49 : 54507.8	-1.39 : 54502.3	-1.19 : 54508.9	-1.1 : 54501.2	-0.625 : 54509.10	-0.00578 : 54506.7	26554	0	0	NaN	NaN	1	0	0.49416	0	0	-4.12148	0	0
ENSMUSG00000020716	NF1		NF1	B	neurofibromin 1	nucleus|nucleolus|cytoplasm|cytoplasm|membrane|axon|dendrite|intrinsic component of the cytoplasmic side of the plasma membrane|	MAPK cascade|osteoblast differentiation|metanephros development|response to hypoxia|liver development|negative regulation of endothelial cell proliferation|positive regulation of endothelial cell proliferation|regulation of cell-matrix adhesion|negative regulation of cell-matrix adhesion|negative regulation of protein kinase activity|cell communication|Ras protein signal transduction|negative reg…	Ras GTPase activator activity|protein binding|phosphatidylethanolamine binding|phosphatidylcholine binding|	10	1.3	59.5	0.00224	2.63e-07	6.02e-07	-1.27	42.6	3e-05	-2.08	-0.94	-1.62 : 118002.4	-1.3 : 118000.2	-1.28 : 118003.5	-1.14 : 118008.10	-1.13 : 118006.8	-1.12 : 117999.1	-1.12 : 118005.7	-1.05 : 118004.6	-0.751 : 118007.9	-0.327 : 118001.3	18015	0	0	NaN	NaN	1	0	NaN	NaN	NaN	-3.03991	0	0
ENSMUSG00000029202	PDS5A		PDS5A	B	PDS5, regulator of cohesion maintenance, homolog A (S. cerevisiae)	chromosome, centromeric region|chromatin|nucleus|nucleoplasm|chromosome|cytosol|plasma membrane|	mitotic cell cycle|mitotic nuclear division|negative regulation of DNA replication|	protein binding|	10	-0.5	4.8	0.463	0.000174	0.000181	-2.1	40.2	3e-05	-3.24	-1.58	-2.33 : 222376.6	-1.96 : 222371.1	-1.88 : 222375.5	-1.82 : 222377.7	-1.5 : 222378.8	-1.07 : 222379.9	-1.07 : 222372.2	-0.135 : 222373.3	0.0634 : 222380.10	0.0792 : 222374.4	71521	0	0	NaN	NaN	1	0	0.32126	0	0	-2.1363	0	0
ENSMUSG00000028961	PGD		PGD	B	phosphogluconate dehydrogenase	nucleus|cytosol|extracellular vesicular exosome|	carbohydrate metabolic process|pentose-phosphate shunt|pentose-phosphate shunt|pentose-phosphate shunt, oxidative branch|pentose biosynthetic process|D-gluconate metabolic process|small molecule metabolic process|oxidation-reduction process|	phosphogluconate dehydrogenase (decarboxylating) activity|phosphogluconate dehydrogenase (decarboxylating) activity|NADP binding|	10	-2.7	64.2	0.00128	0.000192	0.00112	-3.52	43.6	3e-05	-5.73	-1.96	-3.63 : 225875.1	-2.4 : 225880.6	-1.83 : 225883.9	-1.52 : 225881.7	-1.13 : 225882.8	-0.448 : 225876.2	-0.414 : 225878.4	-0.221 : 225884.10	-0.168 : 225879.5	0.288 : 225877.3	110208	0	-1	NaN	NaN	NaN	NaN	0.216813	0	0	-3.2317	0	0
ENSMUSG00000050229	PIGM		PIGM	B	phosphatidylinositol glycan anchor biosynthesis, class M	endoplasmic reticulum membrane|integral component of membrane|	C-terminal protein lipidation|preassembly of GPI anchor in ER membrane|post-translational protein modification|cellular protein metabolic process|mannosylation|	mannosyltransferase activity|	10	-1.4	20.9	0.159	0.000955	0.00518	-3.17	43.8	3e-05	-5.44	-2.65	-3.23 : 195970.7	-3.2 : 195968.5	-1.66 : 195967.4	-1.37 : 195973.10	-0.466 : 195971.8	-0.36 : 195972.9	-0.33 : 195965.2	-0.0948 : 195964.1	0.0516 : 195966.3	0.106 : 195969.6	67556	0	0	NaN	NaN	1	0	0.514687	0	0	-0.482976	0	0
ENSMUSG00000020349	PPP2CA		PPP2CA	B	protein phosphatase 2, catalytic subunit, alpha isozyme	protein phosphatase type 2A complex|protein phosphatase type 2A complex|chromosome, centromeric region|spindle pole|nucleus|mitochondrion|cytosol|plasma membrane|microtubule cytoskeleton|membrane|extracellular vesicular exosome|	nuclear-transcribed mRNA catabolic process, nonsense-mediated decay|inactivation of MAPK activity|mitotic cell cycle|regulation of DNA replication|regulation of transcription, DNA-templated|protein dephosphorylation|ceramide metabolic process|apoptotic process|mitotic nuclear envelope reassembly|meiotic nuclear division|mesoderm development|RNA splicing|fibroblast growth factor receptor signaling…	protein serine/threonine phosphatase activity|protein binding|protein C-terminus binding|metal ion binding|protein dimerization activity|	8	-3.7	149	1e-05	6.34e-06	1.88e-05	-3.62	43.5	3e-05	-5.63	-1.2	-3.73 : 2080.7	-1.63 : 2074.1	-1.52 : 2079.6	-1.24 : 2078.5	-0.959 : 2077.4	-0.753 : 2083.10	-0.491 : 2076.3	-0.338 : 2081.8			19052	0	-1	NaN	NaN	NaN	NaN	0.344037	0	0	-6.55224	0	0
ENSMUSG00000060636	RPL35A		RPL35A	C	ribosomal protein L35a	cytosol|membrane|cytosolic large ribosomal subunit|extracellular vesicular exosome|	nuclear-transcribed mRNA catabolic process, nonsense-mediated decay|rRNA processing|translation|translation|translational initiation|translational elongation|translational termination|SRP-dependent cotranslational protein targeting to membrane|gene expression|viral process|RNA metabolic process|mRNA metabolic process|viral life cycle|viral transcription|ribosomal large subunit biogenesis|cellular…	tRNA binding|structural constituent of ribosome|poly(A) RNA binding|	8	-6.7	159	1e-05	0.00149	0.00353	-3.23	53.2	3e-05	-5.67	-2.81	-3.27 : 31361.10	-3.23 : 31358.7	-0.68 : 31359.8	-0.578 : 31354.3	-0.435 : 31353.2	-0.386 : 31355.4	-0.135 : 31352.1	0.199 : 31360.9			57808	0	-1	1	NaN	NaN	NaN	0.259747	0	0	-10.523	1	0
ENSMUSG00000075273	TTC30B		TTC30B	C	tetratricopeptide repeat domain 30B	cilium|	cell projection organization|	protein binding|	10	0.3	1.55	0.814	0.575	0.0896	-3.81	51.3	3e-05	-6.65	-3.27	-3.85 : 206222.10	-3.5 : 206218.6	-1.29 : 206215.3	-0.511 : 206217.5	-0.417 : 206221.9	0.0648 : 206214.2	0.32 : 206216.4	0.434 : 206219.7	0.816 : 206220.8	0.846 : 206213.1	72421	0	0	NaN	1	1	0	0.723663	1	0	-0.741831	0	0
ENSMUSG00000038429	USP5		USP5	B	ubiquitin specific peptidase 5 (isopeptidase T)	lysosome|	ubiquitin-dependent protein catabolic process|positive regulation of proteasomal ubiquitin-dependent protein catabolic process|protein K48-linked deubiquitination|	cysteine-type endopeptidase activity|ubiquitin thiolesterase activity|protein binding|omega peptidase activity|zinc ion binding|	10	-2.7	48.4	0.0097	0.000684	0.000148	-2	43.4	3e-05	-3.11	-1.54	-2.15 : 176516.4	-2.06 : 176521.9	-1.93 : 176517.5	-1.64 : 176514.2	-1.58 : 176519.7	-1.14 : 176518.6	-1.02 : 176522.10	-0.412 : 176513.1	0.305 : 176520.8	0.369 : 176515.3	22225	0	0	NaN	NaN	1	0	0.271168	0	0	-6.14107	1	0
ENSMUSG00000096768	ERDR1			D	erythroid differentiation regulator 1	cellular_component|	negative regulation of cell proliferation|negative regulation of cell migration|somatic stem cell maintenance|	molecular_function|	10	-5.3	171	1e-05	0.000593	0.00498	-3.03	46.8	4e-05	-5.19	-2.21	-3.22 : 88691.1	-2.95 : 88698.8	-2.19 : 88695.5	-1.95 : 88696.6	-1.02 : 88700.10	-0.342 : 88692.2	-0.27 : 88699.9	-0.163 : 88693.3	-0.148 : 88694.4	0.187 : 88697.7	170942	8	-1	NaN	NaN	NaN	NaN	NaN	NaN	NaN	-9.13216	0	0
ENSMUSG00000022314	RAD21		RAD21	A	RAD21 homolog (S. pombe)	chromosome, centromeric region|nucleus|nucleoplasm|chromosome|cytosol|cohesin complex|membrane|nuclear meiotic cohesin complex|	mitotic cell cycle|double-strand break repair|DNA recombination|regulation of transcription from RNA polymerase II promoter|apoptotic process|chromosome segregation|mitotic nuclear division|reciprocal meiotic recombination|protein localization to chromatin|	protein binding|	10	-3.5	37.9	0.0159	7.45e-05	7.8e-05	-3.27	48.7	4e-05	-4.77	-1.18	-3.48 : 123357.4	-1.72 : 123361.8	-1.58 : 123358.5	-1.27 : 123356.3	-1.14 : 123363.10	-0.907 : 123354.1	-0.787 : 123359.6	-0.493 : 123355.2	-0.243 : 123360.7	0.7 : 123362.9	19357	0	0	NaN	NaN	1	0	0.396973	0	0	-6.68468	1	0
ENSMUSG00000025231	SUFU		SUFU	A	suppressor of fused homolog (Drosophila)	nucleus|cytoplasm|cytoplasm|primary cilium|	negative regulation of transcription from RNA polymerase II promoter|skeletal system development|neural tube closure|heart looping|regulation of transcription, DNA-templated|proteolysis|signal transduction|multicellular organismal development|smoothened signaling pathway involved in ventral spinal cord interneuron specification|smoothened signaling pathway involved in spinal cord motor neuron cel…	transcription corepressor activity|signal transducer activity|protein binding|beta-catenin binding|transcription factor binding|protein kinase binding|	10	0	0	0.889	4.91e-06	3.56e-07	1.38	48.6	4e-05	1	2.2	-0.203 : 196321.10	0.922 : 196315.4	1.03 : 196316.5	1.07 : 196314.3	1.2 : 196319.8	1.27 : 196320.9	1.29 : 196317.6	1.33 : 196313.2	1.59 : 196312.1	1.64 : 196318.7	24069	0	0	NaN	1	1	0	0.613973	0	0	-0.8077	0	0
ENSMUSG00000024335	BRD2		BRD2	B	bromodomain containing 2	nucleus|cytoplasm|	nucleosome assembly|transcription, DNA-templated|regulation of transcription from RNA polymerase II promoter|spermatogenesis|chromatin modification|	chromatin binding|protein binding|lysine-acetylated histone binding|	10	-2.3	68.8	0.001	1.23e-05	3.02e-05	-2.28	36.7	5e-05	-3.56	-1.54	-2.5 : 22998.7	-2.07 : 22995.4	-1.81 : 22992.1	-1.23 : 23000.9	-1.1 : 22997.6	-0.861 : 22993.2	-0.842 : 23001.10	-0.41 : 22999.8	-0.329 : 22994.3	0.114 : 22996.5	14312	0	0	NaN	NaN	1	0	0.308623	0	0	-1.24547	0	0
ENSMUSG00000047539	FBXO28		FBXO28	B	F-box protein 28	None	None	None	10	-0.6	3.49	0.548	7.26e-07	1.93e-06	-2.09	37.1	5e-05	-3.22	-1.61	-2.31 : 46219.1	-2.11 : 46223.5	-2.0 : 46224.6	-0.978 : 46227.9	-0.845 : 46225.7	-0.749 : 46228.10	-0.748 : 46220.2	-0.634 : 46221.3	-0.354 : 46226.8	-0.31 : 46222.4	67948	0	0	NaN	NaN	1	0	0.261966	0	0	-2.38393	0	0
ENSMUSG00000025810	NRP1		NRP1	B	neuropilin 1	semaphorin receptor complex|extracellular space|early endosome|cytosol|neurofilament|plasma membrane|plasma membrane|cell surface|integral component of membrane|axon|growth cone|cytoplasmic vesicle|neuronal cell body|receptor complex|sorting endosome|	angiogenesis|angiogenesis|patterning of blood vessels|neuron migration|positive regulation of endothelial cell proliferation|sprouting angiogenesis|cell migration involved in sprouting angiogenesis|cell adhesion|signal transduction|cell-cell signaling|axon guidance|axon guidance|axonal fasciculation|response to wounding|organ morphogenesis|positive regulation of endothelial cell migration|positiv…	vascular endothelial growth factor-activated receptor activity|vascular endothelial growth factor-activated receptor activity|protein binding|heparin binding|coreceptor activity|semaphorin receptor activity|growth factor binding|growth factor binding|cytokine binding|vascular endothelial growth factor binding|metal ion binding|	10	1	26.4	0.0725	2.12e-07	3.31e-08	-1.05	37.5	5e-05	-2.53	-0.7	-2.12 : 69416.8	-1.21 : 69411.3	-1.12 : 69414.6	-0.942 : 69417.9	-0.931 : 69410.2	-0.894 : 69415.7	-0.848 : 69413.5	-0.756 : 69418.10	-0.639 : 69412.4	-0.608 : 69409.1	18186	0	0	NaN	1	1	0	0.236557	0	0	-1.47519	0	0
ENSMUSG00000021796	BMPR1A		BMPR1A	B	bone morphogenetic protein receptor, type IA	plasma membrane|plasma membrane|caveola|integral component of membrane|dendrite|neuronal cell body|	in utero embryonic development|mesoderm formation|somitogenesis|Mullerian duct regression|positive regulation of mesenchymal cell proliferation|endocardial cushion formation|transcription from RNA polymerase II promoter|protein phosphorylation|immune response|transforming growth factor beta receptor signaling pathway|ectoderm development|dorsal/ventral axis specification|positive regulation of pa…	sequence-specific DNA binding RNA polymerase II transcription factor activity|protein serine/threonine kinase activity|transmembrane receptor protein serine/threonine kinase activity|receptor signaling protein serine/threonine kinase activity|transforming growth factor beta-activated receptor activity|protein binding|ATP binding|protein homodimerization activity|SMAD binding|metal ion binding|	10	0.6	13.4	0.228	2.11e-07	5.3e-08	-2.45	36	6e-05	-3.44	-1.12	-2.68 : 56314.7	-1.68 : 56309.2	-1.67 : 56310.3	-1.21 : 56316.9	-0.865 : 56315.8	-0.858 : 56313.6	-0.789 : 56312.5	-0.747 : 56308.1	-0.587 : 56311.4	-0.557 : 56317.10	12166	0	0	NaN	NaN	1	0	0.47673	0	0	1.03389	0	0
ENSMUSG00000013663	PTEN		PTEN	B	phosphatase and tensin homolog	nucleus|cytoplasm|cytoplasm|mitochondrion|cytosol|plasma membrane|cytoplasmic side of plasma membrane|PML body|myelin sheath adaxonal region|cell projection|neuron projection|dendritic spine|Schmidt-Lanterman incisure|postsynaptic membrane|	regulation of cyclin-dependent protein serine/threonine kinase activity|angiogenesis|negative regulation of protein phosphorylation|regulation of B cell apoptotic process|protein dephosphorylation|protein dephosphorylation|phospholipid metabolic process|phosphatidylinositol biosynthetic process|apoptotic process|activation of mitotic anaphase-promoting complex activity|epidermal growth factor rec…	magnesium ion binding|phosphatidylinositol-3-phosphatase activity|phosphoprotein phosphatase activity|protein serine/threonine phosphatase activity|protein tyrosine phosphatase activity|platelet-derived growth factor receptor binding|protein binding|protein tyrosine/serine/threonine phosphatase activity|lipid binding|anaphase-promoting complex binding|phosphatidylinositol-3,4,5-trisphosphate 3-ph…	10	3.3	202	1e-05	2.81e-05	6.32e-06	-1.5	36	6e-05	-2.31	-1.01	-1.7 : 173901.9	-1.61 : 173896.4	-1.29 : 173895.3	-1.29 : 173902.10	-1.11 : 173893.1	-0.997 : 173900.8	-0.814 : 173894.2	-0.74 : 173897.5	-0.432 : 173898.6	0.511 : 173899.7	19211	0	0	NaN	NaN	1	0	0.356597	0	0	-3.9797	0	0
ENSMUSG00000041459	TARDBP		TARDBP	B	TAR DNA binding protein	nucleus|	regulation of transcription, DNA-templated|transcription from RNA polymerase II promoter|mRNA processing|cell death|RNA splicing|negative regulation by host of viral transcription|3'-UTR-mediated mRNA stabilization|	nucleotide binding|double-stranded DNA binding|sequence-specific DNA binding transcription factor activity|RNA binding|mRNA 3'-UTR binding|protein binding|identical protein binding|poly(A) RNA binding|	8	-5.4	101	2e-05	0.000322	0.000905	-3.17	36.2	6e-05	-5.27	-1.55	-3.28 : 137000.9	-1.84 : 136992.1	-1.55 : 136996.5	-0.975 : 137001.10	-0.578 : 136999.8	-0.402 : 136998.7	-0.29 : 136994.3	0.132 : 136995.4			230908	0	-1	NaN	NaN	NaN	NaN	0.32035	0	0	-5.93769	0	0
ENSMUSG00000090100	TTBK2		TTBK2	B	tau tubulin kinase 2	extracellular space|nucleus|centriole|cytosol|ciliary transition zone|ciliary basal body|	smoothened signaling pathway|cell death|peptidyl-serine phosphorylation|cilium assembly|	protein serine/threonine kinase activity|protein binding|ATP binding|	10	-0.2	0.422	0.862	0.000242	0.00289	-2.92	35.3	6e-05	-4.82	-2.49	-3.01 : 207194.3	-2.96 : 207192.1	-2.91 : 207197.6	-1.75 : 207201.10	-1.59 : 207199.8	-0.809 : 207195.4	-0.319 : 207198.7	-0.0739 : 207193.2	-0.0199 : 207200.9	0.051 : 207196.5	140810	0	0	NaN	1	1	0	0.797986	1	0	-6.30215	1	1
ENSMUSG00000020513	TUBD1		TUBD1	B	tubulin, delta 1	nucleus|cytoplasm|centriole|microtubule|	GTP catabolic process|microtubule-based process|multicellular organismal development|spermatogenesis|cell differentiation|protein polymerization|	GTPase activity|structural constituent of cytoskeleton|GTP binding|	10	-1.1	11.7	0.25	9.6e-07	3.14e-06	-2.53	35.9	6e-05	-3.93	-1.88	-2.73 : 30231.10	-2.52 : 30229.8	-1.84 : 30228.7	-1.38 : 30222.1	-0.987 : 30227.6	-0.868 : 30224.3	-0.714 : 30223.2	-0.549 : 30226.5	-0.5 : 30225.4	-0.176 : 30230.9	56427	0	0	NaN	NaN	1	0	0.586123	0	0	-4.3274	1	0
ENSMUSG00000038965	UBE2L3		UBE2L3	B	ubiquitin-conjugating enzyme E2L 3	ubiquitin ligase complex|nucleus|cytoplasm|extracellular vesicular exosome|	protein polyubiquitination|transcription, DNA-templated|regulation of transcription, DNA-templated|regulation of transcription, DNA-templated|cellular protein modification process|ubiquitin-dependent protein catabolic process|cell proliferation|protein ubiquitination|protein K11-linked ubiquitination|cellular response to steroid hormone stimulus|cellular response to glucocorticoid stimulus|	transcription coactivator activity|ubiquitin-protein transferase activity|ubiquitin-protein transferase activity|ubiquitin-protein transferase activity|protein binding|ATP binding|acid-amino acid ligase activity|enzyme binding|ubiquitin protein ligase binding|poly(A) RNA binding|	10	-3	37.4	0.0222	0.000515	7.83e-05	-2.9	36.2	6e-05	-4.37	-1.61	-3.07 : 103904.4	-2.29 : 103906.6	-1.78 : 103907.7	-1.49 : 103908.8	-1.26 : 103909.9	-0.924 : 103901.1	-0.761 : 103902.2	-0.481 : 103903.3	0.132 : 103910.10	0.784 : 103905.5	22195	0	0	NaN	NaN	1	0	0.339273	0	0	-4.46363	0	0
ENSMUSG00000093575	GM20695			D	N/A	None	None	None	10	0	0	0.955	0.0686	0.0965	-3.35	38.2	7e-05	-5.79	-2.46	-3.46 : 136989.8	-2.67 : 136991.10	-2.21 : 136990.9	-0.253 : 136984.3	-0.178 : 136987.6	-0.0983 : 136983.2	-0.0965 : 136986.5	-0.00949 : 136982.1	0.00811 : 136985.4	0.622 : 136988.7	NaN	9	0	NaN	NaN	NaN	NaN	NaN	NaN	NaN	NaN	NaN	NaN
ENSMUSG00000030990	PGAP2		PGAP2	D	post-GPI attachment to proteins 2	Golgi membrane|nucleus|endoplasmic reticulum membrane|integral component of membrane|	GPI anchor biosynthetic process|protein transport|signal transduction in response to DNA damage|intrinsic apoptotic signaling pathway in response to DNA damage by p53 class mediator|negative regulation of intrinsic apoptotic signaling pathway in response to DNA damage|	protein transporter activity|	10	-0.7	2.37	0.751	1.7e-05	0.000238	-3.2	41.1	7e-05	-4.79	-1.43	-3.4 : 90041.9	-1.92 : 90040.8	-1.87 : 90039.7	-1.35 : 90036.4	-1.27 : 90035.3	-0.666 : 90034.2	-0.659 : 90033.1	-0.327 : 90037.5	-0.307 : 90038.6	-0.0635 : 90042.10	233575	0	0	NaN	NaN	1	0	0.330213	0	0	-2.7913	0	0
ENSMUSG00000022052	PPP2R2A		PPP2R2A	B	protein phosphatase 2, regulatory subunit B, alpha	protein phosphatase type 2A complex|nucleoplasm|cytosol|	G2/M transition of mitotic cell cycle|nuclear-transcribed mRNA catabolic process, nonsense-mediated decay|mitotic cell cycle|protein dephosphorylation|mitotic nuclear envelope reassembly|signal transduction|gene expression|RNA metabolic process|mRNA metabolic process|response to morphine|regulation of catalytic activity|regulation of catalytic activity|	protein serine/threonine phosphatase activity|protein serine/threonine phosphatase activity|protein binding|protein phosphatase type 2A regulator activity|	10	-0.6	4.61	0.475	3.27e-05	1.24e-05	-1.9	34.4	7e-05	-2.95	-1.3	-2.02 : 4428.5	-2.01 : 4426.3	-1.51 : 4431.8	-1.45 : 4427.4	-1.22 : 4432.9	-0.78 : 4424.1	-0.547 : 4429.6	-0.463 : 4430.7	-0.379 : 4425.2	0.316 : 4433.10	71978	0	0	NaN	NaN	1	0	0.386967	0	0	-4.18353	0	0
ENSMUSG00000004768	RAB23		RAB23	C	RAB23, member RAS oncogene family	cytoplasm|autophagic vacuole|plasma membrane|endosome membrane|phagocytic vesicle membrane|phagocytic vesicle|extracellular vesicular exosome|	autophagic vacuole assembly|GTP catabolic process|cellular defense response|small GTPase mediated signal transduction|regulation of smoothened signaling pathway|protein transport|spinal cord dorsal/ventral patterning|embryonic digit morphogenesis|negative regulation of transcription factor import into nucleus|negative regulation of proteolysis|craniofacial suture morphogenesis|	GTPase activity|GTP binding|	10	-2.2	7.71	0.408	0.00819	0.00255	-2.94	48.6	7e-05	-4.53	-1.48	-3.07 : 41989.7	-1.89 : 41988.6	-1.81 : 41983.1	-1.54 : 41987.5	-1.47 : 41990.8	-0.938 : 41985.3	-0.366 : 41992.10	-0.0433 : 41986.4	1.12 : 41991.9	1.41 : 41984.2	19335	0	0	NaN	1	1	0	0.388035	0	0	-3.34462	0	0
ENSMUSG00000047407	TGIF1		TGIF1	B	TGFB-induced factor homeobox 1	nucleoplasm|	negative regulation of transcription from RNA polymerase II promoter|negative regulation of transcription from RNA polymerase II promoter|negative regulation of transcription from RNA polymerase II promoter|neural tube closure|transcription, DNA-templated|transcription initiation from RNA polymerase II promoter|transforming growth factor beta receptor signaling pathway|multicellular organismal de…	RNA polymerase II core promoter proximal region sequence-specific DNA binding|RNA polymerase II core promoter proximal region sequence-specific DNA binding transcription factor activity involved in negative regulation of transcription|RNA polymerase II core promoter proximal region sequence-specific DNA binding transcription factor activity involved in negative regulation of transcription|chromat…	10	-1.1	21.4	0.143	5.78e-06	3.23e-05	-2.16	34.6	7e-05	-3.34	-1.61	-2.39 : 142566.2	-2.16 : 142573.9	-1.85 : 142565.1	-1.29 : 142572.8	-0.868 : 142568.4	-0.788 : 142570.6	-0.762 : 142569.5	-0.595 : 142571.7	-0.157 : 142574.10	-0.0802 : 142567.3	21815	0	0	NaN	NaN	1	0	0.27779	0	0	-10.706	1	0
ENSMUSG00000049904	TMEM17		TMEM17	B	transmembrane protein 17	integral component of membrane|ciliary transition zone|TCTN-B9D complex|ciliary membrane|	smoothened signaling pathway|cilium assembly|	None	10	0.6	4.23	0.498	0.00249	0.00259	-2.91	34.6	7e-05	-4.79	-2.14	-3.05 : 202805.6	-2.59 : 202808.9	-2.19 : 202806.7	-1.65 : 202804.5	-1.12 : 202803.4	-0.945 : 202801.2	-0.156 : 202802.3	-0.0191 : 202800.1	0.0912 : 202807.8	0.24 : 202809.10	103765	0	0	NaN	NaN	1	0	0.646193	0	1	-2.77922	0	0
ENSMUSG00000034343	UBE2F		UBE2F	B	ubiquitin-conjugating enzyme E2F (putative)	None	protein neddylation|protein neddylation|	protein binding|ATP binding|NEDD8 ligase activity|	10	0.4	6.02	0.4	5.39e-06	4.38e-06	-1.57	34.4	7e-05	-2.47	-1.16	-1.91 : 37593.7	-1.5 : 37595.9	-1.49 : 37592.6	-1.44 : 37594.8	-1.34 : 37589.3	-1.11 : 37587.1	-0.764 : 37596.10	-0.477 : 37591.5	-0.465 : 37590.4	0.0596 : 37588.2	67921	0	0	NaN	NaN	1	0	0.454763	0	0	-4.63042	0	0
ENSMUSG00000013160	ATP6V0D1		ATP6V0D1	B	ATPase, H+ transporting, lysosomal 38kDa, V0 subunit d1	lysosomal membrane|early endosome|centrosome|synaptic vesicle|endosome membrane|membrane|apical plasma membrane|vacuolar proton-transporting V-type ATPase complex|vacuolar proton-transporting V-type ATPase complex|phagocytic vesicle membrane|proton-transporting V-type ATPase, V0 domain|axon terminus|extracellular vesicular exosome|	cellular iron ion homeostasis|activation of signaling protein activity involved in unfolded protein response|brain development|insulin receptor signaling pathway|ATP hydrolysis coupled proton transport|proton transport|endoplasmic reticulum unfolded protein response|transferrin transport|cilium assembly|cellular protein metabolic process|interaction with host|transmembrane transport|phagosome mat…	protein binding|hydrogen-exporting ATPase activity, phosphorylative mechanism|protein complex binding|	10	-3.4	70.2	0.0009	0.000398	0.00407	-3.43	34.2	8e-05	-6.16	-1.6	-3.52 : 83202.8	-1.78 : 83196.2	-1.64 : 83200.6	-0.834 : 83198.4	-0.482 : 83197.3	-0.304 : 83195.1	-0.242 : 83199.5	-0.217 : 83204.10	-0.0924 : 83201.7	0.0996 : 83203.9	11972	0	-1	NaN	NaN	NaN	NaN	0.24931	0	0	-11.8766	1	1
ENSMUSG00000055839	ELOB	TCEB2	ELOB	D	transcription elongation factor B (SIII), polypeptide 2 (18kDa, elongin B)	nucleoplasm|cytosol|Cul2-RING ubiquitin ligase complex|Cul5-RING ubiquitin ligase complex|extracellular vesicular exosome|elongin complex|	transcription from RNA polymerase II promoter|transcription elongation from RNA polymerase II promoter|protein complex assembly|gene expression|viral process|protein ubiquitination|positive regulation of viral transcription|regulation of transcription from RNA polymerase II promoter in response to hypoxia|cellular response to hypoxia|	protein binding|ubiquitin protein ligase binding|	10	-4.3	139	1e-05	0.00731	0.0497	-3.95	36.3	8e-05	-7.03	-2.22	-4.08 : 179385.2	-2.51 : 179387.4	-1.88 : 179392.9	-1.05 : 179388.5	-0.711 : 179390.7	-0.325 : 179384.1	-0.219 : 179393.10	-0.0402 : 179386.3	0.161 : 179389.6	0.364 : 179391.8	67673	0	-1	NaN	NaN	NaN	NaN	NaN	NaN	NaN	NaN	1	0
ENSMUSG00000050382	KIF7		KIF7	B	kinesin family member 7	kinesin complex|cilium|	microtubule-based movement|metabolic process|metabolic process|negative regulation of smoothened signaling pathway|positive regulation of smoothened signaling pathway|	microtubule motor activity|protein binding|ATP binding|microtubule binding|	10	-0.3	0.415	0.863	1.77e-06	1.3e-05	-1.78	34.2	8e-05	-2.83	-1.18	-2.07 : 74101.8	-1.62 : 74099.6	-1.56 : 74098.5	-1.31 : 74103.10	-1.03 : 74102.9	-0.907 : 74100.7	-0.842 : 74096.3	-0.388 : 74094.1	-0.376 : 74097.4	-0.161 : 74095.2	16576	2	0	NaN	1	1	0	0.470175	0	0	-2.71573	0	0
ENSMUSG00000020397	MED7		MED7	C	mediator complex subunit 7	nucleus|nucleoplasm|transcription factor complex|mitochondrion|mediator complex|nuclear membrane|	regulation of transcription from RNA polymerase II promoter|transcription initiation from RNA polymerase II promoter|gene expression|stem cell maintenance|	RNA polymerase II transcription cofactor activity|transcription coactivator activity|protein binding|	10	-2	35.6	0.0283	0.000276	0.000324	-3.13	47.4	8e-05	-4.85	-1.6	-3.26 : 189107.2	-2.18 : 189112.7	-1.29 : 189113.8	-1.2 : 189111.6	-1.17 : 189106.1	-1.12 : 189114.9	-0.726 : 189109.4	-0.234 : 189108.3	-0.01 : 189110.5	0.378 : 189115.10	66213	0	0	NaN	NaN	1	0	0.68019	0	1	-1.43734	0	0
ENSMUSG00000025024	SMNDC1		SMNDC1	B	survival motor neuron domain containing 1	nucleus|spliceosomal complex|cytoplasm|Cajal body|nuclear speck|intermediate filament cytoskeleton|	RNA splicing, via transesterification reactions|mRNA processing|apoptotic process|RNA splicing|	protein binding|poly(A) RNA binding|	10	-3.8	77.1	0.00037	1.88e-05	2.59e-05	-2.15	34.2	8e-05	-3.14	-1.11	-2.4 : 32474.1	-1.75 : 32476.3	-1.32 : 32477.4	-1.3 : 32482.9	-1.21 : 32481.8	-1.12 : 32478.5	-0.83 : 32480.7	-0.627 : 32483.10	-0.307 : 32475.2	0.238 : 32479.6	76479	0	-1	NaN	NaN	NaN	NaN	0.43304	0	0	-5.66045	0	0
ENSMUSG00000021771	VDAC2		VDAC2	A	voltage-dependent anion channel 2	nucleus|mitochondrion|mitochondrial outer membrane|mitochondrial inner membrane|mitochondrial nucleoid|pore complex|extracellular vesicular exosome|	anion transport|negative regulation of protein polymerization|regulation of anion transport|transmembrane transport|negative regulation of intrinsic apoptotic signaling pathway|	nucleotide binding|protein binding|voltage-gated anion channel activity|porin activity|	10	-1.7	14.4	0.182	1.2e-05	4.75e-07	-1.46	47.7	8e-05	-2.34	-1.09	-1.82 : 115061.9	-1.52 : 115059.7	-1.46 : 115062.10	-1.43 : 115058.6	-1.26 : 115055.3	-1.25 : 115057.5	-1.23 : 115060.8	-0.93 : 115053.1	-0.896 : 115054.2	0.434 : 115056.4	22334	0	0	NaN	NaN	1	0	0.36099	0	0	-9.00918	0	1
ENSMUSG00000057649	BRD9		BRD9	C	bromodomain containing 9	cellular_component|	transcription, DNA-templated|regulation of transcription, DNA-templated|biological_process|chromatin modification|	nucleic acid binding|lysine-acetylated histone binding|	10	0.7	6.75	0.451	1.48e-05	3.22e-06	-1.89	42.3	0.0001	-2.95	-1.44	-2.14 : 207587.6	-1.89 : 207591.10	-1.72 : 207589.8	-1.7 : 207583.2	-1.5 : 207588.7	-1.46 : 207585.4	-0.71 : 207584.3	-0.504 : 207586.5	-0.481 : 207582.1	0.275 : 207590.9	105246	0	0	NaN	NaN	1	0	0.501753	0	0	-4.60421	0	0
ENSMUSG00000078515	DDI2		DDI2	B	DNA-damage inducible 1 homolog 2 (S. cerevisiae)	None	proteolysis|	aspartic-type endopeptidase activity|	10	-1.4	21.1	0.152	4.62e-05	7.83e-05	-2.25	32.8	0.0001	-3.32	-1.37	-2.47 : 42704.1	-1.79 : 42707.4	-1.73 : 42706.3	-1.44 : 42709.6	-1.37 : 42705.2	-0.975 : 42713.10	-0.641 : 42712.9	-0.481 : 42710.7	-0.00626 : 42711.8	0.0782 : 42708.5	68817	0	0	NaN	NaN	1	0	NaN	NaN	NaN	-1.17638	0	0
ENSMUSG00000022561	GPAA1		GPAA1	C	glycosylphosphatidylinositol anchor attachment 1	endoplasmic reticulum membrane|membrane|GPI-anchor transamidase complex|	protein complex assembly|C-terminal protein lipidation|protein retention in ER lumen|attachment of GPI anchor to protein|attachment of GPI anchor to protein|post-translational protein modification|cellular protein metabolic process|	GPI-anchor transamidase activity|protein binding|tubulin binding|GPI anchor binding|	10	-0.9	19.7	0.155	0.0102	0.0256	-3.04	43.7	0.0001	-5.11	-1.9	-3.13 : 165468.6	-2.22 : 165472.10	-2.1 : 165464.2	-1.61 : 165471.9	-0.775 : 165467.5	-0.363 : 165469.7	-0.051 : 165466.4	-0.0162 : 165463.1	0.153 : 165470.8	0.371 : 165465.3	14731	0	0	NaN	NaN	1	0	0.208031	0	0	-7.32242	1	0
ENSMUSG00000053436	MAPK14		MAPK14	C	mitogen-activated protein kinase 14	spindle pole|nucleus|nucleoplasm|cytoplasm|mitochondrion|cytosol|extracellular vesicular exosome|	DNA damage checkpoint|activation of MAPK activity|cell morphogenesis|cartilage condensation|angiogenesis|chondrocyte differentiation|toll-like receptor signaling pathway|MyD88-dependent toll-like receptor signaling pathway|MyD88-independent toll-like receptor signaling pathway|glucose metabolic process|transcription, DNA-templated|regulation of transcription from RNA polymerase II promoter|apopto…	protein serine/threonine kinase activity|MAP kinase activity|MAP kinase kinase activity|protein binding|ATP binding|NFAT protein binding|	10	-0.7	21	0.139	1.62e-07	5.53e-08	-1.16	42.3	0.0001	-1.75	-0.88	-1.36 : 68621.3	-1.27 : 68627.9	-1.17 : 68623.5	-1.08 : 68626.8	-1.07 : 68622.4	-1.05 : 68624.6	-0.984 : 68625.7	-0.958 : 68628.10	-0.824 : 68619.1	-0.552 : 68620.2	26416	0	0	NaN	NaN	1	0	0.29122	0	0	-5.07609	1	0
ENSMUSG00000064127	MED14		MED14	C	mediator complex subunit 14	nucleus|nucleoplasm|membrane|mediator complex|	regulation of transcription from RNA polymerase II promoter|transcription initiation from RNA polymerase II promoter|transcription initiation from RNA polymerase II promoter|gene expression|stem cell maintenance|intracellular steroid hormone receptor signaling pathway|androgen receptor signaling pathway|positive regulation of transcription, DNA-templated|positive regulation of transcription from …	RNA polymerase II transcription cofactor activity|transcription cofactor activity|transcription coactivator activity|receptor activity|ligand-dependent nuclear receptor transcription coactivator activity|vitamin D receptor binding|thyroid hormone receptor binding|	9	-3.9	88.7	5e-05	0.000104	6.25e-05	-2.4	42	0.0001	-3.6	-2.01	-2.48 : 170888.3	-2.46 : 170893.8	-2.38 : 170887.2	-1.25 : 170889.4	-1.24 : 170890.5	-0.974 : 170895.10	-0.606 : 170892.7	-0.37 : 170886.1	0.436 : 170894.9		26896	0	-1	NaN	NaN	NaN	NaN	0.490196	0	0	-7.54867	0	0
ENSMUSG00000009073	NF2		NF2	B	neurofibromin 2 (merlin)	nucleus|nucleolus|cytoplasm|early endosome|cytoskeleton|plasma membrane|adherens junction|membrane|extrinsic component of membrane|lamellipodium|cortical actin cytoskeleton|filopodium membrane|cleavage furrow|ruffle membrane|perinuclear region of cytoplasm|	mesoderm formation|negative regulation of cell-matrix adhesion|negative regulation of protein kinase activity|ectoderm development|negative regulation of DNA replication|negative regulation of cell proliferation|negative regulation of cell proliferation|Schwann cell proliferation|negative regulation of cell-cell adhesion|actin cytoskeleton organization|negative regulation of cell migration|regula…	actin binding|protein binding|	10	3	211	1e-05	6.95e-06	3.61e-06	-1.27	32.8	0.0001	-1.86	-0.96	-1.46 : 211237.3	-1.39 : 211243.9	-1.28 : 211238.4	-1.24 : 211244.10	-1.04 : 211242.8	-1.04 : 211235.1	-0.703 : 211236.2	-0.585 : 211241.7	-0.483 : 211239.5	0.0964 : 211240.6	18016	0	0	NaN	NaN	1	0	0.5309	0	0	-2.78042	0	0
ENSMUSG00000003421	NOSIP		NOSIP	C	nitric oxide synthase interacting protein	Golgi membrane|nucleus|cytoplasm|cytosol|	negative regulation of catalytic activity|small molecule metabolic process|nitric oxide metabolic process|regulation of nitric-oxide synthase activity|negative regulation of nitric-oxide synthase activity|	protein binding|poly(A) RNA binding|	10	-1	8.64	0.373	6.57e-06	2.72e-05	-2.59	44.7	0.0001	-3.99	-1.69	-2.78 : 208355.5	-2.35 : 208354.4	-1.57 : 208358.8	-1.42 : 208353.3	-1.39 : 208356.6	-1.3 : 208360.10	-1.23 : 208357.7	-0.641 : 208359.9	-0.324 : 208352.2	0.097 : 208351.1	66394	0	0	NaN	NaN	1	0	0.290493	0	0	-1.35616	0	0
ENSMUSG00000020612	PRKAR1A		PRKAR1A	B	protein kinase, cAMP-dependent, regulatory, type I, alpha	cytosol|plasma membrane|cAMP-dependent protein kinase complex|membrane|AMP-activated protein kinase complex|neuromuscular junction|protein complex|	mesoderm formation|energy reserve metabolic process|regulation of transcription from RNA polymerase II promoter|water transport|female meiotic division|signal transduction|epidermal growth factor receptor signaling pathway|activation of phospholipase C activity|blood coagulation|fibroblast growth factor receptor signaling pathway|activation of protein kinase A activity|intracellular signal transd…	cAMP-dependent protein kinase inhibitor activity|protein binding|cAMP-dependent protein kinase regulator activity|cAMP binding|ubiquitin protein ligase binding|protein kinase A catalytic subunit binding|	10	-1	28.7	0.0556	0.00292	0.00297	-2.9	32.8	0.0001	-4.87	-2.14	-3.04 : 106700.1	-2.62 : 106705.6	-1.99 : 106702.3	-1.8 : 106708.9	-1.02 : 106704.5	-0.599 : 106707.8	-0.372 : 106703.4	0.0763 : 106709.10	0.129 : 106701.2	0.245 : 106706.7	19084	0	0	NaN	NaN	1	0	0.398467	0	0	-0.07945	0	1
ENSMUSG00000070934	RRAGA		RRAGA	B	Ras-related GTP binding A	nucleus|cytoplasm|lysosome|lysosomal membrane|Golgi apparatus|intracellular membrane-bounded organelle|	apoptotic process|cell death|modulation by virus of host morphology or physiology|positive regulation of TOR signaling|cellular protein localization|positive regulation of cytolysis|cellular response to amino acid stimulus|	protein binding|GTP binding|protein homodimerization activity|protein heterodimerization activity|phosphoprotein binding|	10	-2.3	45.7	0.0141	0.000694	0.000222	-2.8	33.6	0.0001	-4.3	-1.92	-2.97 : 61289.9	-2.47 : 61288.8	-1.82 : 61287.7	-1.29 : 61285.5	-1.2 : 61286.6	-0.914 : 61281.1	-0.876 : 61283.3	-0.0806 : 61282.2	-0.0463 : 61284.4	1.19 : 61290.10	68441	0	0	NaN	NaN	1	0	0.411623	0	0	-3.52498	0	0
ENSMUSG00000021963	SAP18		SAP18	B	Sin3A-associated protein, 18kDa	histone deacetylase complex|nucleus|cytoplasm|nuclear speck|exon-exon junction complex|ASAP complex|	regulation of alternative mRNA splicing, via spliceosome|regulation of alternative mRNA splicing, via spliceosome|transcription, DNA-templated|regulation of transcription from RNA polymerase II promoter|mRNA processing|RNA splicing|positive regulation of apoptotic process|negative regulation of mRNA splicing, via spliceosome|	transcription corepressor activity|protein binding|poly(A) RNA binding|	4	-0.5	1.16	0.759	0.0168	0.039	-3.61	33.2	0.0001	-6.92	-3	-3.65 : 156675.5	-1.88 : 156676.6	-0.631 : 156678.8	0.0483 : 156671.1							20220	6	0	NaN	NaN	1	0	0.293053	0	0	-3.48127	0	0
ENSMUSG00000021598	MED10		MED10	B	mediator complex subunit 10	nucleoplasm|mediator complex|	transcription initiation from RNA polymerase II promoter|gene expression|stem cell maintenance|positive regulation of transcription from RNA polymerase II promoter|	RNA polymerase II transcription cofactor activity|	10	-2.7	56.7	0.00313	2.88e-05	0.000959	-2.6	32.2	0.00012	-4.18	-1.97	-2.73 : 144554.8	-2.63 : 144547.1	-1.72 : 144549.3	-1.38 : 144555.9	-1.32 : 144551.5	-1.16 : 144556.10	-0.501 : 144548.2	-0.169 : 144553.7	-0.102 : 144552.6	-0.0747 : 144550.4	28077	0	-1	NaN	NaN	NaN	NaN	0.310843	0	0	-1.24773	0	0
ENSMUSG00000017721	PIGT		PIGT	C	phosphatidylinositol glycan anchor biosynthesis, class T	endoplasmic reticulum membrane|membrane|cytoplasmic membrane-bounded vesicle|integral component of endoplasmic reticulum membrane|GPI-anchor transamidase complex|	C-terminal protein lipidation|attachment of GPI anchor to protein|neuron differentiation|post-translational protein modification|cellular protein metabolic process|neuron apoptotic process|	GPI-anchor transamidase activity|protein binding|	10	-1.1	30.3	0.0503	9.72e-05	3.76e-05	-2.42	40.9	0.00012	-3.77	-1.8	-2.61 : 1073.2	-2.34 : 1074.3	-2.05 : 1077.6	-1.16 : 1075.4	-1.11 : 1079.8	-1.06 : 1081.10	-0.753 : 1080.9	-0.579 : 1076.5	-0.0809 : 1078.7	0.431 : 1072.1	78928	0	0	NaN	NaN	1	0	0.264215	0	0	-3.11129	0	0
ENSMUSG00000034216	VPS18		VPS18	C	vacuolar protein sorting 18 homolog (S. cerevisiae)	lysosomal membrane|early endosome|actin filament|HOPS complex|late endosome membrane|	intracellular protein transport|endosome organization|lysosome organization|vesicle-mediated transport|	actin binding|protein binding|metal ion binding|	10	0.6	6.4	0.468	3.38e-06	7.77e-07	-1.9	40.7	0.00012	-2.87	-1.26	-2.08 : 82280.7	-1.94 : 82281.8	-1.46 : 82277.4	-1.37 : 82282.9	-1.3 : 82278.5	-1.27 : 82276.3	-0.85 : 82279.6	-0.757 : 82283.10	-0.711 : 82275.2	0.0838 : 82274.1	228545	0	0	NaN	NaN	1	0	0.252807	0	0	-1.75045	0	0
ENSMUSG00000032512	WDR48		WDR48	B	WD repeat domain 48	nucleus|lysosome|intracellular membrane-bounded organelle|	viral process|protein deubiquitination|	protein binding|	10	-0.8	9.72	0.286	9.67e-06	0.000281	-2.64	32.3	0.00012	-4.17	-2	-2.74 : 139174.8	-2.7 : 139172.6	-1.69 : 139171.5	-1.51 : 139176.10	-1.39 : 139170.4	-1.19 : 139168.2	-0.498 : 139173.7	-0.364 : 139167.1	-0.151 : 139169.3	-0.0758 : 139175.9	67561	0	0	NaN	NaN	1	0	0.76865	1	0	0.0600706	0	0
ENSMUSG00000053113	SOCS3		SOCS3	C	suppressor of cytokine signaling 3	cytosol|	negative regulation of protein kinase activity|JAK-STAT cascade|protein ubiquitination|cytokine-mediated signaling pathway|regulation of growth|negative regulation of apoptotic process|positive regulation of cell differentiation|negative regulation of insulin receptor signaling pathway|interferon-gamma-mediated signaling pathway|regulation of interferon-gamma-mediated signaling pathway|type I int…	protein kinase inhibitor activity|protein binding|	10	0.9	29.3	0.0564	3.56e-06	4.12e-05	-4.13	40.5	0.00013	-6.03	-1.41	-4.22 : 41590.6	-1.48 : 41589.5	-1.43 : 41587.3	-1.41 : 41593.9	-1.28 : 41586.2	-0.692 : 41592.8	-0.622 : 41585.1	-0.56 : 41594.10	-0.217 : 41588.4	-0.123 : 41591.7	12702	0	0	NaN	NaN	1	0	0.214663	0	0	-1.4859	0	0
ENSMUSG00000038774	ASCC3		ASCC3	A	activating signal cointegrator 1 complex subunit 3	intracellular|nucleus|cytoplasm|Golgi apparatus|membrane|	DNA dealkylation involved in DNA repair|transcription, DNA-templated|regulation of transcription, DNA-templated|cell proliferation|DNA duplex unwinding|	protein binding|ATP binding|ATP-dependent 3'-5' DNA helicase activity|poly(A) RNA binding|	10	-1.3	14.8	0.18	0.00373	0.00351	-4.53	46.5	0.00014	-8.47	-3.02	-4.68 : 219052.7	-2.76 : 219053.8	-2.38 : 219047.2	-2.08 : 219046.1	-1.51 : 219051.6	-0.512 : 219050.5	-0.38 : 219048.3	0.0906 : 219049.4	0.23 : 219055.10	0.254 : 219054.9	77987	0	0	NaN	NaN	1	0	0.42896	0	0	NaN	NaN	0
ENSMUSG00000090247	BLOC1S1		BLOC1S1	C	biogenesis of lysosomal organelles complex-1, subunit 1	extracellular space|mitochondrial intermembrane space|mitochondrial matrix|lysosomal membrane|cytosol|BLOC-1 complex|extracellular vesicular exosome|	post-Golgi vesicle-mediated transport|anterograde axon cargo transport|aerobic respiration|peptidyl-lysine acetylation|neuron projection development|melanosome organization|anterograde synaptic vesicle transport|platelet dense granule organization|membrane organization|	protein binding|	10	0.3	1.38	0.829	7.75e-06	0.000284	-2	40.3	0.00014	-3.11	-1.55	-2.15 : 47371.3	-2.04 : 47369.1	-1.81 : 47378.10	-1.81 : 47376.8	-1.51 : 47374.6	-1.33 : 47373.5	-0.786 : 47377.9	-0.291 : 47370.2	-0.167 : 47372.4	-0.0746 : 47375.7	14533	0	0	NaN	NaN	1	0	NaN	NaN	NaN	-0.97746	0	0
ENSMUSG00000020114	CAND1		CAND1	B	cullin-associated and neddylation-dissociated 1	ubiquitin ligase complex|nucleus|cytoplasm|membrane|cullin-RING ubiquitin ligase complex|intracellular membrane-bounded organelle|extracellular vesicular exosome|	SCF complex assembly|protein ubiquitination|cell differentiation|negative regulation of catalytic activity|positive regulation of RNA polymerase II transcriptional preinitiation complex assembly|	protein binding|TBP-class protein binding|	10	0.6	8.99	0.303	1.73e-06	2.42e-06	1.04	32.1	0.00014	0.64	1.68	0.0792 : 206103.1	0.458 : 206112.10	0.519 : 206106.4	0.676 : 206104.2	0.757 : 206107.5	0.777 : 206108.6	0.849 : 206111.9	0.959 : 206105.3	1.15 : 206110.8	1.36 : 206109.7	71902	0	0	NaN	NaN	1	0	0.422783	0	0	-0.286941	0	0
ENSMUSG00000007805	TWIST2		TWIST2	C	twist family bHLH transcription factor 2	nucleus|transcription factor complex|cytoplasm|	negative regulation of transcription from RNA polymerase II promoter|osteoblast differentiation|transcription from RNA polymerase II promoter|negative regulation of cell proliferation|positive regulation of keratinocyte proliferation|negative regulation of tumor necrosis factor production|negative regulation of apoptotic process|negative regulation of DNA binding|negative regulation of myeloid ce…	RNA polymerase II transcription factor binding transcription factor activity|DNA binding|chromatin binding|sequence-specific DNA binding transcription factor activity|protein binding|protein domain specific binding|protein dimerization activity|	10	-0.9	36.3	0.0264	4.37e-07	3.08e-06	1.29	40.4	0.00014	0.89	1.83	0.271 : 132215.5	0.439 : 132219.9	0.81 : 132211.1	0.895 : 132213.3	0.955 : 132214.4	1.03 : 132216.6	1.08 : 132220.10	1.13 : 132212.2	1.42 : 132217.7	1.45 : 132218.8	13345	0	0	NaN	NaN	1	0	0.243157	0	0	-18.2851	1	0
ENSMUSG00000094472	GM21897			D	N/A	None	None	None	5	-7.1	274	1e-05	0.163	0.119	2.87	32.9	0.00016	2.1	5.8	-1.16 : 198813.4	-0.048 : 198811.2	0.607 : 198810.1	1.85 : 198817.8	3.02 : 198814.5						NaN	0	-1	NaN	NaN	NaN	NaN	NaN	NaN	NaN	NaN	NaN	NaN
ENSMUSG00000039047	PIGK		PIGK	D	phosphatidylinositol glycan anchor biosynthesis, class K	endoplasmic reticulum membrane|membrane|integral component of endoplasmic reticulum membrane|GPI-anchor transamidase complex|	protein folding|C-terminal protein lipidation|proteolysis|attachment of GPI anchor to protein|post-translational protein modification|cellular protein metabolic process|	protein disulfide isomerase activity|GPI-anchor transamidase activity|GPI-anchor transamidase activity|cysteine-type endopeptidase activity|protein binding|GPI anchor binding|	10	-1.2	5.52	0.566	0.00292	0.00899	-3.44	33	0.00016	-5.92	-1.43	-3.6 : 137487.6	-1.76 : 137491.10	-1.57 : 137483.2	-1.35 : 137486.5	-0.731 : 137484.3	-0.658 : 137482.1	-0.363 : 137488.7	-0.138 : 137485.4	0.131 : 137489.8	0.6 : 137490.9	329777	0	0	NaN	NaN	1	0	0.47347	0	0	-2.14903	0	0
ENSMUSG00000005566	TRIM28		TRIM28	A	tripartite motif containing 28	nucleus|nucleus|nucleoplasm|nuclear euchromatin|nuclear heterochromatin|	negative regulation of transcription from RNA polymerase II promoter|epithelial to mesenchymal transition|DNA repair|transcription initiation from RNA polymerase II promoter|gene expression|protein ubiquitination|protein sumoylation|protein sumoylation|positive regulation of transcription factor import into nucleus|innate immune response|positive regulation of DNA repair|negative regulation of tr…	DNA binding|sequence-specific DNA binding transcription factor activity|transcription coactivator activity|transcription corepressor activity|protein kinase activity|ubiquitin-protein transferase activity|protein binding|zinc ion binding|ligase activity|ubiquitin protein ligase binding|Krueppel-associated box domain binding|sequence-specific DNA binding|poly(A) RNA binding|chromo shadow domain bi…	10	0.4	2.07	0.56	6.17e-05	1.49e-05	-2.66	46.2	0.00016	-4.06	-2.28	-2.91 : 39907.3	-2.69 : 39910.6	-2.66 : 39914.10	-2.62 : 39913.9	-1.59 : 39911.7	-1.35 : 39912.8	-1.07 : 39909.5	-0.831 : 39905.1	-0.133 : 39908.4	0.511 : 39906.2	21849	0	0	NaN	NaN	1	0	0.256561	0	0	-4.36764	0	0
ENSMUSG00000039133	9330171B17RIK			D	RIKEN cDNA 9330171B17 gene	cellular_component|	biological_process|	molecular_function|	10	-0.3	1.79	0.785	4.14e-07	6.89e-07	-1.64	32.2	0.00018	-2.69	-0.99	-2.07 : 114977.5	-1.75 : 114982.10	-1.41 : 114979.7	-1.27 : 114981.9	-1.23 : 114974.2	-1.11 : 114980.8	-1.06 : 114975.3	-0.74 : 114978.6	-0.731 : 114973.1	-0.472 : 114976.4	100034360	2	0	NaN	NaN	1	0	NaN	NaN	NaN	NaN	NaN	NaN
ENSMUSG00000032412	ATP1B3		ATP1B3	B	ATPase, Na+/K+ transporting, beta 3 polypeptide	plasma membrane|sodium:potassium-exchanging ATPase complex|caveola|melanosome|extracellular vesicular exosome|	transport|potassium ion transport|blood coagulation|ion transmembrane transport|sodium ion transmembrane transport|sodium ion transmembrane transport|leukocyte migration|transmembrane transport|	sodium:potassium-exchanging ATPase activity|	10	-3.9	56.5	0.00321	4.49e-07	1.8e-07	-0.83	31.7	0.00018	-2.44	-0.56	-2.12 : 149882.9	-0.959 : 149880.7	-0.949 : 149878.5	-0.868 : 149881.8	-0.861 : 149876.3	-0.855 : 149874.1	-0.734 : 149877.4	-0.667 : 149875.2	-0.473 : 149883.10	-0.447 : 149879.6	11933	0	-1	NaN	NaN	NaN	NaN	0.37015	0	0	-0.82276	0	1
ENSMUSG00000096197	4930555G01RIK			D	RIKEN cDNA 4930555G01 gene	cellular_component|	biological_process|	molecular_function|	10	-3.6	72.4	0.00159	0.000597	0.00868	-3.02	31.8	0.00019	-4.97	-1.27	-3.2 : 207951.10	-1.89 : 207944.3	-1.5 : 207945.4	-1.25 : 207950.9	-1.19 : 207946.5	-0.373 : 207947.6	-0.178 : 207949.8	-0.137 : 207948.7	-0.124 : 207942.1	0.0528 : 207943.2	108978	9	-1	NaN	NaN	NaN	NaN	NaN	NaN	NaN	3.61303	0	0
ENSMUSG00000060373	HNRNPC		HNRNPC	B	heterogeneous nuclear ribonucleoprotein C (C1/C2)	nuclear chromatin|nucleus|nucleoplasm|spliceosomal complex|cytosol|membrane|protein complex|extracellular vesicular exosome|catalytic step 2 spliceosome|	mRNA splicing, via spliceosome|mRNA splicing, via spliceosome|osteoblast differentiation|RNA splicing|gene expression|ATP-dependent chromatin remodeling|3'-UTR-mediated mRNA stabilization|	nucleotide binding|RNA polymerase II core promoter proximal region sequence-specific DNA binding|RNA polymerase II distal enhancer sequence-specific DNA binding|RNA binding|mRNA 3'-UTR binding|protein binding|poly(U) RNA binding|nucleosomal DNA binding|identical protein binding|poly(A) RNA binding|	10	-3.1	74.3	0.00057	1.42e-06	7.52e-06	-2.13	31.4	0.00019	-3.12	-1.1	-2.37 : 81664.1	-1.63 : 81668.5	-1.46 : 81671.8	-1.24 : 81665.2	-1.21 : 81673.10	-0.873 : 81670.7	-0.828 : 81672.9	-0.42 : 81667.4	-0.283 : 81666.3	-0.251 : 81669.6	15381	0	-1	1	NaN	NaN	NaN	0.28766	0	0	-8.14312	1	0
ENSMUSG00000022817	ITGB5		ITGB5	B	integrin, beta 5	plasma membrane|focal adhesion|integrin complex|cell leading edge|receptor complex|phagocytic vesicle|extracellular vesicular exosome|	antigen processing and presentation of peptide antigen via MHC class I|antigen processing and presentation of exogenous peptide antigen via MHC class I, TAP-dependent|muscle contraction|cell adhesion|integrin-mediated signaling pathway|multicellular organismal development|extracellular matrix organization|antigen processing and presentation of exogenous peptide antigen via MHC class I|	receptor activity|integrin binding|protein binding|	10	-1	15.1	0.212	4.28e-06	4.5e-05	-1.59	31.4	0.00019	-2.48	-1.05	-1.85 : 174604.2	-1.62 : 174610.8	-1.3 : 174607.5	-1.23 : 174612.10	-0.979 : 174605.3	-0.798 : 174608.6	-0.784 : 174603.1	-0.548 : 174606.4	-0.222 : 174609.7	-0.0909 : 174611.9	16419	0	0	NaN	NaN	1	0	0.25154	0	0	0.665502	0	0
ENSMUSG00000036057	PTPN23		PTPN23	B	protein tyrosine phosphatase, non-receptor type 23	nucleus|cytoplasm|endosome|early endosome|cytoplasmic membrane-bounded vesicle|ciliary basal body|extracellular vesicular exosome|	protein transport|regulation of cell migration|peptidyl-tyrosine dephosphorylation|ubiquitin-dependent protein catabolic process via the multivesicular body sorting pathway|cilium morphogenesis|	protein tyrosine phosphatase activity|protein binding|	10	-0.3	0.369	0.871	6.67e-06	3.46e-06	-1.81	31.4	0.00019	-2.7	-0.83	-2.1 : 189015.10	-1.28 : 189007.2	-1.23 : 189008.3	-1.05 : 189010.5	-1.04 : 189009.4	-0.98 : 189011.6	-0.727 : 189012.7	-0.498 : 189013.8	-0.487 : 189014.9	0.0748 : 189006.1	104831	0	0	NaN	NaN	1	0	0.263093	0	0	-2.63829	0	0
ENSMUSG00000013822	ELOF1		ELOF1	C	elongation factor 1 homolog (S. cerevisiae)	nucleus|	transcription, DNA-templated|regulation of transcription, DNA-templated|	metal ion binding|	10	0.7	12.7	0.258	2.19e-07	5.07e-08	0.95	37.6	0.0002	0.66	1.54	0.523 : 168005.4	0.665 : 168011.10	0.695 : 168009.8	0.759 : 168010.9	0.847 : 168002.1	0.852 : 168006.5	0.999 : 168008.7	1.0 : 168007.6	1.05 : 168003.2	1.15 : 168004.3	66126	0	0	NaN	NaN	1	0	0.389733	0	0	-0.365746	0	0
ENSMUSG00000095686	GM3099			D	predicted gene 3099	cellular_component|	biological_process|	molecular_function|	10	-3.6	61.7	0.00447	0.00144	0.0208	-3.02	31.6	0.0002	-4.99	-1.28	-3.2 : 62590.10	-1.89 : 62584.4	-1.5 : 62585.5	-1.25 : 62589.9	-1.19 : 62586.6	-0.373 : 62587.7	-0.137 : 62588.8	-0.107 : 62582.2	0.0306 : 62581.1	0.0528 : 62583.3	100041019	8	-1	NaN	NaN	NaN	NaN	NaN	NaN	NaN	NaN	NaN	NaN
ENSMUSG00000005371	FBXO11		FBXO11	C	F-box protein 11	ubiquitin ligase complex|nucleus|chromosome|nucleolus|cytoplasm|	cellular protein modification process|ubiquitin-dependent protein catabolic process|sensory perception of sound|protein ubiquitination|protein ubiquitination|peptidyl-arginine N-methylation|	ubiquitin-protein transferase activity|protein binding|zinc ion binding|protein-arginine N-methyltransferase activity|	10	1.2	1.88	0.785	1.32e-06	1.07e-05	-2.32	37.2	0.00021	-3.57	-1.69	-2.52 : 213723.9	-2.17 : 213716.2	-2.03 : 213718.4	-1.71 : 213722.8	-0.827 : 213724.10	-0.782 : 213721.7	-0.697 : 213720.6	-0.538 : 213717.3	-0.386 : 213719.5	-0.173 : 213715.1	225055	0	0	NaN	NaN	1	0	0.298237	0	0	-7.6854	1	1
ENSMUSG00000035597	PRPF39		PRPF39	C	pre-mRNA processing factor 39	nucleus|	mRNA processing|RNA splicing|	None	10	-1.1	37.3	0.0242	0.000102	0.000184	-2.39	36.8	0.00022	-3.79	-1.71	-2.56 : 87419.5	-2.18 : 87420.6	-1.95 : 87424.10	-1.81 : 87421.7	-1.78 : 87422.8	-0.551 : 87423.9	-0.429 : 87415.1	-0.389 : 87417.3	0.0371 : 87416.2	0.078 : 87418.4	328110	0	0	NaN	NaN	1	0	0.41896	0	0	0.70816	0	0
ENSMUSG00000042308	SETD1A		SETD1A	A	SET domain containing 1A	nucleus|chromosome|nuclear speck|histone methyltransferase complex|Set1C/COMPASS complex|	transcription, DNA-templated|regulation of transcription, DNA-templated|histone H3-K4 methylation|	nucleotide binding|RNA binding|protein binding|histone methyltransferase activity (H3-K4 specific)|	10	-2.9	51.5	0.00426	2.05e-05	3.18e-06	-1.22	44.5	0.00022	-4.19	-0.68	-3.25 : 160390.4	-1.38 : 160391.5	-1.33 : 160394.8	-1.1 : 160388.2	-0.862 : 160387.1	-0.799 : 160393.7	-0.695 : 160389.3	-0.569 : 160396.10	-0.508 : 160392.6	0.315 : 160395.9	233904	0	-1	NaN	NaN	NaN	NaN	0.442733	0	0	-4.0122	0	0
ENSMUSG00000040843	TIPRL		TIPRL	A	TOR signaling pathway regulator	cytoplasm|intracellular membrane-bounded organelle|	DNA damage checkpoint|negative regulation of protein phosphatase type 2A activity|	protein binding|	10	-1.1	14.1	0.184	4.27e-07	1.42e-06	-2.22	44.4	0.00022	-3.46	-1.53	-2.52 : 107304.5	-2.21 : 107301.2	-1.83 : 107309.10	-1.38 : 107300.1	-1.38 : 107305.6	-1.32 : 107303.4	-1.02 : 107306.7	-0.807 : 107302.3	-0.37 : 107308.9	-0.342 : 107307.8	226591	0	0	NaN	NaN	1	0	0.427823	0	0	0.447819	0	0
ENSMUSG00000014039	PRDM15		PRDM15	C	PR domain containing 15	nucleus|	transcription, DNA-templated|regulation of transcription, DNA-templated|methylation|	DNA binding|methyltransferase activity|metal ion binding|	10	-0.8	12.2	0.269	1.1e-05	3.4e-05	-1.94	35.9	0.00025	-3.03	-1.46	-2.07 : 176588.6	-1.99 : 176589.7	-1.83 : 176585.3	-1.56 : 176591.9	-1.11 : 176592.10	-0.772 : 176583.1	-0.633 : 176587.5	-0.6 : 176590.8	-0.164 : 176584.2	0.0182 : 176586.4	114604	0	0	NaN	NaN	1	0	0.564653	0	0	NaN	NaN	0
ENSMUSG00000021318	GLI3		GLI3	A	GLI family zinc finger 3	nucleus|cytoplasm|cytosol|cilium|mediator complex|nuclear speck|transcriptional repressor complex|primary cilium|	negative regulation of transcription from RNA polymerase II promoter|metanephros development|branching involved in ureteric bud morphogenesis|in utero embryonic development|positive regulation of neuroblast proliferation|transcription, DNA-templated|smoothened signaling pathway|axon guidance|hindgut morphogenesis|heart development|negative regulation of cell proliferation|anterior/posterior patte…	RNA polymerase II core promoter proximal region sequence-specific DNA binding|chromatin binding|sequence-specific DNA binding transcription factor activity|protein binding|beta-catenin binding|histone acetyltransferase binding|histone deacetylase binding|metal ion binding|	10	0.3	1.99	0.567	2.62e-06	3.97e-05	2.36	42.7	0.00026	1.78	3.69	0.0751 : 212996.2	0.334 : 212995.1	0.505 : 213000.6	0.81 : 213002.8	1.42 : 213001.7	1.58 : 213003.9	1.74 : 213004.10	2.06 : 212997.3	2.4 : 212998.4	2.62 : 212999.5	14634	0	0	NaN	1	1	0	0.449967	0	0	0.581133	0	0
ENSMUSG00000079487	MED12		MED12	C	mediator complex subunit 12	nucleus|nucleoplasm|membrane|mediator complex|	neural tube closure|transcription initiation from RNA polymerase II promoter|transcription initiation from RNA polymerase II promoter|heart development|gene expression|oligodendrocyte development|Schwann cell development|stem cell maintenance|negative regulation of Wnt signaling pathway|intracellular steroid hormone receptor signaling pathway|androgen receptor signaling pathway|positive regulatio…	RNA polymerase II distal enhancer sequence-specific DNA binding|RNA polymerase II transcription cofactor activity|RNA polymerase II transcription factor binding transcription factor activity involved in positive regulation of transcription|chromatin binding|transcription cofactor activity|transcription coactivator activity|receptor activity|protein binding|beta-catenin binding|protein C-terminus …	10	-0.5	6.57	0.459	8.76e-06	2.74e-06	-2.16	35.3	0.00027	-3.06	-1.09	-2.39 : 12929.4	-1.59 : 12934.9	-1.38 : 12928.3	-1.34 : 12926.1	-1.26 : 12931.6	-1.06 : 12930.5	-0.709 : 12932.7	-0.592 : 12935.10	-0.497 : 12927.2	0.16 : 12933.8	59024	0	0	NaN	NaN	1	0	0.43207	0	0	-4.86471	0	0
ENSMUSG00000038175	MYLIP		MYLIP	B	myosin regulatory light chain interacting protein	intracellular|cytoplasm|cytoskeleton|plasma membrane|extrinsic component of membrane|	cellular component movement|nervous system development|negative regulation of low-density lipoprotein particle clearance|protein ubiquitination|protein destabilization|regulation of low-density lipoprotein particle receptor catabolic process|cholesterol homeostasis|protein ubiquitination involved in ubiquitin-dependent protein catabolic process|positive regulation of protein catabolic process|	ubiquitin-protein transferase activity|protein binding|cytoskeletal protein binding|zinc ion binding|ligase activity|	10	1.1	54.2	0.00449	3.05e-05	7.64e-06	-1.04	30.9	0.00027	-1.65	-0.67	-1.21 : 92639.7	-1.17 : 92635.3	-1.11 : 92633.1	-0.862 : 92641.9	-0.85 : 92636.4	-0.84 : 92634.2	-0.725 : 92640.8	-0.711 : 92638.6	-0.413 : 92642.10	0.367 : 92637.5	218203	0	0	NaN	NaN	1	0	0.30397	0	0	-4.38862	0	0
ENSMUSG00000001911	NFIX		NFIX	C	nuclear factor I/X (CCAAT-binding transcription factor)	nucleus|	negative regulation of transcription from RNA polymerase II promoter|DNA replication|transcription from RNA polymerase II promoter|cerebellar Purkinje cell layer development|cerebellar granule cell differentiation|positive regulation of transcription from RNA polymerase II promoter|astrocyte differentiation|	DNA binding|sequence-specific DNA binding transcription factor activity|RNA polymerase II distal enhancer sequence-specific DNA binding transcription factor activity|	10	-0.2	0.339	0.931	3.12e-07	2.27e-07	0.9	35.3	0.00027	0.66	1.53	0.407 : 54194.5	0.52 : 54195.6	0.766 : 54198.9	0.781 : 54191.2	0.883 : 54199.10	0.914 : 54193.4	0.928 : 54192.3	0.944 : 54197.8	1.01 : 54196.7	1.16 : 54190.1	18032	1	0	NaN	NaN	1	0	0.310288	0	0	-0.689545	0	0
ENSMUSG00000032127	VPS11		VPS11	C	vacuolar protein sorting 11 homolog (S. cerevisiae)	lysosomal membrane|endosome|endocytic vesicle|HOPS complex|late endosome membrane|	intracellular protein transport|vesicle-mediated transport|	nucleotide binding|protein binding|zinc ion binding|	10	0.3	1.36	0.831	2.26e-05	2.66e-06	-2.39	35.5	0.00027	-3.66	-1.55	-2.59 : 33945.6	-2.23 : 33948.9	-1.64 : 33940.1	-1.55 : 33941.2	-0.97 : 33942.3	-0.799 : 33943.4	-0.668 : 33949.10	-0.549 : 33946.7	-0.503 : 33944.5	0.375 : 33947.8	71732	0	0	NaN	NaN	1	0	0.328953	0	0	-8.44499	1	0
ENSMUSG00000021264	YY1		YY1	C	YY1 transcription factor	nucleus|transcription factor complex|nuclear matrix|Ino80 complex|PcG protein complex|	negative regulation of transcription from RNA polymerase II promoter|double-strand break repair via homologous recombination|transcription, DNA-templated|regulation of transcription from RNA polymerase II promoter|RNA localization|cellular response to DNA damage stimulus|spermatogenesis|anterior/posterior pattern specification|response to UV-C|cell differentiation|cellular response to UV|response…	four-way junction DNA binding|RNA polymerase II core promoter proximal region sequence-specific DNA binding transcription factor activity involved in negative regulation of transcription|DNA binding|sequence-specific DNA binding transcription factor activity|transcription coactivator activity|transcription corepressor activity|RNA binding|protein binding|zinc ion binding|transcription regulatory …	10	-5	65.8	0.00086	3.49e-07	9.95e-07	-1.46	35.4	0.00027	-2.32	-0.89	-1.86 : 80844.3	-1.34 : 80849.8	-1.23 : 80847.6	-1.14 : 80845.4	-1.06 : 80851.10	-0.862 : 80846.5	-0.801 : 80850.9	-0.743 : 80848.7	-0.647 : 80843.2	-0.343 : 80842.1	22632	0	-1	1	NaN	NaN	NaN	0.367763	0	0	-8.31149	1	0
ENSMUSG00000032560	DNAJC13		DNAJC13	B	DnaJ (Hsp40) homolog, subfamily C, member 13	lysosomal membrane|membrane|extracellular vesicular exosome|	osteoblast differentiation|	None	10	0	0	0.942	1.32e-05	3.14e-06	-0.97	30.7	0.00028	-1.61	-0.67	-1.2 : 163761.1	-1.05 : 163769.9	-1.02 : 163765.5	-0.999 : 163770.10	-0.908 : 163767.7	-0.903 : 163763.3	-0.665 : 163762.2	-0.508 : 163768.8	-0.5 : 163766.6	0.148 : 163764.4	235567	0	0	NaN	NaN	1	0	0.395913	0	0	NaN	NaN	NaN
ENSMUSG00000027763	MBNL1		MBNL1	C	muscleblind-like splicing regulator 1	nucleus|cytoplasm|cytoplasmic stress granule|	alternative mRNA splicing, via spliceosome|regulation of alternative mRNA splicing, via spliceosome|in utero embryonic development|mRNA splice site selection|nervous system development|skeletal muscle tissue development|RNA splicing|embryonic limb morphogenesis|regulation of RNA splicing|myoblast differentiation|	RNA binding|double-stranded RNA binding|protein binding|poly(A) RNA binding|metal ion binding|	10	-1.5	53.8	0.00429	4.37e-07	1.77e-07	-2.13	34.9	0.00028	-3.18	-1.08	-2.38 : 187401.3	-1.94 : 187403.5	-1.3 : 187402.4	-1.07 : 187399.1	-1.05 : 187408.10	-0.89 : 187407.9	-0.595 : 187406.8	-0.497 : 187404.6	-0.485 : 187400.2	-0.442 : 187405.7	56758	0	0	NaN	NaN	1	0	0.382927	0	0	0.0776835	0	0
ENSMUSG00000038736	NUDCD1		NUDCD1	C	NudC domain containing 1	nucleus|cytoplasm|	immune system process|	None	10	-0.7	8.63	0.373	3.17e-06	1.97e-05	-2.03	34.9	0.00028	-3.11	-1.28	-2.27 : 201051.2	-1.86 : 201050.1	-1.55 : 201057.8	-1.27 : 201055.6	-1.08 : 201054.5	-0.883 : 201056.7	-0.77 : 201053.4	-0.712 : 201058.9	-0.151 : 201052.3	-0.151 : 201059.10	67429	0	0	NaN	NaN	1	0	0.546443	0	0	-1.17562	0	0
ENSMUSG00000045973	SLC25A51		SLC25A51	C	solute carrier family 25, member 51	mitochondrial inner membrane|integral component of membrane|	transport|	None	10	-0.8	22.9	0.112	2.77e-05	5.83e-05	-2.07	35	0.00028	-3.11	-1.23	-2.3 : 225812.8	-1.64 : 225805.1	-1.62 : 225810.6	-1.29 : 225806.2	-1.13 : 225814.10	-1.01 : 225807.3	-0.943 : 225808.4	-0.502 : 225809.5	-0.0156 : 225811.7	0.0346 : 225813.9	230125	0	0	NaN	NaN	1	0	0.41481	0	0	NaN	NaN	0
ENSMUSG00000039765	CC2D2A		CC2D2A	A	coiled-coil and C2 domain containing 2A	cytoplasm|cytoskeleton|ciliary transition zone|TCTN-B9D complex|	smoothened signaling pathway|cilium assembly|cilium morphogenesis|	None	10	-0.9	0.193	0.82	0.000274	0.0077	-4.48	40.4	0.0003	-7.94	-3.73	-4.61 : 92056.4	-4.12 : 92054.2	-1.69 : 92055.3	-1.16 : 92060.8	-0.684 : 92057.5	-0.398 : 92062.10	-0.225 : 92059.7	-0.199 : 92053.1	-0.0833 : 92058.6	0.0466 : 92061.9	231214	0	0	NaN	1	1	0	0.629167	0	0	-2.62266	0	0
ENSMUSG00000031701	DNAJA2		DNAJA2	A	DnaJ (Hsp40) homolog, subfamily A, member 2	cytosol|membrane|extracellular vesicular exosome|	positive regulation of cell proliferation|response to heat|protein refolding|	protein binding|ATP binding|heat shock protein binding|metal ion binding|unfolded protein binding|chaperone binding|	10	-1.6	39.5	0.0148	5.36e-05	2.07e-05	-2.09	41.4	0.0003	-3.2	-1.42	-2.39 : 5869.4	-2.03 : 5866.1	-1.72 : 5873.8	-1.56 : 5875.10	-1.5 : 5870.5	-0.954 : 5871.6	-0.863 : 5867.2	-0.714 : 5872.7	-0.265 : 5874.9	0.826 : 5868.3	56445	0	0	NaN	NaN	1	0	0.36652	0	0	-7.41518	1	0
ENSMUSG00000091405	HIST2H4		HIST1H4C	C	histone cluster 2, H4	nuclear chromosome|nucleus|membrane|protein complex|extracellular vesicular exosome|	DNA replication-dependent nucleosome assembly|DNA replication-independent nucleosome assembly|negative regulation of megakaryocyte differentiation|	protein binding|poly(A) RNA binding|	10	-4.2	45.5	0.011	0.0018	0.0159	-3.13	34.7	0.0003	-5.51	-1.81	-3.2 : 179417.4	-2.03 : 179418.5	-1.56 : 179419.6	-0.927 : 179421.8	-0.307 : 179414.1	-0.281 : 179416.3	-0.0919 : 179422.9	-0.0673 : 179420.7	-0.0656 : 179415.2	0.0562 : 179423.10	97122	0	0	NaN	NaN	1	0	0.177367	0	0	0.910856	0	0
ENSMUSG00000024241	SOS1		SOS1	A	son of sevenless homolog 1 (Drosophila)	cytosol|plasma membrane|postsynaptic density|neuronal cell body|	signal transduction|epidermal growth factor receptor signaling pathway|small GTPase mediated signal transduction|Ras protein signal transduction|axon guidance|blood coagulation|insulin receptor signaling pathway|fibroblast growth factor receptor signaling pathway|platelet activation|positive regulation of Ras GTPase activity|positive regulation of Ras GTPase activity|positive regulation of Rho GT…	DNA binding|Ras guanyl-nucleotide exchange factor activity|Ras guanyl-nucleotide exchange factor activity|Rho guanyl-nucleotide exchange factor activity|Rho GTPase activator activity|protein binding|SH3 domain binding|protein heterodimerization activity|	10	-2.9	68.3	0.00069	4.78e-06	1.45e-06	-1.96	41.4	0.0003	-2.99	-1.21	-2.28 : 94043.7	-1.75 : 94037.1	-1.62 : 94044.8	-1.4 : 94042.6	-1.05 : 94039.3	-0.998 : 94041.5	-0.908 : 94038.2	-0.628 : 94040.4	-0.618 : 94045.9	0.114 : 94046.10	20662	0	-1	NaN	NaN	NaN	NaN	0.488028	0	0	-1.84337	0	0
ENSMUSG00000024908	PPP6R3		PPP6R3	A	protein phosphatase 6, regulatory subunit 3	nucleus|cytoplasm|plasma membrane|	regulation of phosphoprotein phosphatase activity|	protein binding|protein phosphatase binding|	10	-0.2	0.0491	0.87	1.94e-07	5.37e-08	-1.49	39.7	0.00031	-2.35	-0.93	-1.87 : 121277.10	-1.53 : 121276.9	-1.38 : 121271.4	-1.09 : 121272.5	-1.09 : 121268.1	-0.989 : 121270.3	-0.882 : 121274.7	-0.763 : 121269.2	-0.699 : 121273.6	-0.581 : 121275.8	52036	0	0	NaN	NaN	1	0	0.414101	0	0	-0.0951518	0	0
ENSMUSG00000040782	RFWD2		RFWD2	C	ring finger and WD repeat domain 2, E3 ubiquitin protein ligase	Golgi membrane|nucleus|nucleoplasm|cytoplasm|centrosome|cytosol|focal adhesion|nuclear speck|	DNA damage response, signal transduction by p53 class mediator resulting in cell cycle arrest|protein ubiquitination|	protein binding|zinc ion binding|ligase activity|	10	0.4	4.42	0.586	4.14e-06	1.66e-06	-1.06	34.2	0.00031	-1.73	-0.8	-1.36 : 204288.10	-1.16 : 204279.1	-1.06 : 204281.3	-1.04 : 204283.5	-1.03 : 204287.9	-1.0 : 204286.8	-0.836 : 204284.6	-0.742 : 204285.7	-0.578 : 204282.4	0.0566 : 204280.2	26374	0	0	NaN	NaN	1	0	0.389226	0	0	-5.05463	0	0
ENSMUSG00000037343	TAF2		TAF2	A	TAF2 RNA polymerase II, TATA box binding protein (TBP)-associated factor, 150kDa	transcription factor TFIID complex|transcription factor TFIID complex|transcription factor TFTC complex|	G2/M transition of mitotic cell cycle|transcription initiation from RNA polymerase II promoter|proteolysis|response to organic cyclic compound|positive regulation of transcription from RNA polymerase II promoter|	protein binding|metallopeptidase activity|zinc ion binding|transcription regulatory region DNA binding|	9	-5.4	88.4	4e-05	0.000202	0.000213	-2.12	39.5	0.00032	-3.31	-1.34	-2.39 : 202371.2	-1.77 : 202375.6	-1.76 : 202377.8	-1.41 : 202373.4	-1.36 : 202378.9	-1.14 : 202372.3	-0.587 : 202376.7	-0.0249 : 202379.10	0.181 : 202370.1		319944	0	-1	NaN	NaN	NaN	NaN	0.56047	0	0	-1.85038	0	NaN
ENSMUSG00000021901	BAP1		BAP1	C	BRCA1 associated protein-1 (ubiquitin carboxy-terminal hydrolase)	nucleus|cytoplasm|PR-DUB complex|	regulation of cell growth|cellular protein modification process|ubiquitin-dependent protein catabolic process|negative regulation of cell proliferation|protein deubiquitination|monoubiquitinated protein deubiquitination|monoubiquitinated histone H2A deubiquitination|regulation of cell cycle|protein K48-linked deubiquitination|	chromatin binding|ubiquitin thiolesterase activity|ubiquitin thiolesterase activity|ubiquitin-specific protease activity|protein binding|peptidase activity|	8	-2.9	96.5	3e-05	2.4e-05	6.52e-05	-1.77	33.8	0.00034	-2.78	-1.39	-1.97 : 215395.1	-1.76 : 215400.6	-1.73 : 215399.5	-1.12 : 215404.10	-1.06 : 215397.3	-0.945 : 215401.7	-0.529 : 215403.9	-0.0523 : 215398.4			104416	0	-1	NaN	NaN	NaN	NaN	0.259593	0	0	-2.03126	0	0
ENSMUSG00000091400	GM6356			D	predicted gene 6356	None	None	None	10	-5.3	218	1e-05	0.257	0.0099	-3.03	29.6	0.00034	-5.14	-1.24	-3.2 : 164660.8	-1.92 : 164661.9	-1.08 : 164662.10	-0.987 : 164655.3	-0.987 : 164656.4	-0.633 : 164654.2	0.335 : 164659.7	0.929 : 164657.5	1.65 : 164653.1	1.99 : 164658.6	622781	5	-1	NaN	NaN	NaN	NaN	NaN	NaN	NaN	NaN	NaN	NaN
ENSMUSG00000051495	IRF2BP2		IRF2BP2	C	interferon regulatory factor 2 binding protein 2	nucleus|cytoplasm|	transcription, DNA-templated|regulation of transcription, DNA-templated|	metal ion binding|	10	0.5	7.11	0.434	2.99e-07	5.32e-08	-1.2	33.9	0.00034	-1.8	-0.85	-1.38 : 24054.3	-1.3 : 24060.9	-1.22 : 24053.2	-1.1 : 24052.1	-0.931 : 24056.5	-0.734 : 24055.4	-0.653 : 24061.10	-0.652 : 24059.8	-0.641 : 24057.6	-0.56 : 24058.7	270110	0	0	NaN	NaN	1	0	0.305583	0	0	NaN	NaN	0
ENSMUSG00000059309	HIST1H3F		HIST2H3A	C	histone cluster 1, H3f	nuclear chromosome|nucleosome|extracellular region|nucleus|nucleoplasm|membrane|protein complex|extracellular vesicular exosome|	chromatin organization|DNA replication-dependent nucleosome assembly|blood coagulation|regulation of gene silencing|	DNA binding|protein binding|protein heterodimerization activity|	10	-3.3	111	1e-05	0.000337	0.00015	-1.97	33.5	0.00035	-3.19	-1.53	-2.19 : 155215.5	-1.91 : 155213.3	-1.91 : 155216.6	-1.73 : 155217.7	-1.48 : 155212.2	-0.497 : 155218.8	-0.497 : 155214.4	-0.402 : 155220.10	0.0961 : 155211.1	0.266 : 155219.9	260423	3	-1	NaN	NaN	NaN	NaN	NaN	NaN	NaN	-0.511581	0	0
ENSMUSG00000017861	MYBL2		MYBL2	A	v-myb avian myeloblastosis viral oncogene homolog-like 2	nucleus|nucleoplasm|Myb complex|	G2/M transition of mitotic cell cycle|mitotic cell cycle|transcription, DNA-templated|positive regulation of transcription from RNA polymerase II promoter|regulation of cell cycle|spindle assembly involved in mitosis|	RNA polymerase II core promoter proximal region sequence-specific DNA binding|RNA polymerase II core promoter proximal region sequence-specific DNA binding transcription factor activity involved in positive regulation of transcription|chromatin binding|sequence-specific DNA binding transcription factor activity|protein binding|	10	-0.6	2.9	0.486	2.13e-05	0.000389	-2.86	38.6	0.00035	-4.65	-1.84	-3.07 : 122207.7	-2.3 : 122204.4	-2.19 : 122210.10	-1.62 : 122203.3	-0.735 : 122205.5	-0.593 : 122202.2	-0.472 : 122209.9	-0.361 : 122208.8	-0.153 : 122201.1	-0.0592 : 122206.6	17865	0	0	NaN	NaN	1	0	0.32735	0	0	-10.4271	1	0
ENSMUSG00000022100	XPO7		XPO7	C	exportin 7	nucleus|nuclear pore|cytoplasm|	protein export from nucleus|mRNA transport|	nuclear export signal receptor activity|Ran GTPase binding|	10	0.4	4.93	0.552	1.47e-06	1.67e-05	-1.23	33.4	0.00035	-2.04	-0.86	-1.51 : 158833.4	-1.3 : 158834.5	-1.21 : 158838.9	-1.06 : 158835.6	-1.05 : 158839.10	-1.04 : 158836.7	-0.855 : 158837.8	-0.78 : 158832.3	-0.34 : 158831.2	-0.144 : 158830.1	65246	0	0	NaN	NaN	1	0	0.443067	0	0	-4.24891	0	0
ENSMUSG00000051444	BBS12		BBS12	C	Bardet-Biedl syndrome 12	cilium|	cellular protein metabolic process|negative regulation of fat cell differentiation|chaperone-mediated protein complex assembly|	protein binding|ATP binding|	10	0.1	0.252	0.942	5.23e-05	2.52e-05	-1.51	33	0.00036	-2.44	-1.12	-1.8 : 170714.9	-1.53 : 170715.10	-1.47 : 170713.8	-1.43 : 170708.3	-1.13 : 170706.1	-0.791 : 170711.6	-0.753 : 170712.7	-0.659 : 170707.2	-0.108 : 170709.4	0.243 : 170710.5	241950	0	0	NaN	1	1	0	0.68911	0	1	-0.521546	0	0
ENSMUSG00000001924	UBA1		UBA1	A	ubiquitin-like modifier activating enzyme 1	heterochromatin|nucleus|cytoplasm|mitochondrion|lysosomal membrane|cytosol|endosome membrane|desmosome|rough endoplasmic reticulum membrane|extracellular vesicular exosome|	cellular response to DNA damage stimulus|cell death|protein ubiquitination|protein ubiquitination|modification-dependent protein catabolic process|	ubiquitin activating enzyme activity|ubiquitin-protein transferase activity|protein binding|ATP binding|poly(A) RNA binding|	9	-4.5	119	1e-05	0.00112	0.000166	-3.25	38.2	0.00037	-5.12	-0.78	-3.44 : 79531.2	-1.23 : 79533.4	-1.16 : 79538.9	-1.15 : 79537.8	-0.908 : 79530.1	-0.788 : 79534.5	-0.63 : 79532.3	0.098 : 79536.7	0.491 : 79535.6		22201	0	-1	1	NaN	NaN	NaN	0.324063	0	0	-11.9739	1	0
ENSMUSG00000048799	CEP120		CEP120	B	centrosomal protein 120kDa	cytoplasm|centrosome|	cerebral cortex development|neurogenesis|interkinetic nuclear migration|astral microtubule organization|regulation of protein localization|regulation of microtubule-based process|	protein C-terminus binding|	10	-1.2	36.2	0.0241	2.88e-05	0.000398	-2.51	29.9	0.00039	-4.05	-1.87	-2.6 : 51904.8	-2.58 : 51903.7	-1.8 : 51897.1	-1.46 : 51899.3	-0.746 : 51901.5	-0.645 : 51906.10	-0.644 : 51898.2	-0.283 : 51905.9	-0.175 : 51902.6	0.0538 : 51900.4	225523	0	0	NaN	1	1	0	0.765947	1	0	-10.5776	1	0
ENSMUSG00000038215	CEP44		CEP44	A	centrosomal protein 44kDa	spindle pole|cytoplasm|centrosome|midbody|	None	None	10	-0.1	0.0488	0.87	9.54e-06	4.36e-05	-2.9	37.3	0.00039	-5.07	-2.3	-3.1 : 140805.1	-2.92 : 140807.3	-2.16 : 140806.2	-0.902 : 140809.5	-0.66 : 140808.4	-0.602 : 140811.7	-0.384 : 140810.6	-0.334 : 140814.10	-0.225 : 140812.8	-0.207 : 140813.9	382010	0	0	NaN	NaN	1	0	0.740383	1	0	NaN	NaN	0
ENSMUSG00000034021	PDS5B		PDS5B	B	PDS5, regulator of cohesion maintenance, homolog B (S. cerevisiae)	chromosome, centromeric region|chromatin|nucleus|nucleus|nucleoplasm|chromosome|cytosol|	mitotic cell cycle|mitotic sister chromatid cohesion|cell proliferation|negative regulation of cell proliferation|regulation of cell proliferation|	DNA binding|protein binding|ATP binding|	10	-0.1	0.104	0.921	0.0001	4.7e-05	-2.07	29.8	0.00039	-3.45	-1.33	-2.31 : 197142.1	-2.07 : 197147.6	-1.16 : 197148.7	-1.05 : 197151.10	-0.897 : 197145.4	-0.832 : 197149.8	-0.651 : 197144.3	-0.306 : 197150.9	-0.302 : 197143.2	0.707 : 197146.5	100710	0	0	NaN	NaN	1	0	0.742413	1	0	-4.5404	0	0
ENSMUSG00000004591	PKN2		PKN2	B	protein kinase N2	nucleus|cytoplasm|centrosome|membrane|lamellipodium|midbody|cleavage furrow|apical junction complex|intermediate filament cytoskeleton|	transcription, DNA-templated|regulation of transcription, DNA-templated|protein phosphorylation|apoptotic process|cell cycle|cell adhesion|signal transduction|epithelial cell migration|positive regulation of cytokinesis|apical junction assembly|positive regulation of mitotic cell cycle|cell division|regulation of cell motility|	protein kinase activity|protein serine/threonine kinase activity|protein kinase C activity|protein binding|ATP binding|histone deacetylase binding|poly(A) RNA binding|	10	-1.4	22.8	0.113	0.0229	0.022	-2.01	29.9	0.00039	-3.42	-1.58	-2.15 : 45225.1	-2.05 : 45233.9	-1.94 : 45229.5	-1.69 : 45231.7	-0.876 : 45234.10	-0.292 : 45232.8	-0.0386 : 45227.3	-0.0352 : 45230.6	0.3 : 45226.2	0.577 : 45228.4	109333	0	0	NaN	NaN	1	0	0.337547	0	0	-2.93743	0	0
ENSMUSG00000022568	SCRIB		SCRIB	B	scribbled planar cell polarity protein	plasma membrane|plasma membrane|cell-cell junction|cell-cell adherens junction|basolateral plasma membrane|lamellipodium|cell leading edge|Scrib-APC-beta-catenin complex|myelin sheath abaxonal region|presynaptic membrane|postsynaptic membrane|extracellular vesicular exosome|	neural tube closure|positive regulation of receptor recycling|asymmetric protein localization|cell proliferation|viral process|synaptic vesicle targeting|single organismal cell-cell adhesion|cell migration|activation of Rac GTPase activity|establishment of apical/basal cell polarity|wound healing|positive regulation of apoptotic process|astrocyte cell migration|negative regulation of mitotic cell…	protein binding|	10	-2	40	0.0191	1.36e-06	3.17e-06	-1.19	29.6	0.00039	-2.26	-0.84	-1.76 : 165417.5	-1.25 : 165414.2	-1.19 : 165419.7	-1.14 : 165421.9	-0.941 : 165415.3	-0.739 : 165416.4	-0.627 : 165422.10	-0.547 : 165413.1	-0.5 : 165418.6	-0.169 : 165420.8	105782	0	0	NaN	NaN	1	0	0.267607	0	0	0.169975	0	0
ENSMUSG00000020525	PPM1D		PPM1D	B	protein phosphatase, Mg2+/Mn2+ dependent, 1D	nucleus|	G2/M transition of mitotic cell cycle|protein dephosphorylation|negative regulation of cell proliferation|response to radiation|response to bacterium|peptidyl-threonine dephosphorylation|	protein serine/threonine phosphatase activity|protein binding|metal ion binding|	10	-2.1	66.6	0.0011	0.000316	3.23e-05	-1.79	29.3	0.00041	-2.91	-1.15	-2.01 : 4744.1	-1.81 : 4746.3	-1.38 : 4753.10	-1.1 : 4749.6	-0.858 : 4748.5	-0.655 : 4750.7	-0.637 : 4745.2	-0.593 : 4747.4	0.0147 : 4752.9	0.753 : 4751.8	53892	0	0	NaN	NaN	1	0	0.49645	0	0	-0.910645	0	0
ENSMUSG00000026750	PSMB7		PSMB7	B	proteasome (prosome, macropain) subunit, beta type, 7	proteasome complex|nucleus|nucleoplasm|cytosol|proteasome core complex|microtubule cytoskeleton|extracellular vesicular exosome|	G1/S transition of mitotic cell cycle|protein polyubiquitination|mitotic cell cycle|antigen processing and presentation of peptide antigen via MHC class I|antigen processing and presentation of exogenous peptide antigen via MHC class I, TAP-dependent|regulation of cellular amino acid metabolic process|apoptotic process|DNA damage response, signal transduction by p53 class mediator resulting in ce…	threonine-type endopeptidase activity|protein binding|	8	-6.4	204	1e-05	0.00054	0.000166	-1.83	29.3	0.00041	-3.22	-1.37	-2.04 : 556.2	-1.81 : 563.9	-1.75 : 555.1	-1.38 : 562.8	-0.691 : 564.10	-0.56 : 560.6	-0.416 : 561.7	0.51 : 558.4			19177	0	-1	NaN	NaN	NaN	NaN	0.214792	0	0	-12.5423	1	0
ENSMUSG00000039523	CEP104		CEP104	C	centrosomal protein 104kDa	centriole|	None	glycine binding|glutamate binding|thienylcyclohexylpiperidine binding|	10	-0.2	1.17	0.848	1.37e-06	2.01e-05	-1.81	32.7	0.00042	-2.91	-1.1	-2.12 : 179833.10	-1.81 : 179828.5	-1.33 : 179831.8	-1.18 : 179824.1	-0.944 : 179826.3	-0.861 : 179825.2	-0.778 : 179832.9	-0.71 : 179829.6	-0.332 : 179827.4	-0.168 : 179830.7	230967	0	0	NaN	1	1	0	0.593556	0	0	-4.34	0	0
ENSMUSG00000025008	TCTN3		TCTN3	A	tectonic family member 3	integral component of membrane|extracellular vesicular exosome|	apoptotic process|smoothened signaling pathway|cilium morphogenesis|	None	10	-0.9	14	0.184	0.000175	0.000676	-2.88	37	0.00042	-4.79	-1.29	-3.09 : 140914.10	-1.77 : 140913.9	-1.5 : 140905.1	-1.36 : 140907.3	-1.25 : 140912.8	-0.56 : 140909.5	-0.369 : 140908.4	-0.326 : 140910.6	-0.132 : 140906.2	0.307 : 140911.7	67590	0	0	NaN	1	1	0	0.416585	0	0	-2.39256	0	0
ENSMUSG00000059834	SCLT1		SCLT1	A	sodium channel and clathrin linker 1	cytoplasm|centrosome|centriole|microtubule cytoskeleton|extracellular vesicular exosome|clathrin complex|ciliary transition fiber|	cilium assembly|clustering of voltage-gated sodium channels|	protein C-terminus binding|sodium channel regulator activity|clathrin binding|	10	0	0	0.889	1.23e-05	2.6e-05	-4.09	36.8	0.00043	-6.79	-2.63	-4.25 : 107802.8	-2.92 : 107801.7	-1.79 : 107803.9	-1.78 : 107799.5	-0.731 : 107795.1	-0.618 : 107800.6	-0.454 : 107798.4	-0.447 : 107797.3	-0.357 : 107804.10	0.0357 : 107796.2	67161	0	0	NaN	1	1	0	0.606224	0	0	-2.96427	0	0
ENSMUSG00000020994	PNN		PNN	B	pinin, desmosome associated protein	nucleus|cytoplasm|intermediate filament|plasma membrane|cell-cell junction|membrane|nuclear speck|desmosome|exon-exon junction complex|catalytic step 2 spliceosome|	mRNA splicing, via spliceosome|transcription, DNA-templated|regulation of transcription, DNA-templated|cell adhesion|	DNA binding|structural molecule activity|poly(A) RNA binding|	10	-3.6	79.2	0.00029	0.000102	0.000647	-2.67	29	0.00045	-4.23	-1.86	-2.83 : 27716.9	-2.33 : 27713.6	-1.97 : 27711.4	-1.22 : 27709.2	-1.07 : 27715.8	-0.812 : 27708.1	-0.24 : 27712.5	-0.225 : 27710.3	-0.189 : 27717.10	0.122 : 27714.7	18949	0	-1	NaN	NaN	NaN	NaN	0.32091	0	0	-10.2825	1	0
ENSMUSG00000005687	BCAS2		BCAS2	A	breast carcinoma amplified sequence 2	nucleus|spliceosomal complex|nucleolus|cell junction|	RNA splicing, via transesterification reactions|mRNA processing|RNA splicing|	protein binding|	9	-4.1	80.1	0.00019	0.0451	0.00578	-3.08	35.5	0.00048	-5.72	-1.18	-3.25 : 155270.10	-1.4 : 155267.7	-1.3 : 155266.6	-1.14 : 155269.9	-0.63 : 155262.2	-0.469 : 155263.3	0.0959 : 155268.8	0.937 : 155264.4	1.58 : 155261.1		68183	0	-1	NaN	NaN	NaN	NaN	0.397647	0	0	0.225728	0	0
ENSMUSG00000040220	GAS8		GAS8	C	growth arrest-specific 8	Golgi apparatus|microtubule|motile cilium|	negative regulation of cell proliferation|sperm motility|cellular protein localization|	molecular_function|Rab GTPase binding|	10	-1.9	5.01	0.547	1.37e-05	0.000121	-1.94	32.2	0.00048	-2.98	-1.19	-2.2 : 119200.9	-1.65 : 119198.7	-1.61 : 119197.6	-1.27 : 119193.2	-1.07 : 119196.5	-1.04 : 119194.3	-0.777 : 119201.10	-0.412 : 119192.1	-0.258 : 119195.4	0.0962 : 119199.8	104346	0	0	NaN	NaN	1	0	0.770749	1	0	0.618231	0	0
ENSMUSG00000078789	DPH1		DPH1	A	diphthamide biosynthesis 1	nucleus|cytoplasm|	translation|cell proliferation|peptidyl-diphthamide biosynthetic process from peptidyl-histidine|	None	10	-1.1	15.4	0.177	4.03e-05	4.55e-05	-2.25	35.4	0.00049	-3.42	-1.26	-2.53 : 207041.10	-1.84 : 207036.5	-1.67 : 207038.7	-1.43 : 207033.2	-1.24 : 207037.6	-1.01 : 207040.9	-0.711 : 207039.8	-0.561 : 207035.4	-0.18 : 207032.1	0.281 : 207034.3	116905	0	0	NaN	NaN	1	0	0.392397	0	0	-4.16236	1	0
ENSMUSG00000021819	ZSWIM8		ZSWIM8	A	zinc finger, SWIM-type containing 8	None	None	zinc ion binding|	10	-1.3	20	0.158	1.67e-05	3.17e-05	-1.91	35.3	0.00049	-3.04	-1.42	-2.12 : 142864.3	-2.05 : 142866.5	-1.83 : 142862.1	-1.53 : 142868.7	-1.14 : 142870.9	-0.931 : 142869.8	-0.72 : 142871.10	-0.625 : 142863.2	-0.156 : 142867.6	0.0841 : 142865.4	268721	0	0	NaN	NaN	1	0	0.271733	0	0	NaN	NaN	NaN
ENSMUSG00000032407	U2SURP		U2SURP	B	U2 snRNP-associated SURP domain containing	nucleus|	RNA processing|	nucleotide binding|protein binding|poly(A) RNA binding|	10	-1.1	11.2	0.258	0.000667	0.0016	-2.35	28.5	0.0005	-3.99	-1.68	-2.52 : 64799.10	-2.15 : 64797.8	-1.9 : 64798.9	-1.43 : 64790.1	-1.34 : 64791.2	-0.3 : 64792.3	-0.285 : 64796.7	-0.259 : 64794.5	0.0477 : 64793.4	0.188 : 64795.6	67958	0	0	NaN	NaN	1	0	0.561747	0	0	NaN	NaN	0
ENSMUSG00000005575	UBE2M		UBE2M	A	ubiquitin-conjugating enzyme E2M	cytosol|extracellular vesicular exosome|	cellular protein modification process|cellular protein modification process|transforming growth factor beta receptor signaling pathway|protein ubiquitination|protein ubiquitination|positive regulation of neuron apoptotic process|protein neddylation|protein neddylation|	ubiquitin-protein transferase activity|ubiquitin-protein transferase activity|protein binding|ATP binding|ribosomal S6-glutamic acid ligase activity|NEDD8 ligase activity|	10	2.3	59.2	0.00139	3.63e-05	0.000281	-2.49	35.1	0.0005	-3.99	-2	-2.74 : 183852.8	-2.52 : 183847.3	-2.41 : 183851.7	-2.03 : 183845.1	-1.34 : 183854.10	-1.06 : 183850.6	-0.491 : 183846.2	-0.338 : 183848.4	-0.247 : 183849.5	0.189 : 183853.9	22192	0	0	NaN	NaN	1	0	0.229753	0	0	-3.55784	0	0
ENSMUSG00000021686	AP3B1		AP3B1	C	adaptor-related protein complex 3, beta 1 subunit	lysosomal membrane|Golgi apparatus|membrane|AP-3 adaptor complex|clathrin-coated vesicle membrane|	protein targeting to lysosome|intracellular protein transport|blood coagulation|anterograde axon cargo transport|melanosome organization|antigen processing and presentation, exogenous lipid antigen via MHC class Ib|anterograde synaptic vesicle transport|positive regulation of NK T cell differentiation|	protein phosphatase binding|GTP-dependent protein binding|	10	0.9	8.14	0.392	6.08e-07	1.16e-06	-1.46	31.9	0.00051	-2.26	-0.91	-1.63 : 95497.8	-1.57 : 95491.2	-1.21 : 95493.4	-1.11 : 95499.10	-0.986 : 95498.9	-0.883 : 95496.7	-0.69 : 95490.1	-0.556 : 95495.6	-0.431 : 95492.3	-0.336 : 95494.5	11774	0	0	NaN	NaN	1	0	0.323533	0	0	-4.79111	0	0
ENSMUSG00000079509	ZFX		ZFX	C	zinc finger protein, X-linked	nucleus|	ovarian follicle development|transcription, DNA-templated|regulation of transcription, DNA-templated|spermatogenesis|fertilization|embryo development|post-embryonic development|death|multicellular organism growth|oocyte development|homeostasis of number of cells|parental behavior|	DNA binding|transcription coactivator activity|metal ion binding|	10	0.6	2.37	0.744	1.6e-06	2.74e-06	-1.88	31.7	0.00051	-3.02	-1.23	-2.19 : 91046.4	-1.82 : 91052.10	-1.57 : 91051.9	-1.05 : 91044.2	-0.987 : 91048.6	-0.708 : 91050.8	-0.633 : 91045.3	-0.604 : 91047.5	-0.497 : 91043.1	-0.116 : 91049.7	22764	0	0	NaN	NaN	1	0	0.464983	0	0	-2.65946	0	0
ENSMUSG00000033161	ATP1A1		ATP1A1	B	ATPase, Na+/K+ transporting, alpha 1 polypeptide	endosome|endoplasmic reticulum|Golgi apparatus|plasma membrane|plasma membrane|sodium:potassium-exchanging ATPase complex|caveola|membrane|integral component of membrane|basolateral plasma membrane|T-tubule|melanosome|protein complex|extracellular vesicular exosome|	regulation of the force of heart contraction|regulation of sodium ion transport|ATP biosynthetic process|regulation of blood pressure|potassium ion import|negative regulation of glucocorticoid biosynthetic process|ion transmembrane transport|sodium ion transmembrane transport|sodium ion transmembrane transport|sodium ion transmembrane transport|response to drug|negative regulation of heart contra…	sodium:potassium-exchanging ATPase activity|protein binding|ATP binding|protein kinase binding|protein domain specific binding|ankyrin binding|potassium ion binding|sodium ion binding|ADP binding|phosphatidylinositol 3-kinase binding|chaperone binding|	9	-4.6	82.6	0.00019	6.99e-05	0.000218	-2.62	28.4	0.00056	-4.24	-1.59	-2.78 : 107008.9	-2.21 : 107006.7	-1.28 : 107009.10	-1.17 : 107003.4	-1.03 : 107001.2	-0.842 : 107005.6	-0.556 : 107004.5	-0.237 : 107000.1	0.14 : 107007.8		11928	0	-1	NaN	NaN	NaN	NaN	0.302907	0	0	-8.35937	1	0
ENSMUSG00000000378	CCM2		CCM2	A	cerebral cavernous malformation 2	cytoplasm|protein complex|	vasculogenesis|in utero embryonic development|endothelial cell development|integrin-mediated signaling pathway|multicellular organism growth|cell-cell junction organization|inner ear development|venous blood vessel morphogenesis|stress-activated MAPK cascade|pericardium development|blood vessel endothelial cell differentiation|endothelial tube morphogenesis|	protein binding|	10	0.3	1.52	0.615	3.95e-06	3.64e-05	-1.22	34.2	0.00057	-1.84	-0.96	-1.4 : 88988.5	-1.35 : 88989.6	-1.35 : 88992.9	-1.29 : 88987.4	-1.24 : 88993.10	-1.19 : 88991.8	-0.667 : 88984.1	-0.602 : 88985.2	-0.232 : 88986.3	-0.113 : 88990.7	216527	0	0	NaN	NaN	1	0	0.328137	0	0	-3.10269	0	1
ENSMUSG00000022193	PSMB5		PSMB5	A	proteasome (prosome, macropain) subunit, beta type, 5	proteasome complex|nucleus|nucleoplasm|cytosol|proteasome core complex|extracellular vesicular exosome|	G1/S transition of mitotic cell cycle|protein polyubiquitination|mitotic cell cycle|antigen processing and presentation of peptide antigen via MHC class I|antigen processing and presentation of exogenous peptide antigen via MHC class I, TAP-dependent|regulation of cellular amino acid metabolic process|apoptotic process|DNA damage response, signal transduction by p53 class mediator resulting in ce…	threonine-type endopeptidase activity|protein binding|	10	-4	89.5	3e-05	0.0014	0.00537	-2.34	34.2	0.00057	-3.99	-1.82	-2.57 : 8090.5	-2.38 : 8087.2	-2.17 : 8094.9	-1.67 : 8095.10	-1.6 : 8088.3	-0.626 : 8086.1	-0.151 : 8091.6	-0.124 : 8092.7	0.0415 : 8093.8	0.252 : 8089.4	19173	0	-1	NaN	NaN	NaN	NaN	0.24464	0	0	-6.15199	0	0
ENSMUSG00000030680	PAGR1A		PAGR1	A	PAXIP1 associated glutamate rich protein 1A	nucleus|histone methyltransferase complex|histone methyltransferase complex|	histone H3-K27 demethylation|	protein binding|	10	0.7	9.32	0.233	1.91e-06	1.79e-05	-1.38	34.1	0.00058	-2.3	-0.94	-1.73 : 83638.5	-1.44 : 83643.10	-1.39 : 83637.4	-1.22 : 83639.6	-1.1 : 83636.3	-1.01 : 83640.7	-0.646 : 83641.8	-0.424 : 83642.9	-0.376 : 83634.1	-0.191 : 83635.2	67278	4	0	NaN	NaN	1	0	0.36257	0	0	NaN	NaN	0
ENSMUSG00000090547	GM8265			D	predicted gene 8265	cellular_component|	biological_process|	molecular_function|	10	-4.6	115	1e-05	0.0438	0.0905	-3.06	27.3	0.00059	-5.42	-1.4	-3.2 : 109592.5	-1.92 : 109593.6	-1.25 : 109591.4	-1.08 : 109595.8	-0.373 : 109589.2	-0.335 : 109594.7	-0.137 : 109590.3	0.118 : 109597.10	0.335 : 109588.1	0.595 : 109596.9	100856803	9	-1	NaN	NaN	NaN	NaN	NaN	NaN	NaN	NaN	NaN	NaN
ENSMUSG00000024169	IFT140		IFT140	A	intraflagellar transport 140	centrosome|axoneme|intraciliary transport particle A|photoreceptor connecting cilium|ciliary basal body|	cilium assembly|skeletal system morphogenesis|retina development in camera-type eye|protein localization to cilium|renal system development|regulation of cilium assembly|	molecular_function|	10	-0.9	11.2	0.207	1e-05	1.95e-06	-3.88	33.7	0.00059	-5.74	-1.84	-4.08 : 135807.10	-2.5 : 135799.2	-2.02 : 135800.3	-1.24 : 135798.1	-1.13 : 135803.6	-1.09 : 135806.9	-0.958 : 135802.5	-0.901 : 135801.4	-0.567 : 135805.8	0.291 : 135804.7	106633	0	0	NaN	1	1	0	0.838833	1	0	-3.42267	0	0
ENSMUSG00000020719	DDX5		DDX5	C	DEAD (Asp-Glu-Ala-Asp) box helicase 5	nucleus|nucleus|nucleolus|membrane|ribonucleoprotein complex|extracellular vesicular exosome|catalytic step 2 spliceosome|	negative regulation of transcription from RNA polymerase II promoter|regulation of alternative mRNA splicing, via spliceosome|mRNA splicing, via spliceosome|in utero embryonic development|ATP catabolic process|transcription, DNA-templated|circadian rhythm|cell growth|positive regulation of intracellular estrogen receptor signaling pathway|positive regulation of DNA damage response, signal transdu…	transcription coactivator activity|RNA helicase activity|RNA helicase activity|ATP-dependent RNA helicase activity|protein binding|calmodulin binding|ATP binding|enzyme binding|estrogen receptor binding|pre-mRNA binding|poly(A) RNA binding|calcium-dependent protein binding|androgen receptor binding|	10	-1.1	22.9	0.112	2.98e-06	5.23e-05	-1.45	31.3	0.00061	-2.29	-0.97	-1.67 : 118037.9	-1.51 : 118035.7	-1.23 : 118034.6	-1.22 : 118030.2	-1.06 : 118029.1	-1.01 : 118032.4	-0.727 : 118036.8	-0.52 : 118038.10	-0.232 : 118033.5	-0.128 : 118031.3	13207	0	0	NaN	NaN	1	0	NaN	NaN	NaN	-2.57623	0	0
ENSMUSG00000041734	KIRREL		KIRREL	B	kin of IRRE like (Drosophila)	plasma membrane|plasma membrane|cell-cell junction|integral component of membrane|dendritic shaft|perinuclear region of cytoplasm|extracellular vesicular exosome|	negative regulation of protein phosphorylation|excretion|single organismal cell-cell adhesion|positive regulation of actin filament polymerization|	protein binding|myosin binding|	10	0.8	16.2	0.204	6.8e-06	0.000202	-2.02	28.2	0.00061	-3.16	-1.34	-2.25 : 187347.9	-1.68 : 187348.10	-1.64 : 187343.5	-1.58 : 187346.8	-1.36 : 187340.2	-0.626 : 187344.6	-0.393 : 187342.4	-0.358 : 187341.3	-0.241 : 187339.1	-0.126 : 187345.7	170643	0	0	NaN	NaN	1	0	0.382743	0	0	0.713165	0	0
ENSMUSG00000042275	PELO		PELO	A	pelota homolog (Drosophila)	nucleus|cytoplasm|	cell cycle|cell proliferation|chromosome organization|cell division|nuclear-transcribed mRNA catabolic process, non-stop decay|nuclear-transcribed mRNA catabolic process, no-go decay|RNA surveillance|nucleic acid phosphodiester bond hydrolysis|	endonuclease activity|metal ion binding|	10	-2.6	73.3	0.00048	0.00105	0.000264	-2.45	33.2	0.00062	-3.93	-1.77	-2.71 : 183649.5	-2.47 : 183646.2	-1.95 : 183650.6	-1.57 : 183654.10	-1.26 : 183651.7	-0.935 : 183648.4	-0.821 : 183652.8	-0.384 : 183647.3	0.391 : 183645.1	0.51 : 183653.9	105083	0	-1	NaN	NaN	NaN	NaN	0.31156	0	0	-1.41844	0	0
ENSMUSG00000040661	RAD54L2		RAD54L2	C	RAD54-like 2 (S. cerevisiae)	nucleus|	metabolic process|regulation of RNA biosynthetic process|	DNA binding|transcription cofactor activity|helicase activity|ATP binding|protein kinase binding|	10	-1.1	4.42	0.586	4.07e-07	2.7e-07	-1.33	31.1	0.00065	-2.81	-0.76	-2.28 : 209186.5	-1.41 : 209188.7	-1.05 : 209189.8	-1.01 : 209182.1	-0.922 : 209183.2	-0.85 : 209187.6	-0.825 : 209190.9	-0.792 : 209185.4	-0.411 : 209191.10	-0.403 : 209184.3	81000	0	0	NaN	NaN	1	0	0.53005	0	0	-5.79099	0	0
ENSMUSG00000057594	ARL16		ARL16	A	ADP-ribosylation factor-like 16	intracellular|	small GTPase mediated signal transduction|	GTP binding|	10	-2.8	3.6	0.426	5.19e-06	8.12e-07	-1.04	33	0.00066	-1.68	-0.73	-1.26 : 127213.8	-1.21 : 127207.2	-1.18 : 127215.10	-1.11 : 127212.7	-0.932 : 127211.6	-0.867 : 127214.9	-0.821 : 127209.4	-0.801 : 127206.1	-0.728 : 127210.5	0.116 : 127208.3	70317	0	0	NaN	NaN	1	0	0.316327	0	0	-1.14671	0	0
ENSMUSG00000073542	CEP76		CEP76	A	centrosomal protein 76kDa	centrosome|centriole|cytosol|protein complex|	G2/M transition of mitotic cell cycle|mitotic cell cycle|regulation of centriole replication|	protein binding|	10	0	0	0.889	0.000846	0.000779	-2.26	32.7	0.00068	-3.53	-1.26	-2.53 : 123000.4	-1.84 : 123003.7	-1.63 : 122997.1	-1.43 : 122999.3	-1.27 : 122998.2	-1.14 : 123001.5	-0.542 : 123002.6	-0.314 : 123004.8	0.203 : 123005.9	0.542 : 123006.10	225659	0	0	NaN	NaN	1	0	0.749907	1	0	-4.25612	0	0
ENSMUSG00000037325	BBS7		BBS7	A	Bardet-Biedl syndrome 7	cytoplasm|centrosome|BBSome|ciliary membrane|	eye development|heart looping|regulation of transcription from RNA polymerase II promoter|smoothened signaling pathway|determination of left/right symmetry|brain development|visual perception|protein transport|melanosome transport|positive regulation of proteasomal ubiquitin-dependent protein catabolic process|nonmotile primary cilium assembly|fat cell differentiation|digestive tract morphogenesi…	RNA polymerase II repressing transcription factor binding|protein binding|	10	-0.1	0.0805	0.857	4.69e-06	0.000177	-2.48	32.6	0.0007	-3.9	-1.79	-2.74 : 25095.10	-2.38 : 25088.3	-2.1 : 25089.4	-1.15 : 25087.2	-1.13 : 25094.9	-1.03 : 25093.8	-0.966 : 25090.5	-0.353 : 25092.7	-0.194 : 25086.1	-0.162 : 25091.6	71492	0	0	NaN	1	1	0	0.731039	1	0	-1.09506	0	0
ENSMUSG00000026926	PMPCA		PMPCA	C	peptidase (mitochondrial processing) alpha	extracellular space|mitochondrion|mitochondrial inner membrane|mitochondrial matrix|	proteolysis|protein targeting to mitochondrion|cellular protein metabolic process|	metalloendopeptidase activity|metal ion binding|	10	-2.3	39.1	0.0201	0.000134	3.47e-05	-1.92	30.7	0.0007	-3.08	-1.47	-2.02 : 43325.3	-1.97 : 43324.2	-1.94 : 43327.5	-0.913 : 43330.8	-0.865 : 43331.9	-0.738 : 43323.1	-0.62 : 43332.10	-0.594 : 43326.4	-0.117 : 43329.7	0.649 : 43328.6	66865	0	0	NaN	NaN	1	0	0.185635	0	0	-10.3577	1	0
ENSMUSG00000031935	MED17		MED17	C	mediator complex subunit 17	nucleus|nucleoplasm|transcription factor complex|membrane|mediator complex|	regulation of transcription from RNA polymerase II promoter|transcription initiation from RNA polymerase II promoter|transcription initiation from RNA polymerase II promoter|gene expression|stem cell maintenance|intracellular steroid hormone receptor signaling pathway|androgen receptor signaling pathway|positive regulation of transcription, DNA-templated|positive regulation of transcription from …	RNA polymerase II transcription cofactor activity|transcription cofactor activity|transcription coactivator activity|receptor activity|ligand-dependent nuclear receptor transcription coactivator activity|vitamin D receptor binding|thyroid hormone receptor binding|	10	-4.8	68.3	0.00062	0.00422	0.00051	-2.37	30.6	0.00072	-3.79	-1.55	-2.54 : 171495.10	-2.04 : 171489.4	-1.84 : 171490.5	-1.3 : 171492.7	-1.08 : 171488.3	-0.66 : 171494.9	-0.609 : 171487.2	-0.0588 : 171486.1	0.336 : 171491.6	0.914 : 171493.8	234959	0	-1	NaN	NaN	NaN	NaN	0.662623	0	1	-8.2707	0	0
ENSMUSG00000000532	ACVR1B		ACVR1B	B	activin A receptor, type IB	plasma membrane|integral component of plasma membrane|cell surface|extracellular vesicular exosome|	G1/S transition of mitotic cell cycle|in utero embryonic development|hair follicle development|regulation of transcription, DNA-templated|protein phosphorylation|signal transduction|transmembrane receptor protein serine/threonine kinase signaling pathway|central nervous system development|positive regulation of pathway-restricted SMAD protein phosphorylation|peptidyl-threonine phosphorylation|sig…	protein serine/threonine kinase activity|protein serine/threonine kinase activity|transmembrane receptor protein serine/threonine kinase activity|receptor signaling protein serine/threonine kinase activity|transforming growth factor beta-activated receptor activity|protein binding|ATP binding|activin receptor activity, type I|activin receptor activity, type I|activin-activated receptor activity|g…	10	-1.3	3.33	0.559	1.27e-06	5.52e-06	-1.31	27.8	0.00073	-1.91	-0.96	-1.48 : 220907.4	-1.46 : 220904.1	-1.29 : 220905.2	-1.18 : 220910.7	-0.772 : 220906.3	-0.75 : 220912.9	-0.591 : 220908.5	-0.572 : 220911.8	-0.444 : 220909.6	-0.207 : 220913.10	11479	0	0	NaN	NaN	1	0	0.21989	0	0	-3.54281	0	0
ENSMUSG00000007564	PPP2R1A		PPP2R1A	B	protein phosphatase 2, regulatory subunit A, alpha	protein phosphatase type 2A complex|protein phosphatase type 2A complex|chromosome, centromeric region|nucleus|mitochondrion|cytosol|microtubule cytoskeleton|membrane|	G2/M transition of mitotic cell cycle|nuclear-transcribed mRNA catabolic process, nonsense-mediated decay|inactivation of MAPK activity|mitotic cell cycle|regulation of DNA replication|regulation of transcription, DNA-templated|protein complex assembly|protein dephosphorylation|ceramide metabolic process|apoptotic process|chromosome segregation|mitotic nuclear envelope reassembly|RNA splicing|fib…	antigen binding|protein serine/threonine phosphatase activity|protein binding|protein phosphatase type 2A regulator activity|protein heterodimerization activity|	10	-2.7	60.9	0.00196	0.00643	0.00376	-2.34	27.8	0.00073	-3.63	-1.89	-2.49 : 31664.3	-2.35 : 31665.4	-2.17 : 31670.9	-1.02 : 31663.2	-0.803 : 31667.6	-0.699 : 31666.5	-0.352 : 31669.8	-0.119 : 31662.1	0.495 : 31668.7	1.21 : 31671.10	51792	0	-1	1	NaN	NaN	NaN	0.284843	0	0	-6.1337	0	0
ENSMUSG00000016921	SRSF6		SRSF6	C	serine/arginine-rich splicing factor 6	nucleus|nucleoplasm|nuclear speck|	alternative mRNA splicing, via spliceosome|regulation of alternative mRNA splicing, via spliceosome|regulation of alternative mRNA splicing, via spliceosome|mRNA splicing, via spliceosome|transcription from RNA polymerase II promoter|termination of RNA polymerase II transcription|mRNA splice site selection|mRNA export from nucleus|RNA splicing|gene expression|regulation of keratinocyte proliferat…	nucleotide binding|RNA binding|pre-mRNA binding|poly(A) RNA binding|	10	0.3	1.12	0.853	1.19e-05	2.38e-05	1.03	30.5	0.00073	0.74	1.68	-0.0631 : 1384.3	0.226 : 1387.6	0.606 : 1388.7	0.637 : 1386.5	0.639 : 1383.2	1.01 : 1389.8	1.05 : 1391.10	1.07 : 1382.1	1.15 : 1385.4	1.22 : 1390.9	67996	0	0	NaN	NaN	1	0	0.33031	0	0	-1.79719	0	0
ENSMUSG00000069135	FGFR1OP		FGFR1OP	A	FGFR1 oncogene partner	nucleus|centrosome|cytosol|perinuclear region of cytoplasm|	G2/M transition of mitotic cell cycle|mitotic cell cycle|negative regulation of protein kinase activity|positive regulation of cell proliferation|peptidyl-tyrosine phosphorylation|positive regulation of cell growth|positive regulation of cell migration|microtubule anchoring|negative regulation of protein tyrosine kinase activity|	protein tyrosine kinase activity|protein binding|protein kinase binding|protein tyrosine kinase inhibitor activity|protein homodimerization activity|	10	0	0	0.889	5.41e-05	0.00016	-2.5	32	0.00083	-3.96	-2	-2.67 : 180344.1	-2.63 : 180349.6	-2.38 : 180350.7	-1.3 : 180346.3	-1.16 : 180353.10	-0.855 : 180347.4	-0.826 : 180345.2	-0.424 : 180351.8	-0.145 : 180352.9	0.256 : 180348.5	75296	0	0	NaN	NaN	1	0	0.763873	1	0	-4.64212	0	0
ENSMUSG00000022400	RBX1		RBX1	D	ring-box 1, E3 ubiquitin protein ligase	nucleoplasm|cytosol|cytosol|SCF ubiquitin ligase complex|SCF ubiquitin ligase complex|VCB complex|cullin-RING ubiquitin ligase complex|Cul2-RING ubiquitin ligase complex|Cul3-RING ubiquitin ligase complex|Cul4A-RING E3 ubiquitin ligase complex|Cul4B-RING E3 ubiquitin ligase complex|Cul5-RING ubiquitin ligase complex|Cul7-RING ubiquitin ligase complex|	DNA repair|protein monoubiquitination|Notch signaling pathway|viral process|protein ubiquitination|SCF-dependent proteasomal ubiquitin-dependent protein catabolic process|SCF-dependent proteasomal ubiquitin-dependent protein catabolic process|proteasome-mediated ubiquitin-dependent protein catabolic process|protein neddylation|regulation of transcription from RNA polymerase II promoter in respons…	ubiquitin-protein transferase activity|ubiquitin-protein transferase activity|protein binding|zinc ion binding|NEDD8 ligase activity|ubiquitin protein ligase binding|protein complex binding|	10	-3.2	17.6	0.277	0.000112	0.000442	-3.2	26	0.00083	-6	-0.9	-3.33 : 218653.5	-1.06 : 218656.8	-1.06 : 218657.9	-0.614 : 218651.3	-0.447 : 218649.1	-0.385 : 218658.10	-0.382 : 218654.6	-0.352 : 218655.7	-0.27 : 218652.4	-0.137 : 218650.2	56438	0	0	NaN	NaN	1	0	0.344407	0	0	-11.3533	1	0
ENSMUSG00000041408	WAPAL	WAPL	WAPL	A	wings apart-like homolog (Drosophila)	chromosome, centromeric region|chromatin|synaptonemal complex|nucleus|nucleoplasm|chromosome|cytoplasm|cytosol|cohesin complex|microtubule cytoskeleton|intracellular membrane-bounded organelle|	mitotic cell cycle|mitotic nuclear division|negative regulation of DNA replication|response to toxic substance|viral process|negative regulation of chromatin binding|negative regulation of sister chromatid cohesion|protein localization to chromatin|regulation of cohesin localization to chromatin|	protein binding|	10	-2.2	21.4	0.115	2.44e-06	2.48e-06	-2.02	32	0.00083	-3.15	-1.21	-2.32 : 62534.4	-1.96 : 62536.6	-1.42 : 62531.1	-1.35 : 62533.3	-0.807 : 62537.7	-0.766 : 62538.8	-0.696 : 62540.10	-0.627 : 62532.2	-0.534 : 62539.9	-0.0624 : 62535.5	218914	0	0	NaN	NaN	1	0	NaN	NaN	NaN	-6.6051	1	0
ENSMUSG00000020319	WDPCP		WDPCP	B	WD repeat containing planar cell polarity effector	cytoskeleton|plasma membrane|axoneme|cell cortex|apical plasma membrane|	regulation of embryonic cell shape|septin cytoskeleton organization|regulation of protein localization|cilium morphogenesis|	None	10	0.2	0.141	0.913	0.0714	0.00287	-2.4	27.3	0.00084	-4.08	-1.77	-2.52 : 196868.7	-2.44 : 196870.9	-1.48 : 196863.2	-1.48 : 196871.10	-1.25 : 196862.1	-0.813 : 196867.6	-0.00865 : 196866.5	0.389 : 196865.4	0.537 : 196864.3	0.585 : 196869.8	216560	0	0	NaN	1	1	0	0.455407	0	0	-0.483938	0	0
ENSMUSG00000051748	1100001G20RIK	WFDC21	WFDC21P	D	N/A	None	None	None	10	-0.2	0.56	0.878	0.737	0.229	3.27	25.9	0.00086	2.45	6	-2.52 : 172494.1	-1.99 : 172498.5	-0.847 : 172497.4	-0.701 : 172495.2	0.0727 : 172499.6	0.273 : 172502.9	0.446 : 172496.3	1.11 : 172500.7	1.11 : 172501.8	3.43 : 172503.10	66107	0	0	NaN	NaN	1	0	NaN	NaN	NaN	-4.79957	0	1
ENSMUSG00000024472	DCP2		DCP2	C	decapping mRNA 2	cytoplasmic mRNA processing body|nucleus|cytosol|RISC complex|	nuclear-transcribed mRNA catabolic process, nonsense-mediated decay|nuclear-transcribed mRNA catabolic process, deadenylation-dependent decay|mRNA catabolic process|gene expression|RNA metabolic process|mRNA metabolic process|exonucleolytic nuclear-transcribed mRNA catabolic process involved in deadenylation-dependent decay|histone mRNA catabolic process|RNA phosphodiester bond hydrolysis, exonuc…	RNA binding|protein binding|exoribonuclease activity, producing 5'-phosphomonoesters|manganese ion binding|m7G(5')pppN diphosphatase activity|	10	-0.4	5.48	0.518	0.0012	4.09e-05	-1.53	30	0.00086	-2.41	-1.08	-1.75 : 195487.4	-1.57 : 195489.6	-1.32 : 195491.8	-1.32 : 195490.7	-1.26 : 195493.10	-0.823 : 195492.9	-0.652 : 195486.3	-0.563 : 195488.5	0.494 : 195484.1	0.521 : 195485.2	70640	0	0	NaN	NaN	1	0	0.637948	0	0	1.08852	0	0
ENSMUSG00000034390	CMIP		CMIP	A	c-Maf inducing protein	nucleus|cytoplasm|	None	protein binding|	10	0	0	0.889	3.75e-06	6.05e-06	-1.1	31.8	0.00089	-1.75	-0.76	-1.38 : 78820.1	-1.31 : 78822.3	-1.04 : 78824.5	-1.03 : 78828.9	-1.01 : 78825.6	-0.982 : 78823.4	-0.84 : 78826.7	-0.711 : 78827.8	-0.445 : 78829.10	0.00883 : 78821.2	74440	0	0	NaN	NaN	1	0	0.40236	0	0	NaN	NaN	NaN
ENSMUSG00000026361	CDC73		CDC73	A	cell division cycle 73	nucleus|Cdc73/Paf1 complex|	negative regulation of transcription from RNA polymerase II promoter|endodermal cell fate commitment|transcription, DNA-templated|mRNA polyadenylation|cell cycle|negative regulation of cell proliferation|histone monoubiquitination|Wnt signaling pathway|stem cell maintenance|positive regulation of Wnt signaling pathway|positive regulation of mRNA 3'-end processing|protein destabilization|positive …	RNA polymerase II core binding|protein binding|	9	-4.6	74.4	0.00042	4.25e-06	7.15e-05	-1.8	31.5	0.00092	-3.03	-1.18	-2.09 : 158189.9	-1.84 : 158184.4	-1.53 : 158187.7	-1.14 : 158186.6	-1.1 : 158188.8	-1.03 : 158181.1	-0.544 : 158190.10	-0.38 : 158183.3	-0.235 : 158182.2		214498	0	-1	NaN	NaN	NaN	NaN	0.387713	0	0	-5.1538	1	0
ENSMUSG00000031783	POLR2C		POLR2C	C	polymerase (RNA) II (DNA directed) polypeptide C, 33kDa	nucleus|nucleoplasm|DNA-directed RNA polymerase II, core complex|cytoplasm|microtubule cytoskeleton|	mRNA splicing, via spliceosome|DNA repair|transcription-coupled nucleotide-excision repair|nucleotide-excision repair|transcription from RNA polymerase II promoter|transcription from RNA polymerase II promoter|transcription initiation from RNA polymerase II promoter|transcription elongation from RNA polymerase II promoter|7-methylguanosine mRNA capping|RNA splicing|gene expression|viral process|p…	RNA polymerase II activity|DNA binding|protein dimerization activity|	5	-4.1	85	7e-05	0.128	0.324	-3.2	29.8	0.00092	-6	-2.61	-3.22 : 14437.2	-1.65 : 14445.10	-0.296 : 14438.3	0.00659 : 14444.9	0.292 : 14439.4						20021	0	-1	NaN	NaN	NaN	NaN	0.422117	0	0	-12.6628	1	0
ENSMUSG00000031826	USP10		USP10	B	ubiquitin specific peptidase 10	nucleus|cytoplasm|early endosome|intermediate filament cytoskeleton|	DNA repair|ubiquitin-dependent protein catabolic process|autophagy|regulation of autophagy|protein deubiquitination|protein deubiquitination|DNA damage response, signal transduction by p53 class mediator|	p53 binding|cysteine-type endopeptidase activity|ubiquitin thiolesterase activity|ubiquitin thiolesterase activity|ubiquitin-specific protease activity|ubiquitin-specific protease activity|protein binding|ion channel binding|poly(A) RNA binding|	10	-0.9	21.9	0.129	0.0014	0.000129	-1.23	27.1	0.00093	-2.3	-0.77	-1.77 : 135126.9	-1.27 : 135123.6	-1.1 : 135121.4	-1.01 : 135118.1	-0.902 : 135125.8	-0.796 : 135122.5	-0.772 : 135124.7	-0.426 : 135120.3	0.329 : 135127.10	0.708 : 135119.2	22224	0	0	NaN	NaN	1	0	0.26086	0	0	-2.18351	0	0
ENSMUSG00000038383	PIGU		PIGU	C	phosphatidylinositol glycan anchor biosynthesis, class U	endoplasmic reticulum membrane|plasma membrane|membrane|integral component of endoplasmic reticulum membrane|GPI-anchor transamidase complex|	C-terminal protein lipidation|GPI anchor biosynthetic process|attachment of GPI anchor to protein|attachment of GPI anchor to protein|post-translational protein modification|cellular protein metabolic process|regulation of JAK-STAT cascade|	GPI-anchor transamidase activity|GPI anchor binding|	9	-0.7	6.72	0.452	2.13e-05	0.000176	-2.13	29.7	0.00096	-3.44	-1.15	-2.32 : 205961.9	-1.83 : 205953.1	-1.11 : 205954.2	-1.06 : 205958.6	-0.932 : 205956.4	-0.78 : 205959.7	-0.607 : 205957.5	-0.28 : 205960.8	-0.0128 : 205962.10		228812	0	0	NaN	NaN	1	0	0.412603	0	0	-0.418827	0	0
ENSMUSG00000062590	ARMC9		ARMC9	A	armadillo repeat containing 9	extracellular vesicular exosome|	None	None	10	0	0	0.889	0.000127	0.000286	-2.3	31.4	0.00098	-3.67	-1.6	-2.57 : 105656.2	-2.14 : 105662.8	-2.0 : 105660.6	-1.45 : 105663.9	-1.14 : 105655.1	-0.964 : 105659.5	-0.729 : 105657.3	-0.383 : 105664.10	-0.175 : 105658.4	0.824 : 105661.7	78795	0	0	NaN	NaN	1	0	0.712807	1	0	-1.69833	0	0
ENSMUSG00000030555	TTC23		TTC23	A	tetratricopeptide repeat domain 23	None	None	None	10	-0.2	0.571	0.741	3.57e-06	4.39e-05	-2.08	31.4	0.00098	-3.24	-1.3	-2.37 : 162891.7	-1.95 : 162893.9	-1.61 : 162890.6	-1.12 : 162886.2	-0.995 : 162889.5	-0.821 : 162892.8	-0.798 : 162885.1	-0.571 : 162887.3	-0.253 : 162888.4	-0.121 : 162894.10	67009	0	0	NaN	NaN	1	0	0.69983	0	1	1.92918	0	0
ENSMUSG00000039771	POLR2J		POLR2J	C	polymerase (RNA) II (DNA directed) polypeptide J, 13.3kDa	nucleus|nucleoplasm|DNA-directed RNA polymerase II, core complex|	mRNA splicing, via spliceosome|DNA repair|transcription-coupled nucleotide-excision repair|nucleotide-excision repair|transcription from RNA polymerase II promoter|transcription from RNA polymerase II promoter|transcription initiation from RNA polymerase II promoter|transcription elongation from RNA polymerase II promoter|7-methylguanosine mRNA capping|RNA splicing|gene expression|viral process|p…	RNA polymerase II activity|DNA binding|DNA-directed RNA polymerase activity|protein binding|LRR domain binding|protein dimerization activity|	9	-3.1	152	1e-05	0.0117	0.00231	-2.09	29.6	0.00099	-3.43	-1.54	-2.26 : 147690.8	-1.91 : 147692.10	-1.91 : 147691.9	-1.15 : 147683.1	-1.05 : 147688.6	-0.622 : 147689.7	-0.149 : 147686.4	0.578 : 147687.5	0.784 : 147684.2		20022	0	-1	NaN	NaN	NaN	NaN	0.21934	0	0	-13.4664	1	0
ENSMUSG00000035757	SELO	SELENOO	SELENOO	B	selenoprotein O	None	None	None	10	-0.7	4.1	0.507	0.00017	0.000114	-1.64	26.9	0.00099	-2.59	-0.95	-1.94 : 93748.2	-1.6 : 93747.1	-1.19 : 93755.9	-0.98 : 93752.6	-0.887 : 93750.4	-0.779 : 93754.8	-0.665 : 93753.7	-0.44 : 93749.3	0.104 : 93751.5	0.137 : 93756.10	223776	0	0	NaN	NaN	1	0	NaN	NaN	NaN	NaN	NaN	0
ENSMUSG00000024847	AIP		AIP	B	aryl hydrocarbon receptor interacting protein	nucleus|cytoplasm|cytosol|cytosol|plasma membrane|	protein targeting to mitochondrion|xenobiotic metabolic process|signal transduction|regulation of protein kinase A signaling|protein maturation by protein folding|negative regulation of cyclic-nucleotide phosphodiesterase activity|regulation of RNA biosynthetic process|regulation of RNA biosynthetic process|	transcription coactivator activity|signal transducer activity|protein binding|transcription factor binding|GAF domain binding|unfolded protein binding|	10	-0.5	4.11	0.506	0.000536	0.0105	-6.06	26.8	0.00103	-11.5	-5.37	-6.09 : 169560.3	-1.65 : 169559.2	-1.56 : 169564.7	-0.659 : 169562.5	-0.466 : 169558.1	-0.383 : 169566.9	-0.15 : 169565.8	-0.136 : 169561.4	-0.0854 : 169567.10	0.0307 : 169563.6	11632	0	0	NaN	NaN	1	0	0.21001	0	0	0.727583	0	0
ENSMUSG00000041431	CCNB1		CCNB1	A	cyclin B1	spindle pole|condensed nuclear chromosome outer kinetochore|nucleus|nucleoplasm|cytoplasm|centrosome|cytosol|membrane|	regulation of cyclin-dependent protein serine/threonine kinase activity|G1/S transition of mitotic cell cycle|G2/M transition of mitotic cell cycle|mitotic cell cycle|oocyte maturation|in utero embryonic development|negative regulation of protein phosphorylation|protein complex assembly|protein phosphorylation|mitotic nuclear envelope disassembly|mitotic metaphase plate congression|spermatogenesi…	patched binding|protein binding|kinase activity|protein kinase binding|	9	-4.4	136	1e-05	3.14e-06	4.45e-06	-2.17	31.2	0.00103	-3.22	-1.01	-2.45 : 77397.6	-1.54 : 77401.10	-1.3 : 77393.2	-1.23 : 77399.8	-1.06 : 77394.3	-0.77 : 77398.7	-0.765 : 77392.1	-0.752 : 77395.4	-0.171 : 77396.5		268697	0	-1	NaN	NaN	NaN	NaN	0.422987	0	0	-13.2021	1	1
ENSMUSG00000022635	ZCRB1		ZCRB1	C	zinc finger CCHC-type and RNA binding motif 1	nucleoplasm|U12-type spliceosomal complex|	mRNA processing|RNA splicing|	nucleotide binding|zinc ion binding|poly(A) RNA binding|	10	-1.9	14.6	0.223	0.0532	0.182	-3.11	29.4	0.00103	-6	-1.93	-3.16 : 33222.1	-1.57 : 33227.6	-1.2 : 33231.10	-0.621 : 33226.5	-0.214 : 33229.8	-0.0193 : 33225.4	0.0545 : 33228.7	0.0583 : 33230.9	0.1 : 33224.3	0.115 : 33223.2	67197	0	0	NaN	NaN	1	0	0.473677	0	0	0.98202	0	0
ENSMUSG00000029196	TADA2B		TADA2B	C	transcriptional adaptor 2B	STAGA complex|SAGA-type complex|	chromatin organization|transcription, DNA-templated|regulation of transcription, DNA-templated|	DNA binding|chromatin binding|zinc ion binding|	10	1.1	35.4	0.0288	9.17e-07	1.63e-06	-0.99	29.2	0.00107	-1.61	-0.68	-1.18 : 179904.1	-1.12 : 179910.7	-1.01 : 179912.9	-0.939 : 179906.3	-0.893 : 179913.10	-0.864 : 179911.8	-0.756 : 179907.4	-0.509 : 179905.2	-0.382 : 179909.6	-0.317 : 179908.5	231151	0	0	NaN	NaN	1	0	NaN	NaN	NaN	NaN	NaN	0
ENSMUSG00000041346	WRAP53		WRAP53	C	WD repeat containing, antisense to TP53	nucleus|telomerase holoenzyme complex|cytoplasm|Cajal body|	telomere formation via telomerase|positive regulation of telomerase activity|	RNA binding|protein binding|	10	-0.8	23.1	0.109	0.00411	0.0139	-2.37	28.8	0.00111	-3.74	-1.87	-2.5 : 114129.7	-2.38 : 114131.9	-1.84 : 114132.10	-1.06 : 114128.6	-0.901 : 114124.2	-0.431 : 114125.3	-0.208 : 114127.5	-0.132 : 114130.8	0.245 : 114126.4	0.348 : 114123.1	216853	0	0	NaN	NaN	1	0	0.580463	0	0	0.135926	0	0
ENSMUSG00000039105	ATP6V1G1		ATP6V1G1	B	ATPase, H+ transporting, lysosomal 13kDa, V1 subunit G1	lysosomal membrane|cytosol|cytosol|plasma membrane|plasma membrane|vacuolar proton-transporting V-type ATPase complex|extracellular vesicular exosome|	cellular iron ion homeostasis|insulin receptor signaling pathway|proton transport|transferrin transport|interaction with host|transmembrane transport|phagosome maturation|	hydrolase activity, acting on acid anhydrides, catalyzing transmembrane movement of substances|ATPase binding|	10	-4.2	160	1e-05	0.0923	0.0848	-2.65	26.6	0.00112	-4.53	-2.15	-2.76 : 89337.4	-2.62 : 89342.9	-2.21 : 89339.6	-2.2 : 89335.2	-0.284 : 89341.8	-0.241 : 89343.10	-0.0998 : 89336.3	0.195 : 89334.1	0.566 : 89340.7	0.686 : 89338.5	66290	0	-1	NaN	NaN	NaN	NaN	0.29453	0	0	-2.3222	0	0
ENSMUSG00000050552	LAMTOR4		LAMTOR4	B	late endosomal/lysosomal adaptor, MAPK and MTOR activator 4	lysosome|intracellular membrane-bounded organelle|Ragulator complex|	regulation of cell size|positive regulation of TOR signaling|positive regulation of GTPase activity|protein localization to lysosome|cellular response to amino acid stimulus|	guanyl-nucleotide exchange factor activity|protein complex scaffold|	10	-0.7	13.4	0.228	0.000352	0.000373	-1.73	26.6	0.00112	-2.68	-1.26	-1.93 : 167427.6	-1.75 : 167430.9	-1.56 : 167428.7	-1.35 : 167425.4	-1.26 : 167424.3	-0.516 : 167423.2	-0.293 : 167429.8	-0.241 : 167426.5	-0.215 : 167422.1	0.764 : 167431.10	66096	0	0	NaN	NaN	1	0	0.220883	0	0	NaN	NaN	0
ENSMUSG00000038644	POLD1		POLD1	A	polymerase (DNA directed), delta 1, catalytic subunit	nucleotide-excision repair complex|nucleus|nucleoplasm|cytoplasm|membrane|aggresome|delta DNA polymerase complex|	mitotic cell cycle|telomere maintenance via recombination|telomere maintenance|DNA synthesis involved in DNA repair|DNA synthesis involved in DNA repair|DNA replication|DNA strand elongation involved in DNA replication|DNA repair|transcription-coupled nucleotide-excision repair|base-excision repair|base-excision repair, gap-filling|nucleotide-excision repair|nucleotide-excision repair, DNA gap fi…	nucleotide binding|DNA binding|chromatin binding|DNA-directed DNA polymerase activity|protein binding|3'-5' exonuclease activity|metal ion binding|4 iron, 4 sulfur cluster binding|	10	-3.9	85.2	9e-05	0.00205	0.00625	-3.46	30.6	0.00115	-6.51	-2.39	-3.6 : 86824.10	-2.52 : 86822.8	-0.811 : 86823.9	-0.773 : 86819.5	-0.526 : 86815.1	-0.285 : 86821.7	-0.237 : 86818.4	-0.213 : 86817.3	0.0328 : 86820.6	0.273 : 86816.2	18971	0	-1	NaN	NaN	NaN	NaN	0.356903	0	0	-4.85989	0	0
ENSMUSG00000024231	CUL2		CUL2	B	cullin 2	nucleus|nucleoplasm|cytosol|VCB complex|Cul2-RING ubiquitin ligase complex|	G1/S transition of mitotic cell cycle|ubiquitin-dependent protein catabolic process|cell cycle arrest|negative regulation of cell proliferation|viral process|protein ubiquitination|regulation of transcription from RNA polymerase II promoter in response to hypoxia|cellular response to hypoxia|intrinsic apoptotic signaling pathway|	protein binding|ubiquitin protein ligase binding|protein complex binding|	10	-3.2	83.7	0.00017	0.000594	0.000318	-2.47	26.5	0.00116	-4.3	-1.77	-2.63 : 208083.2	-2.48 : 208086.5	-1.07 : 208085.4	-0.939 : 208090.9	-0.86 : 208087.6	-0.758 : 208091.10	-0.694 : 208088.7	-0.356 : 208084.3	0.0836 : 208089.8	0.669 : 208082.1	71745	0	-1	NaN	NaN	NaN	NaN	0.491053	0	0	-4.26272	0	0
ENSMUSG00000070923	KLHL9		KLHL9	C	kelch-like family member 9	midbody|Cul3-RING ubiquitin ligase complex|	cytokinesis|mitotic nuclear division|protein ubiquitination|protein ubiquitination|	ubiquitin-protein transferase activity|	9	-1.6	45.5	0.011	0.000123	0.00108	-2.02	28.6	0.00116	-3.33	-1.26	-2.21 : 146313.7	-1.95 : 146311.5	-1.25 : 146316.10	-1.2 : 146309.3	-1.12 : 146310.4	-0.938 : 146314.8	-0.367 : 146315.9	-0.0738 : 146308.2	0.0584 : 146307.1		242521	1	0	NaN	NaN	1	0	0.566777	0	0	-6.02962	0	0
ENSMUSG00000050709	4932442E05RIK			D	RIKEN cDNA 4932442E05 gene	cellular_component|	biological_process|	molecular_function|	10	-0.2	0.592	0.875	0.0142	0.0432	-4.03	25	0.00117	-8	-2.7	-4.11 : 45963.5	-1.34 : 45959.1	-0.89 : 45965.7	-0.844 : 45967.9	-0.464 : 45960.2	-0.426 : 45962.4	-0.134 : 45964.6	-0.065 : 45961.3	0.209 : 45966.8	0.398 : 45968.10	74415	3	0	NaN	NaN	1	0	NaN	NaN	NaN	NaN	NaN	NaN
ENSMUSG00000012483	RPA3		RPA3	A	replication protein A3, 14kDa	nucleoplasm|DNA replication factor A complex|	G1/S transition of mitotic cell cycle|mitotic cell cycle|nucleotide-excision repair, DNA damage removal|telomere maintenance via recombination|telomere maintenance|double-strand break repair via homologous recombination|double-strand break repair via homologous recombination|DNA recombinase assembly|DNA replication|DNA replication|DNA strand elongation involved in DNA replication|DNA repair|trans…	damaged DNA binding|single-stranded DNA binding|protein binding|	8	-6.6	99.9	3e-05	0.14	0.0885	-3.14	30.4	0.00118	-5.87	-2.52	-3.25 : 143672.6	-2.49 : 143674.8	-0.643 : 143671.5	-0.249 : 143668.2	-0.198 : 143670.4	-0.168 : 143675.9	0.559 : 143676.10	1.05 : 143669.3			68240	0	-1	NaN	NaN	NaN	NaN	NaN	NaN	NaN	-7.14975	0	0
ENSMUSG00000023004	TUBA1B		TUBA1B	B	tubulin, alpha 1b	microtubule|microtubule|cytoplasmic microtubule|extracellular vesicular exosome|	microtubule cytoskeleton organization|GTP catabolic process|protein folding|microtubule-based process|cytoskeleton-dependent intracellular transport|cellular protein metabolic process|'de novo' posttranslational protein folding|protein polymerization|cell division|cellular response to interleukin-4|	double-stranded RNA binding|GTPase activity|structural molecule activity|structural constituent of cytoskeleton|protein binding|GTP binding|	6	-7.4	184	1e-05	0.000121	0.00081	-1.7	26.4	0.00123	-2.81	-1.24	-1.86 : 5920.5	-1.69 : 5925.10	-1.34 : 5922.7	-1.25 : 5917.2	-0.846 : 5916.1	-0.239 : 5918.3					22143	4	-1	1	NaN	NaN	NaN	0.42358	0	0	-14.128	1	0
ENSMUSG00000072235	TUBA1A		TUBA1A	A	tubulin, alpha 1a	nucleus|cytosol|microtubule|microtubule|cytoplasmic microtubule|cytoplasmic ribonucleoprotein granule|extracellular vesicular exosome|	G2/M transition of mitotic cell cycle|mitotic cell cycle|GTP catabolic process|protein folding|microtubule-based process|cytoskeleton-dependent intracellular transport|cellular protein metabolic process|'de novo' posttranslational protein folding|protein polymerization|cell division|	GTPase activity|structural molecule activity|structural constituent of cytoskeleton|protein binding|GTP binding|protein domain specific binding|	8	-3.8	94.9	3e-05	0.15	0.0401	-2.82	29.8	0.00128	-4.6	-1.72	-2.98 : 122939.3	-1.96 : 122942.6	-1.8 : 122943.7	-1.76 : 122944.8	-0.329 : 122937.1	0.314 : 122940.4	0.318 : 122941.5	1.76 : 122938.2			22142	2	-1	NaN	NaN	NaN	NaN	0.385215	0	0	-8.09817	1	0
ENSMUSG00000006464	BBS1		BBS1	C	Bardet-Biedl syndrome 1	cytoplasm|microtubule organizing center|BBSome|ciliary membrane|	retina homeostasis|visual perception|nonmotile primary cilium assembly|cilium assembly|Golgi to plasma membrane protein transport|photoreceptor cell maintenance|response to stimulus|	RNA polymerase II repressing transcription factor binding|patched binding|smoothened binding|protein binding|	10	-0.3	2.04	0.771	0.000119	0.00133	-2.63	28.2	0.00129	-4.09	-1.41	-2.78 : 9098.3	-1.84 : 9103.8	-1.78 : 9099.4	-1.17 : 9097.2	-1.03 : 9101.6	-0.476 : 9096.1	-0.42 : 9100.5	-0.228 : 9104.9	-0.161 : 9105.10	0.185 : 9102.7	52028	0	0	NaN	1	1	0	0.527114	0	0	-1.51206	0	0
ENSMUSG00000030551	NR2F2		NR2F2	B	nuclear receptor subfamily 2, group F, member 2	nucleus|	negative regulation of transcription from RNA polymerase II promoter|neuron migration|maternal placenta development|negative regulation of endothelial cell proliferation|transcription, DNA-templated|regulation of transcription from RNA polymerase II promoter|lipid metabolic process|signal transduction|skeletal muscle tissue development|fertilization|anterior/posterior pattern specification|radial…	retinoic acid binding|sequence-specific DNA binding transcription factor activity|sequence-specific DNA binding transcription factor activity|steroid hormone receptor activity|transcription corepressor activity|ligand-activated sequence-specific DNA binding RNA polymerase II transcription factor activity|protein binding|zinc ion binding|protein homodimerization activity|sequence-specific DNA bind…	10	-1.4	36	0.0245	4.86e-05	0.000212	-1.52	26	0.00132	-2.46	-1.03	-1.79 : 162932.8	-1.53 : 162925.1	-1.28 : 162929.5	-1.2 : 162927.3	-1.2 : 162930.6	-0.69 : 162934.10	-0.436 : 162931.7	-0.382 : 162928.4	-0.0282 : 162926.2	0.008 : 162933.9	11819	0	0	NaN	NaN	1	0	0.33233	0	0	-1.62954	0	1
ENSMUSG00000048154	KMT2D		KMT2D	A	lysine (K)-specific methyltransferase 2D	nucleus|histone methyltransferase complex|	oocyte growth|in utero embryonic development|chromatin silencing|transcription, DNA-templated|regulation of transcription, DNA-templated|positive regulation of cell proliferation|positive regulation of intracellular estrogen receptor signaling pathway|response to estrogen|positive regulation of transcription from RNA polymerase II promoter|oogenesis|histone H3-K4 methylation|	DNA binding|protein binding|zinc ion binding|histone-lysine N-methyltransferase activity|transcription regulatory region DNA binding|	10	-3.6	19.2	0.164	1.12e-06	8.26e-06	-1.91	29.7	0.00135	-2.88	-0.9	-2.23 : 191177.2	-1.58 : 191178.3	-1.23 : 191179.4	-1.1 : 191182.7	-1.05 : 191185.10	-0.957 : 191184.9	-0.688 : 191181.6	-0.458 : 191180.5	-0.426 : 191176.1	-0.259 : 191183.8	381022	0	0	NaN	NaN	1	0	0.389136	0	0	NaN	NaN	0
ENSMUSG00000093769	HIST2H3C1		HIST1H3C	B	histone cluster 2, H3c1	nuclear chromosome|nucleus|nucleus|membrane|protein complex|extracellular vesicular exosome|	negative regulation of transcription from RNA polymerase II promoter|DNA replication-dependent nucleosome assembly|regulation of gene silencing|	chromatin binding|	10	-1.7	33	0.0326	0.000282	0.000294	-1.8	25.9	0.00138	-2.73	-1.22	-1.96 : 179223.10	-1.87 : 179216.3	-1.36 : 179219.6	-1.05 : 179217.4	-0.913 : 179214.1	-0.574 : 179218.5	-0.432 : 179222.9	-0.36 : 179220.7	-0.116 : 179215.2	0.67 : 179221.8	15077	2	0	NaN	NaN	1	0	NaN	NaN	NaN	NaN	NaN	NaN
ENSMUSG00000005698	CTCF		CTCF	A	CCCTC-binding factor (zinc finger protein)	chromosome, centromeric region|condensed chromosome|nucleus|nucleoplasm|nucleolus|	negative regulation of transcription from RNA polymerase II promoter|regulation of gene expression by genetic imprinting|transcription, DNA-templated|chromosome segregation|maintenance of DNA methylation|positive regulation of gene expression|chromatin modification|nucleosome positioning|regulation of histone methylation|regulation of histone acetylation|regulation of gene expression, epigenetic|…	RNA polymerase II core promoter proximal region sequence-specific DNA binding|RNA polymerase II core promoter proximal region sequence-specific DNA binding transcription factor activity involved in negative regulation of transcription|sequence-specific DNA binding transcription factor activity|transcription corepressor activity|protein binding|zinc ion binding|chromatin insulator sequence binding…	10	-3.2	43.4	0.0129	0.102	0.00208	-2.12	29.6	0.0014	-3.4	-1.3	-2.39 : 12132.7	-1.93 : 12126.1	-1.46 : 12127.2	-1.4 : 12131.6	-1.19 : 12135.10	-1.15 : 12129.4	0.185 : 12130.5	0.298 : 12134.9	0.645 : 12133.8	0.975 : 12128.3	13018	0	0	NaN	NaN	1	0	0.37296	0	0	-0.688951	0	0
ENSMUSG00000030753	THAP12	PRKRIR	THAP12	B	protein-kinase, interferon-inducible double stranded RNA dependent inhibitor, repressor of (P58 repressor)	nucleus|	response to stress|signal transduction|negative regulation of cell proliferation|	DNA binding|metal ion binding|protein dimerization activity|	9	-3.9	47.9	0.0105	0.0578	0.0682	-3.37	25.8	0.00141	-6	-0.98	-3.42 : 46790.2	-0.932 : 46798.10	-0.809 : 46791.3	-0.393 : 46794.6	-0.311 : 46795.7	-0.229 : 46796.8	-0.0103 : 46792.4	0.324 : 46793.5	0.51 : 46797.9		72981	0	0	NaN	NaN	1	0	NaN	NaN	NaN	NaN	NaN	0
ENSMUSG00000035161	INTS6		INTS6	C	integrator complex subunit 6	nucleus|actin cytoskeleton|integrator complex|	signal transduction|snRNA processing|	transmembrane signaling receptor activity|protein binding|	10	0.4	5.69	0.506	1.96e-05	4.91e-06	0.94	28	0.00142	0.62	1.68	-0.253 : 82523.10	0.426 : 82516.3	0.559 : 82518.5	0.673 : 82520.7	0.73 : 82515.2	0.782 : 82521.8	0.872 : 82522.9	0.962 : 82517.4	1.05 : 82514.1	1.37 : 82519.6	18130	0	0	NaN	NaN	1	0	0.566713	0	0	-4.22976	0	0
ENSMUSG00000020807	4933427D14RIK		KIAA0753	A	RIKEN cDNA 4933427D14 gene	cytoplasm|centrosome|	biological_process|	molecular_function|	10	-1	1.19	0.651	0.00106	0.00338	-2.85	29.3	0.00145	-4.83	-1.44	-3.05 : 109377.6	-1.97 : 109375.4	-1.45 : 109372.1	-1.13 : 109381.10	-0.807 : 109380.9	-0.789 : 109376.5	-0.361 : 109373.2	-0.0443 : 109374.3	0.115 : 109378.7	0.174 : 109379.8	74477	0	0	NaN	1	1	0	0.882123	1	0	-0.263527	0	0
ENSMUSG00000027655	DHX35		DHX35	C	DEAH (Asp-Glu-Ala-His) box polypeptide 35	catalytic step 2 spliceosome|	mRNA splicing, via spliceosome|ATP catabolic process|	nucleic acid binding|ATP binding|ATP-dependent helicase activity|	10	-0.3	2.22	0.756	3.83e-06	1.72e-06	-0.97	27.9	0.00146	-1.68	-0.65	-1.38 : 98736.5	-1.03 : 98735.4	-0.954 : 98740.9	-0.918 : 98739.8	-0.85 : 98732.1	-0.85 : 98738.7	-0.698 : 98737.6	-0.651 : 98741.10	-0.567 : 98733.2	-0.000806 : 98734.3	71715	0	0	NaN	NaN	1	0	0.452933	0	0	-1.4519	0	0
ENSMUSG00000028873	CDCA8		CDCA8	B	cell division cycle associated 8	chromosome, centromeric region|nucleus|nucleolus|spindle|cytosol|chromocenter|midbody|chromosome passenger complex|protein complex|intercellular bridge|	mitotic metaphase|mitotic cell cycle|mitotic nuclear division|chromosome organization|	protein binding|	8	-6.8	147	1e-05	0.000127	0.000101	-1.91	25.5	0.00154	-3.22	-1.05	-2.11 : 205549.1	-1.63 : 205557.9	-1.26 : 205554.6	-0.868 : 205558.10	-0.838 : 205550.2	-0.611 : 205555.7	-0.478 : 205551.3	0.119 : 205556.8			52276	0	-1	NaN	NaN	NaN	NaN	0.480197	0	0	-13.8522	1	0
ENSMUSG00000040028	ELAVL1		ELAVL1	C	ELAV like RNA binding protein 1	nucleus|nucleoplasm|cytoplasm|cytosol|membrane|	multicellular organismal development|gene expression|RNA metabolic process|mRNA metabolic process|positive regulation of translation|mRNA stabilization|mRNA stabilization|3'-UTR-mediated mRNA stabilization|3'-UTR-mediated mRNA stabilization|regulation of stem cell maintenance|	nucleotide binding|RNA binding|double-stranded RNA binding|mRNA binding|mRNA 3'-UTR binding|protein binding|AU-rich element binding|protein kinase binding|mRNA 3'-UTR AU-rich region binding|poly(A) RNA binding|	10	0.6	7.38	0.422	7.2e-05	0.000245	-1.18	27.7	0.00154	-1.82	-0.87	-1.39 : 97114.10	-1.28 : 97112.8	-1.18 : 97105.1	-1.13 : 97110.6	-1.01 : 97113.9	-0.887 : 97107.3	-0.845 : 97108.4	-0.223 : 97109.5	-0.102 : 97111.7	0.121 : 97106.2	15568	0	0	NaN	NaN	1	0	NaN	NaN	NaN	-10.1388	1	0
ENSMUSG00000001289	PFDN5		PFDN5	C	prefoldin subunit 5	nucleus|cytoplasm|prefoldin complex|	regulation of transcription, DNA-templated|protein folding|cellular protein metabolic process|negative regulation of transcription, DNA-templated|'de novo' posttranslational protein folding|retina development in camera-type eye|negative regulation of canonical Wnt signaling pathway|	transcription corepressor activity|protein binding|unfolded protein binding|	10	-1.2	2.02	0.773	0.00449	0.0036	-1.77	27.7	0.00154	-3.05	-1.27	-2.0 : 133466.6	-1.71 : 133467.7	-1.71 : 133470.10	-1.27 : 133465.5	-1.18 : 133461.1	-0.741 : 133469.9	-0.256 : 133468.8	-0.0638 : 133464.4	0.272 : 133463.3	0.419 : 133462.2	56612	0	0	NaN	NaN	1	0	0.342095	0	0	-3.38434	0	0
ENSMUSG00000040325	VPRBP		DCAF1	A	Vpr (HIV-1) binding protein	nucleus|cytoplasm|COP9 signalosome|	negative regulation of transcription from RNA polymerase II promoter|transcription, DNA-templated|viral process|protein ubiquitination|B cell differentiation|V(D)J recombination|cell competition in a multicellular organism|histone H2A-T120 phosphorylation|	protein binding|ATP binding|histone kinase activity (H2A-T120 specific)|	10	-2.7	47.3	0.00877	0.0111	0.0173	-3.49	29.1	0.00155	-7	-1.5	-3.63 : 79367.8	-1.64 : 79368.9	-0.809 : 79362.3	-0.751 : 79361.2	-0.695 : 79363.4	-0.349 : 79364.5	-0.271 : 79369.10	-0.1 : 79360.1	0.312 : 79365.6	1.41 : 79366.7	321006	0	0	NaN	NaN	1	0	NaN	NaN	NaN	-3.56504	0	0
ENSMUSG00000019943	ATP2B1		ATP2B1	B	ATPase, Ca++ transporting, plasma membrane 1	plasma membrane|integral component of plasma membrane|membrane|extracellular vesicular exosome|	transport|blood coagulation|metabolic process|ion transmembrane transport|transmembrane transport|calcium ion transmembrane transport|	calcium-transporting ATPase activity|protein binding|calmodulin binding|ATP binding|metal ion binding|	10	0	0	0.942	0.00806	0.00246	-2.3	25.2	0.00163	-3.53	-1.27	-2.48 : 196739.8	-1.78 : 196740.9	-1.5 : 196735.4	-1.14 : 196741.10	-0.978 : 196736.5	-0.978 : 196737.6	-0.231 : 196733.2	0.135 : 196734.3	0.171 : 196738.7	0.346 : 196732.1	67972	0	0	NaN	NaN	1	0	0.402963	0	0	-2.28638	0	0
ENSMUSG00000038773	KDM3B		KDM3B	C	lysine (K)-specific demethylase 3B	nucleus|	transcription, DNA-templated|regulation of transcription, DNA-templated|chromatin modification|oxidation-reduction process|	metal ion binding|dioxygenase activity|	10	-0.9	14.7	0.221	0.000522	0.000273	-1.16	27.6	0.00163	-1.79	-0.85	-1.28 : 218996.1	-1.24 : 218998.3	-1.22 : 219001.6	-1.14 : 218999.4	-1.07 : 219004.9	-0.878 : 219005.10	-0.793 : 219002.7	-0.209 : 218997.2	0.104 : 219000.5	0.275 : 219003.8	277250	0	0	NaN	NaN	1	0	0.398703	0	0	0.449784	0	0
ENSMUSG00000026134	PRIM2		PRIM2	A	primase, DNA, polypeptide 2 (58kDa)	nucleoplasm|primosome complex|	G1/S transition of mitotic cell cycle|mitotic cell cycle|telomere maintenance via recombination|telomere maintenance|DNA replication, synthesis of RNA primer|DNA replication initiation|DNA strand elongation involved in DNA replication|telomere maintenance via semi-conservative replication|	DNA binding|DNA primase activity|metal ion binding|4 iron, 4 sulfur cluster binding|	10	-2.8	41.7	0.0137	0.447	0.0771	-2.96	28.9	0.00166	-5.53	-1.53	-3.12 : 125959.6	-1.72 : 125963.10	-1.33 : 125958.5	-0.921 : 125961.8	-0.466 : 125955.2	-0.0712 : 125954.1	0.414 : 125962.9	0.49 : 125957.4	0.742 : 125956.3	0.995 : 125960.7	19076	0	0	NaN	NaN	1	0	0.498487	0	0	-1.66107	0	0
ENSMUSG00000055884	FANCM		FANCM	B	Fanconi anemia, complementation group M	nucleus|nucleoplasm|Fanconi anaemia nuclear complex|FANCM-MHF complex|	resolution of meiotic recombination intermediates|DNA repair|replication fork processing|nucleic acid phosphodiester bond hydrolysis|	DNA binding|chromatin binding|helicase activity|nuclease activity|protein binding|ATP binding|	10	-1.8	31.5	0.0386	0.00116	0.000316	-1.76	25.1	0.00167	-2.81	-0.81	-2.03 : 86588.4	-1.36 : 86587.3	-1.23 : 86594.10	-1.02 : 86591.7	-0.808 : 86592.8	-0.767 : 86586.2	-0.707 : 86593.9	-0.189 : 86585.1	0.0987 : 86590.6	1.26 : 86589.5	104806	0	0	NaN	NaN	1	0	0.687253	0	1	-1.18887	0	0
ENSMUSG00000075419	DOLK		DOLK	C	dolichol kinase	endoplasmic reticulum membrane|integral component of endoplasmic reticulum membrane|	dolichol-linked oligosaccharide biosynthetic process|dolichyl diphosphate biosynthetic process|phosphorylation|protein N-linked glycosylation via asparagine|dolichyl monophosphate biosynthetic process|post-translational protein modification|cellular protein metabolic process|	dolichol kinase activity|	8	-4.2	42.8	0.0142	0.0527	0.0744	-2.97	27.5	0.00169	-6	-1.71	-3.02 : 71092.1	-1.23 : 71099.8	-0.908 : 71095.4	-0.386 : 71098.7	-0.301 : 71094.3	-0.0783 : 71093.2	0.199 : 71101.10	0.564 : 71100.9			227697	0	0	NaN	NaN	1	0	0.241723	0	0	0.150368	0	0
ENSMUSG00000095562	GM21887			D	N/A	None	None	None	10	-5.3	181	1e-05	0.00156	0.0244	-2.76	24.1	0.00169	-4.46	-1.62	-2.95 : 190270.5	-2.19 : 190267.2	-1.95 : 190269.4	-1.22 : 190274.9	-1.02 : 190272.7	-0.27 : 190273.8	-0.163 : 190266.1	-0.148 : 190268.3	-0.0679 : 190275.10	0.187 : 190271.6	NaN	8	-1	NaN	NaN	NaN	NaN	NaN	NaN	NaN	NaN	NaN	NaN
ENSMUSG00000021555	NAA35		NAA35	A	N(alpha)-acetyltransferase 35, NatC auxiliary subunit	cytoplasm|cytoplasm|polysome|NatC complex|	negative regulation of apoptotic process|smooth muscle cell proliferation|	protein binding|	10	-0.1	0.119	0.843	2.61e-05	0.000104	-1.16	28.4	0.00185	-1.83	-0.82	-1.48 : 41482.8	-1.31 : 41480.6	-1.17 : 41484.10	-1.1 : 41478.4	-1.05 : 41476.2	-0.788 : 41479.5	-0.786 : 41483.9	-0.465 : 41481.7	-0.208 : 41477.3	0.145 : 41475.1	78689	0	0	NaN	NaN	1	0	NaN	NaN	NaN	-4.06232	0	0
ENSMUSG00000008958	VPS72		VPS72	A	vacuolar protein sorting 72 homolog (S. cerevisiae)	nucleus|nucleoplasm|protein complex|	negative regulation of transcription from RNA polymerase II promoter|chromatin organization|transcription, DNA-templated|chromatin modification|somatic stem cell maintenance|	DNA binding|protein binding|	10	-2.3	40.1	0.0145	0.000307	0.00012	-2.03	28.3	0.00185	-3.14	-1.07	-2.31 : 118703.2	-1.67 : 118706.5	-1.45 : 118704.3	-1.22 : 118705.4	-0.869 : 118709.8	-0.668 : 118702.1	-0.59 : 118710.9	-0.445 : 118711.10	-0.0333 : 118708.7	0.757 : 118707.6	21427	0	0	NaN	NaN	1	0	0.285859	0	0	-4.8829	0	0
ENSMUSG00000067909	SLXL1			D	Slx-like 1	acrosomal vesicle|cytoplasm|	spermatid development|single fertilization|binding of sperm to zona pellucida|sex determination|regulation of gene expression|spermatid differentiation|	protein binding|	9	-5	91.5	0.00014	0.0175	0.0242	2.67	23.7	0.00197	1.23	5	-0.461 : 127504.6	-0.0644 : 127502.4	0.0397 : 127499.1	0.0465 : 127500.2	0.638 : 127501.3	0.864 : 127508.10	0.981 : 127505.7	1.17 : 127503.5	2.89 : 127507.9		75140	9	-1	NaN	NaN	NaN	NaN	NaN	NaN	NaN	NaN	NaN	NaN
ENSMUSG00000081058	HIST2H3C2		HIST1H3G	C	histone cluster 2, H3c2	nuclear chromosome|nucleus|membrane|protein complex|extracellular vesicular exosome|	DNA replication-dependent nucleosome assembly|regulation of gene silencing|	molecular_function|	7	-4.1	85.5	7e-05	0.000413	0.00265	-2.35	26.9	0.00198	-3.7	-1.5	-2.46 : 181229.6	-1.81 : 181232.9	-1.6 : 181228.5	-1.12 : 181233.10	-0.876 : 181226.3	-0.216 : 181225.2	0.0148 : 181227.4				97114	7	-1	NaN	NaN	NaN	NaN	NaN	NaN	NaN	-20.211	1	0
ENSMUSG00000054405	DNAJC8		DNAJC8	B	DnaJ (Hsp40) homolog, subfamily C, member 8	nucleoplasm|	mRNA splicing, via spliceosome|RNA splicing|gene expression|	None	10	-1.9	43	0.0164	0.000225	0.00114	-2.4	24.4	0.00199	-3.93	-1.36	-2.57 : 218504.6	-1.95 : 218501.3	-1.57 : 218503.5	-1.22 : 218508.10	-0.722 : 218506.8	-0.657 : 218499.1	-0.375 : 218505.7	-0.278 : 218502.4	-0.123 : 218507.9	0.335 : 218500.2	68598	0	0	NaN	NaN	1	0	0.42255	0	0	-4.90619	0	0
ENSMUSG00000091625	LSM5		LSM5	C	LSM5 homolog, U6 small nuclear RNA associated (S. cerevisiae)	nucleus|spliceosomal complex|cytosol|	nuclear-transcribed mRNA catabolic process, deadenylation-dependent decay|mRNA processing|RNA splicing|gene expression|RNA metabolic process|mRNA metabolic process|exonucleolytic nuclear-transcribed mRNA catabolic process involved in deadenylation-dependent decay|	RNA binding|protein binding|	9	-4.2	118	1e-05	0.108	0.0143	2.25	26.8	0.00202	1.78	3.66	-0.679 : 97939.7	-0.386 : 97940.8	-0.279 : 97937.5	0.0617 : 97934.2	0.733 : 97936.4	1.34 : 97935.3	1.88 : 97933.1	2.32 : 97941.9	2.32 : 97938.6		66373	0	-1	NaN	NaN	NaN	NaN	0.461503	0	0	-7.32107	1	0
ENSMUSG00000035614	FAM179B		FAM179B	A	family with sequence similarity 179, member B	None	None	None	10	-0.7	2.06	0.561	5.26e-05	0.000346	-1.31	27.9	0.00204	-2.26	-0.8	-1.7 : 224706.5	-1.33 : 224709.8	-1.24 : 224710.9	-1.04 : 224711.10	-1.01 : 224707.6	-0.839 : 224705.4	-0.726 : 224708.7	-0.342 : 224704.3	-0.159 : 224703.2	0.176 : 224702.1	328108	0	0	NaN	NaN	1	0	0.764307	1	0	NaN	NaN	0
ENSMUSG00000000355	MCTS1		MCTS1	B	malignant T cell amplified sequence 1	cytoplasm|plasma membrane|cytosolic small ribosomal subunit|	formation of translation preinitiation complex|IRES-dependent translational initiation|transcription, DNA-templated|regulation of transcription, DNA-templated|cellular response to DNA damage stimulus|cell cycle|positive regulation of cell proliferation|ribosome disassembly|regulation of growth|	RNA binding|	9	-4	133	1e-05	0.00418	0.0103	-1.81	24.1	0.0021	-3.2	-1.25	-2.0 : 181101.8	-1.61 : 181096.3	-1.58 : 181094.1	-1.46 : 181098.5	-1.17 : 181102.9	-0.139 : 181095.2	-0.0425 : 181099.6	0.0248 : 181103.10	0.132 : 181097.4		68995	0	-1	NaN	NaN	NaN	NaN	0.32983	0	0	-0.866819	0	0
ENSMUSG00000026806	DDX31		DDX31	C	DEAD (Asp-Glu-Ala-Asp) box polypeptide 31	nucleus|nucleolus|	ATP catabolic process|	ATP binding|ATP-dependent helicase activity|poly(A) RNA binding|	10	-1.7	23.5	0.105	0.00206	0.00326	-1.85	26.6	0.00215	-3.08	-1.27	-2.07 : 186487.9	-1.73 : 186479.1	-1.56 : 186481.3	-1.48 : 186482.4	-1.0 : 186488.10	-0.791 : 186483.5	-0.28 : 186486.8	-0.169 : 186484.6	0.173 : 186485.7	0.481 : 186480.2	227674	0	0	NaN	NaN	1	0	0.595893	0	0	-1.45717	0	0
ENSMUSG00000002031	IFT46		IFT46	A	intraflagellar transport 46	nucleus|cytoplasm|motile primary cilium|motile cilium|ciliary basal body|protein complex|	biological_process|intraciliary transport|cilium assembly|protein stabilization|	molecular_function|protein C-terminus binding|	10	0.1	0.0142	0.884	0.000237	0.000485	-2.42	27.6	0.00227	-4.01	-1.89	-2.6 : 54899.10	-2.53 : 54895.6	-2.17 : 54898.9	-2.01 : 54893.4	-0.923 : 54896.7	-0.611 : 54894.5	-0.433 : 54892.3	-0.348 : 54890.1	0.064 : 54897.8	0.193 : 54891.2	76568	0	0	NaN	1	1	0	0.675041	0	1	-11.7554	0	0
ENSMUSG00000041133	SMC1A		SMC1A	B	structural maintenance of chromosomes 1A	chromosome, centromeric region|kinetochore|condensed chromosome kinetochore|condensed nuclear chromosome|nucleus|nucleoplasm|chromosome|cytoplasm|cytosol|cohesin core heterodimer|meiotic cohesin complex|	mitotic sister chromatid segregation|mitotic cell cycle|mRNA splicing, via spliceosome|DNA repair|mitotic spindle organization|sister chromatid cohesion|mitotic sister chromatid cohesion|mitotic cell cycle checkpoint|meiotic nuclear division|RNA splicing|response to radiation|gene expression|stem cell maintenance|negative regulation of DNA endoreduplication|signal transduction in response to DNA …	chromatin binding|microtubule motor activity|protein binding|ATP binding|mediator complex binding|poly(A) RNA binding|protein heterodimerization activity|	7	-5.3	64.3	0.00127	0.212	0.083	-3.44	23.9	0.00227	-6	-2.6	-3.47 : 1335.4	-0.601 : 1340.9	-0.492 : 1337.6	-0.456 : 1341.10	0.0586 : 1334.3	0.187 : 1336.5	1.17 : 1339.8				24061	0	-1	NaN	NaN	NaN	NaN	0.36778	0	0	-1.00788	0	0
ENSMUSG00000036980	TAF6		TAF6	B	TAF6 RNA polymerase II, TATA box binding protein (TBP)-associated factor, 80kDa	nucleus|nucleoplasm|transcription factor TFIID complex|cytoplasm|transcription factor TFTC complex|MLL1 complex|	DNA-templated transcription, initiation|regulation of transcription, DNA-templated|transcription from RNA polymerase II promoter|transcription from RNA polymerase II promoter|transcription initiation from RNA polymerase II promoter|transcription initiation from RNA polymerase II promoter|transcription elongation from RNA polymerase II promoter|negative regulation of cell proliferation|gene expres…	DNA binding|sequence-specific DNA binding transcription factor activity|sequence-specific DNA binding transcription factor activity|protein binding|protein heterodimerization activity|	10	-3.2	86.4	0.00012	0.0166	0.0184	-1.84	23.9	0.00227	-2.82	-1.35	-1.95 : 210309.4	-1.92 : 210311.6	-1.52 : 210306.1	-1.19 : 210308.3	-1.13 : 210315.10	-0.278 : 210313.8	-0.172 : 210307.2	0.0984 : 210310.5	0.178 : 210314.9	0.488 : 210312.7	21343	0	-1	NaN	NaN	NaN	NaN	0.465553	0	0	-2.52308	0	0
ENSMUSG00000014980	TSEN15		TSEN15	C	TSEN15 tRNA splicing endonuclease subunit	nucleolus|	tRNA splicing, via endonucleolytic cleavage and ligation|mRNA processing|RNA phosphodiester bond hydrolysis, endonucleolytic|	tRNA-intron endonuclease activity|	10	-2.4	50.1	0.00645	0.000181	0.00152	-1.56	26.4	0.00227	-2.48	-1.06	-1.69 : 130462.10	-1.66 : 130461.9	-1.28 : 130459.7	-1.21 : 130455.3	-1.2 : 130460.8	-0.719 : 130458.6	-0.413 : 130456.4	-0.261 : 130454.2	-0.129 : 130457.5	0.344 : 130453.1	66637	0	0	NaN	NaN	1	0	0.42383	0	0	0.406911	0	0
ENSMUSG00000005262	UFD1L		UFD1L	A	ubiquitin fusion degradation 1 like (yeast)	nucleus|cytosol|	skeletal system development|ubiquitin-dependent protein catabolic process|proteasome-mediated ubiquitin-dependent protein catabolic process|	ubiquitin-specific protease activity|receptor binding|protein binding|protein complex binding|	10	-3.5	59.4	0.00137	0.00731	0.0459	-3.54	27.6	0.00227	-7	-1.58	-3.68 : 23054.3	-1.64 : 23055.4	-1.14 : 23061.10	-1.02 : 23052.1	-0.58 : 23058.7	-0.196 : 23057.6	-0.0547 : 23059.8	-0.0434 : 23053.2	0.0233 : 23056.5	0.235 : 23060.9	22230	0	-1	NaN	NaN	NaN	NaN	0.271957	0	0	-8.71638	1	0
ENSMUSG00000055723	RRAS2		RRAS2	A	related RAS viral (r-ras) oncogene homolog 2	endoplasmic reticulum|plasma membrane|membrane|extracellular vesicular exosome|	osteoblast differentiation|GTP catabolic process|Ras protein signal transduction|positive regulation of cell migration|	GTPase activity|protein binding|GTP binding|	10	-1	15.2	0.178	6.69e-05	5.23e-05	-1.15	27.5	0.00231	-2.09	-0.75	-1.59 : 100177.9	-1.19 : 100178.10	-1.16 : 100173.5	-1.11 : 100169.1	-1.1 : 100172.4	-0.834 : 100171.3	-0.6 : 100176.8	-0.542 : 100174.6	-0.294 : 100175.7	0.532 : 100170.2	66922	0	0	NaN	NaN	1	0	0.363571	0	0	0.0339915	0	0
ENSMUSG00000021497	TXNDC15		TXNDC15	A	thioredoxin domain containing 15	integral component of membrane|	cell redox homeostasis|	None	10	-2.7	25.5	0.0598	0.000179	0.0009	-3.57	27.5	0.00231	-6.62	-2.62	-3.7 : 154998.8	-2.58 : 154999.9	-1.68 : 155000.10	-0.478 : 154996.6	-0.436 : 154997.7	-0.314 : 154992.2	-0.3 : 154995.5	-0.179 : 154993.3	-0.148 : 154991.1	-0.104 : 154994.4	69672	0	0	NaN	NaN	1	0	0.38729	0	0	-6.31065	0	0
ENSMUSG00000096278	DCPP2			D	demilune cell and parotid protein 2	cellular_component|	biological_process|	molecular_function|	9	-0.9	3.88	0.662	0.283	0.547	3.59	23.3	0.00234	3.01	6.97	-0.399 : 138057.10	-0.307 : 138056.9	-0.129 : 138050.3	-0.0545 : 138049.2	0.11 : 138052.5	0.19 : 138054.7	0.612 : 138051.4	1.02 : 138055.8	3.69 : 138053.6		630537	1	0	NaN	NaN	1	0	NaN	NaN	NaN	-1.54635	0	NaN
ENSMUSG00000022757	TFG		TFG	A	TRK-fused gene	cytoplasm|extracellular vesicular exosome|	signal transduction|cell death|positive regulation of I-kappaB kinase/NF-kappaB signaling|	signal transducer activity|protein binding|identical protein binding|	10	1.9	32.8	0.0227	2.24e-06	2.97e-05	-1.11	27.3	0.00241	-1.79	-0.74	-1.48 : 221065.2	-1.19 : 221072.9	-1.17 : 221069.6	-1.01 : 221067.4	-0.921 : 221066.3	-0.907 : 221068.5	-0.67 : 221071.8	-0.518 : 221064.1	-0.35 : 221073.10	-0.177 : 221070.7	21787	0	0	NaN	NaN	1	0	0.418223	0	0	-3.98344	0	0
ENSMUSG00000031864	INTS10		INTS10	A	integrator complex subunit 10	integrator complex|	snRNA processing|	protein binding|protein binding|	10	0.3	1.68	0.597	0.000145	0.000214	-1.16	27.2	0.00245	-1.81	-0.78	-1.38 : 25261.6	-1.38 : 25258.3	-1.09 : 25256.1	-0.988 : 25264.9	-0.96 : 25257.2	-0.941 : 25260.5	-0.922 : 25265.10	-0.178 : 25262.7	0.0101 : 25263.8	0.0974 : 25259.4	70885	0	0	NaN	NaN	1	0	0.328743	0	0	-0.613053	0	0
ENSMUSG00000038563	EFL1		EFL1	B	elongation factor Tu GTP binding domain containing 1	None	GTP catabolic process|translational elongation|mature ribosome assembly|	translation elongation factor activity|GTPase activity|GTP binding|ribosome binding|	10	-3.6	114	1e-05	0.000412	0.000801	-1.39	23.6	0.00248	-2.33	-0.97	-1.55 : 105880.1	-1.46 : 105887.8	-1.43 : 105881.2	-1.22 : 105889.10	-1.03 : 105886.7	-0.615 : 105884.5	-0.519 : 105882.3	-0.202 : 105885.6	0.0774 : 105888.9	0.182 : 105883.4	101592	0	-1	NaN	NaN	NaN	NaN	NaN	NaN	NaN	NaN	NaN	0
ENSMUSG00000025364	PA2G4		PA2G4	B	proliferation-associated 2G4, 38kDa	nucleus|nucleolus|cytoplasm|membrane|ribonucleoprotein complex|extracellular vesicular exosome|	transcription, DNA-templated|rRNA processing|regulation of translation|cell cycle arrest|cell proliferation|negative regulation of transcription, DNA-templated|	DNA binding|sequence-specific DNA binding transcription factor activity|protein binding|ubiquitin protein ligase binding|poly(A) RNA binding|	10	-1.5	22.4	0.12	0.405	0.592	-3.98	23.6	0.00248	-7.96	-3.44	-4.01 : 33670.1	-1.24 : 33671.2	-0.598 : 33678.9	-0.269 : 33673.4	-0.0831 : 33675.6	-0.0281 : 33676.7	0.00124 : 33674.5	0.231 : 33672.3	0.32 : 33677.8	0.736 : 33679.10	18813	0	0	NaN	NaN	1	0	0.251128	0	0	-3.23446	0	0
ENSMUSG00000009640	DMAP1		DMAP1	C	DNA methyltransferase 1 associated protein 1	nucleus|nucleus|nucleoplasm|replication fork|cytoplasm|NuA4 histone acetyltransferase complex|	negative regulation of transcription from RNA polymerase II promoter|DNA repair|DNA methylation|chromatin organization|chromatin remodeling|transcription, DNA-templated|regulation of growth|positive regulation of transcription factor import into nucleus|histone H4 acetylation|histone H2A acetylation|negative regulation of transcription, DNA-templated|	RNA polymerase II repressing transcription factor binding|chromatin binding|transcription corepressor activity|protein binding|	10	-4.3	150	1e-05	0.00412	0.00631	-1.88	26	0.00254	-2.81	-1.5	-1.94 : 200872.3	-1.91 : 200876.7	-1.91 : 200875.6	-1.48 : 200879.10	-0.675 : 200878.9	-0.572 : 200873.4	-0.2 : 200870.1	-0.0574 : 200871.2	0.0896 : 200877.8	0.708 : 200874.5	66233	0	-1	NaN	NaN	NaN	NaN	0.412827	0	0	-1.19926	0	0
ENSMUSG00000017776	CRK		CRK	B	v-crk avian sarcoma virus CT10 oncogene homolog	nucleus|cytoplasm|cytosol|plasma membrane|extracellular vesicular exosome|	activation of MAPKK activity|regulation of transcription from RNA polymerase II promoter|blood coagulation|insulin receptor signaling pathway|positive regulation of signal transduction|platelet activation|regulation of Rho GTPase activity|regulation of actin cytoskeleton organization|regulation of Rac protein signal transduction|Fc-gamma receptor signaling pathway involved in phagocytosis|innate …	SH3/SH2 adaptor activity|protein binding|SH2 domain binding|protein phosphorylated amino acid binding|ephrin receptor binding|	10	-3.7	57.4	0.00288	0.00301	0.00169	-1.73	23.5	0.00255	-2.72	-1.11	-1.93 : 203892.4	-1.76 : 203889.1	-1.14 : 203893.5	-1.13 : 203890.2	-0.843 : 203897.9	-0.574 : 203896.8	-0.426 : 203898.10	-0.17 : 203894.6	0.221 : 203895.7	2.89 : 203891.3	12928	0	-1	NaN	NaN	NaN	NaN	0.286287	0	0	-4.44976	0	0
ENSMUSG00000005732	RANBP1		RANBP1	B	RAN binding protein 1	nucleus|nuclear envelope|cytoplasm|centrosome|	spindle organization|signal transduction|viral process|positive regulation of GTPase activity|positive regulation of mitotic centrosome separation|intracellular transport|regulation of catalytic activity|	GDP-dissociation inhibitor activity|GTPase activator activity|Ran GTPase binding|	10	-1.6	41.8	0.0172	0.00408	0.00639	-1.64	23.5	0.00255	-2.62	-1.13	-1.78 : 51150.2	-1.73 : 51154.6	-1.41 : 51153.5	-1.24 : 51149.1	-0.914 : 51152.4	-0.495 : 51156.8	-0.317 : 51151.3	-0.0492 : 51155.7	0.118 : 51157.9	0.87 : 51158.10	19385	0	0	NaN	NaN	1	0	0.378628	0	0	-2.8188	0	0
ENSMUSG00000059743	FDPS		FDPS	A	farnesyl diphosphate synthase	nucleus|cytoplasm|mitochondrion|cytosol|	cholesterol biosynthetic process|viral process|geranyl diphosphate biosynthetic process|small molecule metabolic process|farnesyl diphosphate biosynthetic process|	dimethylallyltranstransferase activity|geranyltranstransferase activity|poly(A) RNA binding|metal ion binding|	10	-0.9	6.34	0.299	1.05e-06	9.87e-07	-1.09	27	0.00258	-2.86	-0.67	-2.36 : 57646.10	-1.21 : 57641.5	-0.974 : 57639.3	-0.925 : 57637.1	-0.863 : 57643.7	-0.857 : 57645.9	-0.768 : 57638.2	-0.713 : 57640.4	-0.676 : 57642.6	-0.173 : 57644.8	110196	0	0	NaN	NaN	1	0	0.177713	0	0	-6.74365	0	0
ENSMUSG00000060938	RPL26		RPL26	C	ribosomal protein L26	cytosol|membrane|cytosolic large ribosomal subunit|extracellular vesicular exosome|	nuclear-transcribed mRNA catabolic process, nonsense-mediated decay|rRNA processing|translation|translation|translational initiation|translational elongation|translational termination|SRP-dependent cotranslational protein targeting to membrane|gene expression|viral process|RNA metabolic process|mRNA metabolic process|viral life cycle|viral transcription|ribosomal large subunit biogenesis|cellular…	RNA binding|structural constituent of ribosome|poly(A) RNA binding|	8	-6.4	134	1e-05	0.0678	0.034	-2.27	25.8	0.00265	-3.69	-1.57	-2.39 : 168904.7	-1.91 : 168902.5	-1.65 : 168898.1	-1.61 : 168906.9	-0.386 : 168905.8	0.0617 : 168907.10	0.312 : 168900.3	0.578 : 168901.4			19941	0	-1	1	NaN	NaN	NaN	0.299697	0	0	NaN	NaN	0
ENSMUSG00000052146	RPS10		RPS10	C	ribosomal protein S10	nucleolus|cytoplasm|cytosol|ribosome|membrane|cytosolic small ribosomal subunit|extracellular vesicular exosome|	nuclear-transcribed mRNA catabolic process, nonsense-mediated decay|translation|translation|translational initiation|translational elongation|translational termination|SRP-dependent cotranslational protein targeting to membrane|gene expression|viral process|RNA metabolic process|mRNA metabolic process|viral life cycle|viral transcription|cellular protein metabolic process|	protein binding|poly(A) RNA binding|	8	-6.9	135	1e-05	0.000197	9.23e-05	-1.74	25.6	0.00276	-2.74	-1.18	-1.94 : 111502.3	-1.61 : 111506.7	-1.44 : 111504.5	-1.06 : 111508.9	-0.755 : 111509.10	-0.619 : 111503.4	-0.479 : 111505.6	0.199 : 111507.8			67097	0	-1	NaN	NaN	NaN	NaN	0.442807	0	0	-6.08853	1	0
ENSMUSG00000048878	HEXIM1		HEXIM1	C	hexamethylene bis-acetamide inducible 1	nucleus|cytoplasm|	negative regulation of transcription from RNA polymerase II promoter|transcription, DNA-templated|heart development|negative regulation of cyclin-dependent protein serine/threonine kinase activity|negative regulation of transcription, DNA-templated|	cyclin-dependent protein serine/threonine kinase inhibitor activity|protein binding|snRNA binding|	10	-0.2	0.431	0.921	1.08e-06	2.45e-06	0.91	25.5	0.0028	0.55	1.61	0.228 : 180788.5	0.486 : 180784.1	0.554 : 180785.2	0.599 : 180792.9	0.609 : 180786.3	0.646 : 180793.10	0.828 : 180789.6	0.954 : 180787.4	1.01 : 180791.8	1.28 : 180790.7	192231	0	0	NaN	NaN	1	0	0.3754	0	0	-13.2392	1	0
ENSMUSG00000029062	CDK11B		CDK11A	B	cyclin-dependent kinase 11B	nucleus|cytoplasm|	regulation of cell growth|regulation of transcription, DNA-templated|protein phosphorylation|apoptotic process|mitotic nuclear division|cell proliferation|regulation of mRNA processing|regulation of cell cycle|	protein kinase activity|protein serine/threonine kinase activity|cyclin-dependent protein serine/threonine kinase activity|protein binding|ATP binding|poly(A) RNA binding|	10	-2.5	56.1	0.00345	0.000537	0.00311	-1.77	23.1	0.00284	-3.03	-1.03	-2.01 : 81507.4	-1.53 : 81513.10	-1.42 : 81504.1	-0.91 : 81508.5	-0.882 : 81512.9	-0.774 : 81506.3	-0.255 : 81509.6	-0.0747 : 81510.7	0.0469 : 81511.8	0.0505 : 81505.2	12537	0	-1	NaN	NaN	NaN	NaN	NaN	NaN	NaN	-6.28836	1	0
ENSMUSG00000061559	WDR61		WDR61	C	WD repeat domain 61	nucleus|cytoplasm|Cdc73/Paf1 complex|transcriptionally active chromatin|Ski complex|	transcription, DNA-templated|Wnt signaling pathway|positive regulation of transcription elongation from RNA polymerase II promoter|negative regulation of myeloid cell differentiation|positive regulation of transcription from RNA polymerase II promoter|positive regulation of histone H3-K4 methylation|histone H3-K4 trimethylation|positive regulation of histone H3-K79 methylation|	protein binding|	10	-2.7	91.3	3e-05	4.47e-05	0.00021	-1.22	25.4	0.00294	-1.85	-0.88	-1.43 : 139744.8	-1.3 : 139738.2	-1.17 : 139741.5	-1.11 : 139746.10	-1.04 : 139739.3	-0.771 : 139740.4	-0.448 : 139742.6	-0.331 : 139737.1	-0.232 : 139743.7	0.15 : 139745.9	66317	0	-1	1	NaN	NaN	NaN	0.441327	0	0	-3.22947	0	0
ENSMUSG00000020409	SLU7		SLU7	A	SLU7 splicing factor homolog (S. cerevisiae)	nucleus|spliceosomal complex|cytoplasm|membrane|nuclear speck|small nuclear ribonucleoprotein complex|intracellular membrane-bounded organelle|catalytic step 2 spliceosome|	RNA splicing, via transesterification reactions|alternative mRNA splicing, via spliceosome|mRNA 3'-splice site recognition|mRNA splicing, via spliceosome|intracellular protein transport|cellular response to heat|	second spliceosomal transesterification activity|protein binding|zinc ion binding|pre-mRNA 3'-splice site binding|	9	-3.2	61.5	0.00115	0.0672	0.0324	-3.44	26.4	0.00297	-6.93	-2.9	-3.53 : 103616.6	-2.09 : 103617.7	-0.0333 : 103619.9	0.302 : 103618.8	0.487 : 103620.10	0.59 : 103612.2	0.767 : 103611.1	1.09 : 103613.3	1.17 : 103615.5		193116	0	-1	NaN	NaN	NaN	NaN	0.498203	0	0	-9.52041	1	0
ENSMUSG00000027829	CCNL1		CCNL1	B	cyclin L1	nucleus|nuclear speck|	regulation of cyclin-dependent protein serine/threonine kinase activity|transcription, DNA-templated|regulation of transcription, DNA-templated|RNA processing|	protein kinase binding|	10	-3.5	74.1	0.00059	0.00268	0.00165	-2.28	23	0.00299	-3.74	-1.67	-2.43 : 194031.7	-2.3 : 194030.6	-1.16 : 194028.4	-0.923 : 194033.9	-0.894 : 194027.3	-0.56 : 194029.5	-0.431 : 194026.2	-0.168 : 194025.1	0.299 : 194034.10	0.373 : 194032.8	56706	0	-1	NaN	NaN	NaN	NaN	0.246153	0	0	0.0608999	0	0
ENSMUSG00000073018	GM1070			D	predicted gene 1070	cellular_component|	biological_process|	molecular_function|	10	0	0	0.955	0.363	0.705	2.84	22.9	0.00299	2.06	5	-0.823 : 65998.2	-0.546 : 66001.5	-0.229 : 66003.7	-0.0438 : 65997.1	0.0466 : 66004.8	0.175 : 66005.9	0.33 : 66000.4	0.579 : 65999.3	1.01 : 66006.10	2.98 : 66002.6	381785	0	0	NaN	NaN	1	0	NaN	NaN	NaN	NaN	NaN	0
ENSMUSG00000061613	U2AF1		U2AF1	D	U2 small nuclear RNA auxiliary factor 1	nucleus|nucleoplasm|spliceosomal complex|Cajal body|nuclear speck|catalytic step 2 spliceosome|	mRNA splicing, via spliceosome|mRNA splicing, via spliceosome|transcription from RNA polymerase II promoter|termination of RNA polymerase II transcription|mRNA processing|mRNA export from nucleus|RNA splicing|gene expression|mRNA 3'-end processing|	nucleotide binding|protein binding|poly(A) RNA binding|metal ion binding|RS domain binding|	9	-4.1	80.1	0.00066	0.442	0.843	-3.41	22.9	0.00299	-6	-2.44	-3.47 : 49294.2	-0.936 : 49297.5	-0.493 : 49302.10	-0.255 : 49295.3	-0.15 : 49296.4	0.138 : 49301.9	0.206 : 49299.7	0.243 : 49298.6	0.893 : 49300.8		108121	0	-1	1	NaN	NaN	NaN	NaN	NaN	NaN	-6.94683	1	0
ENSMUSG00000027404	SNRPB		SNRPB	A	small nuclear ribonucleoprotein polypeptides B and B1	nucleoplasm|spliceosomal complex|U7 snRNP|U1 snRNP|U4 snRNP|U12-type spliceosomal complex|cytosol|cytosol|small nuclear ribonucleoprotein complex|methylosome|SMN-Sm protein complex|extracellular vesicular exosome|catalytic step 2 spliceosome|histone pre-mRNA 3'end processing complex|	spliceosomal snRNP assembly|spliceosomal snRNP assembly|mRNA splicing, via spliceosome|mRNA splicing, via spliceosome|transcription from RNA polymerase II promoter|termination of RNA polymerase II transcription|histone mRNA metabolic process|RNA splicing|gene expression|RNA metabolic process|mRNA 3'-end processing|ncRNA metabolic process|	protein binding|poly(A) RNA binding|histone pre-mRNA DCP binding|	9	-6.4	136	1e-05	0.00926	0.00103	-2.81	26.3	0.00303	-4.98	-1.69	-3.0 : 315.5	-2.2 : 314.4	-1.28 : 313.3	-1.25 : 317.7	-0.659 : 320.10	-0.424 : 319.9	-0.393 : 312.2	0.686 : 316.6	0.768 : 311.1		20638	0	-1	NaN	NaN	NaN	NaN	0.32504	0	0	-15.1396	1	0
ENSMUSG00000028540	DPH2		DPH2	C	DPH2 homolog (S. cerevisiae)	cytoplasm|	peptidyl-diphthamide biosynthetic process from peptidyl-histidine|	None	10	-1.8	39	0.0203	3.41e-06	2.42e-05	-1.52	25.3	0.00308	-2.38	-0.77	-1.76 : 138926.9	-1.54 : 138927.10	-0.977 : 138920.3	-0.961 : 138919.2	-0.872 : 138924.7	-0.665 : 138923.6	-0.635 : 138922.5	-0.553 : 138921.4	-0.343 : 138925.8	-0.0948 : 138918.1	67728	0	0	NaN	NaN	1	0	0.270343	0	0	-3.80704	0	0
ENSMUSG00000029169	DHX15		DHX15	C	DEAH (Asp-Glu-Ala-His) box helicase 15	nucleus|U12-type spliceosomal complex|nucleolus|U2-type post-mRNA release spliceosomal complex|	ATP catabolic process|mRNA processing|RNA splicing|	RNA helicase activity|double-stranded RNA binding|protein binding|ATP binding|ATP-dependent helicase activity|poly(A) RNA binding|	9	-4.1	76.4	0.00018	5.66e-05	0.000566	-2.11	25.2	0.00315	-3.37	-1.18	-2.29 : 212962.8	-1.72 : 212956.2	-1.27 : 212963.9	-1.23 : 212964.10	-0.726 : 212960.6	-0.717 : 212955.1	-0.424 : 212958.4	-0.165 : 212957.3	0.0106 : 212961.7		13204	0	-1	NaN	NaN	NaN	NaN	0.293987	0	0	-7.90549	1	0
ENSMUSG00000044030	IRF2BP1		IRF2BP1	C	interferon regulatory factor 2 binding protein 1	nucleus|	transcription, DNA-templated|regulation of transcription, DNA-templated|	protein binding|ligase activity|metal ion binding|	10	-0.7	8.01	0.397	1.81e-06	3.9e-06	-0.87	25.1	0.0032	-1.47	-0.54	-1.04 : 54166.7	-0.988 : 54160.1	-0.954 : 54167.8	-0.789 : 54161.2	-0.753 : 54165.6	-0.72 : 54162.3	-0.669 : 54164.5	-0.547 : 54163.4	-0.465 : 54168.9	-0.182 : 54169.10	272359	0	0	NaN	NaN	1	0	0.356547	0	0	-8.60806	1	0
ENSMUSG00000057236	RBBP4		RBBP4	B	retinoblastoma binding protein 4	nuclear chromatin|nucleus|nucleoplasm|nucleoplasm|Sin3 complex|NuRD complex|NuRD complex|NURF complex|CAF-1 complex|ESC/E(Z) complex|protein complex|	G2/M transition of mitotic cell cycle|mitotic cell cycle|ATP catabolic process|DNA replication|nucleosome assembly|DNA replication-dependent nucleosome assembly|DNA replication-independent nucleosome assembly|chromatin remodeling|transcription, DNA-templated|regulation of transcription, DNA-templated|negative regulation of cell proliferation|chromatin assembly|centromere-specific nucleosome assem…	RNA polymerase II core promoter proximal region sequence-specific DNA binding|RNA polymerase II distal enhancer sequence-specific DNA binding|protein binding|DNA-dependent ATPase activity|nucleosomal DNA binding|histone binding|histone deacetylase binding|	10	-2.8	44.9	0.0152	0.031	0.0114	-2.67	22.8	0.0032	-4.4	-1.77	-2.81 : 153266.5	-2.21 : 153269.8	-1.84 : 153267.6	-0.916 : 153270.9	-0.857 : 153265.4	-0.469 : 153271.10	0.0489 : 153262.1	0.0929 : 153263.2	0.177 : 153268.7	0.598 : 153264.3	19646	0	0	NaN	NaN	1	0	0.31798	0	0	-0.350649	0	0
ENSMUSG00000001521	TULP3		TULP3	B	tubby like protein 3	extracellular region|nucleus|nucleus|nucleolus|cytoplasm|plasma membrane|plasma membrane|cilium|intraciliary transport particle A|primary cilium|ciliary base|	regulation of transcription, DNA-templated|G-protein coupled receptor signaling pathway|multicellular organismal development|regulation of G-protein coupled receptor protein signaling pathway|negative regulation of smoothened signaling pathway|	protein binding|phosphatidylinositol-4,5-bisphosphate binding|enzyme binding|protein complex binding|phosphatidylinositol binding|	10	0	0	0.942	8.79e-05	0.000521	-2.26	22.8	0.0032	-3.69	-1.62	-2.44 : 173152.1	-2.19 : 173155.4	-1.25 : 173161.10	-1.21 : 173154.3	-0.639 : 173157.6	-0.502 : 173153.2	-0.446 : 173158.7	-0.325 : 173160.9	-0.189 : 173159.8	0.183 : 173156.5	22158	0	0	NaN	1	1	0	0.503841	0	0	-6.00406	1	0
ENSMUSG00000035297	COPS4		COPS4	C	COP9 signalosome subunit 4	nucleus|synaptic vesicle|COP9 signalosome|cell junction|extracellular vesicular exosome|	protein deneddylation|cullin deneddylation|	protein binding|	9	-3.1	62.2	0.00138	0.00266	0.000897	-2.71	25	0.00331	-4.16	-0.93	-2.83 : 9414.9	-1.37 : 9406.1	-1.14 : 9410.5	-1.07 : 9407.2	-1.04 : 9408.3	-0.452 : 9409.4	-0.38 : 9411.6	0.125 : 9412.7	0.606 : 9413.8		26891	0	-1	1	NaN	NaN	NaN	0.417167	0	0	-2.94799	0	0
ENSMUSG00000012117	DHDDS		DHDDS	C	dehydrodolichyl diphosphate synthase	endoplasmic reticulum membrane|	dolichol-linked oligosaccharide biosynthetic process|dolichyl diphosphate biosynthetic process|protein N-linked glycosylation via asparagine|post-translational protein modification|cellular protein metabolic process|	protein binding|transferase activity, transferring alkyl or aryl (other than methyl) groups|	7	-4.4	99.7	1e-05	6.36e-05	0.000309	-2.55	25	0.00331	-4.26	-1.35	-2.66 : 204406.8	-1.76 : 204402.4	-1.53 : 204408.10	-0.988 : 204403.5	-0.938 : 204401.3	-0.277 : 204405.7	-0.252 : 204399.1				67422	0	-1	NaN	NaN	NaN	NaN	0.308201	0	0	-13.0475	1	0
ENSMUSG00000039244	E130309D02RIK		C7ORF26	A	RIKEN cDNA E130309D02 gene	cellular_component|	biological_process|	molecular_function|	10	0.3	2.86	0.49	4.62e-05	2.62e-05	-1.21	25.9	0.00333	-2.11	-0.72	-1.52 : 41354.10	-1.32 : 41350.6	-1.27 : 41353.9	-0.839 : 41351.7	-0.829 : 41347.3	-0.737 : 41346.2	-0.68 : 41348.4	-0.659 : 41345.1	-0.164 : 41352.8	0.226 : 41349.5	231868	0	0	NaN	NaN	1	0	0.458977	0	0	-0.682711	0	0
ENSMUSG00000027002	NCKAP1		NCKAP1	B	NCK-associated protein 1	cytosol|integral component of membrane|SCAR complex|lamellipodium membrane|extracellular vesicular exosome|	in utero embryonic development|somitogenesis|neural tube closure|apoptotic process|zygotic determination of anterior/posterior axis, embryo|central nervous system development|endoderm development|mesodermal cell migration|embryonic body morphogenesis|positive regulation of lamellipodium assembly|Rac protein signal transduction|lamellipodium assembly|establishment or maintenance of actin cytoskele…	protein binding|protein complex binding|Rac GTPase binding|	10	-2.9	67.5	0.00107	0.000312	0.000589	-1.4	22.7	0.00334	-2.36	-1.02	-1.56 : 176057.5	-1.52 : 176062.10	-1.39 : 176060.8	-1.38 : 176054.2	-0.701 : 176056.4	-0.668 : 176058.6	-0.572 : 176055.3	-0.316 : 176053.1	0.132 : 176059.7	0.138 : 176061.9	50884	0	-1	NaN	NaN	NaN	NaN	0.407827	0	0	-2.6409	0	0
ENSMUSG00000031381	PIGA		PIGA	B	phosphatidylinositol glycan anchor biosynthesis, class A	glycosylphosphatidylinositol-N-acetylglucosaminyltransferase (GPI-GnT) complex|endoplasmic reticulum membrane|endoplasmic reticulum membrane|membrane|integral component of membrane|	C-terminal protein lipidation|GPI anchor biosynthetic process|positive regulation of metabolic process|preassembly of GPI anchor in ER membrane|post-translational protein modification|cellular protein metabolic process|	protein binding|UDP-glycosyltransferase activity|phosphatidylinositol N-acetylglucosaminyltransferase activity|	10	-0.6	6.75	0.371	0.000702	0.0029	-2.37	22.7	0.00334	-3.67	-0.94	-2.55 : 205167.9	-1.49 : 205161.3	-1.32 : 205162.4	-1.15 : 205163.5	-1.05 : 205165.7	-0.808 : 205164.6	-0.329 : 205166.8	-0.0625 : 205168.10	-0.0522 : 205160.2	0.277 : 205159.1	18700	0	0	NaN	NaN	1	0	0.329163	0	0	-16.9419	1	0
ENSMUSG00000026563	TADA1		TADA1	B	transcriptional adaptor 1	nucleus|cytoplasm|focal adhesion|STAGA complex|	chromatin organization|transcription, DNA-templated|regulation of transcription, DNA-templated|histone H3 acetylation|	transcription coactivator activity|histone acetyltransferase activity|	10	-1.2	5.23	0.439	0.000575	0.00258	-1.53	22.7	0.00334	-2.48	-0.96	-1.74 : 172586.3	-1.57 : 172585.2	-1.19 : 172592.9	-1.1 : 172593.10	-1.05 : 172591.8	-0.58 : 172589.6	-0.383 : 172584.1	-0.172 : 172588.5	-0.0995 : 172587.4	0.598 : 172590.7	27878	0	0	NaN	NaN	1	0	0.539037	0	0	-1.70447	0	0
ENSMUSG00000097179	1700016D08RIK			D	RIKEN cDNA 1700016D08 gene	None	None	None	10	-0.4	4.72	0.61	0.714	0.542	-3.33	22.6	0.00345	-6	-2.43	-3.39 : 171326.1	-1.1 : 171329.4	-0.216 : 171332.7	-0.0216 : 171331.6	0.0397 : 171333.8	0.107 : 171334.9	0.122 : 171330.5	0.171 : 171327.2	0.181 : 171328.3	0.252 : 171335.10	78377	1	0	NaN	NaN	1	0	NaN	NaN	NaN	NaN	NaN	NaN
ENSMUSG00000096468	GM16405			D	predicted gene 16405	cellular_component|	biological_process|	molecular_function|	9	-5	91.6	0.00014	0.167	0.088	2.69	22.6	0.00345	1.51	5	-0.67 : 38801.1	-0.461 : 38806.6	-0.0644 : 38804.4	0.0397 : 38802.2	0.0465 : 38803.3	0.864 : 38810.10	0.981 : 38807.7	1.17 : 38805.5	2.89 : 38809.9		100040867	10	-1	NaN	NaN	NaN	NaN	NaN	NaN	NaN	NaN	NaN	NaN
ENSMUSG00000094714	GM16430			D	predicted gene 16430	cellular_component|	biological_process|	molecular_function|	9	-5	91.6	0.00014	0.167	0.088	2.69	22.6	0.00345	1.51	5	-0.67 : 40125.1	-0.461 : 40130.6	-0.0644 : 40128.4	0.0397 : 40126.2	0.0465 : 40127.3	0.864 : 40134.10	0.981 : 40131.7	1.17 : 40129.5	2.89 : 40133.9		100040894	10	-1	NaN	NaN	NaN	NaN	NaN	NaN	NaN	NaN	NaN	NaN
ENSMUSG00000038374	RBM8A		RBM8A	C	RNA binding motif protein 8A	nucleus|nucleus|nucleoplasm|cytoplasm|cytosol|nuclear speck|exon-exon junction complex|catalytic step 2 spliceosome|	nuclear-transcribed mRNA catabolic process, nonsense-mediated decay|nuclear-transcribed mRNA catabolic process, nonsense-mediated decay|regulation of alternative mRNA splicing, via spliceosome|mRNA splicing, via spliceosome|mRNA splicing, via spliceosome|transcription from RNA polymerase II promoter|termination of RNA polymerase II transcription|mRNA export from nucleus|regulation of translation|…	nucleotide binding|RNA binding|mRNA binding|protein binding|poly(A) RNA binding|	9	-6.4	172	1e-05	0.00124	0.000555	-1.68	24.7	0.00356	-2.69	-1.06	-1.8 : 77625.7	-1.74 : 77624.6	-1.2 : 77628.10	-0.938 : 77620.2	-0.938 : 77623.5	-0.708 : 77621.3	-0.425 : 77619.1	0.0224 : 77622.4	0.7 : 77627.9		60365	0	-1	NaN	NaN	NaN	NaN	NaN	NaN	NaN	-10.831	1	0
ENSMUSG00000031787	KATNB1		KATNB1	A	katanin p80 (WD repeat containing) subunit B 1	spindle pole|nucleus|cytoplasm|centrosome|microtubule|katanin complex|katanin complex|membrane|axon|growth cone|midbody|neuronal cell body|	ATP catabolic process|protein targeting|negative regulation of microtubule depolymerization|mitotic chromosome movement towards spindle pole|positive regulation of cell death|positive regulation of neuron projection development|positive regulation of microtubule depolymerization|microtubule severing|	microtubule binding|microtubule-severing ATPase activity|dynein binding|protein heterodimerization activity|	10	-1	3.68	0.421	0.000368	4.27e-05	-1.05	25.6	0.0036	-1.72	-0.74	-1.26 : 14405.10	-1.21 : 14404.9	-1.17 : 14403.8	-1.1 : 14402.7	-1.04 : 14398.3	-0.673 : 14396.1	-0.623 : 14399.4	-0.576 : 14401.6	0.0327 : 14397.2	0.755 : 14400.5	74187	0	0	NaN	NaN	1	0	0.44909	0	0	-0.063899	0	0
ENSMUSG00000024999	NOC3L		NOC3L	C	nucleolar complex associated 3 homolog (S. cerevisiae)	nucleolus|nuclear speck|	fat cell differentiation|	poly(A) RNA binding|	9	-2.8	78.3	0.00015	0.121	0.224	-2.99	24.6	0.00368	-6	-2.14	-3.02 : 213800.6	-1.13 : 213803.9	-0.43 : 213797.3	-0.275 : 213796.2	-0.242 : 213802.8	-0.14 : 213795.1	0.12 : 213799.5	0.244 : 213801.7	0.333 : 213798.4		57753	0	-1	NaN	NaN	NaN	NaN	0.478493	0	0	-1.78536	0	0
ENSMUSG00000018379	SRSF1		SRSF1	C	serine/arginine-rich splicing factor 1	nucleus|nucleoplasm|nucleoplasm|cytoplasm|nuclear speck|exon-exon junction complex|extracellular vesicular exosome|catalytic step 2 spliceosome|	mRNA 5'-splice site recognition|mRNA splicing, via spliceosome|mRNA splicing, via spliceosome|in utero embryonic development|transcription from RNA polymerase II promoter|termination of RNA polymerase II transcription|mRNA splice site selection|mRNA processing|mRNA export from nucleus|RNA splicing|gene expression|mRNA 3'-end processing|cardiac muscle contraction|	nucleotide binding|RNA binding|RNA binding|mRNA binding|protein binding|poly(A) RNA binding|RS domain binding|	7	-7	189	1e-05	0.0319	0.00394	-1.98	24.6	0.00368	-3.55	-1.47	-2.07 : 156301.1	-2.0 : 156305.5	-1.55 : 156308.8	-1.12 : 156304.4	-0.673 : 156306.6	0.259 : 156309.9	0.965 : 156310.10				110809	0	-1	1	NaN	NaN	NaN	0.310783	0	0	-3.69645	1	0
ENSMUSG00000022141	NIPBL		NIPBL	B	Nipped-B homolog (Drosophila)	nucleus|nucleoplasm|SMC loading complex|extracellular vesicular exosome|	negative regulation of transcription from RNA polymerase II promoter|mitotic cell cycle|metanephros development|heart morphogenesis|outflow tract morphogenesis|cellular response to DNA damage stimulus|mitotic sister chromatid cohesion|brain development|sensory perception of sound|stem cell maintenance|positive regulation of histone deacetylation|maintenance of mitotic sister chromatid cohesion|ce…	chromatin binding|protein binding|protein C-terminus binding|mediator complex binding|histone deacetylase binding|protein N-terminus binding|chromo shadow domain binding|	10	-1.5	0.614	0.833	0.000416	0.000716	1.08	22.5	0.0037	0.67	1.8	-0.47 : 40877.3	0.0402 : 40880.6	0.204 : 40881.7	0.473 : 40875.1	0.573 : 40876.2	0.658 : 40879.5	0.873 : 40884.10	1.04 : 40883.9	1.04 : 40878.4	1.45 : 40882.8	71175	0	0	NaN	NaN	1	0	0.526027	0	0	-9.61496	1	0
ENSMUSG00000030871	EARS2		EARS2	B	glutamyl-tRNA synthetase 2, mitochondrial	mitochondrion|mitochondrial matrix|	tRNA aminoacylation for protein translation|glutamyl-tRNA aminoacylation|gene expression|tRNA aminoacylation for mitochondrial protein translation|	tRNA binding|glutamate-tRNA ligase activity|ATP binding|glutamate-tRNA(Gln) ligase activity|	10	-3	71.5	0.00082	0.0254	0.000338	1.17	22.4	0.00375	0.62	2.09	-1.19 : 26300.5	-0.701 : 26298.3	-0.356 : 26301.6	0.59 : 26302.7	0.606 : 26304.9	0.652 : 26296.1	0.796 : 26297.2	1.03 : 26299.4	1.08 : 26305.10	1.52 : 26303.8	67417	0	-1	NaN	NaN	NaN	NaN	0.39384	0	0	-12.3295	0	0
ENSMUSG00000025261	HUWE1		HUWE1	B	HECT, UBA and WWE domain containing 1, E3 ubiquitin protein ligase	nucleus|nucleus|cytoplasm|membrane|extracellular vesicular exosome|	protein polyubiquitination|base-excision repair|protein monoubiquitination|histone ubiquitination|cell differentiation|protein ubiquitination involved in ubiquitin-dependent protein catabolic process|	DNA binding|ubiquitin-protein transferase activity|protein binding|ligase activity|poly(A) RNA binding|	10	-2.4	21	0.156	0.00156	0.00287	-2.97	22.4	0.00375	-4.61	-0.74	-3.1 : 1713.10	-1.19 : 1712.9	-1.18 : 1711.8	-1.09 : 1708.5	-0.894 : 1709.6	-0.827 : 1707.4	-0.148 : 1706.3	-0.0611 : 1710.7	-0.0477 : 1704.1	0.309 : 1705.2	59026	0	0	NaN	NaN	1	0	0.306953	0	0	-7.0498	1	0
ENSMUSG00000021013	TTC8		TTC8	B	tetratricopeptide repeat domain 8	cytoplasm|centrosome|cilium|photoreceptor connecting cilium|BBSome|ciliary basal body|ciliary membrane|	axon guidance|sensory perception of smell|protein transport|olfactory bulb development|regulation of protein localization|nonmotile primary cilium assembly|multicellular organism growth|cilium assembly|fat cell differentiation|establishment of anatomical structure orientation|sensory processing|camera-type eye photoreceptor cell differentiation|renal tubule development|	RNA polymerase II repressing transcription factor binding|protein binding|	10	-0.8	2.87	0.594	0.00772	0.018	-2.37	22.4	0.00375	-4.29	-1.72	-2.53 : 84243.10	-2.34 : 84242.9	-1.15 : 84239.6	-1.07 : 84236.3	-1.02 : 84234.1	-0.4 : 84241.8	-0.244 : 84235.2	-0.0108 : 84237.4	0.261 : 84238.5	0.361 : 84240.7	76260	0	0	NaN	1	1	0	0.743688	1	0	2.28128	0	0
ENSMUSG00000036202	RIF1		RIF1	A	replication timing regulatory factor 1	chromosome, telomeric region|female pronucleus|male pronucleus|nucleus|nucleolus|cytoplasm|spindle|plasma membrane|	cellular response to DNA damage stimulus|cell cycle|stem cell maintenance|	None	10	-1.9	14.1	0.184	2.12e-06	7.26e-06	-2.09	25.3	0.00381	-3.17	-0.84	-2.38 : 210750.6	-1.67 : 210746.2	-1.03 : 210753.9	-0.941 : 210752.8	-0.909 : 210745.1	-0.811 : 210754.10	-0.615 : 210747.3	-0.36 : 210748.4	-0.355 : 210749.5	-0.275 : 210751.7	51869	0	0	NaN	NaN	1	0	NaN	NaN	NaN	3.75396	0	0
ENSMUSG00000019659	CCDC12		CCDC12	A	coiled-coil domain containing 12	None	None	protein binding|	10	-3.4	68.6	0.00068	5.05e-05	2.94e-05	-0.87	25.2	0.00389	-1.56	-0.58	-1.15 : 43917.2	-1.07 : 43923.8	-0.972 : 43922.7	-0.872 : 43916.1	-0.857 : 43920.5	-0.849 : 43921.6	-0.799 : 43919.4	-0.634 : 43918.3	0.0037 : 43925.10	0.0589 : 43924.9	72654	0	-1	NaN	NaN	NaN	NaN	0.208888	0	0	-5.98809	1	0
ENSMUSG00000040459	ARGLU1		ARGLU1	B	arginine and glutamate rich 1	nucleus|mitochondrion|	transcription, DNA-templated|regulation of transcription, DNA-templated|	protein binding|	10	-1.4	14.5	0.217	0.00197	0.00411	1.23	22.3	0.00391	0.85	1.89	-2.85 : 51276.8	-0.0323 : 51270.2	0.124 : 51275.7	0.266 : 51277.9	0.574 : 51274.6	0.628 : 51269.1	0.993 : 51272.4	1.14 : 51273.5	1.37 : 51278.10	1.41 : 51271.3	234023	0	0	NaN	NaN	1	0	NaN	NaN	NaN	-2.1925	0	0
ENSMUSG00000041203	2310036O22RIK		C19ORF43	C	RIKEN cDNA 2310036O22 gene	cellular_component|	biological_process|	molecular_function|	10	-1.1	1.48	0.82	5.91e-05	3.85e-06	-0.81	24.4	0.00402	-1.44	-0.51	-1.08 : 74077.4	-0.903 : 74083.10	-0.87 : 74074.1	-0.772 : 74081.8	-0.736 : 74076.3	-0.708 : 74082.9	-0.654 : 74079.6	-0.6 : 74080.7	-0.466 : 74075.2	0.614 : 74078.5	68544	0	0	NaN	NaN	1	0	0.240557	0	0	0.88702	0	0
ENSMUSG00000031644	NEK1		NEK1	B	NIMA-related kinase 1	pericentriolar material|nucleus|cytoplasm|centrosome|	cellular response to DNA damage stimulus|mitotic nuclear division|response to ionizing radiation|peptidyl-tyrosine phosphorylation|cilium assembly|	protein kinase activity|protein serine/threonine kinase activity|protein tyrosine kinase activity|protein binding|ATP binding|metal ion binding|	10	-0.2	0.772	0.81	0.000954	0.0053	-1.9	22.2	0.0041	-3.2	-1.05	-2.12 : 53438.9	-1.66 : 53433.4	-1.3 : 53434.5	-1.09 : 53439.10	-0.944 : 53437.8	-0.378 : 53431.2	-0.328 : 53432.3	-0.153 : 53436.7	-0.0774 : 53430.1	0.51 : 53435.6	18004	0	0	NaN	1	1	0	0.763254	1	0	-3.58429	0	0
ENSMUSG00000008668	RPS18		RPS18	B	ribosomal protein S18	nucleus|cytosol|cytosol|ribosome|small ribosomal subunit|small ribosomal subunit|membrane|cytosolic small ribosomal subunit|extracellular vesicular exosome|	nuclear-transcribed mRNA catabolic process, nonsense-mediated decay|translation|translation|translation|translational initiation|translational elongation|translational termination|SRP-dependent cotranslational protein targeting to membrane|gene expression|viral process|RNA metabolic process|mRNA metabolic process|viral life cycle|viral transcription|ribosome biogenesis|cellular protein metabolic …	structural constituent of ribosome|protein binding|rRNA binding|poly(A) RNA binding|	4	-3.1	47.1	0.0122	0.000683	0.000874	-2.1	22.2	0.0041	-3.83	-1.37	-2.19 : 220617.2	-1.45 : 220624.9	-1.27 : 220618.3	-1.11 : 220616.1							20084	6	0	1	NaN	1	0	0.320323	0	0	-1.17456	0	0
ENSMUSG00000019845	TUBE1		TUBE1	B	tubulin, epsilon 1	pericentriolar material|microtubule|	GTP catabolic process|centrosome cycle|protein polymerization|	GTPase activity|structural constituent of cytoskeleton|GTP binding|	10	-1.6	22.2	0.123	0.17	0.0939	-1.95	22.2	0.0041	-3.52	-1.45	-2.05 : 134385.1	-2.0 : 134386.2	-1.67 : 134393.9	-1.4 : 134391.7	-0.271 : 134392.8	-0.244 : 134388.4	0.201 : 134394.10	0.213 : 134390.6	0.247 : 134389.5	1.88 : 134387.3	71924	0	0	NaN	1	1	0	0.496583	0	0	-6.38621	0	0
ENSMUSG00000040945	RCC2		RCC2	A	regulator of chromosome condensation 2	nucleolus|cytosol|microtubule|midbody|chromosome, centromeric core region|mitotic spindle midzone|	mitotic cell cycle|endosome organization|mitotic nuclear division|integrin-mediated signaling pathway|positive regulation of G2/M transition of mitotic cell cycle|regulation of cell migration|negative regulation of GTPase activity|focal adhesion assembly|negative regulation of focal adhesion assembly|positive regulation of attachment of spindle microtubules to kinetochore|chromosome passenger com…	protein binding|microtubule binding|poly(A) RNA binding|Rac GTPase binding|	10	0	0	0.889	6.69e-07	1.23e-07	-0.89	25	0.00412	-1.57	-0.53	-1.27 : 178045.2	-1.03 : 178051.8	-0.943 : 178049.6	-0.84 : 178053.10	-0.826 : 178046.3	-0.763 : 178048.5	-0.539 : 178044.1	-0.535 : 178052.9	-0.534 : 178050.7	-0.49 : 178047.4	108911	0	0	NaN	NaN	1	0	0.235324	0	0	-1.06476	0	0
ENSMUSG00000024442	0610009O20RIK		KIAA0141	C	RIKEN cDNA 0610009O20 gene	mitochondrion|mitochondrion|	extrinsic apoptotic signaling pathway via death domain receptors|regulation of cysteine-type endopeptidase activity involved in apoptotic process|	molecular_function|	10	0.1	0.253	0.941	2.96e-05	1.35e-05	-1.56	24.3	0.00419	-2.52	-0.81	-1.92 : 213664.10	-1.43 : 213658.4	-1.06 : 213662.8	-1.0 : 213657.3	-0.735 : 213659.5	-0.621 : 213660.6	-0.591 : 213661.7	-0.584 : 213656.2	-0.371 : 213663.9	0.251 : 213655.1	66839	0	0	NaN	NaN	1	0	0.29621	0	0	-2.31357	0	0
ENSMUSG00000024145	PIGF		PIGF	C	phosphatidylinositol glycan anchor biosynthesis, class F	endoplasmic reticulum membrane|endoplasmic reticulum membrane|integral component of membrane|	C-terminal protein lipidation|GPI anchor biosynthetic process|preassembly of GPI anchor in ER membrane|post-translational protein modification|cellular protein metabolic process|	ethanolaminephosphotransferase activity|	10	-0.1	0.455	0.918	5.45e-05	0.00108	-1.38	24.3	0.00419	-2.38	-0.86	-1.75 : 76118.6	-1.33 : 76116.4	-1.15 : 76120.8	-1.09 : 76122.10	-1.04 : 76115.3	-0.778 : 76113.1	-0.433 : 76117.5	-0.28 : 76114.2	-0.0392 : 76121.9	-0.00331 : 76119.7	18701	0	0	NaN	NaN	1	0	0.497076	0	0	-0.998456	0	0
ENSMUSG00000006200	RHOX6			D	reproductive homeobox 6	cellular_component|nucleus|	biological_process|	DNA binding|	10	-1.3	8.97	0.439	0.144	0.441	-3.33	22.2	0.00423	-6	-2.33	-3.39 : 116047.7	-0.855 : 116046.6	-0.421 : 116045.5	-0.346 : 116041.1	-0.266 : 116042.2	-0.107 : 116049.9	0.00188 : 116043.3	0.0221 : 116048.8	0.141 : 116050.10	0.641 : 116044.4	19202	0	0	NaN	NaN	1	0	NaN	NaN	NaN	0.708238	0	0
ENSMUSG00000027323	RAD51		RAD51	A	RAD51 recombinase	nuclear chromosome|condensed chromosome|condensed nuclear chromosome|lateral element|nucleus|nucleus|nucleoplasm|nucleolus|cytoplasm|mitochondrion|mitochondrial matrix|microtubule organizing center|PML body|perinuclear region of cytoplasm|	double-strand break repair via homologous recombination|double-strand break repair via homologous recombination|double-strand break repair via homologous recombination|DNA recombinase assembly|ATP catabolic process|ATP catabolic process|DNA unwinding involved in DNA replication|DNA repair|double-strand break repair|DNA recombination|mitotic recombination|cellular response to DNA damage stimulus|m…	damaged DNA binding|double-stranded DNA binding|single-stranded DNA binding|protein binding|ATP binding|protein C-terminus binding|identical protein binding|single-stranded DNA-dependent ATPase activity|DNA polymerase binding|	9	-5.4	116	1e-05	0.0113	0.0279	-2.31	24.9	0.00425	-4.22	-1.75	-2.52 : 56799.2	-2.19 : 56803.6	-2.12 : 56807.10	-1.62 : 56806.9	-0.559 : 56805.8	-0.126 : 56802.5	0.0469 : 56801.4	0.0968 : 56804.7	0.188 : 56800.3		19361	0	-1	NaN	NaN	NaN	NaN	0.39885	0	0	-3.58162	0	0
ENSMUSG00000007659	BCL2L1		BCL2L1	B	BCL2-like 1	nucleus|nucleolus|cytoplasm|mitochondrion|mitochondrial outer membrane|mitochondrial outer membrane|mitochondrial outer membrane|mitochondrial inner membrane|mitochondrial matrix|centrosome|cytosol|integral component of membrane|cell junction|synaptic vesicle membrane|nuclear membrane|Bcl-2 family protein complex|	cytokinesis|ovarian follicle development|in utero embryonic development|release of cytochrome c from mitochondria|endocytosis|apoptotic process|mitotic cell cycle checkpoint|germ cell development|spermatogenesis|cell proliferation|positive regulation of cell proliferation|male gonad development|intrinsic apoptotic signaling pathway in response to DNA damage|apoptotic mitochondrial changes|fertili…	protein binding|protein kinase binding|identical protein binding|protein homodimerization activity|protein heterodimerization activity|BH3 domain binding|	10	-0.9	25.4	0.0817	1.93e-05	0.000777	-1.34	22.1	0.00426	-2.3	-0.74	-1.69 : 136345.8	-1.28 : 136339.2	-1.06 : 136338.1	-0.971 : 136341.4	-0.841 : 136343.6	-0.748 : 136344.7	-0.355 : 136342.5	-0.298 : 136340.3	-0.173 : 136347.10	-0.0848 : 136346.9	12048	0	0	NaN	NaN	1	0	0.233543	0	0	-8.68464	1	1
ENSMUSG00000062078	QK		QKI	B	quaking	nucleus|cytoplasm|	vasculogenesis|mRNA processing|regulation of translation|transport|multicellular organismal development|spermatid development|axon ensheathment|RNA splicing|positive regulation of gene expression|cell differentiation|myelination|muscle cell differentiation|long-chain fatty acid biosynthetic process|mRNA transport|3'-UTR-mediated mRNA destabilization|	RNA binding|mRNA binding|SH3 domain binding|poly(A) RNA binding|	10	-0.2	0.144	0.912	0.000103	0.000241	-0.93	22.1	0.00426	-1.61	-0.56	-1.16 : 114210.8	-1.08 : 114208.6	-0.927 : 114209.7	-0.833 : 114206.4	-0.829 : 114203.1	-0.642 : 114212.10	-0.517 : 114204.2	-0.284 : 114205.3	-0.235 : 114211.9	0.26 : 114207.5	19317	0	0	NaN	NaN	1	0	0.444737	0	0	-2.88938	0	0
ENSMUSG00000035585	TSEN34		TSEN34	C	TSEN34 tRNA splicing endonuclease subunit	tRNA-intron endonuclease complex|nucleolus|	tRNA-type intron splice site recognition and cleavage|mRNA processing|RNA phosphodiester bond hydrolysis, endonucleolytic|	tRNA-intron endonuclease activity|nucleic acid binding|lyase activity|	9	-5.8	31.1	0.0456	0.0045	0.00251	-2.51	24.2	0.00436	-3.96	-1.14	-2.65 : 3214.1	-1.59 : 3222.9	-1.52 : 3217.4	-1.18 : 3218.5	-1.03 : 3216.3	-0.604 : 3219.6	-0.297 : 3221.8	0.248 : 3220.7	0.73 : 3223.10		66078	0	0	NaN	NaN	1	0	0.278737	0	0	-3.47286	1	0
ENSMUSG00000025153	FASN		FASN	B	fatty acid synthase	cytoplasm|mitochondrion|Golgi apparatus|cytosol|plasma membrane|membrane|melanosome|glycogen granule|extracellular vesicular exosome|	osteoblast differentiation|acetyl-CoA metabolic process|energy reserve metabolic process|fatty acid metabolic process|fatty acid biosynthetic process|vitamin metabolic process|water-soluble vitamin metabolic process|pantothenate metabolic process|triglyceride biosynthetic process|positive regulation of cellular metabolic process|long-chain fatty-acyl-CoA biosynthetic process|cellular lipid metabo…	fatty acid synthase activity|[acyl-carrier-protein] S-acetyltransferase activity|[acyl-carrier-protein] S-malonyltransferase activity|3-oxoacyl-[acyl-carrier-protein] synthase activity|3-oxoacyl-[acyl-carrier-protein] reductase (NADPH) activity|3-hydroxypalmitoyl-[acyl-carrier-protein] dehydratase activity|enoyl-[acyl-carrier-protein] reductase (NADPH, B-specific) activity|oleoyl-[acyl-carrier-pr…	10	-1.2	33.6	0.0304	0.000133	0.000148	-0.88	22	0.00443	-1.55	-0.52	-1.1 : 103844.4	-0.961 : 103846.6	-0.947 : 103849.9	-0.896 : 103842.2	-0.664 : 103848.8	-0.651 : 103843.3	-0.567 : 103845.5	-0.412 : 103850.10	-0.111 : 103847.7	0.25 : 103841.1	14104	0	0	NaN	NaN	1	0	0.213083	0	0	-23.1083	1	0
ENSMUSG00000068039	TCP1		TCP1	B	t-complex 1	pericentriolar material|acrosomal vesicle|zona pellucida receptor complex|nuclear heterochromatin|Golgi apparatus|centrosome|cytosol|chaperonin-containing T-complex|microtubule|cell body|extracellular vesicular exosome|	protein folding|tubulin complex assembly|binding of sperm to zona pellucida|cellular protein metabolic process|'de novo' posttranslational protein folding|	protein binding|ATP binding|poly(A) RNA binding|unfolded protein binding|	10	-3.9	103	2e-05	0.000184	0.000192	-1.36	22	0.00443	-2.26	-0.77	-1.59 : 183635.1	-1.43 : 183642.8	-1.15 : 183638.4	-0.818 : 183639.5	-0.75 : 183643.9	-0.691 : 183640.6	-0.655 : 183641.7	-0.39 : 183636.2	-0.162 : 183644.10	1.44 : 183637.3	21454	0	-1	NaN	NaN	NaN	NaN	0.348423	0	0	-2.88718	0	0
ENSMUSG00000021615	XRCC4		XRCC4	A	X-ray repair complementing defective repair in Chinese hamster cells 4	nucleus|nucleus|nucleoplasm|centrosome|cytosol|DNA-dependent protein kinase-DNA ligase 4 complex|cell junction|DNA ligase IV complex|nonhomologous end joining complex|	in utero embryonic development|pro-B cell differentiation|DNA repair|double-strand break repair|double-strand break repair|double-strand break repair via nonhomologous end joining|double-strand break repair via nonhomologous end joining|double-strand break repair via nonhomologous end joining|double-strand break repair via nonhomologous end joining|central nervous system development|response to X…	protein binding|protein C-terminus binding|	10	-1.7	10.6	0.214	0.00153	0.000743	-1.94	24.7	0.00451	-3.33	-1.4	-2.1 : 172187.4	-2.09 : 172188.5	-1.7 : 172189.6	-1.3 : 172193.10	-0.856 : 172186.3	-0.397 : 172185.2	-0.366 : 172192.9	-0.32 : 172190.7	0.224 : 172191.8	0.398 : 172184.1	108138	0	0	NaN	NaN	1	0	0.513043	0	0	-10.2488	0	0
ENSMUSG00000078510	GM13101			D	novel protein similar to the preferentially expressed antigen in melanoma like (Pramel) family	cellular_component|	biological_process|	molecular_function|	10	0.3	0.585	0.876	0.347	0.414	2.97	22	0.00457	2.36	6	-0.543 : 42746.3	-0.388 : 42751.8	-0.355 : 42753.10	-0.108 : 42749.6	0.0778 : 42747.4	0.296 : 42748.5	0.342 : 42752.9	0.44 : 42745.2	0.639 : 42750.7	3.06 : 42744.1	626922	0	0	NaN	NaN	1	0	NaN	NaN	NaN	NaN	NaN	NaN
ENSMUSG00000021962	DCP1A		DCP1A	C	decapping mRNA 1A	cytoplasmic mRNA processing body|nucleus|cytosol|membrane|	nuclear-transcribed mRNA catabolic process, nonsense-mediated decay|nuclear-transcribed mRNA catabolic process, deadenylation-dependent decay|gene expression|RNA metabolic process|mRNA metabolic process|exonucleolytic nuclear-transcribed mRNA catabolic process involved in deadenylation-dependent decay|	protein binding|hydrolase activity|identical protein binding|	10	-0.9	27.8	0.0664	0.000128	0.00156	-1.97	24	0.00465	-3.05	-0.96	-2.17 : 156666.6	-1.42 : 156668.8	-1.26 : 156663.3	-1.16 : 156670.10	-1.15 : 156664.4	-0.887 : 156665.5	-0.269 : 156667.7	-0.204 : 156662.2	-0.154 : 156661.1	0.137 : 156669.9	75901	0	0	NaN	NaN	1	0	NaN	NaN	NaN	-5.81441	0	0
ENSMUSG00000019977	HBS1L		HBS1L	C	HBS1-like translational GTPase	membrane|extracellular vesicular exosome|	GTP catabolic process|translation|translational elongation|signal transduction|	translation elongation factor activity|GTPase activity|GTP binding|	10	-2.3	37.1	0.0246	0.0503	0.00553	-1.82	24	0.00465	-2.81	-1.35	-1.93 : 111864.5	-1.87 : 111866.7	-1.55 : 111862.3	-1.11 : 111868.9	-0.913 : 111869.10	-0.607 : 111860.1	0.124 : 111865.6	0.163 : 111867.8	0.186 : 111863.4	0.926 : 111861.2	56422	0	0	NaN	NaN	1	0	0.493803	0	0	-2.68406	0	0
ENSMUSG00000030733	SH2B1		SH2B1	C	SH2B adaptor protein 1	nucleus|cytosol|membrane|	cellular component movement|blood coagulation|lamellipodium assembly|intracellular signal transduction|positive regulation of mitosis|regulation of DNA biosynthetic process|	signal transducer activity|protein binding|	10	0.2	0.738	0.89	0.494	0.542	-3.02	23.9	0.00479	-6	-2.39	-3.04 : 206586.3	-1.33 : 206584.1	-0.331 : 206591.8	0.0323 : 206587.4	0.0464 : 206590.7	0.136 : 206593.10	0.329 : 206589.6	0.453 : 206585.2	0.503 : 206592.9	0.788 : 206588.5	20399	0	0	NaN	NaN	1	0	0.299773	0	0	0.722049	0	0
ENSMUSG00000028684	UROD		UROD	A	uroporphyrinogen decarboxylase	cytosol|	porphyrin-containing compound metabolic process|protoporphyrinogen IX biosynthetic process|heme biosynthetic process|heme biosynthetic process|small molecule metabolic process|	uroporphyrinogen decarboxylase activity|uroporphyrinogen decarboxylase activity|	10	-1.5	19.6	0.162	0.00014	4.72e-05	-2.08	24.3	0.00497	-3.29	-1.06	-2.36 : 69624.6	-1.87 : 69625.7	-1.2 : 69628.10	-0.991 : 69621.3	-0.772 : 69622.4	-0.709 : 69626.8	-0.568 : 69627.9	-0.551 : 69619.1	0.0935 : 69620.2	0.145 : 69623.5	22275	0	0	NaN	NaN	1	0	0.257287	0	0	-0.915233	0	0
ENSMUSG00000032288	IMP3		IMP3	C	IMP3, U3 small nucleolar ribonucleoprotein	nucleus|nucleolus|ribonucleoprotein complex|	rRNA processing|	protein binding|rRNA binding|poly(A) RNA binding|	10	-6.2	130	1e-05	0.0278	0.00243	-2.17	23.7	0.00506	-3.57	-1.33	-2.34 : 160477.1	-1.93 : 160485.9	-1.29 : 160484.8	-1.01 : 160480.4	-0.938 : 160481.5	-0.457 : 160483.7	-0.386 : 160479.3	0.199 : 160478.2	0.965 : 160486.10	1.13 : 160482.6	102462	0	-1	NaN	NaN	NaN	NaN	0.20671	0	0	-3.42787	0	0
ENSMUSG00000026662	SEPHS1		SEPHS1	A	selenophosphate synthetase 1	cytoplasm|cytoplasm|plasma membrane|plasma membrane|nuclear membrane|nuclear membrane|	cellular protein modification process|phosphorylation|	selenide, water dikinase activity|protein binding|ATP binding|GTP binding|protein homodimerization activity|protein heterodimerization activity|	10	-1.4	22.6	0.091	0.0157	0.0079	-1.49	24.2	0.00508	-2.58	-1.04	-1.8 : 23121.10	-1.51 : 23120.9	-1.41 : 23113.2	-1.31 : 23116.5	-0.96 : 23115.4	-0.321 : 23114.3	-0.316 : 23119.8	0.127 : 23117.6	0.262 : 23112.1	0.8 : 23118.7	109079	0	0	NaN	NaN	1	0	0.51812	0	0	-2.43193	0	0
ENSMUSG00000021287	XRCC3		XRCC3	B	X-ray repair complementing defective repair in Chinese hamster cells 3	nucleus|replication fork|cytoplasm|mitochondrion|Rad51C-XRCC3 complex|perinuclear region of cytoplasm|	double-strand break repair via homologous recombination|DNA catabolic process, endonucleolytic|ATP catabolic process|DNA repair|DNA recombination|cellular response to DNA damage stimulus|response to organic substance|regulation of centrosome duplication|resolution of mitotic recombination intermediates|positive regulation of mitotic cell cycle spindle assembly checkpoint|	four-way junction DNA binding|protein binding|ATP binding|DNA-dependent ATPase activity|crossover junction endodeoxyribonuclease activity|	8	-4	111	2e-05	0.0213	0.00584	-1.69	21.6	0.00515	-2.73	-1.06	-1.88 : 131863.5	-1.45 : 131864.6	-1.18 : 131859.1	-1.17 : 131861.3	-0.988 : 131865.7	-0.193 : 131867.9	0.342 : 131860.2	0.446 : 131862.4			74335	0	-1	NaN	NaN	NaN	NaN	0.53977	0	0	-2.47822	0	0
ENSMUSG00000027035	CERS6		CERS6	C	ceramide synthase 6	endoplasmic reticulum membrane|membrane|integral component of membrane|nuclear membrane|	regulation of transcription, DNA-templated|sphingolipid metabolic process|sphingolipid biosynthetic process|small molecule metabolic process|ceramide biosynthetic process|	sequence-specific DNA binding transcription factor activity|sequence-specific DNA binding|sphingosine N-acyltransferase activity|	10	0.4	4.91	0.553	0.00884	0.00596	-2.82	23.6	0.00526	-4.39	-0.63	-2.93 : 91311.9	-1.09 : 91312.10	-0.823 : 91310.8	-0.814 : 91304.2	-0.652 : 91309.7	-0.576 : 91306.4	-0.32 : 91308.6	0.0218 : 91305.3	0.337 : 91303.1	0.371 : 91307.5	241447	0	0	NaN	NaN	1	0	0.336073	0	0	NaN	NaN	0
ENSMUSG00000042557	SIN3A		SIN3A	C	SIN3 transcription regulator family member A	kinetochore|nucleus|nucleus|nucleoplasm|transcription factor complex|cytoplasm|Sin3 complex|Sin3 complex|transcriptional repressor complex|intercellular bridge|	negative regulation of transcription from RNA polymerase II promoter|in utero embryonic development|activation of innate immune response|positive regulation of defense response to virus by host|DNA replication|transcription, DNA-templated|protein deacetylation|aging|blood coagulation|response to organonitrogen compound|positive regulation of G2/M transition of mitotic cell cycle|positive regulati…	transcription regulatory region sequence-specific DNA binding|RNA polymerase II activating transcription factor binding|RNA polymerase II repressing transcription factor binding|RNA polymerase II transcription corepressor activity|chromatin binding|sequence-specific DNA binding transcription factor activity|transcription corepressor activity|protein binding|protein complex binding|protein deacety…	10	-1.4	15.7	0.206	0.00013	0.000627	-1.51	23.6	0.00526	-2.47	-1.07	-1.64 : 60100.6	-1.55 : 60098.4	-1.54 : 60103.9	-1.17 : 60102.8	-0.722 : 60104.10	-0.536 : 60097.3	-0.488 : 60101.7	-0.313 : 60099.5	-0.168 : 60096.2	0.299 : 60095.1	20466	0	0	NaN	NaN	1	0	0.479119	0	0	-10.9293	1	0
ENSMUSG00000027803	WWTR1		WWTR1	C	WW domain containing transcription regulator 1	nucleus|nucleus|nucleoplasm|transcription factor complex|cytoplasm|cytosol|	negative regulation of transcription from RNA polymerase II promoter|osteoblast differentiation|negative regulation of protein phosphorylation|transcription, DNA-templated|regulation of transcription, DNA-templated|transcription initiation from RNA polymerase II promoter|negative regulation of protein kinase activity|transforming growth factor beta receptor signaling pathway|positive regulation o…	transcription coactivator activity|transcription coactivator activity|transcription corepressor activity|protein binding|protein homodimerization activity|	10	-1	15.1	0.215	1.61e-05	7.57e-06	-1.59	23.6	0.00526	-2.57	-0.94	-1.94 : 134906.2	-1.47 : 134913.9	-1.34 : 134907.3	-0.906 : 134910.6	-0.76 : 134908.4	-0.687 : 134909.5	-0.538 : 134914.10	-0.424 : 134911.7	-0.406 : 134912.8	0.113 : 134905.1	97064	0	0	NaN	NaN	1	0	0.28743	0	0	-6.72734	1	0
ENSMUSG00000059474	MBTD1		MBTD1	A	mbt domain containing 1	nucleus|	transcription, DNA-templated|regulation of transcription, DNA-templated|chromatin modification|embryonic skeletal system development|	zinc ion binding|	10	-1.9	37.8	0.016	0.0251	0.0238	-1.57	23.9	0.00549	-2.69	-1.11	-1.77 : 219977.2	-1.7 : 219979.4	-1.46 : 219985.10	-0.936 : 219982.7	-0.868 : 219980.5	-0.232 : 219984.9	-0.215 : 219983.8	0.016 : 219978.3	0.384 : 219976.1	1.34 : 219981.6	103537	0	0	NaN	NaN	1	0	NaN	NaN	NaN	-2.91577	0	0
ENSMUSG00000015776	MED22		MED22	A	mediator complex subunit 22	cytoplasm|mediator complex|	regulation of transcription from RNA polymerase II promoter|transcription from RNA polymerase II promoter|	RNA polymerase II transcription cofactor activity|protein binding|	9	-4.4	80.6	0.00018	0.00255	0.0071	-2.01	23.9	0.00549	-3.5	-1.45	-2.25 : 92157.5	-2.04 : 92161.9	-1.66 : 92158.6	-0.943 : 92156.4	-0.899 : 92159.7	-0.437 : 92162.10	-0.149 : 92153.1	0.0923 : 92160.8	0.271 : 92154.2		20933	0	-1	NaN	NaN	NaN	NaN	0.491353	0	0	-2.98268	0	0
ENSMUSG00000018362	KPNA2		KPNA2	B	karyopherin alpha 2 (RAG cohort 1, importin alpha 1)	nucleus|nucleoplasm|cytoplasm|cytosol|membrane|	regulation of DNA recombination|mitotic G2 phase|DNA metabolic process|NLS-bearing protein import into nucleus|viral process|cytokine-mediated signaling pathway|	protein binding|nuclear localization sequence binding|protein transporter activity|histone deacetylase binding|poly(A) RNA binding|	10	-3.5	57.1	0.00301	0.883	0.856	-3.24	21.4	0.00552	-6	-2.67	-3.28 : 13566.1	-1.42 : 13572.7	-0.255 : 13567.2	-0.012 : 13574.9	-0.00244 : 13575.10	0.00775 : 13570.5	0.133 : 13573.8	0.164 : 13569.4	0.22 : 13568.3	0.97 : 13571.6	16647	3	-1	NaN	NaN	NaN	NaN	0.28224	0	0	-4.58841	1	0
ENSMUSG00000027968	LARP7		LARP7	B	La ribonucleoprotein domain family, member 7	nucleus|nucleoplasm|cytoplasm|Golgi apparatus|ribonucleoprotein complex|	RNA processing|	nucleotide binding|protein binding|poly(A) RNA binding|	10	0.4	4.28	0.495	0.000639	0.00109	0.84	21.3	0.00579	0.47	1.55	-0.403 : 115592.10	-0.06 : 115590.8	0.242 : 115583.1	0.422 : 115588.6	0.633 : 115589.7	0.695 : 115591.9	0.733 : 115587.5	0.79 : 115586.4	0.969 : 115585.3	1.16 : 115584.2	28036	0	0	NaN	NaN	1	0	0.317826	0	0	-0.880877	0	0
ENSMUSG00000014498	ANKRD52		ANKRD52	A	ankyrin repeat domain 52	None	None	protein binding|	10	-1.5	25.2	0.0618	4.4e-05	3.54e-05	-0.98	23.5	0.00604	-1.68	-0.64	-1.23 : 77539.1	-1.21 : 77548.10	-1.02 : 77542.4	-1.0 : 77543.5	-0.903 : 77545.7	-0.635 : 77547.9	-0.617 : 77544.6	-0.615 : 77546.8	-0.15 : 77540.2	0.16 : 77541.3	237615	0	0	NaN	NaN	1	0	NaN	NaN	NaN	-2.40597	0	0
ENSMUSG00000021466	PTCH1		PTCH1	B	patched 1	Golgi apparatus|plasma membrane|caveola|postsynaptic density|integral component of membrane|midbody|intracellular membrane-bounded organelle|dendritic growth cone|axonal growth cone|perinuclear region of cytoplasm|primary cilium|	negative regulation of transcription from RNA polymerase II promoter|branching involved in ureteric bud morphogenesis|neural tube closure|heart morphogenesis|smoothened signaling pathway|smoothened signaling pathway|regulation of mitotic cell cycle|brain development|epidermis development|regulation of smoothened signaling pathway|response to mechanical stimulus|organ morphogenesis|dorsal/ventral …	patched binding|smoothened binding|protein binding|hedgehog receptor activity|heparin binding|cholesterol binding|cyclin binding|protein complex binding|hedgehog family protein binding|	10	0	0	0.942	0.000791	0.00129	0.91	21.1	0.00624	0.55	2.07	-0.234 : 110912.3	-0.2 : 110919.10	0.217 : 110915.6	0.397 : 110917.8	0.669 : 110914.5	0.736 : 110918.9	0.797 : 110911.2	0.916 : 110913.4	0.95 : 110910.1	1.54 : 110916.7	19206	0	0	NaN	1	1	0	0.537602	0	0	-3.68337	0	0
ENSMUSG00000047459	DYNLRB1		DYNLRB1	C	dynein, light chain, roadblock-type 1	cytoplasm|centrosome|cytoplasmic dynein complex|cytoplasmic dynein complex|microtubule|membrane|	transport|microtubule-based movement|visual behavior|metabolic process|metabolic process|	microtubule motor activity|identical protein binding|	9	-4.9	83.5	8e-05	0.00039	0.000576	-1.52	23.1	0.00627	-2.56	-0.97	-1.8 : 108381.10	-1.43 : 108379.8	-1.26 : 108373.2	-1.14 : 108377.6	-0.975 : 108374.3	-0.479 : 108380.9	-0.341 : 108376.5	-0.241 : 108375.4	0.486 : 108378.7		67068	0	-1	NaN	NaN	NaN	NaN	0.32517	0	0	-1.78648	0	0
ENSMUSG00000018923	MED11		MED11	C	mediator complex subunit 11	mediator complex|	regulation of transcription from RNA polymerase II promoter|transcription from RNA polymerase II promoter|	RNA polymerase II transcription cofactor activity|protein binding|	10	-4	70.9	0.00046	0.734	0.28	-2.85	23.1	0.00627	-4.88	-2.13	-2.91 : 36029.3	-2.21 : 36032.6	-1.09 : 36034.8	-0.457 : 36033.7	-0.194 : 36027.1	0.265 : 36031.5	0.338 : 36035.9	0.355 : 36030.4	0.374 : 36028.2	0.443 : 36036.10	66172	0	-1	NaN	NaN	NaN	NaN	0.5458	0	0	-0.347735	0	0
ENSMUSG00000036442	THAP11		THAP11	C	THAP domain containing 11	nucleus|cytoplasm|intercellular bridge|	transcription, DNA-templated|regulation of transcription, DNA-templated|	DNA binding|protein binding|zinc ion binding|	10	-1.6	54.5	0.00394	0.00937	0.00153	-1.96	23	0.00643	-3.33	-1.33	-2.05 : 168205.4	-2.03 : 168203.2	-1.49 : 168202.1	-1.1 : 168204.3	-0.74 : 168208.7	-0.473 : 168207.6	-0.434 : 168209.8	-0.0275 : 168206.5	0.586 : 168210.9	0.777 : 168211.10	59016	0	0	NaN	NaN	1	0	NaN	NaN	NaN	-4.9569	0	0
ENSMUSG00000019505	UBB		UBB	B	ubiquitin B	nucleoplasm|cytosol|plasma membrane|endosome membrane|endocytic vesicle membrane|	G1/S transition of mitotic cell cycle|G2/M transition of mitotic cell cycle|negative regulation of transcription from RNA polymerase II promoter|activation of MAPK activity|protein polyubiquitination|mitotic cell cycle|toll-like receptor signaling pathway|antigen processing and presentation of peptide antigen via MHC class I|antigen processing and presentation of exogenous peptide antigen via MHC…	protein binding|	9	-6	76.8	0.00039	0.0199	0.0139	-2.92	21	0.00658	-5.29	-2.23	-3.02 : 220835.2	-2.64 : 220842.9	-1.11 : 220834.1	-0.923 : 220837.4	-0.787 : 220838.5	-0.0994 : 220841.8	0.0556 : 220843.10	0.102 : 220839.6	0.282 : 220836.3		22187	0	-1	NaN	NaN	NaN	NaN	0.29942	0	0	-4.88528	0	0
ENSMUSG00000078941	TAF9	AK6	TAF9	A	TAF9 RNA polymerase II, TATA box binding protein (TBP)-associated factor, 32kDa	PCAF complex|nucleoplasm|transcription factor TFIID complex|STAGA complex|transcription factor TFTC complex|pre-snoRNP complex|MLL1 complex|	chromatin organization|transcription from RNA polymerase II promoter|transcription initiation from RNA polymerase II promoter|transcription elongation from RNA polymerase II promoter|cellular response to DNA damage stimulus|gene expression|viral process|positive regulation of cell growth|negative regulation of proteasomal ubiquitin-dependent protein catabolic process|negative regulation of apopto…	p53 binding|DNA binding|transcription coactivator activity|transcription coactivator activity|histone acetyltransferase activity|protein binding|activating transcription factor binding|transcription regulatory region DNA binding|protein heterodimerization activity|C2H2 zinc finger domain binding|	10	-2.1	57	0.00184	0.00426	0.00112	-1.63	23.2	0.00674	-2.58	-0.97	-1.96 : 192887.4	-1.47 : 192884.1	-1.3 : 192893.10	-1.3 : 192890.7	-0.985 : 192892.9	-0.618 : 192886.3	-0.49 : 192888.5	-0.257 : 192891.8	0.99 : 192889.6	1.15 : 192885.2	108143	0	0	NaN	NaN	1	0	NaN	NaN	NaN	NaN	NaN	0
ENSMUSG00000063273	NAA15		NAA15	C	N(alpha)-acetyltransferase 15, NatA auxiliary subunit	nucleus|transcription factor complex|cytoplasm|membrane|NatA complex|	angiogenesis|transcription, DNA-templated|N-terminal protein amino acid acetylation|cell differentiation|negative regulation of apoptotic process|positive regulation of transcription, DNA-templated|protein stabilization|	protein binding|N-acetyltransferase activity|acetyltransferase activity|ribosome binding|ribosome binding|poly(A) RNA binding|	9	-4.1	69.5	0.00052	0.00357	0.00062	-2.44	22.8	0.00682	-3.82	-0.99	-2.59 : 71532.1	-1.34 : 71540.9	-1.34 : 71534.3	-1.22 : 71536.5	-1.18 : 71537.6	-0.477 : 71541.10	-0.411 : 71538.7	0.234 : 71533.2	0.588 : 71539.8		74838	0	-1	NaN	NaN	NaN	NaN	0.431	0	0	-0.129189	0	0
ENSMUSG00000035472	SLC25A21		SLC25A21	C	solute carrier family 25 (mitochondrial oxoadipate carrier), member 21	mitochondrial inner membrane|integral component of membrane|	lysine catabolic process|cellular nitrogen compound metabolic process|small molecule metabolic process|transmembrane transport|	None	10	0.6	5.68	0.507	0.000508	0.000468	-1.21	22.8	0.00682	-2.12	-0.74	-1.51 : 33769.10	-1.26 : 33765.6	-1.09 : 33761.2	-1.04 : 33767.8	-0.848 : 33766.7	-0.704 : 33768.9	-0.626 : 33762.3	-0.277 : 33763.4	0.00391 : 33760.1	0.653 : 33764.5	217593	0	0	NaN	NaN	1	0	0.240527	0	0	-2.94352	0	0
ENSMUSG00000067150	XPO5		XPO5	C	exportin 5	nucleus|nucleoplasm|cytoplasm|cytosol|	protein export from nucleus|gene expression|gene silencing by RNA|	tRNA binding|RNA binding|protein binding|Ran GTPase binding|protein transporter activity|poly(A) RNA binding|	10	-2.2	59.4	0.00214	0.000554	0.00238	-1.89	22.8	0.00682	-3.18	-1.02	-2.09 : 88796.6	-1.74 : 88794.4	-1.11 : 88791.1	-1.07 : 88795.5	-0.96 : 88799.9	-0.685 : 88800.10	-0.161 : 88792.2	-0.144 : 88797.7	-0.139 : 88798.8	0.273 : 88793.3	72322	0	0	NaN	NaN	1	0	0.402147	0	0	-0.507775	0	0
ENSMUSG00000006273	ATP6V1B2		ATP6V1B2	B	ATPase, H+ transporting, lysosomal 56/58kDa, V1 subunit B2	lysosomal membrane|cytosol|cytosol|plasma membrane|microvillus|endomembrane system|integral component of membrane|proton-transporting V-type ATPase, V1 domain|melanosome|intracellular membrane-bounded organelle|extracellular vesicular exosome|	cellular iron ion homeostasis|insulin receptor signaling pathway|ATP hydrolysis coupled proton transport|proton transport|transferrin transport|ATP metabolic process|interaction with host|transmembrane transport|phagosome maturation|	ATP binding|hydrogen ion transmembrane transporter activity|proton-transporting ATPase activity, rotational mechanism|	10	-2.5	32.6	0.0339	0.136	0.195	-3.3	20.9	0.00692	-6	-2.76	-3.32 : 208869.9	-0.313 : 208868.8	-0.31 : 208861.1	-0.238 : 208864.4	-0.219 : 208863.3	-0.199 : 208866.6	-0.0362 : 208862.2	-0.0193 : 208870.10	0.127 : 208867.7	0.801 : 208865.5	11966	0	0	NaN	NaN	1	0	0.347093	0	0	-9.65817	1	0
ENSMUSG00000052031	TAGAP1		TAGAP	D	T cell activation GTPase activating protein 1	cellular_component|	biological_process|	molecular_function|	10	-0.2	0.279	0.908	0.116	0.106	-3.84	21.2	0.00708	-7	-3.18	-3.88 : 207327.6	-0.623 : 207331.10	-0.414 : 207330.9	-0.296 : 207323.2	-0.135 : 207325.4	-0.122 : 207326.5	-0.0918 : 207322.1	-0.0824 : 207324.3	0.0134 : 207328.7	1.07 : 207329.8	380608	0	0	NaN	NaN	1	0	0.34709	0	0	0.748841	0	NaN
ENSMUSG00000032531	AMOTL2		AMOTL2	C	angiomotin like 2	cytosol|tight junction|apical plasma membrane|cytoplasmic vesicle|recycling endosome|	Wnt signaling pathway|hippo signaling|	protein binding|identical protein binding|	10	1.6	36.7	0.0254	3.67e-06	3.6e-05	-1.34	22.7	0.00718	-2.15	-0.64	-1.54 : 198168.7	-1.43 : 198170.9	-1.02 : 198165.4	-0.754 : 198169.8	-0.753 : 198164.3	-0.643 : 198171.10	-0.627 : 198163.2	-0.585 : 198162.1	-0.213 : 198167.6	-0.188 : 198166.5	56332	0	0	NaN	NaN	1	0	0.33324	0	0	1.59489	0	0
ENSMUSG00000046714	FOXC2		FOXC2	C	forkhead box C2 (MFH-1, mesenchyme forkhead 1)	nucleus|	negative regulation of transcription from RNA polymerase II promoter|ossification|patterning of blood vessels|metanephros development|ureteric bud development|somitogenesis|lymphangiogenesis|blood vessel remodeling|transcription from RNA polymerase II promoter|transcription from RNA polymerase II promoter|Notch signaling pathway|mesoderm development|heart development|insulin receptor signaling pa…	RNA polymerase II core promoter proximal region sequence-specific DNA binding transcription factor activity involved in positive regulation of transcription|sequence-specific DNA binding transcription factor activity|RNA polymerase II distal enhancer sequence-specific DNA binding transcription factor activity|chromatin DNA binding|sequence-specific DNA binding|transcription regulatory region DNA …	10	0.7	12.2	0.269	0.000137	0.000336	-1.64	22.7	0.00718	-2.62	-1.06	-1.8 : 166880.9	-1.69 : 166873.2	-1.34 : 166872.1	-0.997 : 166881.10	-0.647 : 166874.3	-0.62 : 166879.8	-0.477 : 166876.5	-0.354 : 166877.6	-0.0297 : 166875.4	0.149 : 166878.7	14234	0	0	NaN	NaN	1	0	NaN	NaN	NaN	-3.97053	0	0
ENSMUSG00000021277	TRAF3		TRAF3	B	TNF receptor-associated factor 3	mitochondrion|endosome|cytosol|cytoplasmic side of plasma membrane|CD40 receptor complex|	regulation of cytokine production|toll-like receptor signaling pathway|toll-like receptor signaling pathway|MyD88-independent toll-like receptor signaling pathway|apoptotic process|signal transduction|Toll signaling pathway|protein ubiquitination|regulation of proteolysis|negative regulation of NF-kappaB transcription factor activity|negative regulation of type I interferon production|regulation …	ubiquitin-protein transferase activity|signal transducer activity|tumor necrosis factor receptor binding|protein binding|zinc ion binding|ligase activity|protein kinase binding|ubiquitin protein ligase binding|thioesterase binding|	10	1.9	110	2e-05	3.12e-06	1.75e-05	-0.78	20.8	0.00725	-1.48	-0.44	-1.17 : 165174.2	-0.852 : 165175.3	-0.803 : 165177.5	-0.774 : 165178.6	-0.714 : 165180.8	-0.614 : 165181.9	-0.498 : 165179.7	-0.462 : 165173.1	-0.348 : 165176.4	-0.226 : 165182.10	22031	0	0	NaN	NaN	1	0	0.40678	0	0	-8.22021	1	0
ENSMUSG00000063838	CDC42EP5	1700027J19RIK	CDC42EP5	C	CDC42 effector protein (Rho GTPase binding) 5	cytoplasm|cytoskeleton|plasma membrane|endomembrane system|membrane|	JNK cascade|Rho protein signal transduction|regulation of cell shape|positive regulation of actin filament polymerization|positive regulation of pseudopodium assembly|	GTP-Rho binding|	10	-0.5	3.8	0.63	0.816	0.893	3.47	22.6	0.00735	3.02	7	-0.548 : 40966.2	-0.345 : 40968.4	-0.34 : 40969.5	-0.146 : 40971.7	-0.0699 : 40974.10	0.0476 : 40970.6	0.158 : 40967.3	0.379 : 40973.9	0.921 : 40965.1	3.52 : 40972.8	58804	0	0	NaN	NaN	1	0	0.297266	0	0	-3.29757	0	0
ENSMUSG00000069727	GM5595	ZFP975	ZNF14	C	predicted gene 5595	cellular_component|	biological_process|	molecular_function|metal ion binding|	10	-1.3	10.6	0.309	0.419	0.4	-3.47	22.6	0.00735	-6	-2.84	-3.49 : 78991.2	-0.724 : 78999.10	-0.649 : 78996.7	-0.261 : 78993.4	-0.239 : 78998.9	0.0317 : 78997.8	0.153 : 78994.5	0.153 : 78990.1	0.306 : 78992.3	0.646 : 78995.6	434179	1	0	NaN	NaN	1	0	0.768583	1	0	-5.06711	0	0
ENSMUSG00000074247	DDA1		DDA1	A	DET1 and DDB1 associated 1	None	None	None	10	0.5	3.15	0.463	0.000679	0.00424	-1.8	22.9	0.00738	-3.2	-1.34	-2.04 : 152819.8	-1.86 : 152817.6	-1.84 : 152820.9	-0.909 : 152814.3	-0.798 : 152818.7	-0.689 : 152812.1	-0.209 : 152815.4	-0.205 : 152816.5	-0.0592 : 152813.2	0.296 : 152821.10	66498	0	0	NaN	NaN	1	0	0.266653	0	0	0.329245	0	0
ENSMUSG00000020950	FOXG1		FOXG1	A	forkhead box G1	nucleus|	positive regulation of neuroblast proliferation|transcription, DNA-templated|regulation of mitotic cell cycle|brain development|aging|dorsal/ventral pattern formation|axon midline choice point recognition|pyramidal neuron migration|inner ear morphogenesis|negative regulation of neuron differentiation|positive regulation of cell cycle|negative regulation of transcription, DNA-templated|neuron fate…	DNA binding|sequence-specific DNA binding transcription factor activity|protein binding|sequence-specific DNA binding|	10	-1.4	2.06	0.561	0.000141	0.000433	-1.63	22.9	0.00738	-2.56	-0.87	-1.96 : 153735.4	-1.46 : 153736.5	-1.27 : 153738.7	-1.02 : 153732.1	-0.857 : 153741.10	-0.767 : 153740.9	-0.595 : 153739.8	-0.356 : 153737.6	-0.136 : 153733.2	0.367 : 153734.3	15228	0	0	NaN	NaN	1	0	0.37993	0	0	1.91551	0	0
ENSMUSG00000073794	I0C0044D17RIK			D	RIKEN cDNA I0C0044D17 gene	cellular_component|	biological_process|	molecular_function|	10	-1.1	1.24	0.822	0.705	0.432	-3.26	21.1	0.00744	-6	-2.51	-3.3 : 194172.8	-0.322 : 194168.4	-0.214 : 194169.5	-0.214 : 194174.10	-0.154 : 194167.3	0.0358 : 194170.6	0.461 : 194171.7	0.479 : 194173.9	0.618 : 194165.1	0.719 : 194166.2	545660	0	0	NaN	NaN	1	0	NaN	NaN	NaN	NaN	NaN	0
ENSMUSG00000002944	CD36		CD36	B	CD36 molecule (thrombospondin receptor)	extracellular space|Golgi apparatus|plasma membrane|plasma membrane|integral component of plasma membrane|external side of plasma membrane|cell surface|cell surface|membrane|endocytic vesicle membrane|platelet alpha granule membrane|membrane raft|phagocytic vesicle|	negative regulation of transcription from RNA polymerase II promoter|positive regulation of cell-matrix adhesion|toll-like receptor signaling pathway|antigen processing and presentation of peptide antigen via MHC class I|antigen processing and presentation of exogenous peptide antigen via MHC class I, TAP-dependent|platelet degranulation|MyD88-dependent toll-like receptor signaling pathway|lipid …	low-density lipoprotein receptor activity|low-density lipoprotein receptor activity|high-density lipoprotein particle binding|lipid binding|low-density lipoprotein particle binding|transforming growth factor beta binding|thrombospondin receptor activity|lipoteichoic acid receptor activity|lipoprotein particle binding|	10	0.8	0.872	0.797	0.803	0.987	-3.99	20.7	0.00751	-7.97	-3.62	-4.0 : 10053.8	-0.445 : 10055.10	-0.152 : 10049.4	-0.114 : 10052.7	0.0284 : 10051.6	0.0603 : 10054.9	0.177 : 10046.1	0.222 : 10047.2	0.383 : 10050.5	0.496 : 10048.3	12491	0	0	NaN	NaN	1	0	0.213587	0	0	-4.86179	0	0
ENSMUSG00000045140	PIGW		PIGW	B	phosphatidylinositol glycan anchor biosynthesis, class W	endoplasmic reticulum membrane|integral component of membrane|	C-terminal protein lipidation|preassembly of GPI anchor in ER membrane|post-translational protein modification|cellular protein metabolic process|	transferase activity, transferring acyl groups|	10	-0.5	3.27	0.564	6.54e-05	9.74e-05	-2.05	20.7	0.00751	-3.2	-0.86	-2.26 : 67634.1	-1.51 : 67637.4	-1.27 : 67642.9	-0.935 : 67636.3	-0.933 : 67639.6	-0.458 : 67643.10	-0.335 : 67640.7	-0.328 : 67635.2	-0.269 : 67638.5	0.143 : 67641.8	70325	0	0	NaN	NaN	1	0	NaN	NaN	NaN	-2.00449	0	0
ENSMUSG00000024067	DPY30		DPY30	A	dpy-30 homolog (C. elegans)	nucleus|Golgi apparatus|trans-Golgi network|histone methyltransferase complex|Set1C/COMPASS complex|	transcription, DNA-templated|regulation of transcription, DNA-templated|endosomal transport|histone H3-K4 methylation|	protein binding|identical protein binding|protein homodimerization activity|	10	-1.3	25.4	0.0603	0.051	0.0299	-2.77	22.7	0.0078	-4.5	-1.39	-2.95 : 183528.4	-1.67 : 183529.5	-1.64 : 183530.6	-0.911 : 183533.9	-0.725 : 183527.3	-0.36 : 183525.1	0.0747 : 183531.7	0.0804 : 183526.2	0.395 : 183532.8	0.633 : 183534.10	66310	0	0	NaN	NaN	1	0	0.363463	0	0	1.80513	0	0
ENSMUSG00000027166	DNAJC24		DNAJC24	C	DnaJ (Hsp40) homolog, subfamily C, member 24	cytoplasm|cytoskeleton|	peptidyl-diphthamide biosynthetic process from peptidyl-histidine|positive regulation of ATPase activity|oxidation-reduction process|chaperone-mediated protein folding|	ATPase activator activity|ferrous iron binding|zinc ion binding|	10	-0.9	1.64	0.806	1.26e-05	5.56e-05	-1.07	22.4	0.00787	-1.76	-0.64	-1.39 : 189184.9	-1.15 : 189181.6	-0.971 : 189182.7	-0.889 : 189177.2	-0.752 : 189183.8	-0.626 : 189178.3	-0.592 : 189180.5	-0.51 : 189179.4	-0.246 : 189185.10	0.00659 : 189176.1	99349	0	0	NaN	NaN	1	0	0.697923	0	1	0.840294	0	0
ENSMUSG00000030036	MOGS		MOGS	C	mannosyl-oligosaccharide glucosidase	endoplasmic reticulum|endoplasmic reticulum membrane|membrane|integral component of membrane|extracellular vesicular exosome|	protein folding|protein N-linked glycosylation|oligosaccharide metabolic process|protein N-linked glycosylation via asparagine|post-translational protein modification|cellular protein metabolic process|	mannosyl-oligosaccharide glucosidase activity|glucosidase activity|	10	-0.2	0.322	0.934	4.72e-05	0.00183	-2.72	22.4	0.00787	-4.02	-0.68	-2.85 : 94842.10	-1.22 : 94834.2	-0.993 : 94839.7	-0.983 : 94838.6	-0.871 : 94840.8	-0.587 : 94835.3	-0.407 : 94836.4	-0.251 : 94833.1	-0.06 : 94841.9	-0.0586 : 94837.5	57377	0	0	NaN	NaN	1	0	0.189497	0	0	0.0568023	0	0
ENSMUSG00000030062	RPN1		RPN1	B	ribophorin I	endoplasmic reticulum membrane|endoplasmic reticulum membrane|rough endoplasmic reticulum|oligosaccharyltransferase complex|membrane|integral component of membrane|melanosome|	translation|cellular protein modification process|SRP-dependent cotranslational protein targeting to membrane|gene expression|protein N-linked glycosylation via asparagine|protein N-linked glycosylation via asparagine|post-translational protein modification|cellular protein metabolic process|	dolichyl-diphosphooligosaccharide-protein glycotransferase activity|protein binding|poly(A) RNA binding|	10	-3.9	89.9	8e-05	0.000147	5.47e-05	-1.17	20.4	0.00816	-1.84	-0.73	-1.33 : 128009.5	-1.32 : 128012.8	-1.18 : 128006.2	-0.792 : 128010.6	-0.672 : 128011.7	-0.613 : 128005.1	-0.507 : 128007.3	-0.32 : 128008.4	-0.297 : 128014.10	0.582 : 128013.9	103963	0	-1	NaN	NaN	NaN	NaN	0.226893	0	0	-5.99279	0	0
ENSMUSG00000016554	EIF3D		EIF3D	C	eukaryotic translation initiation factor 3, subunit D	cytosol|eukaryotic translation initiation factor 3 complex|membrane|eukaryotic 43S preinitiation complex|eukaryotic 48S preinitiation complex|	formation of translation preinitiation complex|formation of translation initiation complex|translation|translational initiation|translational initiation|translational initiation|regulation of translational initiation|gene expression|cellular protein metabolic process|	translation initiation factor activity|translation initiation factor activity|protein binding|poly(A) RNA binding|	10	-3.4	141	1e-05	1.17e-05	7.69e-05	-1.19	22.3	0.00817	-1.84	-0.79	-1.35 : 91664.2	-1.3 : 91668.6	-1.2 : 91666.4	-0.916 : 91671.9	-0.718 : 91663.1	-0.654 : 91667.5	-0.519 : 91669.7	-0.471 : 91670.8	-0.247 : 91665.3	-0.0123 : 91672.10	55944	0	-1	1	NaN	NaN	NaN	0.246333	0	0	-12.226	1	0
ENSMUSG00000016018	SKIV2L2		SKIV2L2	C	superkiller viralicidic activity 2-like 2 (S. cerevisiae)	exosome (RNase complex)|nucleus|nucleoplasm|nucleolus|catalytic step 2 spliceosome|	mRNA splicing, via spliceosome|maturation of 5.8S rRNA|	helicase activity|protein binding|ATP binding|poly(A) RNA binding|	10	-4	50.2	0.00639	0.0577	0.266	3.25	22.3	0.00817	2.4	6	-1.2 : 13595.10	-0.0732 : 13586.1	-0.0209 : 13589.4	0.0867 : 13592.7	0.14 : 13590.5	0.246 : 13591.6	0.323 : 13594.9	0.56 : 13587.2	0.605 : 13588.3	3.3 : 13593.8	72198	0	0	NaN	NaN	1	0	0.449187	0	0	1.653	0	0
ENSMUSG00000027569	MRGBP		MRGBP	C	MRG/MORF4L binding protein	nucleus|nucleoplasm|H4/H2A histone acetyltransferase complex|	chromatin organization|transcription, DNA-templated|regulation of transcription, DNA-templated|chromatin modification|regulation of growth|	None	10	-0.6	11.5	0.286	1e-06	4.56e-07	0.67	22.2	0.00845	0.38	1.24	0.371 : 216777.7	0.498 : 216780.10	0.5 : 216771.1	0.559 : 216774.4	0.599 : 216779.9	0.623 : 216772.2	0.625 : 216773.3	0.745 : 216778.8	0.801 : 216776.6	0.926 : 216775.5	73247	0	0	NaN	NaN	1	0	0.418217	0	0	NaN	NaN	0
ENSMUSG00000021870	SLMAP		SLMAP	C	sarcolemma associated protein	smooth endoplasmic reticulum|microtubule organizing center|integral component of plasma membrane|sarcolemma|	muscle contraction|	protein binding|	10	0.4	1.65	0.805	0.00415	0.000347	-1.11	22.1	0.00872	-2.79	-0.7	-2.1 : 193562.3	-1.12 : 193567.8	-1.01 : 193561.2	-0.987 : 193565.6	-0.965 : 193560.1	-0.902 : 193568.9	-0.705 : 193566.7	0.0351 : 193569.10	0.164 : 193563.4	0.884 : 193564.5	83997	0	0	NaN	NaN	1	0	0.405557	0	0	-8.78024	0	0
ENSMUSG00000060860	UBE2S		UBE2S	C	ubiquitin-conjugating enzyme E2S	anaphase-promoting complex|	cellular protein modification process|exit from mitosis|exit from mitosis|free ubiquitin chain polymerization|anaphase-promoting complex-dependent proteasomal ubiquitin-dependent protein catabolic process|protein K29-linked ubiquitination|protein K27-linked ubiquitination|activation of anaphase-promoting complex activity|protein K63-linked ubiquitination|protein K11-linked ubiquitination|protein …	ubiquitin-protein transferase activity|ubiquitin-protein transferase activity|ATP binding|acid-amino acid ligase activity|	10	-1.2	20.7	0.142	0.0106	0.00174	-1.25	22.1	0.00872	-1.88	-0.93	-1.36 : 101527.6	-1.33 : 101522.1	-1.29 : 101524.3	-1.18 : 101528.7	-1.02 : 101530.9	-0.616 : 101523.2	-0.417 : 101526.5	0.24 : 101531.10	0.27 : 101529.8	0.295 : 101525.4	77891	0	0	NaN	NaN	1	0	0.315052	0	0	-4.58775	0	0
ENSMUSG00000032905	ATG12		ATG12	B	autophagy related 12	pre-autophagosomal structure membrane|pre-autophagosomal structure membrane|Atg12-Atg5-Atg16 complex|	autophagic vacuole assembly|autophagic vacuole assembly|mitochondrion degradation|C-terminal protein lipidation|cellular response to nitrogen starvation|negative regulation of type I interferon production|nucleophagy|innate immune response|	protein binding|Atg8 ligase activity|	10	-2.1	12.4	0.24	0.178	0.142	1.93	20.1	0.00876	1.6	3.86	-1.45 : 129268.4	-1.03 : 129266.2	-0.73 : 129267.3	-0.697 : 129270.6	-0.358 : 129274.10	-0.0704 : 129273.9	-0.0131 : 129269.5	0.112 : 129271.7	1.96 : 129272.8	2.03 : 129265.1	67526	0	0	NaN	NaN	1	0	0.664757	0	1	-2.35685	0	0
ENSMUSG00000042901	AIDA		AIDA	A	axin interactor, dorsalization associated	cellular_component|cytoplasm|	dorsal/ventral pattern formation|regulation of protein homodimerization activity|negative regulation of JUN kinase activity|negative regulation of JNK cascade|	protein domain specific binding|	10	-2.5	1.78	0.587	9.74e-05	0.00173	-2.73	22.3	0.00878	-4.1	-0.81	-2.94 : 15434.1	-1.36 : 15440.7	-1.33 : 15439.6	-1.02 : 15443.10	-0.965 : 15438.5	-0.77 : 15436.3	-0.353 : 15441.8	-0.278 : 15437.4	-0.0788 : 15442.9	0.0731 : 15435.2	108909	0	0	NaN	NaN	1	0	0.471547	0	0	-1.02256	0	0
ENSMUSG00000022185	ACIN1		ACIN1	B	apoptotic chromatin condensation inducer 1	nucleus|cytoplasm|cytosol|plasma membrane|nuclear speck|exon-exon junction complex|ASAP complex|	ATP catabolic process|mRNA processing|apoptotic process|cellular component disassembly involved in execution phase of apoptosis|RNA splicing|erythrocyte differentiation|apoptotic chromosome condensation|positive regulation of apoptotic process|positive regulation of monocyte differentiation|negative regulation of mRNA splicing, via spliceosome|	nucleotide binding|nucleic acid binding|protein binding|ATPase activity|enzyme binding|poly(A) RNA binding|	10	0.1	0.007	0.941	5.68e-05	0.000249	-1.8	20	0.00887	-2.82	-0.56	-2.05 : 151231.8	-1.15 : 151232.9	-0.983 : 151228.5	-0.913 : 151230.7	-0.81 : 151225.2	-0.48 : 151229.6	-0.404 : 151227.4	-0.372 : 151226.3	-0.0878 : 151224.1	0.0121 : 151233.10	56215	0	0	NaN	NaN	1	0	0.197847	0	0	-14.2518	1	0
ENSMUSG00000027087	ITGAV		ITGAV	B	integrin, alpha V	plasma membrane|plasma membrane|integral component of plasma membrane|integrin complex|integrin complex|external side of plasma membrane|cell surface|cell surface|membrane|alphav-beta3 integrin-IGF-1-IGF1R complex|phagocytic vesicle|extracellular vesicular exosome|	angiogenesis|antigen processing and presentation of peptide antigen via MHC class I|antigen processing and presentation of exogenous peptide antigen via MHC class I, TAP-dependent|cell adhesion|cell-matrix adhesion|integrin-mediated signaling pathway|axon guidance|blood coagulation|positive regulation of cell proliferation|response to virus|negative regulation of macrophage derived foam cell diff…	virus receptor activity|opsonin binding|protein kinase C binding|voltage-gated calcium channel activity|protein binding|insulin-like growth factor I binding|metal ion binding|transforming growth factor beta binding|	10	-1.3	34.3	0.0284	0.00222	0.00114	-2.49	20	0.00887	-4.02	-1.15	-2.65 : 183940.6	-1.72 : 183935.1	-1.52 : 183939.5	-1.2 : 183942.8	-0.613 : 183936.2	-0.574 : 183943.9	-0.476 : 183941.7	0.0039 : 183937.3	0.162 : 183944.10	0.204 : 183938.4	16410	0	0	NaN	NaN	1	0	0.338853	0	0	-3.90615	0	0
ENSMUSG00000030779	RBBP6		RBBP6	B	retinoblastoma binding protein 6	nucleus|chromosome|cytoplasm|microtubule organizing center|	in utero embryonic development|multicellular organism growth|protein ubiquitination involved in ubiquitin-dependent protein catabolic process|embryonic organ development|somite development|	ubiquitin-protein transferase activity|protein binding|zinc ion binding|ligase activity|poly(A) RNA binding|	10	-4.2	113	1e-05	0.0417	0.0196	-2.14	20	0.00887	-3.43	-1.19	-2.32 : 182251.6	-1.53 : 182248.3	-1.46 : 182247.2	-1.43 : 182249.4	-1.03 : 182250.5	-0.352 : 182254.9	-0.241 : 182255.10	0.203 : 182253.8	0.846 : 182246.1	1.47 : 182252.7	19647	0	-1	NaN	NaN	NaN	NaN	0.45637	0	0	-9.03493	1	0
ENSMUSG00000027544	NFATC2		NFATC2	C	nuclear factor of activated T-cells, cytoplasmic, calcineurin-dependent 2	nucleus|nucleus|nucleoplasm|transcription factor complex|cytoplasm|cytoplasm|cytosol|plasma membrane|actin cytoskeleton|ribonucleoprotein complex|	cytokine production|transcription, DNA-templated|regulation of transcription, DNA-templated|cellular response to DNA damage stimulus|cell migration|positive regulation of B cell proliferation|Fc-epsilon receptor signaling pathway|response to drug|innate immune response|positive regulation of transcription, DNA-templated|positive regulation of transcription from RNA polymerase II promoter|B cell r…	DNA binding|sequence-specific DNA binding transcription factor activity|protein binding|sequence-specific DNA binding|transcription regulatory region DNA binding|	10	1.2	1.05	0.86	0.854	0.606	3.21	22	0.00904	2.71	6	-0.369 : 60415.1	-0.286 : 60416.2	-0.247 : 60424.10	-0.235 : 60419.5	-0.194 : 60421.7	-0.0679 : 60422.8	0.15 : 60423.9	0.204 : 60418.4	0.688 : 60420.6	3.25 : 60417.3	18019	0	0	NaN	NaN	1	0	0.348743	0	0	-5.90815	0	1
ENSMUSG00000022338	ENY2		ENY2	B	enhancer of yellow 2 homolog (Drosophila)	SAGA complex|nuclear pore|transcription export complex 2|DUBm complex|	chromatin organization|transcription elongation from RNA polymerase II promoter|mRNA export from nucleus|protein transport|histone deubiquitination|positive regulation of transcription, DNA-templated|	transcription coactivator activity|ligand-dependent nuclear receptor transcription coactivator activity|	6	-3.9	74.5	0.00055	7.99e-05	6.5e-05	-1.1	19.8	0.00906	-1.89	-0.68	-1.35 : 183087.6	-0.975 : 183085.4	-0.957 : 183083.2	-0.877 : 183088.7	-0.58 : 183084.3	-0.534 : 183082.1					223527	0	-1	NaN	NaN	NaN	NaN	0.43486	0	0	-0.700906	0	0
ENSMUSG00000085793	LIN52		LIN52	B	lin-52 DREAM MuvB core complex component	nucleoplasm|DRM complex|	G2/M transition of mitotic cell cycle|mitotic cell cycle|transcription, DNA-templated|regulation of cell cycle|	None	9	-4.7	58.3	0.0026	0.0218	0.00282	-2.25	19.8	0.00906	-3.48	-0.94	-2.42 : 198763.3	-1.52 : 198766.6	-1.15 : 198768.8	-1.15 : 198769.9	-0.868 : 198767.7	-0.569 : 198762.2	-0.00432 : 198765.5	0.479 : 198761.1	0.613 : 198764.4		217708	0	-1	NaN	NaN	NaN	NaN	NaN	NaN	NaN	-3.20261	0	0
ENSMUSG00000030695	ALDOA		ALDOA	B	aldolase A, fructose-bisphosphate	extracellular region|extracellular space|nucleus|cytosol|actin cytoskeleton|membrane|platelet alpha granule lumen|M band|I band|extracellular vesicular exosome|	platelet degranulation|carbohydrate metabolic process|fructose metabolic process|glucose metabolic process|gluconeogenesis|glycolytic process|glycolytic process|glycolytic process|ATP biosynthetic process|striated muscle contraction|actin filament organization|blood coagulation|regulation of cell shape|platelet activation|fructose 1,6-bisphosphate metabolic process|small molecule metabolic proces…	actin binding|fructose-bisphosphate aldolase activity|protein binding|cytoskeletal protein binding|tubulin binding|identical protein binding|poly(A) RNA binding|fructose binding|	7	-6.5	164	1e-05	0.000479	0.000548	-1.14	19.7	0.0092	-1.87	-0.68	-1.42 : 168147.6	-0.985 : 168150.9	-0.899 : 168143.2	-0.882 : 168151.10	-0.812 : 168142.1	-0.468 : 168148.7	0.102 : 168145.4				11674	0	-1	NaN	NaN	NaN	NaN	0.310907	0	0	-5.52986	0	0
ENSMUSG00000034088	HDLBP		HDLBP	B	high density lipoprotein binding protein	nucleus|cytoplasm|plasma membrane|high-density lipoprotein particle|	lipid transport|cholesterol metabolic process|	protein binding|lipid binding|poly(A) RNA binding|	10	-1	5.01	0.451	0.00522	0.000489	-0.86	19.6	0.00927	-1.54	-0.5	-0.998 : 129668.9	-0.997 : 129664.5	-0.958 : 129667.8	-0.809 : 129669.10	-0.66 : 129661.2	-0.643 : 129662.3	-0.604 : 129666.7	0.107 : 129660.1	0.147 : 129663.4	0.339 : 129665.6	110611	0	0	NaN	NaN	1	0	0.303637	0	0	-1.6016	0	0
ENSMUSG00000030265	KRAS		KRAS	B	Kirsten rat sarcoma viral oncogene homolog	mitochondrion|plasma membrane|membrane|membrane raft|	MAPK cascade|activation of MAPKK activity|positive regulation of protein phosphorylation|GTP catabolic process|epidermal growth factor receptor signaling pathway|small GTPase mediated signal transduction|Ras protein signal transduction|axon guidance|blood coagulation|positive regulation of cell proliferation|insulin receptor signaling pathway|visual learning|fibroblast growth factor receptor sign…	protein binding|GTP binding|GMP binding|GDP binding|LRR domain binding|protein complex binding|	10	-1.4	11.3	0.256	0.00232	0.00325	-1.02	19.6	0.00927	-1.72	-0.63	-1.19 : 98055.4	-1.14 : 98058.7	-1.06 : 98052.1	-0.825 : 98061.10	-0.776 : 98057.6	-0.75 : 98059.8	-0.207 : 98053.2	-0.0764 : 98054.3	-0.0465 : 98056.5	1.26 : 98060.9	16653	0	0	NaN	NaN	1	0	0.288566	0	0	-6.07612	1	0
ENSMUSG00000033554	DPH5		DPH5	B	diphthamide biosynthesis 5	cellular_component|	peptidyl-diphthamide biosynthetic process from peptidyl-histidine|peptidyl-diphthamide biosynthetic process from peptidyl-histidine|methylation|	diphthine synthase activity|	10	-1.9	34	0.0292	0.000428	0.000184	-1	19.5	0.00939	-3.45	-0.56	-2.59 : 119949.9	-1.03 : 119950.10	-0.902 : 119945.5	-0.893 : 119944.4	-0.783 : 119948.8	-0.709 : 119942.2	-0.434 : 119946.6	-0.392 : 119947.7	-0.05 : 119941.1	1.38 : 119943.3	69740	0	0	NaN	NaN	1	0	0.50368	0	0	-5.90689	0	0
ENSMUSG00000061607	MDC1		MDC1	A	mediator of DNA-damage checkpoint 1	nucleus|nucleoplasm|chromosome|focal adhesion|	double-strand break repair via homologous recombination|DNA repair|double-strand break repair|intra-S DNA damage checkpoint|	protein binding|protein C-terminus binding|FHA domain binding|	10	-0.9	9.18	0.235	0.000788	0.0071	-1.7	22.1	0.00939	-3.07	-1.08	-2.0 : 193161.2	-1.67 : 193162.3	-1.51 : 193164.5	-1.02 : 193160.1	-0.788 : 193165.6	-0.558 : 193169.10	-0.295 : 193167.8	-0.176 : 193163.4	-0.0116 : 193166.7	0.311 : 193168.9	240087	0	0	NaN	NaN	1	0	0.569807	0	0	-4.58038	0	0
ENSMUSG00000020328	NUDCD2		NUDCD2	A	NudC domain containing 2	condensed chromosome kinetochore|spindle pole|intracellular|cytoplasm|microtubule organizing center|microtubule cytoskeleton|extracellular vesicular exosome|	None	protein binding|	10	-0.8	6.76	0.286	6.88e-06	1.38e-05	-1.23	22.1	0.00939	-2.17	-0.66	-1.61 : 52849.3	-1.27 : 52850.4	-1.1 : 52847.1	-0.983 : 52852.6	-0.658 : 52851.5	-0.655 : 52848.2	-0.546 : 52853.7	-0.429 : 52856.10	-0.395 : 52854.8	-0.063 : 52855.9	52653	0	0	NaN	NaN	1	0	0.477717	0	0	-6.83917	0	0
ENSMUSG00000051316	TAF7		TAF7	A	TAF7 RNA polymerase II, TATA box binding protein (TBP)-associated factor, 55kDa	nucleus|transcription factor TFIID complex|Golgi apparatus|positive transcription elongation factor complex b|transcription factor TFTC complex|MLL1 complex|	negative regulation of transcription from RNA polymerase II promoter|spermine transport|DNA-templated transcription, initiation|transcription from RNA polymerase II promoter|transcription initiation from RNA polymerase II promoter|negative regulation of protein kinase activity|intracellular estrogen receptor signaling pathway|negative regulation of histone acetylation|negative regulation of trans…	sequence-specific DNA binding transcription factor activity|transcription coactivator activity|protein binding|transcription factor binding|histone acetyltransferase binding|vitamin D receptor binding|transcription regulatory region DNA binding|thyroid hormone receptor binding|	10	-1.8	23.2	0.082	0.00267	0.0224	-1.83	22.1	0.00939	-3.26	-1.17	-2.1 : 94237.1	-1.67 : 94244.8	-1.61 : 94239.3	-1.04 : 94241.5	-0.892 : 94242.6	-0.319 : 94243.7	-0.2 : 94238.2	-0.0885 : 94240.4	0.126 : 94246.10	0.194 : 94245.9	24074	0	0	NaN	NaN	1	0	0.285133	0	0	-5.31193	0	0
ENSMUSG00000034994	EEF2		EEF2	B	eukaryotic translation elongation factor 2	nucleus|cytosol|polysome|membrane|ribonucleoprotein complex|extracellular vesicular exosome|	GTP catabolic process|translation|translational elongation|cell death|gene expression|positive regulation of gene expression|cellular protein metabolic process|positive regulation of translation|	translation elongation factor activity|GTPase activity|GTP binding|translation activator activity|protein kinase binding|poly(A) RNA binding|	5	-7.5	186	1e-05	0.000494	0.00189	-2.01	19.4	0.00945	-3.73	-1.39	-2.12 : 146767.5	-1.73 : 146769.7	-0.992 : 146768.6	-0.581 : 146766.4	-0.316 : 146771.9						13629	0	-1	1	NaN	NaN	NaN	0.304517	0	0	-10.8607	1	0
ENSMUSG00000070284	GMPPB		GMPPB	B	GDP-mannose pyrophosphorylase B	cytoplasm|mitochondrion|extracellular vesicular exosome|	dolichol-linked oligosaccharide biosynthetic process|GDP-mannose biosynthetic process|GDP-mannose biosynthetic process|protein N-linked glycosylation via asparagine|post-translational protein modification|cellular protein metabolic process|	mannose-1-phosphate guanylyltransferase activity|GTP binding|	9	-4.5	91.9	6e-05	0.000231	0.000351	-1.23	19.4	0.00945	-1.92	-0.84	-1.4 : 185778.9	-1.35 : 185772.3	-1.22 : 185773.4	-0.757 : 185774.5	-0.691 : 185779.10	-0.588 : 185776.7	-0.402 : 185777.8	-0.269 : 185775.6	0.294 : 185771.2		331026	0	-1	NaN	NaN	NaN	NaN	NaN	NaN	NaN	-11.2868	1	0
ENSMUSG00000025980	HSPD1		HSPD1	B	heat shock 60kDa protein 1 (chaperonin)	extracellular space|cytoplasm|mitochondrion|mitochondrial inner membrane|mitochondrial matrix|early endosome|cytosol|plasma membrane|coated pit|cell surface|membrane|cyclin-dependent protein kinase activating kinase holoenzyme complex|coated vesicle|secretory granule|protein complex|lipopolysaccharide receptor complex|extracellular vesicular exosome|	B cell cytokine production|MyD88-dependent toll-like receptor signaling pathway|positive regulation of T cell mediated immune response to tumor cell|ATP catabolic process|'de novo' protein folding|activation of cysteine-type endopeptidase activity involved in apoptotic process|response to unfolded protein|viral process|positive regulation of interferon-alpha production|positive regulation of inte…	lipopolysaccharide binding|p53 binding|DNA replication origin binding|single-stranded DNA binding|double-stranded RNA binding|protein binding|ATP binding|ATPase activity|poly(A) RNA binding|unfolded protein binding|unfolded protein binding|chaperone binding|	9	-6.5	125	1e-05	0.0136	0.0104	-1.16	19.4	0.00945	-1.9	-0.85	-1.49 : 135504.7	-1.13 : 135507.10	-1.11 : 135503.6	-1.09 : 135500.3	-1.03 : 135505.8	-0.377 : 135506.9	-0.109 : 135501.4	0.256 : 135499.2	1.21 : 135502.5		15510	0	-1	NaN	NaN	NaN	NaN	0.28807	0	0	-1.66999	0	0
ENSMUSG00000069495	EPC2		EPC2	A	enhancer of polycomb homolog 2 (Drosophila)	Piccolo NuA4 histone acetyltransferase complex|	DNA repair|transcription, DNA-templated|regulation of transcription, DNA-templated|chromatin modification|	None	10	-0.3	0.547	0.745	6.46e-05	0.000124	-0.98	22	0.00961	-1.66	-0.61	-1.19 : 159982.10	-1.18 : 159975.3	-1.08 : 159980.8	-0.919 : 159974.2	-0.826 : 159978.6	-0.724 : 159973.1	-0.544 : 159976.4	-0.431 : 159977.5	-0.282 : 159981.9	0.322 : 159979.7	227867	0	0	NaN	NaN	1	0	0.625777	0	0	1.08567	0	0
ENSMUSG00000029229	CHIC2		CHIC2	B	cysteine-rich hydrophobic domain 2	cellular_component|Golgi-associated vesicle|plasma membrane|	biological_process|	molecular_function|protein binding|	10	-0.2	0.713	0.819	0.00135	0.00151	-0.83	19.1	0.00962	-1.54	-0.49	-1.06 : 53666.7	-0.918 : 53660.1	-0.894 : 53662.3	-0.834 : 53663.4	-0.787 : 53664.5	-0.525 : 53668.9	-0.359 : 53665.6	-0.262 : 53669.10	0.0367 : 53667.8	0.965 : 53661.2	74277	0	0	NaN	NaN	1	0	0.265657	0	0	-5.42034	0	0
ENSMUSG00000024974	SMC3		SMC3	B	structural maintenance of chromosomes 3	chromosome, centromeric region|chromatin|lateral element|spindle pole|basement membrane|nucleus|nucleoplasm|chromosome|cytoplasm|cytosol|cohesin complex|nuclear matrix|meiotic cohesin complex|nuclear meiotic cohesin complex|	mitotic cell cycle|regulation of DNA replication|DNA repair|mitotic spindle organization|sister chromatid cohesion|sister chromatid cohesion|mitotic nuclear division|meiotic nuclear division|signal transduction|stem cell maintenance|negative regulation of DNA endoreduplication|	chromatin binding|microtubule motor activity|protein binding|ATP binding|mediator complex binding|dynein binding|protein heterodimerization activity|	9	-4.1	50.1	0.00793	0.057	0.184	-1.92	19	0.00966	-3.64	-1.53	-2.05 : 147102.10	-1.92 : 147095.3	-1.86 : 147098.6	-0.503 : 147096.4	-0.256 : 147097.5	-0.143 : 147101.9	0.0037 : 147099.7	0.241 : 147094.2	0.51 : 147093.1		13006	0	0	1	NaN	1	0	0.438123	0	0	-3.50516	0	0
ENSMUSG00000004535	TAX1BP1		TAX1BP1	B	Tax1 (human T-cell leukemia virus type I) binding protein 1	cytosol|	apoptotic process|negative regulation of NF-kappaB transcription factor activity|negative regulation of type I interferon production|negative regulation of apoptotic process|innate immune response|	protein binding|kinase binding|	10	-1.7	6.21	0.392	0.0153	0.00998	-2.22	19	0.00966	-3.48	-1.13	-2.4 : 206515.2	-1.57 : 206521.8	-1.37 : 206520.7	-1.34 : 206518.5	-0.793 : 206517.4	-0.487 : 206522.9	-0.267 : 206519.6	0.051 : 206516.3	0.374 : 206514.1	0.761 : 206523.10	52440	0	0	NaN	NaN	1	0	0.35551	0	0	-1.92496	0	0
ENSMUSG00000026196	BARD1		BARD1	B	BRCA1 associated RING domain 1	ubiquitin ligase complex|nucleus|nucleus|nucleolus|cytoplasm|BRCA1-BARD1 complex|intracellular membrane-bounded organelle|BRCA1-A complex|	tissue homeostasis|DNA repair|cellular response to DNA damage stimulus|cell cycle arrest|protein ubiquitination|negative regulation of mRNA 3'-end processing|regulation of phosphorylation|positive regulation of apoptotic process|negative regulation of apoptotic process|positive regulation of protein catabolic process|negative regulation of protein export from nucleus|protein K6-linked ubiquitinat…	RNA binding|ubiquitin-protein transferase activity|ubiquitin-protein transferase activity|protein binding|zinc ion binding|ligase activity|kinase binding|protein homodimerization activity|protein heterodimerization activity|	9	-5.2	52.9	0.00544	0.000156	0.000168	-0.86	18.8	0.00986	-1.65	-0.5	-1.24 : 177956.3	-0.91 : 177954.1	-0.861 : 177955.2	-0.712 : 177958.5	-0.703 : 177962.9	-0.689 : 177961.8	-0.373 : 177960.7	-0.314 : 177959.6	0.195 : 177963.10		12021	0	0	NaN	NaN	1	0	0.38909	0	0	-2.39158	0	0
ENSMUSG00000027076	TIMM10		TIMM10	B	translocase of inner mitochondrial membrane 10 homolog (yeast)	mitochondrion|mitochondrial inner membrane|mitochondrial inner membrane|mitochondrial inner membrane presequence translocase complex|mitochondrial intermembrane space|mitochondrial intermembrane space protein transporter complex|	protein targeting to mitochondrion|sensory perception of sound|cellular protein metabolic process|protein import into mitochondrial inner membrane|protein import into mitochondrial inner membrane|chaperone-mediated protein transport|	transporter activity|protein binding|zinc ion binding|protein homodimerization activity|chaperone binding|	8	-4.5	117	1e-05	0.0023	0.0437	1.97	18.8	0.00986	1	3.61	-0.0071 : 209281.10	0.0789 : 209279.8	0.115 : 209276.5	0.223 : 209272.1	0.947 : 209280.9	0.992 : 209277.6	1.3 : 209278.7	2.12 : 209273.2			30059	0	-1	1	NaN	NaN	NaN	0.20968	0	0	-4.15752	1	0
ENSMUSG00000027298	TYRO3		TYRO3	B	TYRO3 protein tyrosine kinase	nucleus|nuclear envelope|endoplasmic reticulum membrane|integral component of plasma membrane|	natural killer cell differentiation|cell adhesion|signal transduction|spermatogenesis|phosphatidylinositol 3-kinase signaling|peptidyl-tyrosine phosphorylation|peptidyl-tyrosine phosphorylation|peptidyl-tyrosine phosphorylation|forebrain cell migration|signal transduction by phosphorylation|platelet activation|secretion by cell|negative regulation of toll-like receptor signaling pathway|substrate…	protein tyrosine kinase activity|transmembrane receptor protein tyrosine kinase activity|receptor signaling protein tyrosine kinase activity|protein binding|ATP binding|phosphatidylinositol 3-kinase binding|protein heterodimerization activity|	10	-2.3	1.98	0.668	0.0408	0.0531	1.79	18.8	0.00986	0.71	2.97	-2.52 : 144600.4	-0.451 : 144601.5	-0.00357 : 144602.6	0.173 : 144598.2	0.19 : 144597.1	0.334 : 144599.3	0.619 : 144603.7	0.929 : 144606.10	0.977 : 144605.9	1.96 : 144604.8	22174	0	0	NaN	NaN	1	0	0.327582	0	0	0.104884	0	0
ENSMUSG00000047163	OLFR65		OR51B6	D	olfactory receptor 65	plasma membrane|membrane|integral component of membrane|	signal transduction|G-protein coupled receptor signaling pathway|sensory perception of smell|response to stimulus|detection of chemical stimulus involved in sensory perception of smell|	signal transducer activity|G-protein coupled receptor activity|olfactory receptor activity|	10	-0.7	15.5	0.303	0.786	0.636	-3.2	20.2	0.00997	-6	-2.42	-3.25 : 753.9	-0.363 : 749.5	-0.267 : 754.10	-0.197 : 747.3	-0.188 : 751.7	-0.137 : 750.6	0.196 : 746.2	0.273 : 752.8	0.571 : 745.1	0.668 : 748.4	18365	0	0	NaN	0	1	0	0.158077	0	0	-1.34245	0	0
ENSMUSG00000058835	ABI1		ABI1	B	abl-interactor 1	intracellular|nucleus|endoplasmic reticulum|cytosol|postsynaptic density|lamellipodium|cell junction|filopodium|growth cone|SCAR complex|postsynaptic membrane|extracellular vesicular exosome|	somitogenesis|cellular component movement|transmembrane receptor protein tyrosine kinase signaling pathway|actin polymerization or depolymerization|negative regulation of cell proliferation|peptidyl-tyrosine phosphorylation|megakaryocyte development|Fc-gamma receptor signaling pathway involved in phagocytosis|innate immune response|positive regulation of protein tyrosine kinase activity|lamellipo…	protein binding|cytoskeletal protein binding|protein tyrosine kinase activator activity|protein complex binding|	10	-0.8	11.9	0.247	0.000429	0.012	-1.04	18.6	0.00998	-1.78	-0.68	-1.34 : 225569.2	-1.11 : 225571.4	-0.998 : 225570.3	-0.975 : 225575.8	-0.843 : 225573.6	-0.458 : 225572.5	-0.236 : 225568.1	-0.152 : 225574.7	-0.0242 : 225577.10	0.0699 : 225576.9	11308	0	0	NaN	NaN	1	0	0.370553	0	0	0.379945	0	0
ENSMUSG00000030697	PPP4C		PPP4C	B	protein phosphatase 4, catalytic subunit	nucleus|cytoplasm|microtubule organizing center|plasma membrane|protein phosphatase 4 complex|	regulation of double-strand break repair via homologous recombination|dephosphorylation|dephosphorylation|dephosphorylation|NIK/NF-kappaB signaling|	NF-kappaB-inducing kinase activity|protein serine/threonine phosphatase activity|protein serine/threonine phosphatase activity|protein binding|metal ion binding|	10	-3	75.4	0.00047	0.000305	0.000192	-1.33	18.6	0.00998	-2.29	-0.68	-1.6 : 168154.3	-1.38 : 168161.10	-0.975 : 168160.9	-0.834 : 168156.5	-0.712 : 168158.7	-0.516 : 168155.4	-0.49 : 168153.2	-0.39 : 168152.1	0.0161 : 168159.8	0.247 : 168157.6	56420	0	-1	NaN	NaN	NaN	NaN	0.196647	0	0	-6.28695	0	0
ENSMUSG00000019432	DDX39B		DDX39B	B	DEAD (Asp-Glu-Ala-Asp) box polypeptide 39B	transcription export complex|nucleus|spliceosomal complex|U4 snRNP|U6 snRNP|cytoplasm|nuclear speck|	spliceosomal complex assembly|mRNA splicing, via spliceosome|ATP catabolic process|ATP catabolic process|mRNA export from nucleus|mRNA export from nucleus|RNA splicing|RNA secondary structure unwinding|positive regulation of DNA-templated transcription, elongation|viral mRNA export from host cell nucleus|negative regulation of DNA damage checkpoint|	ATP-dependent RNA helicase activity|protein binding|ATP binding|RNA-dependent ATPase activity|U6 snRNA binding|U4 snRNA binding|ATP-dependent protein binding|poly(A) RNA binding|	9	-3.9	68.1	0.00104	0.0038	0.0144	-2.6	18.5	0.0101	-4.25	-1.11	-2.74 : 7836.1	-1.68 : 7844.9	-1.28 : 7837.2	-1.16 : 7838.3	-0.763 : 7840.5	-0.337 : 7845.10	-0.202 : 7843.8	0.0911 : 7839.4	0.39 : 7841.6		53817	0	-1	NaN	NaN	NaN	NaN	NaN	NaN	NaN	-6.77023	0	0
ENSMUSG00000021707	DHFR		DHFR	B	dihydrofolate reductase	None	None	None	10	-3.2	105	2e-05	0.132	0.0173	-1.88	18.5	0.0101	-3.19	-0.77	-2.07 : 148757.5	-1.3 : 148760.8	-1.21 : 148754.2	-0.868 : 148762.10	-0.833 : 148761.9	-0.406 : 148756.4	0.132 : 148755.3	0.247 : 148753.1	0.606 : 148759.7	1.4 : 148758.6	13361	0	-1	NaN	NaN	NaN	NaN	0.49503	0	0	-9.9014	1	0
ENSMUSG00000039662	ICMT		ICMT	C	isoprenylcysteine carboxyl methyltransferase	endoplasmic reticulum|endoplasmic reticulum membrane|membrane|integral component of membrane|	in utero embryonic development|liver development|cellular protein modification process|C-terminal protein methylation|protein targeting to membrane|positive regulation of cell proliferation|multicellular organism growth|regulation of Ras protein signal transduction|regulation of RNA biosynthetic process|	protein C-terminal carboxyl O-methyltransferase activity|protein C-terminal S-isoprenylcysteine carboxyl O-methyltransferase activity|cAMP response element binding protein binding|	10	-2.4	48.7	0.00768	0.0283	0.00372	-1.48	21.7	0.0101	-2.5	-0.88	-1.8 : 140183.9	-1.29 : 140175.1	-1.19 : 140180.6	-1.1 : 140179.5	-1.04 : 140176.2	-0.727 : 140184.10	-0.109 : 140181.7	0.0695 : 140182.8	0.702 : 140178.4	1.01 : 140177.3	57295	0	0	NaN	NaN	1	0	0.324626	0	0	-1.00771	0	0
ENSMUSG00000030842	LAMTOR1		LAMTOR1	C	late endosomal/lysosomal adaptor, MAPK and MTOR activator 1	lysosome|lysosomal membrane|Golgi apparatus|plasma membrane|late endosome membrane|intracellular membrane-bounded organelle|membrane raft|extracellular vesicular exosome|Ragulator complex|	regulation of receptor recycling|endosome organization|lysosome organization|regulation of cholesterol esterification|regulation of cholesterol efflux|cell growth|positive regulation of TOR signaling|lysosome localization|endosome localization|cellular protein localization|cholesterol homeostasis|positive regulation of MAPK cascade|positive regulation of GTPase activity|regulation of cholesterol …	guanyl-nucleotide exchange factor activity|protein binding|protein complex scaffold|	10	-2.6	90.9	3e-05	0.0161	0.00306	-1.35	21.7	0.0101	-2.34	-0.98	-1.5 : 207104.3	-1.43 : 207102.1	-1.34 : 207106.5	-1.32 : 207105.4	-0.962 : 207110.9	-0.598 : 207111.10	-0.368 : 207108.7	0.228 : 207103.2	0.328 : 207109.8	0.49 : 207107.6	66508	0	-1	NaN	NaN	NaN	NaN	0.213577	0	0	NaN	NaN	0
ENSMUSG00000041583	OBOX6			D	oocyte specific homeobox 6	cellular_component|nucleus|	biological_process|	DNA binding|	10	0	0	0.955	0.0363	0.0417	-3.12	20	0.0101	-6	-1.53	-3.21 : 116247.7	-0.988 : 116250.10	-0.74 : 116246.6	-0.466 : 116242.2	-0.317 : 116245.5	-0.207 : 116241.1	-0.192 : 116244.4	-0.141 : 116248.8	0.186 : 116249.9	0.899 : 116243.3	252830	0	0	NaN	NaN	1	0	NaN	NaN	NaN	-2.18266	0	0
ENSMUSG00000026275	PPP1R7		PPP1R7	B	protein phosphatase 1, regulatory subunit 7	nucleus|chromosome|cytoplasm|extracellular vesicular exosome|	biological_process|positive regulation of protein dephosphorylation|regulation of catalytic activity|regulation of catalytic activity|	protein phosphatase type 1 regulator activity|enzyme regulator activity|	9	-3.6	88.4	0.00011	0.000992	0.00453	-0.93	18.5	0.0101	-1.72	-0.57	-1.24 : 138340.3	-0.972 : 138338.1	-0.923 : 138342.5	-0.861 : 138339.2	-0.769 : 138347.10	-0.49 : 138346.9	-0.21 : 138344.7	-0.0747 : 138341.4	0.247 : 138343.6		66385	0	-1	NaN	NaN	NaN	NaN	0.27855	0	0	-4.95935	0	0
ENSMUSG00000026727	RSU1		RSU1	B	Ras suppressor protein 1	cytosol|extracellular vesicular exosome|	signal transduction|Ras protein signal transduction|cell junction assembly|	None	10	-1.5	27	0.0679	0.00212	0.00128	-0.88	18.4	0.0101	-1.58	-0.49	-1.09 : 92950.4	-1.01 : 92948.2	-0.921 : 92951.5	-0.752 : 92954.8	-0.704 : 92956.10	-0.612 : 92952.6	-0.425 : 92949.3	-0.271 : 92947.1	0.304 : 92953.7	0.329 : 92955.9	20163	0	0	NaN	NaN	1	0	0.332883	0	0	-0.513845	0	0
ENSMUSG00000015697	SETDB1		SETDB1	B	SET domain, bifurcated 1	nucleus|chromosome|cytoplasm|Golgi apparatus|plasma membrane|	inner cell mass cell proliferation|transcription, DNA-templated|regulation of transcription, DNA-templated|histone lysine methylation|bone development|	DNA binding|protein binding|zinc ion binding|histone-lysine N-methyltransferase activity|	10	0	0	0.942	0.000454	0.0104	-1.05	18.4	0.0101	-1.77	-0.66	-1.22 : 37808.2	-1.21 : 37810.4	-1.04 : 37815.9	-0.871 : 37813.7	-0.806 : 37809.3	-0.481 : 37816.10	-0.181 : 37807.1	-0.137 : 37812.6	-0.0762 : 37814.8	0.085 : 37811.5	84505	0	0	NaN	NaN	1	0	0.471849	0	0	-5.14653	0	0
ENSMUSG00000049946	BC030500			D	cDNA sequence BC030500	cellular_component|	biological_process|	molecular_function|	10	2.1	3.79	0.668	0.671	0.48	-5.9	19.9	0.0102	-11	-5.46	-5.93 : 92788.1	-0.64 : 92795.8	-0.118 : 92793.6	0.0616 : 92792.5	0.0803 : 92790.3	0.129 : 92789.2	0.161 : 92796.9	0.226 : 92794.7	0.355 : 92791.4	0.674 : 92797.10	234290	0	0	NaN	NaN	1	0	NaN	NaN	NaN	-5.17703	0	0
ENSMUSG00000020914	TOP2A		TOP2A	A	topoisomerase (DNA) II alpha 170kDa	nuclear chromosome|condensed chromosome|nucleus|nucleoplasm|nucleoplasm|nucleolus|centriole|DNA topoisomerase complex (ATP-hydrolyzing)|viral integration complex|protein complex|	mitotic cell cycle|resolution of meiotic recombination intermediates|sister chromatid segregation|ATP catabolic process|ATP catabolic process|DNA replication|DNA topological change|DNA ligation|DNA unwinding involved in DNA replication|DNA repair|mitotic recombination|cellular response to DNA damage stimulus|chromosome segregation|apoptotic chromosome condensation|embryonic cleavage|positive regu…	magnesium ion binding|DNA binding|chromatin binding|DNA topoisomerase type II (ATP-hydrolyzing) activity|protein kinase C binding|protein binding|ATP binding|protein C-terminus binding|DNA-dependent ATPase activity|drug binding|DNA binding, bending|enzyme binding|protein homodimerization activity|histone deacetylase binding|ubiquitin binding|poly(A) RNA binding|protein heterodimerization activity|	9	-5.5	135	1e-05	0.0294	0.00896	-2.1	21.8	0.0102	-3.66	-1.57	-2.3 : 35964.8	-2.17 : 35957.1	-1.57 : 35962.6	-0.825 : 35960.4	-0.618 : 35965.9	-0.412 : 35963.7	-0.0333 : 35966.10	0.552 : 35959.3	1.71 : 35961.5		21973	0	-1	NaN	NaN	NaN	NaN	0.277707	0	0	-6.81443	1	0
ENSMUSG00000036270	EDC4		EDC4	B	enhancer of mRNA decapping 4	cytoplasmic mRNA processing body|nucleus|cytoplasm|cytosol|membrane|intracellular membrane-bounded organelle|	nuclear-transcribed mRNA catabolic process, deadenylation-dependent decay|biological_process|gene expression|RNA metabolic process|mRNA metabolic process|exonucleolytic nuclear-transcribed mRNA catabolic process involved in deadenylation-dependent decay|	protein binding|	10	0	0	0.942	0.000134	0.000748	-0.9	18	0.0103	-1.62	-0.49	-1.2 : 8854.6	-0.946 : 8858.10	-0.943 : 8856.8	-0.743 : 8853.5	-0.658 : 8851.3	-0.582 : 8849.1	-0.535 : 8850.2	-0.153 : 8852.4	-0.041 : 8857.9	-0.00524 : 8855.7	234699	0	0	NaN	NaN	1	0	0.254197	0	0	-16.0812	1	0
ENSMUSG00000073676	HSPE1		HSPE1	B	heat shock 10kDa protein 1	mitochondrion|mitochondrion|mitochondrial matrix|membrane|extracellular vesicular exosome|	osteoblast differentiation|protein folding|activation of cysteine-type endopeptidase activity involved in apoptotic process|response to unfolded protein|	protein binding|ATP binding|poly(A) RNA binding|unfolded protein binding|chaperone binding|chaperone binding|	5	-5.8	202	1e-05	0.000496	0.00164	-1.83	18	0.0103	-2.96	-1.35	-1.95 : 115746.4	-1.66 : 115744.2	-1.0 : 115750.8	-0.548 : 115748.6	-0.326 : 115749.7						15528	0	-1	1	NaN	NaN	NaN	0.228083	0	0	-0.0368692	0	0
ENSMUSG00000038615	NFE2L1		NFE2L1	B	nuclear factor, erythroid 2-like 1	nucleus|endoplasmic reticulum membrane|integral component of membrane|	transcription from RNA polymerase II promoter|heme biosynthetic process|inflammatory response|anatomical structure morphogenesis|erythrocyte differentiation|positive regulation of transcription from RNA polymerase II promoter|	RNA polymerase II transcription factor binding transcription factor activity involved in positive regulation of transcription|sequence-specific DNA binding transcription factor activity|transcription cofactor activity|sequence-specific DNA binding|	10	-0.8	18.1	0.193	1.97e-05	2.35e-05	-0.76	18	0.0103	-3.74	-0.46	-2.96 : 60996.2	-1.03 : 61001.7	-0.971 : 61002.8	-0.847 : 61000.6	-0.731 : 61003.9	-0.626 : 60999.5	-0.593 : 61004.10	-0.438 : 60995.1	-0.342 : 60997.3	0.11 : 60998.4	18023	0	0	NaN	NaN	1	0	0.259158	0	0	-6.89292	0	1
ENSMUSG00000020857	NME2		NME2	B	NME/NM23 nucleoside diphosphate kinase 2	ruffle|nucleus|cytoplasm|cytosol|lamellipodium|extracellular vesicular exosome|cell periphery|	nucleoside diphosphate phosphorylation|GTP biosynthetic process|UTP biosynthetic process|CTP biosynthetic process|transcription, DNA-templated|regulation of transcription, DNA-templated|cell adhesion|integrin-mediated signaling pathway|nucleoside triphosphate biosynthetic process|nucleobase-containing small molecule interconversion|peptidyl-histidine phosphorylation|negative regulation of apoptot…	DNA binding|sequence-specific DNA binding transcription factor activity|nucleoside diphosphate kinase activity|protein histidine kinase activity|protein binding|ATP binding|metal ion binding|	10	-1.2	23.9	0.0987	0.00139	0.00381	-2.05	18.1	0.0103	-3.38	-0.97	-2.24 : 124269.6	-1.51 : 124271.8	-1.33 : 124266.3	-0.876 : 124267.4	-0.819 : 124270.7	-0.352 : 124264.1	-0.352 : 124268.5	-0.154 : 124272.9	0.00924 : 124273.10	0.411 : 124265.2	18103	0	0	NaN	NaN	1	0	0.168303	0	0	-0.483133	0	0
ENSMUSG00000024477	PGGT1B		PGGT1B	B	protein geranylgeranyltransferase type I, beta subunit	CAAX-protein geranylgeranyltransferase complex|	positive regulation of cell proliferation|protein geranylgeranylation|response to cytokine|positive regulation of cell cycle|negative regulation of nitric-oxide synthase biosynthetic process|	protein geranylgeranyltransferase activity|CAAX-protein geranylgeranyltransferase activity|zinc ion binding|	9	-4.4	129	1e-05	0.00509	0.00534	-1.89	18.1	0.0103	-3.37	-0.85	-2.07 : 195506.3	-1.59 : 195509.6	-0.868 : 195505.2	-0.86 : 195507.4	-0.689 : 195508.5	-0.46 : 195504.1	-0.064 : 195513.10	0.0322 : 195512.9	0.434 : 195511.8		225467	0	-1	NaN	NaN	NaN	NaN	0.360321	0	0	-2.91297	0	0
ENSMUSG00000026701	PRDX6		PRDX6	B	peroxiredoxin 6	extracellular space|cytoplasm|lysosome|cytosol|cytosol|membrane|cytoplasmic membrane-bounded vesicle|extracellular vesicular exosome|	response to oxidative stress|phospholipid catabolic process|hydrogen peroxide catabolic process|oxidation-reduction process|	glutathione peroxidase activity|phospholipase A2 activity|protein binding|antioxidant activity|peroxiredoxin activity|	9	-1.5	29	0.0533	0.000996	0.00204	-2.41	18.1	0.0103	-4.33	-1.18	-2.56 : 34176.2	-1.89 : 34182.8	-0.837 : 34178.4	-0.697 : 34181.7	-0.667 : 34183.9	-0.638 : 34179.5	-0.255 : 34184.10	-0.148 : 34180.6	0.64 : 34175.1		11758	0	0	NaN	NaN	1	0	0.276937	0	0	0.263942	0	0
ENSMUSG00000079477	RAB7		RAB7A	B	RAB7, member RAS oncogene family	intracellular|cell|cytoplasm|lysosome|lysosome|endosome|late endosome|late endosome|late endosome|Golgi apparatus|membrane|cytoplasmic vesicle|intracellular membrane-bounded organelle|phagocytic vesicle|extracellular vesicular exosome|alveolar lamellar body|	GTP catabolic process|protein targeting to lysosome|transport|intracellular protein transport|epidermal growth factor catabolic process|small GTPase mediated signal transduction|endosome to lysosome transport|protein transport|early endosome to late endosome transport|bone resorption|phagosome acidification|phagosome-lysosome fusion|	nucleotide binding|GTPase activity|protein binding|GTP binding|GDP binding|Rac GTPase binding|	9	-1	14.5	0.217	2.67e-05	0.000146	-1.26	18.1	0.0103	-2.23	-0.58	-1.53 : 223474.8	-1.29 : 223473.7	-0.844 : 223475.9	-0.696 : 223476.10	-0.682 : 223470.4	-0.622 : 223467.1	-0.622 : 223472.6	-0.172 : 223471.5	-0.116 : 223468.2		19349	1	0	NaN	NaN	1	0	0.341883	0	0	-4.42298	0	0
ENSMUSG00000060038	DHPS		DHPS	B	deoxyhypusine synthase	cytosol|	translation|positive regulation of cell proliferation|peptidyl-lysine modification to peptidyl-hypusine|post-translational protein modification|cellular protein metabolic process|deoxyhypusine biosynthetic process from spermidine|protein homotetramerization|	protein binding|deoxyhypusine synthase activity|	7	-5.8	225	1e-05	0.443	0.173	1.92	17.9	0.0104	1.18	3.81	-1.43 : 100501.4	-0.767 : 100507.10	-0.0747 : 100506.9	0.125 : 100504.7	1.08 : 100503.6	1.19 : 100502.5	2.05 : 100498.1				330817	0	-1	NaN	NaN	NaN	NaN	0.227313	0	0	-0.979435	0	0
ENSMUSG00000028156	EIF4E		EIF4E	B	eukaryotic translation initiation factor 4E	cytoplasmic mRNA processing body|cytoplasm|cytosol|mRNA cap binding complex|cytoplasmic stress granule|eukaryotic translation initiation factor 4F complex|RISC complex|chromatoid body|extracellular vesicular exosome|	G1/S transition of mitotic cell cycle|nuclear-transcribed mRNA catabolic process, deadenylation-dependent decay|nuclear-transcribed mRNA poly(A) tail shortening|mRNA export from nucleus|translation|translational initiation|regulation of translation|insulin receptor signaling pathway|gene expression|viral process|RNA metabolic process|mRNA metabolic process|cytokine-mediated signaling pathway|lung…	RNA cap binding|translation initiation factor activity|translation initiation factor activity|protein binding|eukaryotic initiation factor 4G binding|poly(A) RNA binding|	9	-5.3	101	2e-05	9.37e-05	3.5e-05	-0.88	17.8	0.0104	-3.13	-0.54	-2.32 : 210449.4	-1.04 : 210455.10	-1.04 : 210447.2	-0.734 : 210454.9	-0.663 : 210451.6	-0.643 : 210446.1	-0.443 : 210453.8	-0.416 : 210448.3	0.188 : 210450.5		13684	0	-1	NaN	NaN	NaN	NaN	0.62214	0	0	-8.21259	1	0
ENSMUSG00000091512	LAMTOR3		LAMTOR3	B	late endosomal/lysosomal adaptor, MAPK and MTOR activator 3	extracellular vesicular exosome|Ragulator complex|	positive regulation of TOR signaling|cellular protein localization|positive regulation of GTPase activity|cellular response to amino acid stimulus|	guanyl-nucleotide exchange factor activity|protein binding|protein complex scaffold|	10	-2	49	0.00906	3.71e-05	7.19e-05	-0.71	17.9	0.0104	-2.76	-0.41	-2.19 : 105809.10	-0.925 : 105803.4	-0.826 : 105805.6	-0.725 : 105801.2	-0.661 : 105802.3	-0.621 : 105806.7	-0.492 : 105808.9	-0.492 : 105800.1	-0.0843 : 105804.5	-0.00432 : 105807.8	56692	4	0	NaN	NaN	1	0	0.40266	0	0	-1.33726	0	0
ENSMUSG00000039703	NPLOC4		NPLOC4	C	nuclear protein localization 4 homolog (S. cerevisiae)	nucleus|endoplasmic reticulum|cytosol|nuclear outer membrane-endoplasmic reticulum membrane network|	Golgi organization|ER-associated ubiquitin-dependent protein catabolic process|membrane fusion|	protein binding|zinc ion binding|	9	-1.7	53.3	0.00453	0.000618	0.000842	-1.64	21.6	0.0104	-2.69	-1.14	-1.8 : 150877.4	-1.66 : 150883.10	-1.41 : 150882.9	-0.976 : 150878.5	-0.637 : 150880.7	-0.453 : 150875.2	-0.386 : 150876.3	-0.151 : 150879.6	0.51 : 150881.8		217365	0	0	NaN	NaN	1	0	0.21616	0	0	-2.76546	0	0
ENSMUSG00000046111	5830418K08RIK	CEP295	CEP295	D	N/A	None	None	None	10	-0.3	2.03	0.771	2.12e-05	0.000171	-1.44	19.2	0.0105	-2.39	-0.77	-1.74 : 99453.8	-1.58 : 99446.1	-1.17 : 99455.10	-1.14 : 99452.7	-0.984 : 99449.4	-0.761 : 99447.2	-0.732 : 99448.3	-0.454 : 99454.9	-0.323 : 99451.6	0.0345 : 99450.5	319675	0	0	NaN	NaN	1	0	NaN	NaN	NaN	-1.71138	0	0
ENSMUSG00000025135	ANAPC11		ANAPC11	B	anaphase promoting complex subunit 11	nucleus|nucleoplasm|anaphase-promoting complex|nucleolus|cytosol|	mitotic cell cycle|mitotic nuclear division|mitotic spindle assembly checkpoint|protein ubiquitination|anaphase-promoting complex-dependent proteasomal ubiquitin-dependent protein catabolic process|negative regulation of ubiquitin-protein ligase activity involved in mitotic cell cycle|positive regulation of ubiquitin-protein ligase activity involved in mitotic cell cycle|regulation of ubiquitin-p…	ubiquitin-protein transferase activity|zinc ion binding|	9	-4.8	94.1	5e-05	2.74e-05	7.02e-05	-0.79	17.7	0.0105	-1.55	-0.43	-1.11 : 44548.3	-0.84 : 44547.2	-0.829 : 44554.9	-0.723 : 44555.10	-0.673 : 44549.4	-0.557 : 44550.5	-0.392 : 44553.8	-0.364 : 44546.1	-0.0747 : 44552.7		66156	0	-1	NaN	NaN	NaN	NaN	0.234917	0	0	-2.67968	0	0
ENSMUSG00000066175	2510046G10RIK			D	N/A	None	None	None	10	0.4	0.494	0.884	0.00152	0.0238	-2.32	18.7	0.0106	-4.43	-1.57	-2.51 : 57879.3	-2.34 : 57885.9	-1.74 : 57877.1	-0.777 : 57878.2	-0.445 : 57884.8	-0.398 : 57881.5	-0.303 : 57883.7	-0.157 : 57882.6	-0.064 : 57880.4	0.21 : 57886.10	NaN	0	0	NaN	NaN	NaN	NaN	NaN	NaN	NaN	NaN	NaN	NaN
ENSMUSG00000039041	ADRM1		ADRM1	B	adhesion regulating molecule 1	proteasome complex|nucleus|cytoplasm|plasma membrane|integral component of plasma membrane|membrane|	transcription elongation from RNA polymerase II promoter|positive regulation of endopeptidase activity|proteasome assembly|	protease binding|protein binding|endopeptidase activator activity|proteasome binding|	8	0.3	0.575	0.839	6.34e-05	0.000469	-0.75	17.4	0.0106	-1.54	-0.42	-0.885 : 137518.7	-0.846 : 137521.10	-0.812 : 137516.5	-0.783 : 137519.8	-0.652 : 137512.1	-0.543 : 137513.2	-0.228 : 137517.6	-0.176 : 137514.3			56436	2	0	NaN	NaN	1	0	0.341137	0	0	4.41417	0	0
ENSMUSG00000052459	ATP6V1A		ATP6V1A	B	ATPase, H+ transporting, lysosomal 70kDa, V1 subunit A	mitochondrion|lysosomal membrane|cytosol|cytosol|plasma membrane|integral component of plasma membrane|microvillus|apical plasma membrane|proton-transporting two-sector ATPase complex|proton-transporting V-type ATPase, V1 domain|extracellular vesicular exosome|	transport|cellular iron ion homeostasis|insulin receptor signaling pathway|ATP hydrolysis coupled proton transport|transferrin transport|ATP metabolic process|interaction with host|transmembrane transport|phagosome maturation|	ATP binding|proton-transporting ATPase activity, rotational mechanism|	10	-4.4	101	2e-05	0.00281	0.00113	-1.15	17.5	0.0106	-2.33	-0.53	-1.74 : 213543.9	-1.18 : 213537.3	-0.826 : 213539.5	-0.812 : 213541.7	-0.696 : 213540.6	-0.666 : 213542.8	-0.478 : 213538.4	-0.254 : 213544.10	0.283 : 213535.1	0.958 : 213536.2	11964	0	-1	NaN	NaN	NaN	NaN	0.36827	0	0	-1.42528	0	0
ENSMUSG00000021420	FARS2		FARS2	B	phenylalanyl-tRNA synthetase 2, mitochondrial	mitochondrial matrix|	tRNA aminoacylation for protein translation|phenylalanyl-tRNA aminoacylation|tRNA processing|gene expression|	tRNA binding|magnesium ion binding|phenylalanine-tRNA ligase activity|ATP binding|	10	-3.3	41	0.018	0.00548	0.0112	-1.16	17.4	0.0106	-1.87	-0.82	-1.32 : 20059.5	-1.27 : 20061.7	-1.17 : 20062.8	-1.1 : 20055.1	-0.603 : 20060.6	-0.471 : 20058.4	-0.197 : 20057.3	-0.0747 : 20063.9	0.167 : 20064.10	0.358 : 20056.2	69955	0	0	NaN	NaN	1	0	0.649764	0	1	-10.3124	1	0
ENSMUSG00000033307	MIF		MIF	B	macrophage migration inhibitory factor (glycosylation-inhibiting factor)	extracellular region|extracellular space|cytoplasm|cell surface|extracellular vesicular exosome|	prostaglandin biosynthetic process|negative regulation of mature B cell apoptotic process|inflammatory response|cell surface receptor signaling pathway|cell aging|cell proliferation|negative regulation of gene expression|positive regulation of protein kinase A signaling|carboxylic acid metabolic process|DNA damage response, signal transduction by p53 class mediator|positive regulation of B cell p…	dopachrome isomerase activity|receptor binding|cytokine activity|cytokine receptor binding|protein binding|chemoattractant activity|phenylpyruvate tautomerase activity|	10	-3.1	58.4	0.00255	0.000906	0.000281	-0.87	17.5	0.0106	-2.06	-0.48	-1.56 : 58139.7	-0.92 : 58140.8	-0.864 : 58134.2	-0.804 : 58133.1	-0.773 : 58141.9	-0.621 : 58137.5	-0.39 : 58136.4	-0.364 : 58142.10	0.0445 : 58138.6	1.08 : 58135.3	17319	0	-1	NaN	NaN	NaN	NaN	NaN	NaN	NaN	-3.63614	0	0
ENSMUSG00000026005	RPE		RPE	B	ribulose-5-phosphate-3-epimerase	cytosol|	carbohydrate metabolic process|carbohydrate metabolic process|pentose-phosphate shunt|pentose-phosphate shunt|small molecule metabolic process|	ribulose-phosphate 3-epimerase activity|ribulose-phosphate 3-epimerase activity|identical protein binding|protein homodimerization activity|metal ion binding|	10	-1.2	39.9	0.0192	0.000538	0.000327	-1.48	17.5	0.0106	-2.5	-0.86	-1.62 : 31484.3	-1.59 : 31486.5	-1.15 : 31490.9	-0.887 : 31482.1	-0.543 : 31491.10	-0.466 : 31489.8	-0.354 : 31487.6	-0.354 : 31483.2	0.129 : 31485.4	0.132 : 31488.7	66646	0	0	NaN	NaN	1	0	0.386293	0	0	-0.907974	0	0
ENSMUSG00000022241	TARS		TARS	B	threonyl-tRNA synthetase	cytoplasm|cytoplasm|cytosol|actin cytoskeleton|extracellular vesicular exosome|	translation|tRNA aminoacylation for protein translation|threonyl-tRNA aminoacylation|gene expression|	threonine-tRNA ligase activity|threonine-tRNA ligase activity|ATP binding|protein homodimerization activity|	10	-4.9	61.4	0.0018	0.0381	0.00457	1.94	17.5	0.0106	-1.21	4	-1.11 : 87095.1	-1.09 : 87096.2	-1.04 : 87104.10	-0.741 : 87097.3	-0.731 : 87098.4	-0.485 : 87100.6	-0.339 : 87099.5	0.203 : 87102.8	1.91 : 87103.9	2.04 : 87101.7	110960	0	-1	NaN	NaN	NaN	NaN	0.196883	0	0	0.643604	0	0
ENSMUSG00000058355	ABCE1		ABCE1	B	ATP-binding cassette, sub-family E (OABP), member 1	cytoplasm|mitochondrion|membrane|	ATP catabolic process|RNA catabolic process|response to virus|viral process|negative regulation of catalytic activity|	ATP binding|ribonuclease inhibitor activity|ATPase activity|iron-sulfur cluster binding|	8	-5.7	136	1e-05	0.00766	0.000881	-1.84	17.2	0.0108	-3.27	-0.47	-2.02 : 18064.10	-1.03 : 18061.7	-0.897 : 18058.4	-0.691 : 18057.3	-0.691 : 18060.6	-0.603 : 18063.9	0.106 : 18055.1	2.83 : 18062.8			24015	0	-1	NaN	NaN	NaN	NaN	0.299946	0	0	-10.3217	1	0
ENSMUSG00000035632	CNOT3		CNOT3	D	CCR4-NOT transcription complex, subunit 3	cytoplasmic mRNA processing body|nucleus|cytosol|CCR4-NOT complex|	nuclear-transcribed mRNA catabolic process, deadenylation-dependent decay|nuclear-transcribed mRNA poly(A) tail shortening|trophectodermal cell differentiation|transcription, DNA-templated|regulation of transcription, DNA-templated|regulation of translation|gene expression|RNA metabolic process|mRNA metabolic process|gene silencing by RNA|regulation of stem cell maintenance|	protein binding|	10	-0.4	1.16	0.828	3.5e-05	0.000537	-1.04	18.5	0.0108	-1.78	-0.65	-1.35 : 165590.8	-1.19 : 165588.6	-1.09 : 165589.7	-1.07 : 165586.4	-1.04 : 165592.10	-0.798 : 165591.9	-0.628 : 165587.5	-0.433 : 165583.1	-0.262 : 165584.2	0.0389 : 165585.3	232791	0	0	NaN	NaN	1	0	0.394803	0	0	-12.986	1	1
ENSMUSG00000023944	HSP90AB1		HSP90AB1	B	heat shock protein 90kDa alpha (cytosolic), class B member 1	cytoplasm|mitochondrion|cytosol|COP9 signalosome|cell surface|membrane|inclusion body|basolateral plasma membrane|apical plasma membrane|brush border membrane|melanosome|extracellular vesicular exosome|	placenta development|protein folding|response to unfolded protein|axon guidance|response to salt stress|positive regulation of protein binding|negative regulation of proteasomal ubiquitin-dependent protein catabolic process|positive regulation of protein import into nucleus, translocation|nucleotide-binding domain, leucine rich repeat containing receptor signaling pathway|Fc-gamma receptor signal…	UTP binding|CTP binding|double-stranded RNA binding|protein binding|ATP binding|GTP binding|sulfonylurea receptor binding|protein kinase binding|MHC class II protein complex binding|nitric-oxide synthase regulator activity|TPR domain binding|dATP binding|ion channel binding|poly(A) RNA binding|unfolded protein binding|	10	-4.1	75.6	0.00045	0.0102	0.006	-1.34	17.1	0.0108	-2.46	-0.84	-1.64 : 27349.2	-1.33 : 27353.6	-1.15 : 27348.1	-1.07 : 27354.7	-0.754 : 27350.3	-0.263 : 27351.4	-0.227 : 27352.5	-0.197 : 27357.10	0.49 : 27356.9	0.518 : 27355.8	15516	0	-1	NaN	NaN	NaN	NaN	0.331483	0	0	-6.63403	0	0
ENSMUSG00000024660	INCENP		INCENP	B	inner centromere protein antigens 135/155kDa	chromosome, centromeric region|kinetochore|condensed chromosome kinetochore|lateral element|central element|centromeric heterochromatin|spindle|cytosol|microtubule|chromocenter|midbody|protein complex|	mitotic cell cycle|cytokinesis|chromosome segregation|mitotic nuclear division|	protein binding|	10	-4.5	103	2e-05	0.00363	0.000567	-1.57	17.2	0.0108	-2.46	-0.53	-1.85 : 141324.6	-1.16 : 141323.5	-0.878 : 141319.1	-0.875 : 141328.10	-0.635 : 141320.2	-0.54 : 141326.8	-0.454 : 141327.9	-0.322 : 141325.7	0.462 : 141321.3	0.703 : 141322.4	16319	0	-1	NaN	NaN	NaN	NaN	0.537746	0	0	-2.44186	0	1
ENSMUSG00000042447	MIOS		MIOS	B	missing oocyte, meiosis regulator, homolog (Drosophila)	lysosomal membrane|	None	None	10	-1.7	17.5	0.196	8.51e-05	0.00194	-0.85	17.1	0.0108	-1.59	-0.48	-1.0 : 142067.3	-0.968 : 142065.1	-0.934 : 142069.5	-0.867 : 142066.2	-0.636 : 142074.10	-0.392 : 142068.4	-0.317 : 142073.9	-0.242 : 142071.7	-0.11 : 142072.8	-0.0675 : 142070.6	252875	0	0	NaN	NaN	1	0	0.332957	0	0	1.0495	0	0
ENSMUSG00000035960	APEX1		APEX1	B	APEX nuclease (multifunctional DNA repair enzyme) 1	nucleus|nucleoplasm|nucleoplasm|transcription factor complex|nucleolus|cytoplasm|mitochondrion|endoplasmic reticulum|centrosome|ribosome|nuclear speck|perinuclear region of cytoplasm|	DNA catabolic process, endonucleolytic|DNA catabolic process, endonucleolytic|DNA catabolic process, endonucleolytic|DNA catabolic process, exonucleolytic|DNA repair|DNA repair|base-excision repair|base-excision repair|DNA recombination|transcription, DNA-templated|regulation of transcription, DNA-templated|aging|negative regulation of smooth muscle cell migration|response to drug|regulation of m…	DNA binding|damaged DNA binding|transcription coactivator activity|transcription corepressor activity|DNA-(apurinic or apyrimidinic site) lyase activity|DNA-(apurinic or apyrimidinic site) lyase activity|endonuclease activity|endodeoxyribonuclease activity|RNA-DNA hybrid ribonuclease activity|phosphodiesterase I activity|uracil DNA N-glycosylase activity|protein binding|phosphoric diester hydrola…	10	-1.7	10.7	0.267	0.000457	0.00105	-2.36	17	0.0109	-3.78	-0.74	-2.53 : 41238.4	-1.49 : 41236.2	-1.07 : 41241.7	-0.799 : 41239.5	-0.733 : 41242.8	-0.543 : 41243.9	-0.486 : 41244.10	-0.259 : 41240.6	-0.0592 : 41235.1	0.484 : 41237.3	11792	0	0	NaN	NaN	1	0	0.26775	0	0	-11.1247	1	0
ENSMUSG00000038622	MED30		MED30	C	mediator complex subunit 30	nucleus|nucleoplasm|mediator complex|	regulation of transcription from RNA polymerase II promoter|transcription initiation from RNA polymerase II promoter|transcription initiation from RNA polymerase II promoter|gene expression|stem cell maintenance|intracellular steroid hormone receptor signaling pathway|androgen receptor signaling pathway|positive regulation of transcription, DNA-templated|	RNA polymerase II transcription cofactor activity|transcription cofactor activity|receptor activity|protein binding|ligand-dependent nuclear receptor transcription coactivator activity|vitamin D receptor binding|thyroid hormone receptor binding|	10	-5.1	50.6	0.00602	5.86e-05	0.000412	-2.24	21.5	0.0109	-3.33	-0.79	-2.42 : 146117.1	-1.61 : 146120.4	-0.989 : 146118.2	-0.921 : 146123.7	-0.694 : 146119.3	-0.656 : 146125.9	-0.604 : 146124.8	-0.341 : 146126.10	-0.145 : 146121.5	0.126 : 146122.6	69790	0	0	NaN	NaN	1	0	0.47396	0	0	-3.36662	0	0
ENSMUSG00000027618	NFS1		NFS1	B	NFS1 cysteine desulfurase	nucleus|cytoplasm|mitochondrion|mitochondrial matrix|mitochondrial matrix|cytosol|cytosol|	sulfur amino acid metabolic process|protein complex assembly|cysteine metabolic process|vitamin metabolic process|water-soluble vitamin metabolic process|Mo-molybdopterin cofactor biosynthetic process|iron incorporation into metallo-sulfur cluster|molybdopterin cofactor biosynthetic process|small molecule metabolic process|	protein binding|pyridoxal phosphate binding|cysteine desulfurase activity|cysteine desulfurase activity|cysteine desulfurase activity|protein homodimerization activity|	9	-6	167	1e-05	0.024	0.0142	-1.98	16.9	0.0109	-3.33	-0.69	-2.15 : 172491.8	-1.39 : 172484.1	-0.943 : 172488.5	-0.84 : 172485.2	-0.77 : 172490.7	-0.25 : 172492.9	-0.165 : 172493.10	0.572 : 172486.3	1.71 : 172487.4		18041	0	-1	NaN	NaN	NaN	NaN	0.434435	0	0	-2.06966	0	0
ENSMUSG00000066306	NUMA1		NUMA1	B	nuclear mitotic apparatus protein 1	Golgi membrane|spindle pole|nucleus|nucleoplasm|chromosome|cytoplasm|spindle|cytosol|spindle microtubule|nuclear matrix|dendrite|neuronal cell body|apical part of cell|	G2/M transition of mitotic cell cycle|mitotic anaphase|establishment of mitotic spindle orientation|mitotic cell cycle|nucleus organization|mitotic nuclear division|meiotic cell cycle|lung epithelial cell differentiation|	structural molecule activity|protein binding|microtubule binding|	10	-1.8	28.5	0.057	0.00715	0.00115	-1.18	16.9	0.0109	-1.88	-0.75	-1.35 : 158797.8	-1.29 : 158793.4	-1.2 : 158798.9	-0.706 : 158796.7	-0.643 : 158799.10	-0.53 : 158795.6	-0.474 : 158790.1	0.181 : 158791.2	0.187 : 158794.5	0.231 : 158792.3	101706	0	0	NaN	NaN	1	0	0.353933	0	0	-11.6486	1	0
ENSMUSG00000026753	PPP6C		PPP6C	B	protein phosphatase 6, catalytic subunit	cytosol|	G1/S transition of mitotic cell cycle|protein dephosphorylation|	protein serine/threonine phosphatase activity|protein binding|metal ion binding|	10	-2.6	45	0.0151	0.0109	0.0123	-1.42	16.9	0.0109	-2.55	-0.83	-1.71 : 3426.3	-1.37 : 3425.2	-1.16 : 3430.7	-0.802 : 3431.8	-0.772 : 3433.10	-0.455 : 3428.5	-0.196 : 3432.9	-0.137 : 3429.6	0.473 : 3424.1	0.703 : 3427.4	67857	0	0	NaN	NaN	1	0	0.359479	0	0	-0.508054	0	0
ENSMUSG00000061619	VMA21-PS			D	VMA21 vacuolar H+-ATPase homolog (S. cerevisiae), pseudogene	None	None	None	10	-3.4	3.73	0.671	0.598	0.826	-3.02	18.3	0.0109	-5.97	-2.17	-3.12 : 49258.6	-2.12 : 49256.4	-0.53 : 49261.9	-0.306 : 49260.8	-0.194 : 49254.2	-0.00532 : 49253.1	0.114 : 49262.10	0.388 : 49257.5	0.548 : 49255.3	1.83 : 49259.7	100040883	0	0	NaN	NaN	1	0	NaN	NaN	NaN	NaN	NaN	NaN
ENSMUSG00000025408	DDIT3		DDIT3	B	DNA-damage-inducible transcript 3	nucleus|nucleoplasm|late endosome|	blood vessel maturation|regulation of transcription, DNA-templated|cellular response to DNA damage stimulus|ER overload response|response to unfolded protein|activation of signaling protein activity involved in unfolded protein response|cell cycle arrest|Wnt signaling pathway|endoplasmic reticulum unfolded protein response|positive regulation of interleukin-8 production|response to endoplasmic re…	DNA binding|sequence-specific DNA binding transcription factor activity|transcription corepressor activity|protein binding|transcription factor binding|sequence-specific DNA binding|	10	-1.2	16.8	0.2	0.00642	0.00671	-1.42	16.8	0.011	-2.52	-0.96	-1.59 : 19171.8	-1.47 : 19169.6	-1.43 : 19168.5	-1.06 : 19165.2	-0.627 : 19173.10	-0.365 : 19170.7	-0.314 : 19164.1	0.0992 : 19167.4	0.12 : 19166.3	0.284 : 19172.9	13198	0	0	NaN	NaN	1	0	0.28331	0	0	-5.06065	1	0
ENSMUSG00000021546	HNRNPK		HNRNPK	B	heterogeneous nuclear ribonucleoprotein K	nuclear chromatin|podosome|nucleus|nucleoplasm|cytoplasm|membrane|cell junction|cell projection|extracellular vesicular exosome|catalytic step 2 spliceosome|	mRNA splicing, via spliceosome|mRNA splicing, via spliceosome|transcription, DNA-templated|RNA processing|signal transduction|RNA splicing|gene expression|regulation of low-density lipoprotein particle clearance|viral process|positive regulation of low-density lipoprotein particle receptor biosynthetic process|positive regulation of transcription from RNA polymerase II promoter|positive regulatio…	RNA polymerase II core promoter proximal region sequence-specific DNA binding|RNA polymerase II core promoter proximal region sequence-specific DNA binding transcription factor activity involved in positive regulation of transcription|single-stranded DNA binding|RNA binding|protein binding|poly(A) RNA binding|	7	-6.3	124	1e-05	0.000801	0.00331	-1.31	16.8	0.011	-2.48	-0.67	-1.53 : 125329.6	-1.07 : 125328.5	-0.937 : 125327.4	-0.868 : 125331.8	-0.707 : 125325.2	-0.168 : 125326.3	0.0267 : 125324.1				15387	0	-1	1	NaN	NaN	NaN	0.44322	0	0	-8.98413	0	0
ENSMUSG00000020048	HSP90B1		HSP90B1	A	heat shock protein 90kDa beta (Grp94), member 1	extracellular region|nucleus|endoplasmic reticulum|endoplasmic reticulum|endoplasmic reticulum lumen|endoplasmic reticulum lumen|endoplasmic reticulum membrane|cytosol|plasma membrane|membrane|midbody|melanosome|perinuclear region of cytoplasm|extracellular vesicular exosome|endocytic vesicle lumen|	response to hypoxia|toll-like receptor signaling pathway|protein folding|activation of signaling protein activity involved in unfolded protein response|protein transport|ER-associated ubiquitin-dependent protein catabolic process|endoplasmic reticulum unfolded protein response|actin rod assembly|negative regulation of apoptotic process|negative regulation of apoptotic process|regulation of phosph…	RNA binding|calcium ion binding|protein binding|ATP binding|protein phosphatase binding|virion binding|low-density lipoprotein particle receptor binding|unfolded protein binding|	10	-1.9	31.1	0.0268	0.339	0.0924	-2.82	21.6	0.011	-4.68	-1.7	-2.98 : 63687.7	-1.95 : 63684.4	-1.48 : 63689.9	-1.38 : 63685.5	0.0498 : 63682.2	0.114 : 63690.10	0.147 : 63681.1	0.177 : 63688.8	0.222 : 63683.3	0.307 : 63686.6	22027	0	0	NaN	NaN	1	0	NaN	NaN	NaN	-8.74238	1	0
ENSMUSG00000006678	POLA1		POLA1	B	polymerase (DNA directed), alpha 1, catalytic subunit	chromatin|nucleus|nuclear envelope|nucleoplasm|nucleoplasm|alpha DNA polymerase:primase complex|alpha DNA polymerase:primase complex|nucleolus|cytoplasm|nuclear matrix|	G1/S transition of mitotic cell cycle|regulation of transcription involved in G1/S transition of mitotic cell cycle|mitotic S phase|mitotic cell cycle|telomere maintenance via recombination|telomere maintenance|DNA replication|DNA replication, synthesis of RNA primer|DNA replication initiation|DNA replication initiation|DNA strand elongation involved in DNA replication|DNA strand elongation invol…	nucleotide binding|nucleoside binding|DNA binding|DNA binding|chromatin binding|DNA-directed DNA polymerase activity|DNA-directed DNA polymerase activity|DNA primase activity|protein binding|3'-5' exonuclease activity|metal ion binding|protein heterodimerization activity|4 iron, 4 sulfur cluster binding|	10	-3	25.3	0.0829	0.032	0.00794	-1.29	16.7	0.011	-1.96	-0.93	-1.44 : 121617.4	-1.36 : 121614.1	-1.31 : 121618.5	-0.93 : 121620.7	-0.604 : 121622.9	-0.522 : 121621.8	-0.0123 : 121616.3	0.224 : 121619.6	0.237 : 121623.10	0.257 : 121615.2	18968	0	0	NaN	NaN	1	0	0.479923	0	0	-5.05576	1	0
ENSMUSG00000025737	WDR24		WDR24	B	WD repeat domain 24	None	None	None	10	-2.3	48.2	0.01	0.000365	0.00122	-1.1	16.8	0.011	-2.2	-0.58	-1.56 : 68552.4	-1.12 : 68555.7	-0.966 : 68557.9	-0.834 : 68554.6	-0.721 : 68556.8	-0.49 : 68553.5	-0.47 : 68550.2	-0.135 : 68551.3	-0.0495 : 68549.1	0.152 : 68558.10	268933	0	0	NaN	NaN	1	0	0.477593	0	0	-5.58082	0	0
ENSMUSG00000051827	RHOX2A			D	reproductive homeobox 2A	cellular_component|	negative regulation of transcription from RNA polymerase II promoter|	molecular_function|	10	-2.9	42.9	0.0317	0.53	0.105	-1.98	17.9	0.0111	-3.62	-1.35	-2.19 : 93852.6	-2.0 : 93853.7	-1.72 : 93855.9	-1.31 : 93849.3	-0.265 : 93850.4	-0.166 : 93854.8	0.445 : 93851.5	0.839 : 93848.2	0.904 : 93856.10	1.18 : 93847.1	75199	8	0	NaN	NaN	1	0	NaN	NaN	NaN	-4.97415	0	0
ENSMUSG00000020166	CNOT2		CNOT2	B	CCR4-NOT transcription complex, subunit 2	nucleus|cytoplasm|cytosol|membrane|CCR4-NOT complex|	negative regulation of transcription from RNA polymerase II promoter|nuclear-transcribed mRNA catabolic process, deadenylation-dependent decay|nuclear-transcribed mRNA poly(A) tail shortening|trophectodermal cell differentiation|regulation of transcription from RNA polymerase II promoter|transcription from RNA polymerase II promoter|regulation of translation|gene expression|positive regulation of…	RNA polymerase II transcription cofactor activity|RNA polymerase II transcription corepressor binding|poly(A)-specific ribonuclease activity|protein binding|	10	0.8	20.6	0.168	1.15e-05	2.23e-05	-0.7	16.5	0.0112	-1.34	-0.32	-0.905 : 69793.5	-0.832 : 69797.9	-0.813 : 69792.4	-0.615 : 69798.10	-0.606 : 69796.8	-0.507 : 69795.7	-0.386 : 69791.3	-0.349 : 69790.2	-0.345 : 69789.1	-0.138 : 69794.6	72068	0	0	NaN	NaN	1	0	0.522097	0	0	NaN	NaN	0
ENSMUSG00000037712	FERMT2		FERMT2	B	fermitin family member 2	stress fiber|nucleus|cytoplasm|cytosol|focal adhesion|cell cortex|cell surface|extrinsic component of cytoplasmic side of plasma membrane|lamellipodium membrane|I band|filamentous actin|	cell-matrix adhesion|cell-matrix adhesion|transforming growth factor beta receptor signaling pathway|integrin-mediated signaling pathway|regulation of cell shape|Wnt signaling pathway|integrin activation|cell junction assembly|substrate adhesion-dependent cell spreading|focal adhesion assembly|protein localization to membrane|	protein binding|phosphatidylinositol-3,4,5-trisphosphate binding|	9	-5.1	99.3	3e-05	0.011	0.0437	-2.39	16.5	0.0112	-4.54	-1.66	-2.5 : 220823.10	-1.99 : 220818.5	-1.57 : 220816.3	-0.567 : 220817.4	-0.34 : 220815.2	-0.104 : 220822.9	-0.0747 : 220821.8	-0.0532 : 220819.6	0.358 : 220820.7		218952	0	-1	NaN	NaN	NaN	NaN	0.2738	0	0	-0.794921	0	0
ENSMUSG00000057666	GAPDH		GAPDH	B	glyceraldehyde-3-phosphate dehydrogenase	nucleus|nucleus|cytoplasm|cytoplasm|lipid particle|cytosol|cytosol|plasma membrane|microtubule cytoskeleton|membrane|ribonucleoprotein complex|perinuclear region of cytoplasm|extracellular vesicular exosome|GAIT complex|	microtubule cytoskeleton organization|carbohydrate metabolic process|glucose metabolic process|gluconeogenesis|glycolytic process|glycolytic process|negative regulation of translation|negative regulation of translation|peptidyl-cysteine S-trans-nitrosylation|small molecule metabolic process|protein stabilization|neuron apoptotic process|oxidation-reduction process|cellular response to interferon-…	glyceraldehyde-3-phosphate dehydrogenase (NAD+) (phosphorylating) activity|glyceraldehyde-3-phosphate dehydrogenase (NAD+) (phosphorylating) activity|protein binding|microtubule binding|peptidyl-cysteine S-nitrosylase activity|identical protein binding|NADP binding|NAD binding|	10	-4.7	153	1e-05	0.0022	0.000977	-1.53	16.4	0.0112	-2.47	-0.55	-1.81 : 148389.7	-1.14 : 148387.5	-0.852 : 148391.9	-0.852 : 148392.10	-0.763 : 148384.2	-0.459 : 148390.8	-0.32 : 148386.4	-0.287 : 148385.3	0.132 : 148388.6	0.973 : 148383.1	14433	0	-1	NaN	NaN	NaN	NaN	0.31821	0	0	0.876546	0	0
ENSMUSG00000028703	LRRC41		LRRC41	B	leucine rich repeat containing 41	membrane|	protein ubiquitination|	None	10	-1.7	48.5	0.00957	0.435	0.0268	-1.6	16.4	0.0112	-2.72	-1.01	-1.82 : 206964.3	-1.48 : 206963.2	-1.23 : 206965.4	-1.04 : 206968.7	-0.721 : 206962.1	-0.0472 : 206971.10	0.405 : 206967.6	0.472 : 206966.5	0.519 : 206970.9	1.0 : 206969.8	230654	0	0	NaN	NaN	1	0	0.315897	0	0	-1.81323	0	0
ENSMUSG00000044702	PALB2		PALB2	B	partner and localizer of BRCA2	nucleus|nucleoplasm|	double-strand break repair via homologous recombination|somitogenesis|inner cell mass cell proliferation|DNA repair|mesoderm development|organ morphogenesis|post-anal tail morphogenesis|negative regulation of apoptotic process|	DNA binding|protein binding|	9	-1.2	27.9	0.0614	0.035	0.00453	-0.96	16.5	0.0112	-1.79	-0.61	-1.24 : 82692.9	-0.997 : 82686.3	-0.963 : 82691.8	-0.955 : 82685.2	-0.493 : 82687.4	-0.49 : 82690.7	-0.0138 : 82693.10	0.571 : 82689.6	1.0 : 82688.5		233826	0	0	NaN	NaN	1	0	0.614213	0	0	-0.613703	0	0
ENSMUSG00000060126	TPT1		TPT1	B	tumor protein, translationally-controlled 1	extracellular space|nucleus|nucleoplasm|cytoplasm|cytoplasm|multivesicular body|tubulin complex|	calcium ion transport|cellular calcium ion homeostasis|response to virus|stem cell maintenance|regulation of apoptotic process|negative regulation of apoptotic process|negative regulation of intrinsic apoptotic signaling pathway in response to DNA damage|negative regulation of ectoderm development|	calcium ion binding|protein binding|transcription factor binding|poly(A) RNA binding|	10	-3.7	93.1	5e-05	0.000182	0.000148	-2.18	16.4	0.0112	-3.69	-0.93	-2.36 : 145505.9	-1.78 : 145498.2	-0.852 : 145501.5	-0.748 : 145502.6	-0.56 : 145504.8	-0.464 : 145500.4	-0.424 : 145497.1	-0.412 : 145506.10	0.0511 : 145503.7	0.0546 : 145499.3	22070	0	-1	NaN	NaN	NaN	NaN	0.345857	0	0	0.942875	0	0
ENSMUSG00000096386	VMN1R100			D	vomeronasal 1 receptor 100	cellular_component|	biological_process|	molecular_function|	10	-4.1	69.9	0.00213	0.0101	0.00466	-1.72	17.7	0.0112	-2.74	-0.9	-1.9 : 168181.10	-1.86 : 168180.9	-1.1 : 168172.1	-1.05 : 168174.3	-1.0 : 168175.4	-0.822 : 168178.7	-0.279 : 168177.6	-0.0796 : 168173.2	0.392 : 168176.5	1.78 : 168179.8	100043536	10	-1	NaN	NaN	NaN	NaN	NaN	NaN	NaN	NaN	NaN	NaN
ENSMUSG00000095543	VMN1R148			D	vomeronasal 1 receptor 148	cellular_component|	biological_process|	molecular_function|	10	-4.1	69.9	0.00213	0.0101	0.00466	-1.72	17.7	0.0112	-2.74	-0.9	-1.9 : 130722.10	-1.86 : 130721.9	-1.1 : 130713.1	-1.05 : 130715.3	-1.0 : 130716.4	-0.822 : 130719.7	-0.279 : 130718.6	-0.0796 : 130714.2	0.392 : 130717.5	1.78 : 130720.8	81011	10	-1	NaN	NaN	NaN	NaN	NaN	NaN	NaN	-1.99484	0	0
ENSMUSG00000041297	CDK13		CDK13	B	cyclin-dependent kinase 13	cyclin K-CDK13 complex|extracellular space|nuclear speck|nuclear cyclin-dependent protein kinase holoenzyme complex|	alternative mRNA splicing, via spliceosome|alternative mRNA splicing, via spliceosome|regulation of mitosis|multicellular organismal development|positive regulation of cell proliferation|viral process|hemopoiesis|phosphorylation of RNA polymerase II C-terminal domain|	protein kinase activity|cyclin-dependent protein serine/threonine kinase activity|protein binding|ATP binding|RNA polymerase II carboxy-terminal domain kinase activity|cyclin binding|poly(A) RNA binding|	9	0.3	1.61	0.706	1.68e-05	0.000129	0.69	16.3	0.0113	0.33	1.45	0.168 : 167201.10	0.301 : 167196.5	0.344 : 167200.9	0.421 : 167199.8	0.57 : 167193.2	0.675 : 167195.4	0.712 : 167194.3	0.784 : 167192.1	1.02 : 167198.7		69562	0	0	NaN	NaN	1	0	0.424067	0	0	-0.20826	0	0
ENSMUSG00000094249	GM20091			D	cytochrome c oxidase, subunit VIIc pseudogene	None	None	None	10	-2.8	6.15	0.536	0.00759	0.0093	-2.04	17.4	0.0113	-3.84	-1.15	-2.23 : 97278.6	-2.11 : 97281.9	-1.05 : 97275.3	-0.937 : 97282.10	-0.541 : 97276.4	-0.384 : 97274.2	-0.353 : 97280.8	-0.227 : 97273.1	0.223 : 97279.7	2.38 : 97277.5	100504157	0	0	NaN	NaN	1	0	NaN	NaN	NaN	NaN	NaN	NaN
ENSMUSG00000096732	GM8897			D	predicted gene 8897	None	None	None	10	-3.3	50	0.0153	0.0681	0.0111	-2.51	17.5	0.0113	-4.78	-1.79	-2.61 : 113834.3	-2.61 : 113833.2	-0.922 : 113838.7	-0.785 : 113840.9	-0.661 : 113841.10	-0.376 : 113832.1	-0.363 : 113839.8	0.359 : 113835.4	0.792 : 113836.5	1.49 : 113837.6	667961	9	0	NaN	NaN	1	0	NaN	NaN	NaN	NaN	NaN	NaN
ENSMUSG00000020841	CPD		CPD	B	carboxypeptidase D	membrane|integral component of membrane|extracellular vesicular exosome|	proteolysis|	metallocarboxypeptidase activity|serine-type carboxypeptidase activity|zinc ion binding|	10	-2.8	52.3	0.00586	0.0162	0.0132	-1.23	16.2	0.0114	-1.9	-0.76	-1.38 : 218758.3	-1.35 : 218764.9	-1.03 : 218760.5	-0.89 : 218759.4	-0.715 : 218761.6	-0.445 : 218762.7	-0.0602 : 218763.8	0.0374 : 218756.1	0.263 : 218757.2	0.273 : 218765.10	12874	0	0	NaN	NaN	1	0	0.27014	0	0	-1.01936	0	0
ENSMUSG00000094132	GM3264			D	predicted gene 3264	None	None	None	10	-4.7	166	1e-05	5.68e-05	4.4e-05	-0.9	17.2	0.0114	-1.64	-0.5	-1.12 : 12229.4	-1.04 : 12228.3	-0.991 : 12232.7	-0.967 : 12233.8	-0.951 : 12231.6	-0.748 : 12235.10	-0.55 : 12234.9	-0.448 : 12227.2	-0.414 : 12230.5	0.175 : 12226.1	100041306	10	-1	NaN	NaN	NaN	NaN	NaN	NaN	NaN	NaN	NaN	NaN
ENSMUSG00000034311	KIF4		KIF4A	B	kinesin family member 4	nucleus|chromosome|cytoplasm|cytoskeleton|kinesin complex|microtubule|membrane|midbody|	microtubule-based movement|	nucleotide binding|DNA binding|microtubule motor activity|ATP binding|microtubule binding|	8	-3.6	124	1e-05	0.0727	0.0128	-1.56	16.2	0.0114	-2.74	-0.85	-1.75 : 70690.2	-1.33 : 70694.6	-0.923 : 70697.9	-0.923 : 70689.1	-0.567 : 70691.3	-0.0428 : 70698.10	0.779 : 70695.7	0.827 : 70692.4			16571	0	-1	NaN	NaN	NaN	NaN	0.265963	0	0	-3.64513	0	0
ENSMUSG00000034032	RPAP1		RPAP1	C	RNA polymerase II associated protein 1	nucleus|	RNA biosynthetic process|	DNA binding|DNA-directed RNA polymerase activity|	10	-1.6	35.8	0.0277	0.446	0.814	-3.57	21.4	0.0114	-7	-3.15	-3.58 : 53163.4	-0.621 : 53168.9	-0.273 : 53169.10	-0.172 : 53166.7	-0.0444 : 53162.3	-0.0437 : 53164.5	0.0744 : 53161.2	0.189 : 53167.8	0.215 : 53165.6	0.246 : 53160.1	68925	0	0	NaN	NaN	1	0	NaN	NaN	NaN	0.475807	0	0
ENSMUSG00000026411	TMEM9		TMEM9	C	transmembrane protein 9	lysosome|lysosomal membrane|late endosome|integral component of membrane|late endosome membrane|	transport|biological_process|	molecular_function|	10	0	0	0.973	0.987	0.699	-3.23	21.4	0.0114	-6	-2.75	-3.24 : 195356.3	-0.459 : 195362.9	-0.327 : 195354.1	-0.167 : 195361.8	-0.0203 : 195357.4	0.0697 : 195358.5	0.0957 : 195359.6	0.479 : 195363.10	0.486 : 195360.7	0.518 : 195355.2	66241	0	0	NaN	NaN	1	0	0.416707	0	0	0.895255	0	0
ENSMUSG00000096463	GM21750			D	N/A	None	None	None	7	-7	198	1e-05	0.337	0.155	2.75	17	0.0115	2.07	5	-0.929 : 38721.1	-0.647 : 38727.7	-0.647 : 38726.6	-0.463 : 38728.8	-0.0562 : 38725.5	0.931 : 38722.2	2.87 : 38723.3				NaN	0	-1	NaN	NaN	NaN	NaN	NaN	NaN	NaN	NaN	NaN	NaN
ENSMUSG00000038542	PCID2		PCID2	A	PCI domain containing 2	cellular_component|	negative regulation of apoptotic process|regulation of mRNA stability|positive regulation of B cell differentiation|positive regulation of transcription, DNA-templated|spleen development|positive regulation of mitotic cell cycle spindle assembly checkpoint|negative regulation of cysteine-type endopeptidase activity|	None	10	-4.4	79.1	0.00022	0.000597	0.000676	-2.6	21.5	0.0115	-4.27	-1.15	-2.82 : 164608.6	-1.72 : 164609.7	-1.31 : 164606.4	-1.01 : 164605.3	-0.959 : 164603.1	-0.542 : 164612.10	-0.412 : 164611.9	-0.326 : 164610.8	0.131 : 164607.5	0.289 : 164604.2	234069	0	-1	NaN	NaN	NaN	NaN	0.507563	0	0	2.34347	0	0
ENSMUSG00000091609	ACER2		ACER2	B	alkaline ceramidase 2	Golgi membrane|Golgi apparatus|integral component of Golgi membrane|	negative regulation of cell-matrix adhesion|sphingolipid metabolic process|ceramide metabolic process|activation of cysteine-type endopeptidase activity involved in apoptotic process|positive regulation of cell proliferation|positive regulation of cell death|sphingolipid biosynthetic process|response to retinoic acid|negative regulation of cell adhesion mediated by integrin|cellular response to d…	ceramidase activity|dihydroceramidase activity|	8	-6.3	156	1e-05	0.335	0.0904	1.56	15.9	0.0116	1.14	2.9	-1.66 : 38903.6	-1.38 : 38900.3	-0.747 : 38899.2	0.264 : 38898.1	0.51 : 38904.7	1.37 : 38905.8	1.59 : 38906.9	1.72 : 38901.4			230379	0	-1	NaN	NaN	NaN	NaN	0.373847	0	0	-5.57592	0	0
ENSMUSG00000034931	DHX8		DHX8	B	DEAH (Asp-Glu-Ala-His) box polypeptide 8	nucleus|spliceosomal complex|catalytic step 2 spliceosome|	mRNA splicing, via spliceosome|ATP catabolic process|ATP catabolic process|RNA processing|RNA splicing|	ATP-dependent RNA helicase activity|protein binding|ATP binding|identical protein binding|poly(A) RNA binding|	10	-2.7	30	0.0464	0.00025	0.000847	-0.89	16	0.0116	-1.62	-0.45	-1.14 : 79094.5	-0.966 : 79099.10	-0.954 : 79093.4	-0.656 : 79092.3	-0.579 : 79095.6	-0.514 : 79091.2	-0.51 : 79090.1	-0.0932 : 79096.7	-0.0817 : 79098.9	0.0488 : 79097.8	217207	0	0	NaN	NaN	1	0	0.388407	0	0	-4.63477	0	0
ENSMUSG00000094036	GM6465			D	predicted gene 6465	None	None	None	9	-5.6	52.3	0.0123	0.132	0.0338	-2.53	16.8	0.0116	-4.78	-1.89	-2.61 : 132783.3	-2.61 : 132782.2	-0.922 : 132787.7	-0.661 : 132789.9	-0.398 : 132784.4	-0.363 : 132788.8	0.359 : 132785.5	0.571 : 132781.1	0.792 : 132786.6		623998	8	0	NaN	NaN	1	0	NaN	NaN	NaN	NaN	NaN	NaN
ENSMUSG00000069265	HIST1H3A		HIST1H3D	B	histone cluster 1, H3a	None	None	None	7	-4.1	90.6	7e-05	0.000123	0.00117	-1.87	16	0.0116	-3.27	-0.49	-2.03 : 104765.5	-1.06 : 104762.2	-0.727 : 104768.8	-0.727 : 104766.6	-0.671 : 104763.3	-0.373 : 104761.1	-0.153 : 104764.4				360198	3	-1	NaN	NaN	NaN	NaN	0.33865	0	0	-1.37257	0	0
ENSMUSG00000052684	JUN		JUN	B	jun proto-oncogene	nuclear chromosome|nucleoplasm|transcription factor complex|nuclear euchromatin|cytosol|transcriptional repressor complex|	angiogenesis|microglial cell activation|release of cytochrome c from mitochondria|liver development|positive regulation of endothelial cell proliferation|toll-like receptor signaling pathway|MyD88-dependent toll-like receptor signaling pathway|MyD88-independent toll-like receptor signaling pathway|outflow tract morphogenesis|transcription from RNA polymerase II promoter|transforming growth factor…	RNA polymerase II distal enhancer sequence-specific DNA binding|RNA polymerase II core promoter proximal region sequence-specific DNA binding transcription factor activity involved in positive regulation of transcription|RNA polymerase II activating transcription factor binding|RNA polymerase II transcription factor binding transcription factor activity involved in positive regulation of transcri…	10	-4.3	93.5	5e-05	0.00089	0.00243	-0.91	15.9	0.0116	-1.63	-0.47	-1.07 : 122354.4	-1.04 : 122355.5	-0.967 : 122351.1	-0.704 : 122353.3	-0.647 : 122358.8	-0.49 : 122357.7	-0.318 : 122352.2	-0.242 : 122360.10	-0.111 : 122359.9	1.45 : 122356.6	16476	0	-1	NaN	NaN	NaN	NaN	0.322552	0	0	-5.96002	0	0
ENSMUSG00000038612	MCL1		MCL1	B	myeloid cell leukemia 1	nucleus|nucleoplasm|cytoplasm|mitochondrion|mitochondrial outer membrane|mitochondrial outer membrane|mitochondrial matrix|cytosol|membrane|membrane|integral component of membrane|Bcl-2 family protein complex|	cell fate determination|multicellular organismal development|intrinsic apoptotic signaling pathway in response to DNA damage|apoptotic mitochondrial changes|cellular homeostasis|response to cytokine|protein transmembrane transport|extrinsic apoptotic signaling pathway in absence of ligand|execution phase of apoptosis|negative regulation of execution phase of apoptosis|negative regulation of anoik…	protein binding|protein channel activity|protein homodimerization activity|protein heterodimerization activity|BH3 domain binding|	10	-1.4	16.7	0.201	0.000153	0.00204	-1.04	16	0.0116	-2.31	-0.55	-1.67 : 60991.7	-1.06 : 60993.9	-1.01 : 60990.6	-0.73 : 60994.10	-0.725 : 60988.4	-0.669 : 60987.3	-0.253 : 60992.8	-0.247 : 60985.1	-0.0452 : 60986.2	0.0187 : 60989.5	17210	0	0	NaN	NaN	1	0	0.304975	0	0	-6.73261	0	1
ENSMUSG00000018841	RAD51D		RAD51D	B	RAD51 paralog D	chromosome, telomeric region|nucleus|replication fork|cytoplasm|centrosome|Rad51B-Rad51C-Rad51D-XRCC2 complex|	telomere maintenance|double-strand break repair via homologous recombination|ATP catabolic process|ATP catabolic process|DNA repair|reciprocal meiotic recombination|strand invasion|	four-way junction DNA binding|DNA binding|single-stranded DNA binding|protein binding|ATP binding|DNA-dependent ATPase activity|gamma-tubulin binding|	9	-3.7	86.2	0.00012	0.111	0.0694	-1.92	15.9	0.0116	-3.51	-0.82	-2.08 : 164555.3	-1.27 : 164562.10	-1.12 : 164560.8	-0.968 : 164559.7	-0.382 : 164556.4	-0.221 : 164557.5	0.165 : 164554.2	1.22 : 164558.6	1.52 : 164561.9		19364	0	-1	NaN	NaN	NaN	NaN	0.702963	0	1	NaN	NaN	0
ENSMUSG00000026942	TRAF2		TRAF2	B	TNF receptor-associated factor 2	cytoplasm|cytosol|cell cortex|cytoplasmic side of plasma membrane|CD40 receptor complex|membrane raft|	positive regulation of T cell cytokine production|protein complex assembly|apoptotic process|activation of cysteine-type endopeptidase activity involved in apoptotic process|signal transduction|activation of NF-kappaB-inducing kinase activity|protein catabolic process|positive regulation of interleukin-2 production|tumor necrosis factor-mediated signaling pathway|negative regulation of glial cell…	ubiquitin-protein transferase activity|signal transducer activity|tumor necrosis factor receptor binding|CD40 receptor binding|protein binding|zinc ion binding|ligase activity|enzyme binding|protein phosphatase binding|mitogen-activated protein kinase kinase kinase binding|ubiquitin protein ligase binding|thioesterase binding|protein complex binding|identical protein binding|sphingolipid binding|	10	1.5	57.4	0.00288	9.7e-06	5.76e-05	-0.63	15.9	0.0116	-1.28	-0.31	-0.889 : 146278.2	-0.773 : 146280.4	-0.667 : 146285.9	-0.664 : 146286.10	-0.624 : 146283.7	-0.538 : 146277.1	-0.42 : 146279.3	-0.407 : 146282.6	-0.295 : 146284.8	-0.157 : 146281.5	22030	0	0	NaN	NaN	1	0	0.47917	0	0	-5.15127	0	0
ENSMUSG00000022209	DHRS2		DHRS2	D	dehydrogenase/reductase (SDR family) member 2	nucleus|nuclear envelope|cytoplasm|mitochondrion|mitochondrial matrix|extracellular vesicular exosome|	C21-steroid hormone metabolic process|negative regulation of cell proliferation|response to toxic substance|cellular response to oxidative stress|myeloid dendritic cell differentiation|negative regulation of apoptotic process|oxidation-reduction process|	carbonyl reductase (NADPH) activity|	10	0.5	2.61	0.737	0.0022	0.00189	-1.32	16.7	0.0117	-2.36	-0.72	-1.63 : 197709.8	-1.41 : 197707.6	-1.37 : 197703.2	-0.964 : 197710.9	-0.92 : 197705.4	-0.85 : 197704.3	-0.557 : 197711.10	0.0682 : 197702.1	0.16 : 197706.5	0.212 : 197708.7	71412	0	0	NaN	NaN	1	0	0.176323	0	0	-3.29581	0	0
ENSMUSG00000096024	GM17174			D	N/A	None	None	None	10	-6	119	1e-05	0.0259	0.0299	-1.93	16.7	0.0117	-3.57	-1.01	-2.11 : 70403.5	-2.03 : 70404.6	-1.18 : 70399.1	-0.922 : 70402.4	-0.903 : 70405.7	-0.306 : 70408.10	-0.0748 : 70401.3	0.0776 : 70407.9	0.138 : 70400.2	1.1 : 70406.8	102631744	2	-1	NaN	NaN	NaN	NaN	NaN	NaN	NaN	NaN	NaN	NaN
ENSMUSG00000030530	FURIN		FURIN	B	furin (paired basic amino acid cleaving enzyme)	Golgi membrane|Golgi lumen|trans-Golgi network|plasma membrane|cell surface|membrane|integral component of membrane|trans-Golgi network transport vesicle|membrane raft|extracellular vesicular exosome|	signal peptide processing|proteolysis|transforming growth factor beta receptor signaling pathway|Notch signaling pathway|cell proliferation|regulation of signal transduction|negative regulation of endopeptidase activity|viral process|protein processing|protein processing|peptide hormone processing|peptidyl-glutamic acid carboxylation|viral life cycle|virion assembly|viral protein processing|extra…	protease binding|endopeptidase activity|serine-type endopeptidase activity|serine-type endopeptidase inhibitor activity|peptidase activity|peptide binding|metal ion binding|nerve growth factor binding|	10	-2.4	65.6	0.00116	0.0478	0.0394	-1.69	15.7	0.0118	-2.78	-1.04	-1.9 : 213905.1	-1.46 : 213914.10	-1.22 : 213909.5	-1.04 : 213913.9	-0.594 : 213912.8	-0.221 : 213911.7	-0.0133 : 213908.4	-0.00498 : 213907.3	0.497 : 213910.6	0.515 : 213906.2	18550	0	0	NaN	NaN	1	0	0.172695	0	0	0.344633	0	0
ENSMUSG00000096528	G430049J08RIK			D	RIKEN cDNA G430049J08 gene	cellular_component|	biological_process|	molecular_function|	10	-6.2	191	1e-05	0.0313	0.0448	-2.33	16.6	0.0118	-4.57	-1.31	-2.53 : 211365.1	-2.17 : 211367.3	-1.16 : 211370.6	-0.785 : 211366.2	-0.732 : 211374.10	-0.248 : 211372.8	-0.212 : 211373.9	0.0756 : 211369.5	0.287 : 211368.4	0.907 : 211371.7	545238	0	-1	NaN	NaN	NaN	NaN	NaN	NaN	NaN	NaN	NaN	NaN
ENSMUSG00000030131	MUG2			D	murinoglobulin 2	extracellular region|extracellular space|	negative regulation of peptidase activity|	endopeptidase inhibitor activity|serine-type endopeptidase inhibitor activity|peptidase inhibitor activity|	10	0.3	0.547	0.879	0.376	0.43	-3.15	16.5	0.0118	-6	-2.42	-3.2 : 193966.2	-0.125 : 193969.5	-0.0775 : 193972.8	-0.0644 : 193970.6	-0.0107 : 193971.7	0.091 : 193974.10	0.272 : 193965.1	0.313 : 193968.4	0.724 : 193967.3	0.95 : 193973.9	17837	0	0	NaN	NaN	1	0	NaN	NaN	NaN	-1.85495	0	0
ENSMUSG00000071662	POLR2G		POLR2G	B	polymerase (RNA) II (DNA directed) polypeptide G	cytoplasmic mRNA processing body|nucleus|nucleoplasm|DNA-directed RNA polymerase II, core complex|nucleolus|	nuclear-transcribed mRNA catabolic process, exonucleolytic|mRNA splicing, via spliceosome|DNA repair|transcription-coupled nucleotide-excision repair|nucleotide-excision repair|transcription from RNA polymerase II promoter|transcription from RNA polymerase II promoter|transcription initiation from RNA polymerase II promoter|transcription initiation from RNA polymerase II promoter|transcription el…	single-stranded DNA binding|single-stranded RNA binding|DNA-directed RNA polymerase activity|translation initiation factor binding|	10	-5.1	109	2e-05	0.152	0.0214	-1.29	15.6	0.0119	-2.39	-0.68	-1.58 : 67163.7	-1.07 : 67157.1	-0.972 : 67166.10	-0.929 : 67159.3	-0.914 : 67158.2	-0.118 : 67160.4	0.115 : 67161.5	0.188 : 67165.9	0.324 : 67164.8	1.38 : 67162.6	67710	0	-1	NaN	NaN	NaN	NaN	0.2683	0	0	-7.16749	1	0
ENSMUSG00000041997	TLK1		TLK1	B	tousled-like kinase 1	nucleus|nucleus|	regulation of chromatin assembly or disassembly|protein phosphorylation|intracellular protein transport|cellular response to DNA damage stimulus|cell cycle|chromatin modification|intracellular signal transduction|	protein serine/threonine kinase activity|protein serine/threonine kinase activity|ATP binding|	10	-1.4	6.3	0.389	0.000409	0.000556	0.99	15.6	0.0119	0.47	1.74	-0.597 : 223195.7	0.186 : 223197.9	0.244 : 223189.1	0.292 : 223198.10	0.432 : 223191.3	0.582 : 223194.6	0.643 : 223196.8	0.7 : 223190.2	1.09 : 223192.4	1.28 : 223193.5	228012	0	0	NaN	NaN	1	0	0.418367	0	0	-5.33099	1	0
ENSMUSG00000095814	GM14374			D	predicted gene 14374	cellular_component|	biological_process|	molecular_function|	10	-3.9	49.8	0.0156	0.176	0.277	2.79	16.1	0.012	2.06	5	-1.7 : 200678.9	-0.466 : 200676.7	-0.0612 : 200672.3	0.0367 : 200677.8	0.197 : 200675.6	0.345 : 200671.2	0.396 : 200679.10	0.445 : 200674.5	0.485 : 200670.1	2.89 : 200673.4	NaN	9	0	NaN	NaN	NaN	NaN	NaN	NaN	NaN	-1.05893	0	NaN
ENSMUSG00000051936	PRSS58		PRSS58	C	protease, serine, 58	extracellular region|	proteolysis|	serine-type endopeptidase activity|	10	-1.5	1.04	0.861	0.523	0.436	-3.16	21.3	0.012	-6	-2.69	-3.17 : 7568.3	-0.403 : 7571.6	-0.21 : 7574.9	-0.188 : 7569.4	0.0296 : 7567.2	0.211 : 7572.7	0.37 : 7575.10	0.375 : 7573.8	0.454 : 7566.1	2.16 : 7570.5	232717	0	0	0	NaN	1	0	NaN	NaN	NaN	-4.7246	0	0
ENSMUSG00000057863	RPL36		RPL36	D	ribosomal protein L36	nucleolus|cytoplasm|cytosol|membrane|cytosolic large ribosomal subunit|	nuclear-transcribed mRNA catabolic process, nonsense-mediated decay|translation|translation|translational initiation|translational elongation|translational termination|SRP-dependent cotranslational protein targeting to membrane|gene expression|viral process|RNA metabolic process|mRNA metabolic process|viral life cycle|viral transcription|cellular protein metabolic process|	structural constituent of ribosome|poly(A) RNA binding|	6	-6.5	254	1e-05	0.779	0.307	-2.18	16.1	0.012	-4	-1.69	-2.24 : 178744.1	-2.24 : 178747.4	-0.568 : 178748.5	0.215 : 178753.10	0.981 : 178752.9	1.84 : 178746.3					54217	4	-1	NaN	NaN	NaN	NaN	0.222457	0	0	NaN	NaN	0
ENSMUSG00000036309	SKP1A		SKP1	B	S-phase kinase-associated protein 1A	cytosol|SCF ubiquitin ligase complex|SCF ubiquitin ligase complex|Cul7-RING ubiquitin ligase complex|Cul7-RING ubiquitin ligase complex|PcG protein complex|extracellular vesicular exosome|	ubiquitin-dependent protein catabolic process|protein ubiquitination|protein ubiquitination|SCF-dependent proteasomal ubiquitin-dependent protein catabolic process|SCF-dependent proteasomal ubiquitin-dependent protein catabolic process|histone H2A monoubiquitination|	ubiquitin-protein transferase activity|ubiquitin-protein transferase activity|protein binding|	10	-3.2	70.8	0.00086	0.00475	0.0273	-1.34	15.5	0.012	-2.46	-0.77	-1.59 : 141440.2	-1.35 : 141446.8	-1.07 : 141441.3	-0.946 : 141448.10	-0.712 : 141447.9	-0.265 : 141443.5	-0.189 : 141442.4	-0.0456 : 141439.1	0.159 : 141444.6	0.163 : 141445.7	21402	0	-1	NaN	NaN	NaN	NaN	0.462947	0	0	-2.78793	0	0
ENSMUSG00000049488	TMEM67		TMEM67	B	transmembrane protein 67	endoplasmic reticulum membrane|centrosome|integral component of membrane|cytoplasmic vesicle membrane|TCTN-B9D complex|ciliary membrane|	negative regulation of centrosome duplication|ER-associated ubiquitin-dependent protein catabolic process|cilium assembly|cilium morphogenesis|	protein binding|filamin binding|unfolded protein binding|	10	-0.5	6.98	0.363	1.43e-05	0.000105	-1.01	15.5	0.012	-1.67	-0.43	-1.27 : 26983.6	-1.13 : 26979.2	-0.673 : 26985.8	-0.613 : 26986.9	-0.605 : 26982.5	-0.549 : 26981.4	-0.535 : 26987.10	-0.45 : 26980.3	-0.169 : 26978.1	-0.126 : 26984.7	329795	0	0	NaN	1	1	0	0.90126	1	0	0.250384	0	0
ENSMUSG00000094155	GM21699			D	predicted gene, 21699	None	None	None	10	-3.9	54	0.0103	0.546	0.748	2.8	15.9	0.0121	2.12	5	-1.7 : 62358.8	-0.466 : 62356.6	-0.37 : 62360.10	-0.0612 : 62353.3	0.0367 : 62357.7	0.197 : 62355.5	0.345 : 62352.2	0.396 : 62359.9	0.485 : 62351.1	2.89 : 62354.4	NaN	10	0	NaN	NaN	NaN	NaN	NaN	NaN	NaN	NaN	NaN	NaN
ENSMUSG00000062115	RAI1		RAI1	D	retinoic acid induced 1	nucleus|cytoplasm|	skeletal system development|regulation of transcription from RNA polymerase II promoter|circadian regulation of gene expression|negative regulation of multicellular organism growth|positive regulation of transcription, DNA-templated|	zinc ion binding|enhancer binding|	10	-0.4	3.17	0.706	0.000164	0.000633	-1.25	15.8	0.0121	-2.36	-0.57	-1.81 : 177088.8	-1.35 : 177089.9	-1.02 : 177083.3	-0.894 : 177084.4	-0.838 : 177082.2	-0.802 : 177087.7	-0.679 : 177085.5	-0.42 : 177081.1	-0.065 : 177090.10	0.197 : 177086.6	19377	0	0	NaN	NaN	1	0	0.544437	0	0	-4.15047	0	0
ENSMUSG00000046897	ZFP740		ZNF740	D	zinc finger protein 740	nucleus|	transcription, DNA-templated|regulation of transcription, DNA-templated|biological_process|	nucleic acid binding|metal ion binding|	10	0.2	0.197	0.919	0.0172	0.025	1.04	15.8	0.0121	0.62	1.84	-1.41 : 153306.5	-0.23 : 153302.1	-0.112 : 153303.2	0.281 : 153305.4	0.341 : 153304.3	0.693 : 153308.7	1.01 : 153307.6	1.13 : 153309.8	1.23 : 153311.10	1.33 : 153310.9	68744	0	0	NaN	NaN	1	0	0.534783	0	0	-0.430546	0	0
ENSMUSG00000062087	4930423O20RIK			D	RIKEN cDNA 4930423O20 gene	cellular_component|	biological_process|	molecular_function|	7	-6.6	201	1e-05	0.00319	0.00392	-2.27	15.7	0.0122	-3.66	-0.86	-2.46 : 14722.9	-1.37 : 14719.6	-1.25 : 14721.8	-0.907 : 14718.5	-0.838 : 14715.2	0.016 : 14714.1	0.103 : 14723.10				73946	1	-1	NaN	NaN	NaN	NaN	NaN	NaN	NaN	NaN	NaN	NaN
ENSMUSG00000073730	4933415F23RIK			D	RIKEN cDNA 4933415F23 gene	cellular_component|	innate immune response|	molecular_function|	10	0.7	5.09	0.589	9.22e-05	0.00195	-1.32	15.7	0.0122	-2.44	-0.71	-1.74 : 126067.6	-1.43 : 126063.2	-1.2 : 126069.8	-1.14 : 126064.3	-0.752 : 126071.10	-0.752 : 126070.9	-0.552 : 126062.1	-0.281 : 126066.5	-0.11 : 126068.7	0.00356 : 126065.4	66755	0	0	NaN	NaN	1	0	NaN	NaN	NaN	-6.67739	0	0
ENSMUSG00000060743	H3F3A		H3F3A	B	H3 histone, family 3A	None	None	None	7	-6.7	119	1e-05	0.137	0.0965	-1.86	15.3	0.0122	-2.99	-1.44	-1.99 : 143107.8	-1.78 : 143100.1	-0.975 : 143105.6	-0.422 : 143108.9	0.168 : 143101.2	0.199 : 143103.4	0.199 : 143104.5				15078	0	-1	NaN	NaN	NaN	NaN	0.435027	0	0	1.61841	0	0
ENSMUSG00000034160	OGT		OGT	B	O-linked N-acetylglucosamine (GlcNAc) transferase	histone acetyltransferase complex|nucleus|nucleoplasm|cytoplasm|mitochondrion|microtubule organizing center|cytosol|plasma membrane|MLL5-L complex|	regulation of glycolytic process|chromatin organization|protein O-linked glycosylation|protein O-linked glycosylation|apoptotic process|signal transduction|response to nutrient|positive regulation of granulocyte differentiation|negative regulation of protein ubiquitination|response to insulin|circadian regulation of gene expression|regulation of Rac protein signal transduction|positive regulation…	protein binding|phosphatidylinositol-3,4,5-trisphosphate binding|enzyme activator activity|acetylglucosaminyltransferase activity|protein N-acetylglucosaminyltransferase activity|histone acetyltransferase activity (H4-K5 specific)|histone acetyltransferase activity (H4-K8 specific)|histone acetyltransferase activity (H4-K16 specific)|protein O-GlcNAc transferase activity|	10	-3.1	77.1	0.00037	0.0478	0.00992	-1.47	15.3	0.0122	-2.56	-0.63	-1.74 : 76910.8	-1.26 : 76908.6	-0.905 : 76907.5	-0.877 : 76912.10	-0.609 : 76906.4	-0.49 : 76905.3	-0.125 : 76903.1	0.131 : 76904.2	0.866 : 76911.9	1.13 : 76909.7	108155	0	-1	NaN	NaN	NaN	NaN	0.27197	0	0	-6.59581	1	0
ENSMUSG00000024947	MEN1		MEN1	B	multiple endocrine neoplasia I	chromatin|nucleus|nucleoplasm|cytoplasm|cytosol|nuclear matrix|cleavage furrow|histone methyltransferase complex|histone methyltransferase complex|protein complex|	negative regulation of transcription from RNA polymerase II promoter|MAPK cascade|leukocyte homeostasis|negative regulation of protein phosphorylation|osteoblast fate commitment|osteoblast development|DNA repair|chromatin remodeling|transcription, DNA-templated|transcription initiation from RNA polymerase II promoter|cellular response to DNA damage stimulus|cell cycle arrest|transforming growth f…	four-way junction DNA binding|Y-form DNA binding|chromatin binding|double-stranded DNA binding|protein binding|histone-lysine N-methyltransferase activity|protein binding, bridging|sequence-specific DNA binding|transcription regulatory region DNA binding|protein N-terminus binding|R-SMAD binding|	10	-3	96.9	4e-05	0.00413	0.00881	-0.91	15.2	0.0123	-1.73	-0.53	-1.21 : 3605.2	-0.957 : 3608.5	-0.937 : 3604.1	-0.89 : 3609.6	-0.456 : 3611.8	-0.425 : 3610.7	-0.21 : 3606.3	-0.175 : 3612.9	0.0952 : 3613.10	0.51 : 3607.4	17283	0	-1	NaN	NaN	NaN	NaN	0.26447	0	0	-2.097	0	0
ENSMUSG00000036112	METAP2		METAP2	B	methionyl aminopeptidase 2	cytoplasm|cytosol|plasma membrane|	proteolysis|phototransduction, visible light|rhodopsin mediated signaling pathway|protein processing|peptidyl-methionine modification|regulation of rhodopsin mediated signaling pathway|N-terminal protein amino acid modification|protein initiator methionine removal|	aminopeptidase activity|metalloexopeptidase activity|poly(A) RNA binding|metal ion binding|metalloaminopeptidase activity|	10	-4.8	94.4	5e-05	0.00139	0.0035	-1.33	15.2	0.0123	-2.48	-0.8	-1.63 : 145889.3	-1.24 : 145895.9	-1.17 : 145894.8	-1.03 : 145896.10	-0.435 : 145892.6	-0.323 : 145888.2	-0.257 : 145890.4	-0.226 : 145891.5	-0.127 : 145887.1	0.996 : 145893.7	56307	0	-1	NaN	NaN	NaN	NaN	0.314923	0	0	-4.28649	0	0
ENSMUSG00000022325	POP1		POP1	B	processing of precursor 1, ribonuclease P/MRP subunit (S. cerevisiae)	ribonuclease MRP complex|extracellular space|nucleolar ribonuclease P complex|	tRNA 5'-leader removal|tRNA catabolic process|RNA phosphodiester bond hydrolysis|RNA phosphodiester bond hydrolysis, endonucleolytic|RNA phosphodiester bond hydrolysis, endonucleolytic|	ribonuclease MRP activity|ribonuclease P activity|protein binding|poly(A) RNA binding|	9	-3.1	80.6	0.00025	0.00696	0.00604	-0.79	15.2	0.0123	-1.64	-0.45	-1.13 : 98192.1	-0.857 : 98195.4	-0.786 : 98193.2	-0.772 : 98197.6	-0.725 : 98198.7	-0.446 : 98200.9	-0.176 : 98196.5	0.123 : 98201.10	0.881 : 98199.8		67724	0	-1	NaN	NaN	NaN	NaN	0.446467	0	0	-8.17248	0	0
ENSMUSG00000021715	CWC27		CWC27	C	CWC27 spliceosome-associated protein homolog (S. cerevisiae)	catalytic step 2 spliceosome|	mRNA splicing, via spliceosome|protein peptidyl-prolyl isomerization|protein folding|	peptidyl-prolyl cis-trans isomerase activity|	10	-0.8	9.58	0.34	0.00489	0.0164	-2.21	21.2	0.0124	-3.59	-1.31	-2.35 : 63310.10	-1.75 : 63302.2	-1.45 : 63305.5	-1.01 : 63309.9	-0.548 : 63301.1	-0.405 : 63308.8	-0.216 : 63306.6	-0.127 : 63304.4	0.252 : 63303.3	0.325 : 63307.7	67285	0	0	NaN	NaN	1	0	0.65785	0	1	-3.71272	0	0
ENSMUSG00000042590	IPO11		IPO11	A	importin 11	nucleus|cytoplasm|	ribosomal protein import into nucleus|	Ran GTPase binding|protein transporter activity|	10	-3.7	75.2	0.00036	0.00408	0.0462	-1.87	21.3	0.0124	-3.4	-1.36	-2.08 : 186500.2	-1.96 : 186501.3	-1.68 : 186506.8	-1.37 : 186505.7	-0.522 : 186507.9	-0.33 : 186499.1	-0.2 : 186508.10	-0.0903 : 186503.5	0.00982 : 186502.4	0.53 : 186504.6	76582	0	-1	NaN	NaN	NaN	NaN	0.527853	0	0	-1.15326	0	0
ENSMUSG00000014245	PIGL		PIGL	C	phosphatidylinositol glycan anchor biosynthesis, class L	endoplasmic reticulum membrane|integral component of membrane|	C-terminal protein lipidation|GPI anchor biosynthetic process|preassembly of GPI anchor in ER membrane|post-translational protein modification|cellular protein metabolic process|	N-acetylglucosaminylphosphatidylinositol deacetylase activity|	10	-0.7	16.4	0.196	0.000173	5.52e-05	-2.3	21.2	0.0124	-3.29	-0.77	-2.48 : 125532.9	-1.52 : 125525.2	-0.953 : 125529.6	-0.933 : 125531.8	-0.91 : 125530.7	-0.573 : 125526.3	-0.549 : 125533.10	-0.514 : 125528.5	-0.133 : 125527.4	0.71 : 125524.1	327942	0	0	NaN	NaN	1	0	0.464425	0	0	-1.78891	0	0
ENSMUSG00000020974	POLE2		POLE2	A	polymerase (DNA directed), epsilon 2, accessory subunit	nucleus|nucleoplasm|epsilon DNA polymerase complex|intracellular membrane-bounded organelle|	G1/S transition of mitotic cell cycle|mitotic cell cycle|telomere maintenance via recombination|telomere maintenance|DNA replication|DNA replication initiation|DNA repair|transcription-coupled nucleotide-excision repair|nucleotide-excision repair|nucleotide-excision repair, DNA gap filling|telomere maintenance via semi-conservative replication|	DNA binding|DNA-directed DNA polymerase activity|	10	-2.8	38	0.0158	0.0582	0.0289	-2.69	21.3	0.0124	-4.58	-1.96	-2.88 : 212677.3	-2.44 : 212682.8	-1.36 : 212678.4	-1.25 : 212676.2	-0.738 : 212675.1	-0.178 : 212683.9	-0.0299 : 212681.7	-0.0207 : 212684.10	0.851 : 212679.5	1.39 : 212680.6	18974	0	0	NaN	NaN	1	0	0.341239	0	0	-2.95508	0	0
ENSMUSG00000048758	RPL29		RPL29	D	ribosomal protein L29	cytosol|membrane|cytosolic large ribosomal subunit|	nuclear-transcribed mRNA catabolic process, nonsense-mediated decay|translation|translation|translational initiation|translational elongation|translational termination|SRP-dependent cotranslational protein targeting to membrane|embryo implantation|gene expression|viral process|RNA metabolic process|mRNA metabolic process|viral life cycle|viral transcription|cellular protein metabolic process|	RNA binding|structural constituent of ribosome|heparin binding|poly(A) RNA binding|	8	-4.6	88.1	0.00022	0.00676	0.00922	1.11	15.5	0.0124	0.66	1.9	-0.51 : 58795.8	0.0776 : 58793.6	0.0996 : 58797.10	0.717 : 58791.4	0.949 : 58790.3	0.949 : 58794.7	1.32 : 58788.1	1.36 : 58789.2			19944	2	-1	NaN	NaN	NaN	NaN	NaN	NaN	NaN	-5.40309	1	0
ENSMUSG00000039994	TIMELESS		TIMELESS	A	timeless circadian clock	nuclear chromatin|nucleus|nucleus|	negative regulation of transcription from RNA polymerase II promoter|morphogenesis of an epithelium|transcription, DNA-templated|cellular response to DNA damage stimulus|mitotic nuclear division|circadian rhythm|detection of abiotic stimulus|response to abiotic stimulus|embryo development|lung development|regulation of circadian rhythm|cell cycle phase transition|negative regulation of transcript…	protein binding|protein homodimerization activity|protein heterodimerization activity|	10	-3.1	78.6	0.00023	0.00425	0.0232	-2.43	21.3	0.0124	-4.19	-1.45	-2.64 : 108797.6	-1.98 : 108794.3	-1.71 : 108795.4	-1.5 : 108793.2	-0.605 : 108798.7	-0.334 : 108796.5	-0.252 : 108792.1	-0.0333 : 108799.8	0.114 : 108800.9	0.326 : 108801.10	21853	0	-1	NaN	NaN	NaN	NaN	0.295893	0	0	-3.57735	0	0
ENSMUSG00000029833	TRIM24		TRIM24	A	tripartite motif containing 24	nucleus|nuclear euchromatin|perichromatin fibrils|cytosol|	transcription from RNA polymerase II promoter|negative regulation of cell proliferation|protein ubiquitination|protein ubiquitination|protein catabolic process|regulation of protein stability|regulation of apoptotic process|response to peptide hormone|negative regulation of transcription, DNA-templated|positive regulation of transcription, DNA-templated|protein autophosphorylation|calcium ion hom…	p53 binding|chromatin binding|transcription coactivator activity|protein kinase activity|ubiquitin-protein transferase activity|receptor binding|protein binding|zinc ion binding|ligase activity|ligand-dependent nuclear receptor binding|estrogen response element binding|sequence-specific DNA binding|lysine-acetylated histone binding|	10	0.1	0.115	0.845	1.11e-05	0.000195	-0.95	21.3	0.0124	-1.66	-0.58	-1.25 : 181284.1	-1.08 : 181293.10	-1.07 : 181288.5	-0.849 : 181291.8	-0.792 : 181292.9	-0.728 : 181286.3	-0.637 : 181287.4	-0.364 : 181285.2	-0.16 : 181289.6	-0.159 : 181290.7	21848	0	0	NaN	NaN	1	0	0.610483	0	0	-4.14687	0	0
ENSMUSG00000027363	USP8		USP8	C	ubiquitin specific peptidase 8	acrosomal vesicle|nucleus|cytoplasm|early endosome|cytosol|cytosol|endosome membrane|extrinsic component of plasma membrane|midbody|	mitotic cytokinesis|ubiquitin-dependent protein catabolic process|endosome organization|Ras protein signal transduction|cell proliferation|protein deubiquitination|protein K63-linked deubiquitination|protein K48-linked deubiquitination|	cysteine-type endopeptidase activity|ubiquitin-specific protease activity|protein binding|SH3 domain binding|	10	-1.8	10.7	0.307	0.332	0.114	-2.73	21.2	0.0124	-4.74	-2.29	-2.8 : 174796.4	-2.71 : 174800.8	-1.33 : 174793.1	-0.948 : 174797.5	-0.12 : 174801.9	0.0617 : 174794.2	0.0668 : 174799.7	0.254 : 174795.3	0.329 : 174798.6	0.437 : 174802.10	84092	0	0	NaN	NaN	1	0	0.251217	0	0	-2.56316	0	0
ENSMUSG00000006058	SNF8		SNF8	B	SNF8, ESCRT-II complex subunit	nucleus|transcription factor complex|cytosol|late endosome membrane|extracellular vesicular exosome|	transcription, DNA-templated|regulation of transcription from RNA polymerase II promoter|protein transport|endosomal transport|membrane organization|	protein binding|transcription factor binding|protein homodimerization activity|	10	-2.9	42.1	0.0171	0.138	0.0246	-2.36	15.1	0.0125	-3.73	-1.12	-2.5 : 53839.10	-1.49 : 53830.1	-1.43 : 53838.9	-0.849 : 53832.3	-0.778 : 53834.5	-0.0357 : 53833.4	0.0594 : 53837.8	0.0594 : 53831.2	0.628 : 53836.7	1.21 : 53835.6	27681	0	0	NaN	NaN	1	0	0.22604	0	0	-3.07197	0	0
ENSMUSG00000008398	ELK3		ELK3	B	ELK3, ETS-domain protein (SRF accessory protein 2)	nucleus|nucleus|mitochondrion|intracellular membrane-bounded organelle|	angiogenesis|regulation of transcription from RNA polymerase II promoter|transcription from RNA polymerase II promoter|signal transduction|cell differentiation|wound healing|negative regulation of transcription, DNA-templated|positive regulation of transcription from RNA polymerase II promoter|	RNA polymerase II core promoter proximal region sequence-specific DNA binding|sequence-specific DNA binding RNA polymerase II transcription factor activity|RNA polymerase II core promoter proximal region sequence-specific DNA binding transcription factor activity involved in positive regulation of transcription|sequence-specific DNA binding transcription factor activity|transcription corepressor …	10	-0.6	10.7	0.267	0.0183	0.0361	-0.91	15	0.0126	-1.71	-0.54	-1.06 : 60227.3	-1.02 : 60226.2	-0.964 : 60225.1	-0.903 : 60228.4	-0.618 : 60233.9	-0.225 : 60234.10	-0.161 : 60232.8	0.0474 : 60230.6	0.226 : 60231.7	0.285 : 60229.5	13713	0	0	NaN	NaN	1	0	0.300427	0	0	-1.83825	0	0
ENSMUSG00000090625	GM20721			D	N/A	None	None	None	10	0.2	0.403	0.894	0.00666	0.0111	1.53	15	0.0126	0.81	2.74	-0.83 : 20096.2	-0.0962 : 20097.3	0.123 : 20099.5	0.133 : 20103.9	0.538 : 20095.1	0.623 : 20104.10	0.651 : 20101.7	1.04 : 20098.4	1.59 : 20100.6	1.82 : 20102.8	NaN	0	0	NaN	NaN	NaN	NaN	NaN	NaN	NaN	NaN	NaN	NaN
ENSMUSG00000079423	GM3286			D	predicted gene 3286	cellular_component|	biological_process|	molecular_function|	8	-0.8	11.3	0.383	0.00258	0.00504	-1.83	14.9	0.0126	-3.26	-0.64	-2.09 : 23031.10	-1.39 : 23025.4	-1.03 : 23024.3	-0.871 : 23030.9	-0.863 : 23022.1	-0.47 : 23026.5	-0.194 : 23029.8	0.697 : 23027.6			100041354	6	0	NaN	NaN	1	0	NaN	NaN	NaN	-0.852875	0	NaN
ENSMUSG00000053907	MAT2A		MAT2A	B	methionine adenosyltransferase II, alpha	cytosol|methionine adenosyltransferase complex|	sulfur amino acid metabolic process|S-adenosylmethionine biosynthetic process|S-adenosylmethionine biosynthetic process|one-carbon metabolic process|xenobiotic metabolic process|methylation|cellular nitrogen compound metabolic process|small molecule metabolic process|	methionine adenosyltransferase activity|protein binding|ATP binding|metal ion binding|	10	-1.1	17.9	0.194	0.00536	0.00807	-1.12	15	0.0126	-1.83	-0.61	-1.36 : 145099.3	-1.19 : 145103.7	-0.923 : 145105.9	-0.782 : 145097.1	-0.584 : 145100.4	-0.517 : 145102.6	-0.24 : 145106.10	-0.0941 : 145098.2	0.267 : 145104.8	0.286 : 145101.5	232087	0	0	NaN	NaN	1	0	0.32394	0	0	-8.03582	1	0
ENSMUSG00000068922	MSTO1		MSTO1	B	misato 1, mitochondrial distribution and morphology regulator	cytoplasm|mitochondrial outer membrane|	mitochondrion organization|mitochondrion distribution|	molecular_function|	9	-4	76.2	0.00041	0.171	0.136	-1.89	15	0.0126	-3.6	-1.28	-2.03 : 72404.3	-1.7 : 72410.9	-1.43 : 72411.10	-0.589 : 72409.8	-0.175 : 72407.6	-0.0801 : 72406.5	0.208 : 72402.1	0.353 : 72405.4	0.46 : 72403.2		229524	0	-1	NaN	NaN	NaN	NaN	0.527717	0	0	-1.17374	0	0
ENSMUSG00000091651	VMN2R36			D	vomeronasal 2, receptor 36	cellular_component|plasma membrane|membrane|integral component of membrane|	signal transduction|G-protein coupled receptor signaling pathway|biological_process|	molecular_function|signal transducer activity|G-protein coupled receptor activity|	10	-2.6	27.1	0.116	0.994	0.292	-2.04	14.9	0.0126	-3.79	-1.39	-2.15 : 71970.9	-2.14 : 71967.6	-1.49 : 71966.5	-0.614 : 71964.3	-0.108 : 71968.7	0.255 : 71965.4	0.526 : 71962.1	0.604 : 71971.10	0.756 : 71963.2	0.818 : 71969.8	100042653	0	0	NaN	0	1	0	NaN	NaN	NaN	NaN	NaN	NaN
ENSMUSG00000079271	1700049E17RIK1			D	RIKEN cDNA 1700049E17 gene, gene 1	cellular_component|	biological_process|	molecular_function|	10	-4.2	51.4	0.0135	0.247	0.0318	-2.36	14.8	0.0127	-4.14	-0.88	-2.58 : 155581.1	-1.71 : 155589.9	-1.24 : 155587.7	-1.12 : 155584.4	-0.868 : 155582.2	-0.268 : 155588.8	0.188 : 155590.10	0.834 : 155585.5	0.86 : 155583.3	0.86 : 155586.6	666214	10	0	NaN	NaN	1	0	NaN	NaN	NaN	NaN	NaN	NaN
ENSMUSG00000095466	GM3015			D	predicted gene 3015	cellular_component|	biological_process|	molecular_function|	10	-6	161	1e-05	0.00287	0.033	-1.8	14.8	0.0127	-3.26	-0.84	-2.11 : 10271.6	-1.45 : 10269.4	-1.37 : 10274.9	-1.22 : 10270.5	-0.836 : 10272.7	-0.232 : 10273.8	-0.21 : 10266.1	-0.048 : 10268.3	0.0776 : 10267.2	0.0776 : 10275.10	100040875	10	-1	NaN	NaN	NaN	NaN	NaN	NaN	NaN	NaN	NaN	NaN
ENSMUSG00000056234	NCOA4		NCOA4	B	nuclear receptor coactivator 4	nucleus|	transcription, DNA-templated|male gonad development|response to hormone|androgen receptor signaling pathway|positive regulation of transcription, DNA-templated|	transcription coactivator activity|androgen receptor binding|	10	-1.1	28.1	0.06	0.000264	0.00337	-1.07	14.9	0.0127	-2.27	-0.58	-1.56 : 217908.4	-1.09 : 217913.9	-1.07 : 217912.8	-0.737 : 217911.7	-0.723 : 217914.10	-0.419 : 217909.5	-0.348 : 217910.6	-0.209 : 217906.2	-0.13 : 217907.3	0.174 : 217905.1	27057	0	0	NaN	NaN	1	0	NaN	NaN	NaN	-7.53421	0	0
ENSMUSG00000020694	TLK2		TLK2	B	tousled-like kinase 2	nucleus|nucleolus|intermediate filament|perinuclear region of cytoplasm|	regulation of chromatin assembly or disassembly|protein phosphorylation|cellular response to DNA damage stimulus|cell cycle|chromosome segregation|negative regulation of autophagy|chromatin modification|peptidyl-serine phosphorylation|negative regulation of proteasomal ubiquitin-dependent protein catabolic process|intracellular signal transduction|cellular response to gamma radiation|	protein serine/threonine kinase activity|protein binding|ATP binding|	10	-0.3	1.67	0.699	0.00057	8.46e-05	0.71	14.9	0.0127	0.29	1.43	-0.621 : 114742.10	0.0186 : 114741.9	0.408 : 114737.5	0.415 : 114740.8	0.428 : 114735.3	0.493 : 114734.2	0.546 : 114733.1	0.674 : 114738.6	0.842 : 114739.7	1.05 : 114736.4	24086	0	0	NaN	NaN	1	0	0.634157	0	0	-2.48504	0	0
ENSMUSG00000034377	TULP4		TULP4	B	tubby like protein 4	cytoplasm|	regulation of transcription, DNA-templated|response to nutrient|protein ubiquitination|intracellular signal transduction|	sequence-specific DNA binding transcription factor activity|	10	-0.9	13.2	0.23	0.0169	0.0298	-1.06	14.9	0.0127	-1.85	-0.71	-1.32 : 12602.8	-1.09 : 12601.7	-1.06 : 12596.2	-1.01 : 12595.1	-0.689 : 12598.4	-0.0462 : 12600.6	0.00835 : 12604.10	0.027 : 12597.3	0.0406 : 12599.5	0.121 : 12603.9	68842	0	0	NaN	NaN	1	0	NaN	NaN	NaN	-8.05565	0	0
ENSMUSG00000030216	WBP11		WBP11	B	WW domain binding protein 11	nucleus|cytoplasm|nuclear speck|	rRNA processing|mRNA processing|RNA splicing|regulation of catalytic activity|	single-stranded DNA binding|protein binding|protein phosphatase type 1 regulator activity|poly(A) RNA binding|WW domain binding|	10	-3.5	96.1	4e-05	0.00308	0.000702	-1.3	14.9	0.0127	-2.38	-0.58	-1.59 : 123108.2	-1.31 : 123107.1	-0.899 : 123109.3	-0.783 : 123115.9	-0.539 : 123111.5	-0.501 : 123112.6	-0.323 : 123113.7	-0.304 : 123116.10	0.194 : 123114.8	1.74 : 123110.4	60321	0	-1	NaN	NaN	NaN	NaN	0.299201	0	0	-14.0597	1	0
ENSMUSG00000097129	4930507D05RIK			D	RIKEN cDNA 4930507D05 gene	None	None	None	9	-4.4	36.9	0.0482	0.397	0.28	-2.01	14.6	0.0128	-3.77	-1.44	-2.19 : 90695.3	-1.86 : 90694.2	-1.86 : 90701.9	-0.239 : 90698.6	-0.0635 : 90697.5	0.0691 : 90699.7	0.0733 : 90696.4	0.537 : 90693.1	1.29 : 90700.8		74706	1	0	NaN	NaN	1	0	NaN	NaN	NaN	NaN	NaN	NaN
ENSMUSG00000027193	API5		API5	B	apoptosis inhibitor 5	nucleus|spliceosomal complex|cytoplasm|membrane|	apoptotic process|negative regulation of apoptotic process|negative regulation of apoptotic process|negative regulation of apoptotic process|negative regulation of fibroblast apoptotic process|	protein binding|fibroblast growth factor binding|poly(A) RNA binding|	10	-0.9	18.2	0.192	9.64e-05	4.73e-05	-0.61	14.8	0.0128	-1.24	-0.29	-0.812 : 44992.7	-0.75 : 44993.8	-0.664 : 44991.6	-0.655 : 44990.5	-0.627 : 44988.3	-0.512 : 44995.10	-0.444 : 44986.1	-0.356 : 44994.9	-0.302 : 44989.4	0.202 : 44987.2	11800	0	0	NaN	NaN	1	0	0.431227	0	0	-3.34804	0	0
ENSMUSG00000022684	BFAR		BFAR	B	bifunctional apoptosis regulator	endoplasmic reticulum membrane|integral component of plasma membrane|membrane|	apoptotic process|negative regulation of apoptotic process|	structural molecule activity|zinc ion binding|	10	0	0	0.942	0.00109	0.00109	-1.9	14.8	0.0128	-3.19	-0.5	-2.11 : 185110.1	-1.46 : 185119.10	-0.807 : 185114.5	-0.656 : 185115.6	-0.604 : 185113.4	-0.537 : 185117.8	-0.482 : 185118.9	-0.201 : 185116.7	0.0677 : 185111.2	0.351 : 185112.3	67118	0	0	NaN	NaN	1	0	0.254113	0	0	-4.10376	0	0
ENSMUSG00000020705	DDX42		DDX42	B	DEAD (Asp-Glu-Ala-Asp) box helicase 42	nucleus|cytoplasm|Cajal body|membrane|nuclear speck|	ATP catabolic process|protein localization|	protein binding|ATP binding|ATP-dependent helicase activity|poly(A) RNA binding|	10	-1.1	8.06	0.328	0.000501	0.00496	-0.89	14.8	0.0128	-1.69	-0.5	-1.15 : 33577.8	-1.01 : 33571.2	-0.876 : 33570.1	-0.812 : 33573.4	-0.657 : 33579.10	-0.278 : 33576.7	-0.211 : 33574.5	-0.206 : 33578.9	-0.089 : 33572.3	0.087 : 33575.6	72047	0	0	NaN	NaN	1	0	0.33589	0	0	-1.18267	0	0
[truncated: 22,162 more rows]

## Sheet: Filtered data
#GeneID	Gene name (mouse)	Alt name	Gene name (human)	KO Batch	GeneInfo	Localization	Process	Function	Element #	casTLE Effect (Growth)	casTLE Score (Growth)	casTLE p-value (Growth)	Signaling pMW	Signaling pKS	Signaling casTLE Effect	Signaling casTLE Score	Signaling casTLE p-value	Minimum Effect Estimate	Maximum Effect Estimate	Individual Elements										NCBI ID	Num dup sgRNAs	Growth flag	Growth reference gene	Cilia/hh reference gene	10% FDR hit?	20% FDR hit?	Roosing et al Score	Roosing et al 10% FDR hit?	Roosing et al 20% FDR hit?	Wheway et al z score	Wheway et al hit?	Jacob et al hit?
[truncated: 20,898 more rows]

[truncated: 6 more sheets: Top472_pos_reg, Top472_neg_reg, Growth defect, no NCBI, Replicates, Batches A-C vs D, SAGvsShhN_mini-screen_compare]
